# Supplementary material for: Short-term transcriptomic analysis at organ scale reveals candidate genes involved in low N responses in NUE-contrasting tomato genotypes
Source: Front Plant Sci. 2023 Mar 3;14:1125378. doi: 10.3389/fpls.2023.1125378 (PMC10020590; doi:10.3389/fpls.2023.1125378)
Supplement: Supplementary file 2 [file Table_1.xlsx]

## Sheet: Table S1
Table S1. Forward and reverse primers of ten candidate genes of interest designed for qRT-PCR experiment.
Gene	Accession ID (NCBI)	Primer Sequences (5' to 3')			Amplicon length (bp)
ASNS	XM_004229380.3	Forward		5'- TTAGGGAGTCTGAGGCAACAAT -3'	88
		Reverse		5'- TGTCACGAAGTGCCTTGTATG -3'
CIPK1	XM_026030915.1	Forward		5'- TTTGGGAGTCCACCGTAATG -3'	124
		Reverse		5'- ACTCAACAAGAGCAGGAGAATAG -3'
LOG8	NM_001257983.1	Forward		5´- CGTTTATTGACAAAGCAGTGGAG -3´	77
		Reverse		5´- GGCATTAGGAGCGGATACAA -3´
GLK2	NM_001279323.2	Forward		5´- TCAAATGAGAGCATAGATGCAG -3´	83
		Reverse		5´- GATGGAGGTTTGAGTCCTATGG -3´
ERF2	XM_004229703.4	Forward		5'- ACCTATGCCACCTAGAGTAACG -3'	87
		Reverse		5'- GATGACGAGGACGAAGTTGT -3'
LEA	XM_004228676.4	Forward		5´- CACAGCTCTAGTCCTATGGTTAAG -3´	115
		Reverse		5´- CACGCTTCGTCTTGTTGTTG -3´
NYFB5	XM_019213216.1	Forward		5´- GACGACATTTGTTGGGCTTTAG -3´	124
		Reverse		5´- CTCCTCCTGCTTGTTCTTGAT -3´
AnnSl5	XM_004230058.4	Forward		5´- TTGATCGCGTCCCTAAGATTG -3´	87
		Reverse		5´- ATCATCATCGTCTGCTCTTGAC -3´
FEI1	XM_010317002.3	Forward		5’- CTCTCAAGGAAGTGGTCCTAATG -3’	105
		Reverse		5’- TCTACATCCTGCTCCTCCAA -3’
LOB37	XM_004231863.4	Forward		5’- ATGGATCGAAACACCGGAAG -3’	92
		Reverse		5’- CGGCGGAAATGAAGGACATA -3’
Actin1*	XM_004253248.1	Forward		5´AGGTATTGTGTTGGACTCTGGTGAT-3´	81
		Reverse		5´-ACGAGAATGGCATGTGGAA-3´
EF1-	XM_004240531.4	Forward		5´-GGAACTTGAGAAGGAGCCTAAG-3´	165
		Reverse		5´-TTCTTGACAACACCGACAGC-3´

## Sheet: Table S2
Table S2. Number of clean reads generated from each sample sequenced (Transeq) and mapped to the tomato genome using TopHat for RO and UC82, at 0h (T0), 8h (T1) and 24h (T2), in HN and LN conditions, in shoot (S) and root (R).
Sample	clean_reads	Mapped-reads	Mapping %
ROT0S	1906022	1280489	67,18
ROT0S	2133203	1306173	61,23
ROT0S	1465065	838270	57,22
ROT0R	3401261	2491873	73,26
ROT0R	2049678	1239176	60,46
ROT0R	3571786	2426064	67,92
UCT0S	1509414	864869	57,3
UCT0S	5178363	3810513	73,59
UCT0S	1419839	821282	57,84
UCT0R	1332848	729165	54,71
UCT0R	3469504	2555943	73,67
UCT0R	3395649	2474260	72,87
ROT1SH	5152158	3748111	72,75
ROT1SH	3586413	2757065	76,88
ROT1SH	2583650	1911254	73,97
ROT1SL	2335660	1642635	70,33
ROT1SL	3559648	2755046	77,4
ROT1SL	1416171	738684	52,16
ROT1RH	3366388	2520089	74,86
ROT1RH	3365036	2451567	72,85
ROT1RH	6093885	4594774	75,4
ROT1RL	14533866	11489361	79,05
ROT1RL	3604946	2615165	72,54
ROT1RL	1367049	795828	58,22
UCT1SH	6217803	4958484	79,75
UCT1SH	3540802	2692242	76,03
UCT1SH	3697532	2856704	77,26
UCT1SL	2299919	1646243	71,58
UCT1SL	2672861	1957243	73,23
UCT1SL	917008	467909	51,03
UCT1RH	3712470	2661288	71,69
UCT1RH	7124110	5830217	81,84
UCT1RH	9329400	7622436	81,7
UCT1RL	9992107	8028419	80,35
UCT1RL	7291868	5863890	80,42
UCT1RL	2092043	1424449	68,09
ROT2SH	2489830	2024078	81,29
ROT2SH	3852398	2955460	76,72
ROT2SH	585464	304249	51,97
ROT2SL	3980049	3077826	77,33
ROT2SL	2159429	1561060	72,29
ROT2SL	15326609	11696417	76,31
ROT2RH	1106165	657169	59,41
ROT2RH	5605041	4289862	76,54
ROT2RH	3174546	2100201	66,16
ROT2RL	11723454	9089555	77,53
ROT2RL	3629206	2626764	72,38
ROT2RL	928381	364513	39,26
UCT2SH	10635783	9125540	85,8
UCT2SH	4703095	3840046	81,65
UCT2SH	5861620	4710523	80,36
UCT2SL	5974063	4979620	83,35
UCT2SL	5595378	4441595	79,38
UCT2SL	9453256	7711955	81,58
UCT2RH	8205400	6643086	80,96
UCT2RH	1070968	798855	74,59
UCT2RH	6337623	5259622	82,99
UCT2RL	6768783	5638612	83,3
UCT2RL	2656735	2079494	78,27
UCT2RL	6317154	5227071	82,74
Total	268825855	206070353	72,14

## Sheet: Table S3
Table S3. Differentially expressed genes (p<0.05) detected by the Likelihood Ratio Test in shoot and root including Genotype (RO and UC82), Time (0h, 8h, 24h), Nitrate (Low N, and High N) and their interactions.
Design	No. of Gene in Shoot	No. of Gene in Root
Genotype (G)	660	759
N level (N)	297	154
Time (T)	5263	4623
G*N	923	694
G*T	5734	5212
N*T	5102	3800
G*N*T	5480	4054
Total unique genes	7667	6015

## Sheet: Table S4
Table S4. Differentially Expressed Genes in shoot. Here we highlighted the co-expression modules and DESeq2 Pvalue adjusted for each factors and their interactions.
			Pvalue adjusted (DESeq2)
Gene ID	Module	Description (SL3.2)	Genotype (G)	N level (N)	Time (T)	GxT	GxN	GxTxN	TxN
Solyc00g007300.3	black	PTHR23155//PTHR23155:SF501 - LEUCINE-RICH REPEAT-CONTAINING PROTEIN // SUBFAMILY NOT NAMED			0.00179488	0.0141175			0.0319561
Solyc00g008680.3	black	PTHR10827:SF52 - IP16409P			0.00110803	0.00602969		0.0371957	0.00497694
Solyc00g009110.3	black	PTHR11200:SF128 - TYPE I INOSITOL 1,4,5-TRISPHOSPHATE 5-PHOSPHATASE 1			0.00296465	0.0302105			0.0136438
Solyc00g019750.1	black				0.0131333	0.0323807
Solyc00g024150.3	black	PTHR12599//PTHR12599:SF8 - PTERIN-4-ALPHA-CARBINOLAMINE DEHYDRATASE // SUBFAMILY NOT NAMED			2.38791e-33	1.67684e-57		5.4787e-76	1.30556e-37
Solyc00g145170.2	black	PF02428 - Potato type II proteinase inhibitor family (Prot_inhib_II)				0.000855576		0.0301059
Solyc01g005540.3	black	PTHR22594//PTHR22594:SF20 - ASPARTYL/LYSYL-TRNA SYNTHETASE // LYSINE--TRNA LIGASE			0.0403015	0.0104541		0.0464203
Solyc01g005620.3	black	PTHR24089//PTHR24089:SF266 - FAMILY NOT NAMED // MITOCHONDRIAL DICARBOXYLATE/TRICARBOXYLATE TRANSPORTER DTC			2.57086e-09	6.58135e-14		1.33716e-14	1.70026e-08
Solyc01g005830.3	black	PTHR32227//PTHR32227:SF48 - FAMILY NOT NAMED // GLUCAN ENDO-1,3-BETA-GLUCOSIDASE 4			2.98806e-07	2.9069e-06		6.5381e-06	6.69497e-08
Solyc01g005910.3	black	PTHR31446:SF2 - ACID PHOSPHATASE/VANADIUM-DEPENDENT HALOPEROXIDASE-RELATED PROTEIN			0.000175212	1.14438e-05		0.00047462	0.00412583
Solyc01g005990.3	black	PTHR33044:SF28 - BIFUNCTIONAL INHIBITOR/LIPID-TRANSFER PROTEIN/SEED STORAGE 2S ALBUMIN SUPERFAMILY PROTEIN			0.0194638	0.0300333			0.0440631
Solyc01g006140.3	black	K10727 - chromatin licensing and DNA replication factor 1 (CDT1)			0.0392161
Solyc01g006430.3	black	K10256 - omega-6 fatty acid desaturase (delta-12 desaturase) (FAD2)			5.28335e-08	5.88775e-05		9.25872e-10	1.76133e-11
Solyc01g006980.3	black	2.3.1.39 - [Acyl-carrier-protein] S-malonyltransferase / MCAT			0.00055064	0.00114515		0.0219223	0.00675532
Solyc01g007810.1	black	PF04844 - Transcriptional repressor, ovate (Ovate)			0.0374731			0.0076144	0.00271385
Solyc01g008240.3	black	PTHR23500:SF47 - SUGAR TRANSPORT PROTEIN 10-RELATED			4.16601e-09	5.39971e-08		3.10797e-06	7.66581e-08
Solyc01g008320.3	black	PTHR23509//PTHR23509:SF10 - FAMILY NOT NAMED // PHOSPHOLIPASE DDHD1			3.92369e-10	1.39913e-28		7.45236e-38	1.88861e-09
Solyc01g009040.3	black	PTHR10177:SF253 - CYCLIN-B1-4			0.0141547	0.000295962		0.0141096
Solyc01g009845.1	black	PF09784 - Mitochondrial ribosomal protein L31 (L31)							0.00584646
Solyc01g009990.3	black	PTHR11071//PTHR11071:SF11 - PEPTIDYL-PROLYL CIS-TRANS ISOMERASE // PEPTIDYL-PROLYL CIS-TRANS ISOMERASE C			1.28043e-14	3.96197e-17		1.63982e-34	4.91184e-17
Solyc01g014245.1	black					0.0435609
Solyc01g017220.1	black	K02114 - F-type H+-transporting ATPase subunit epsilon (ATPF1E, atpC)			3.14044e-06	0.000113225		2.24818e-05	8.07311e-07
Solyc01g017500.2	black				9.02779e-10	1.07181e-07		1.08298e-06	2.03457e-08
Solyc01g050020.2	black	K02704 - photosystem II CP47 chlorophyll apoprotein (psbB)			0.00171689	0.000618351		0.00525894	0.00565437
Solyc01g056780.3	black	PTHR14503//PTHR14503:SF3 - FAMILY NOT NAMED // 50S RIBOSOMAL PROTEIN L34, CHLOROPLASTIC			1.33808e-17	1.69786e-22		1.55515e-68	2.86618e-27
Solyc01g057830.3	black	K02945 - small subunit ribosomal protein S1 (RP-S1, rpsA)			5.10028e-25	2.07168e-35		7.65406e-80	2.32688e-31
Solyc01g065510.2	black				2.8723e-06	3.9165e-08		8.38939e-08	3.28979e-06
Solyc01g066900.3	black				0.0408902
Solyc01g067530.3	black	PTHR11702//PTHR11702:SF20 - DEVELOPMENTALLY REGULATED GTP-BINDING PROTEIN-RELATED // GTP-BINDING PROTEIN OBGC, CHLOROPLASTIC			0.000475004	0.00315932		8.83609e-07	2.17064e-05
Solyc01g067630.3	black	PTHR10366//PTHR10366:SF389 - NAD DEPENDENT EPIMERASE/DEHYDRATASE // SUBFAMILY NOT NAMED			3.71136e-15	1.25939e-13		6.04712e-18	9.04924e-17
Solyc01g067750.3	black	PTHR21089:SF1 - BIFUNCTIONAL 3-DEHYDROQUINATE DEHYDRATASE/SHIKIMATE DEHYDROGENASE, CHLOROPLASTIC			2.75483e-05	0.000479206		3.71256e-08	2.94493e-07
Solyc01g067890.3	black	2.2.1.7 - 1-deoxy-D-xylulose-5-phosphate synthase / DXP-synthase			3.61999e-09	1.09213e-10		3.59186e-14	1.04163e-10
Solyc01g067900.3	black	PTHR33136//PTHR33136:SF13 - FAMILY NOT NAMED // PROTEIN RALF-LIKE 22			0.00386483	0.00164846		0.00110812	0.00295675
Solyc01g068065.1	black	PTHR10969:SF25 - AUTOPHAGY-RELATED PROTEIN 8I			0.00589617	0.0176219		0.0384095	0.00452271
Solyc01g068590.3	black	PTHR23339//PTHR23339:SF54 - TYROSINE SPECIFIC PROTEIN PHOSPHATASE AND DUAL SPECIFICITY PROTEIN PHOSPHATASE // PALADIN			0.00079805	0.0114811			0.00108976
Solyc01g073870.3	black	PF03004 - Plant transposase (Ptta/En/Spm family) (Transposase_24)			0.0387252
Solyc01g079090.3	black	K00231 - oxygen-dependent protoporphyrinogen oxidase (PPOX, hemY)			1.84964e-08	6.47393e-19		5.83998e-31	6.78994e-09
Solyc01g079420.3	black	PTHR34372:SF2 - CYTOCHROME C OXIDASE SUBUNIT 5C-2-RELATED			0.00582303	0.0138926		0.000393739	3.34218e-06
Solyc01g079580.3	black	PTHR22904//PTHR22904:SF7 - TPR REPEAT CONTAINING PROTEIN // T14P4.7 PROTEIN			1.79686e-05	1.28402e-06		3.6922e-05	5.61424e-05
Solyc01g079790.3	black	PTHR22572//PTHR22572:SF119 - SUGAR-1-PHOSPHATE GUANYL TRANSFERASE // GLUCOSE-1-PHOSPHATE ADENYLYLTRANSFERASE LARGE SUBUNIT 1, CHLOROPLASTIC			6.86393e-14	1.49513e-20		2.80496e-29	3.1346e-16
Solyc01g079870.3	black	PTHR10252//PTHR10252:SF48 - HISTONE-LIKE TRANSCRIPTION FACTOR CCAAT-RELATED // NUCLEAR TRANSCRIPTION FACTOR Y SUBUNIT C-3-RELATED			0.0110816	0.00850407		0.00539118	0.00174305
Solyc01g080130.2	black				0.0129444
Solyc01g080280.3	black	PTHR20852//PTHR20852:SF53 - GLUTAMINE SYNTHETASE // GLUTAMINE SYNTHETASE, CHLOROPLASTIC/MITOCHONDRIAL			1.59198e-19	4.99038e-37		3.52815e-46	8.48291e-18
Solyc01g080310.3	black	PF01535//PF13041//PF13812 - PPR repeat (PPR) // PPR repeat family (PPR_2) // Pentatricopeptide repeat domain (PPR_3)			0.0358176
Solyc01g080600.3	black	K11253 - histone H3 (H3)			2.68631e-05	0.000361965		2.99857e-06	2.59158e-05
Solyc01g080810.3	black	PTHR11946:SF82 - ISOLEUCINE--TRNA LIGASE, MITOCHONDRIAL			4.03364e-09	3.08919e-09		2.59039e-10	1.87743e-09
Solyc01g086900.3	black	2.1.1.207 - tRNA (cytidine(34)-2'-O)-methyltransferase / tRNA methyltransferase L			0.000391061	0.000571318		7.91296e-06	7.40872e-05
Solyc01g087080.3	black					0.0133939
Solyc01g087210.3	black	PTHR13301//PTHR13301:SF64 - X-BOX TRANSCRIPTION FACTOR-RELATED // SUBFAMILY NOT NAMED			0.013167	0.00583437		0.00266286	0.00376617
Solyc01g087290.3	black	K05539 - tRNA-dihydrouridine synthase A [EC:1.-.-.-] (dusA)			3.60116e-07	2.41601e-08		3.58891e-07	3.84927e-06
Solyc01g087500.3	black	K03164 - DNA topoisomerase II [EC:5.99.1.3] (TOP2)			0.000244713	1.45858e-08		1.38868e-06	0.0015691
Solyc01g087520.3	black	PTHR10949//PTHR10949:SF11 - LIPOYL SYNTHASE // SUBFAMILY NOT NAMED			6.14937e-13	5.15537e-11		4.73382e-09	3.16571e-12
Solyc01g087730.3	black	K02863 - large subunit ribosomal protein L1 (RP-L1, MRPL1, rplA)			1.42532e-18	6.45062e-26		1.66649e-46	2.45135e-20
Solyc01g087750.3	black	PF11891 - Domain of unknown function (DUF3411) (DUF3411)			9.01729e-21	5.8655e-39		6.61522e-37	9.08235e-19
Solyc01g087970.3	black	PTHR11802:SF66 - SERINE CARBOXYPEPTIDASE-LIKE 36-RELATED			0.0112862			0.0426813	0.00311569
Solyc01g088480.3	black	2.7.4.14//2.7.4.22//2.7.4.25 - UMP/CMP kinase / Uridine monophosphate-cytidine monophosphate phosphotransferase // UMP kinase / Uridylate kinase // (d)CMP kinase / Deoxycytidylate kinase			0.00292548	0.0251506			0.011533
Solyc01g088505.1	black	PTHR11566//PTHR11566:SF80 - DYNAMIN // DYNAMIN-RELATED PROTEIN 1C			0.000319844	0.00526069		0.00574821	0.00301734
Solyc01g088530.2	black				0.000993999	0.00102769		0.0347358	0.0170811
Solyc01g088610.3	black	PTHR10772//PTHR10772:SF13 - 10 KDA HEAT SHOCK PROTEIN // CHLOROPLAST CHAPERONIN 10			3.46384e-07	3.50243e-08		5.55594e-35	6.79792e-13
Solyc01g090200.3	black	K14164 - glycyl-tRNA synthetase (glyQS)			0.000111151	5.53338e-07		6.60707e-06	0.000770686
Solyc01g090970.3	black	PF14547 - Hydrophobic seed protein (Hydrophob_seed)			5.23001e-06	2.43236e-07		1.57808e-13	1.83015e-06
Solyc01g091530.3	black	PTHR32382:SF5 - FASCICLIN-LIKE ARABINOGALACTAN PROTEIN 10-RELATED			1.44505e-14	3.74254e-13		3.44034e-15	3.66241e-18
Solyc01g091700.3	black	PTHR31960:SF3 - F-BOX PROTEIN PP2-A13							0.0139085
Solyc01g091800.3	black	2.1.1.182 - 16S rRNA (adenine(1518)-N(6)/adenine(1519)-N(6))-dimethyltransferase			2.58504e-06	3.7515e-06		0.000398773	5.61424e-05
Solyc01g094460.3	black	PTHR31500:SF10 - AT HOOK MOTIF DNA-BINDING FAMILY PROTEIN			0.049899	0.0400331			0.0463494
Solyc01g094790.3	black	K13034 - L-3-cyanoalanine synthase/ cysteine synthase (ATCYSC1)			0.0280762			0.000449163	0.0151401
Solyc01g095280.3	black	PTHR10460 - ABL INTERACTOR							0.0466932
Solyc01g095400.3	black	PF00651//PF07707 - BTB/POZ domain (BTB) // BTB And C-terminal Kelch (BACK)				0.0379823		0.025464	0.0345559
Solyc01g095500.3	black	PTHR31194//PTHR31194:SF0 - SHN SHINE , DNA BINDING / TRANSCRIPTION FACTOR // ETHYLENE-RESPONSIVE TRANSCRIPTION FACTOR CRF3-RELATED			0.0477961
Solyc01g095690.2	black	PF01535//PF13041//PF14432 - PPR repeat (PPR) // PPR repeat family (PPR_2) // DYW family of nucleic acid deaminases (DYW_deaminase)			0.0233511
Solyc01g096240.3	black	PF13301 - Protein of unknown function (DUF4079) (DUF4079)			0.0154487				0.00156709
Solyc01g096870.3	black	PTHR11451//PTHR11451:SF6 - TRNA SYNTHETASE-RELATED // SUBFAMILY NOT NAMED	0.0463342		1.84183e-06	6.73004e-18		2.77899e-17	4.15226e-05
Solyc01g096880.3	black	PTHR11654//PTHR11654:SF120 - OLIGOPEPTIDE TRANSPORTER-RELATED // SUBFAMILY NOT NAMED			9.7523e-06	2.7301e-06		5.4522e-05	5.46103e-05
Solyc01g096890.3	black								0.00586753
Solyc01g097250.3	black	PF12776 - Myb/SANT-like DNA-binding domain (Myb_DNA-bind_3)			0.0481917
Solyc01g097290.3	black	PTHR31734//PTHR31734:SF28 - FAMILY NOT NAMED // AUXIN-RESPONSIVE PROTEIN IAA16			0.000472546	0.00601392		0.013246	0.000967221
Solyc01g097310.3	black	K03116 - sec-independent protein translocase protein TatA (tatA)			0.0209948	0.00447215
Solyc01g097460.3	black	PTHR11934:SF0 - RIBOSE-5-PHOSPHATE ISOMERASE			2.03807e-44	3.23083e-80		8.78573e-118	5.82868e-43
Solyc01g097860.3	black	PF07466 - Protein of unknown function (DUF1517) (DUF1517)			0.000116803	2.72166e-10		5.05899e-10	0.000199288
Solyc01g098570.2	black	PF11250 - Fantastic Four meristem regulator (FAF)			0.00370247	0.00486383
Solyc01g099020.3	black	2.3.1.98 - Chlorogenate--glucarate O-hydroxycinnamoyltransferase			6.76553e-24	6.38297e-66		3.20053e-80	6.66289e-23
Solyc01g099220.3	black	K02350 - DNA polymerase zeta (POLZ1, rev3)			0.0106814	0.0184634		0.0269936	0.0139979
Solyc01g099560.3	black	K15095 - (+)-neomenthol dehydrogenase (E1.1.1.208)				0.0166109		0.0220962
Solyc01g099590.3	black	PTHR11260//PTHR11260:SF254 - GLUTATHIONE S-TRANSFERASE, GST, SUPERFAMILY, GST DOMAIN CONTAINING // GLUTATHIONE S-TRANSFERASE U8				0.02296
Solyc01g099690.3	black	PTHR10381:SF6 - ATP-DEPENDENT CLP PROTEASE PROTEOLYTIC SUBUNIT-RELATED PROTEIN 3, CHLOROPLASTIC			0.00324032	0.0271518		0.0017332	0.000134953
Solyc01g099770.3	black	PTHR11991 - TRANSLATIONALLY CONTROLLED TUMOR PROTEIN-RELATED			0.0106449				0.0399652
Solyc01g099840.3	black	PTHR33565//PTHR33565:SF1 - FAMILY NOT NAMED // DORMANCY/AUXIN ASSOCIATED PROTEIN			1.14628e-17	1.39338e-45		9.45075e-57	2.89385e-16
Solyc01g100270.3	black	PTHR13620:SF15 - EXONUCLEASE MUT-7 HOMOLOG-RELATED			0.0488919
Solyc01g100520.3	black	PTHR10381//PTHR10381:SF12 - ATP-DEPENDENT CLP PROTEASE PROTEOLYTIC SUBUNIT // ATP-DEPENDENT CLP PROTEASE PROTEOLYTIC SUBUNIT 5, CHLOROPLASTIC			0.0106448	6.47109e-05		0.00265779
Solyc01g102330.3	black	3.1.1.72 - Acetylxylan esterase			0.000209334	0.00364428		0.00314942	0.000233808
Solyc01g103100.3	black	1.1.1.100 - 3-oxoacyl-[acyl-carrier-protein] reductase			1.01933e-22	2.7989e-31		1.18298e-47	1.33993e-22
Solyc01g103450.3	black	PTHR19375//PTHR19375:SF147 - HEAT SHOCK PROTEIN 70KDA // SUBFAMILY NOT NAMED		0.020156	4.78173e-05	0.000352874		3.90303e-12	2.03842e-13
Solyc01g103453.1	black				5.49063e-08	1.85374e-10		3.28862e-24	3.97682e-10
Solyc01g103960.3	black	PTHR13710:SF94 - ATP-DEPENDENT DNA HELICASE RECQ FAMILY PROTEIN			0.0277548
Solyc01g104170.3	black	PTHR24193//PTHR24193:SF90 - ANKYRIN REPEAT PROTEIN // SUBFAMILY NOT NAMED			2.49495e-06	5.71277e-05		6.83227e-07	2.13509e-07
Solyc01g104270.3	black	PF11891 - Domain of unknown function (DUF3411) (DUF3411)			0.00015334	3.2055e-06		3.52204e-06	0.000874755
Solyc01g104550.3	black	PF03106 - WRKY DNA -binding domain (WRKY)				0.0497477
Solyc01g104775.1	black	PTHR11937//PTHR11937:SF247 - ACTIN // SUBFAMILY NOT NAMED			0.00363874	0.0261457		0.00346056	0.00112438
Solyc01g105165.1	black	3.6.3.4//3.6.3.54 - Cu(2+)-exporting ATPase // Cu(+) exporting ATPase			0.0199559	0.0400464
Solyc01g105460.3	black	2.5.1.74 - 1,4-dihydroxy-2-naphthoate polyprenyltransferase			5.22523e-05	5.15367e-05		0.00010842	0.000436601
Solyc01g105710.3	black	PTHR10516//PTHR10516:SF214 - PEPTIDYL-PROLYL CIS-TRANS ISOMERASE // PEPTIDYL-PROLYL CIS-TRANS ISOMERASE FKBP12			0.0153278	0.000137565		3.69348e-07	0.00716827
Solyc01g105890.3	black	4.2.3.26 - R-linalool synthase / (3R)-linalool synthase						0.0357624
Solyc01g106090.3	black	PF01789 - PsbP (PsbP)				0.0151793		0.00836063	0.028209
Solyc01g106330.3	black	3.5.1.60//3.5.1.99 - N-(long-chain-acyl)ethanolamine deacylase / N-acylethanolamine amidohydrolase // Fatty acid amide hydrolase / Oleamide hydrolase			0.000900597	0.00879679			0.0137824
Solyc01g106375.1	black				1.74452e-05	0.000146017		0.00338041	0.000758304
Solyc01g106430.3	black	PTHR10286:SF3 - INORGANIC PYROPHOSPHATASE			1.02145e-11	1.55678e-30		7.46911e-25	1.28474e-09
Solyc01g106740.3	black	PTHR22594//PTHR22594:SF5 - ASPARTYL/LYSYL-TRNA SYNTHETASE // ASPARTATE--TRNA LIGASE, MITOCHONDRIAL			0.00203204	0.00247327		0.000601915	0.00094295
Solyc01g106750.2	black				0.00419932	0.000635139		0.0229838	0.0265474
Solyc01g107660.3	black	PTHR14154//PTHR14154:SF18 - UPF0041 BRAIN PROTEIN 44-RELATED // SUBFAMILY NOT NAMED			3.75673e-11	1.91548e-11		4.42962e-11	6.07603e-10
Solyc01g108400.3	black	PTHR24349//PTHR24349:SF115 - SERINE/THREONINE-PROTEIN KINASE // SUBFAMILY NOT NAMED			0.0131811	0.0319178
Solyc01g108460.2	black					0.0109242		0.0148814
Solyc01g108600.3	black	K06972 - uncharacterized protein (K06972)			0.00476268	0.037185		0.0132525	0.00431773
Solyc01g108670.3	black	PTHR24115//PTHR24115:SF506 - FAMILY NOT NAMED // PHRAGMOPLAST ORIENTING KINESIN 2			0.0146608	0.0145837
Solyc01g108900.3	black	PF08263 - Leucine rich repeat N-terminal domain (LRRNT_2)			0.0207532				0.0358437
Solyc01g109040.3	black	PF08041 - PetM family of cytochrome b6f complex subunit 7 (PetM)			3.02368e-09	7.71981e-11		4.68255e-21	8.26665e-11
Solyc01g109690.1	black	PTHR24078:SF177 - PROTEIN DNJ-23-RELATED			0.00210563	0.00795449		0.0129824	0.00415218
Solyc01g109930.3	black	3.1.3.15//3.1.3.25//3.1.3.93 - Histidinol-phosphatase // Inositol-phosphate phosphatase / Myo-inositol-1-phosphatase // L-galactose 1-phosphate phosphatase				0.0309642
Solyc01g110120.3	black	PTHR11629//PTHR11629:SF69 - VACUOLAR PROTON ATPASES // SUBFAMILY NOT NAMED			0.000437318	1.80073e-11		3.44587e-09	0.00718433
Solyc01g110270.3	black	PTHR31846//PTHR31846:SF14 - FAMILY NOT NAMED // RNA-BINDING CRS1 / YHBY (CRM) DOMAIN PROTEIN			0.00109232	0.0136233			0.00771164
Solyc01g110670.3	black	K14488 - SAUR family protein (SAUR)			1.45069e-05	0.0003168		1.60676e-07	6.16564e-07
Solyc01g110920.3	black	K14488 - SAUR family protein (SAUR)			0.00119274	0.0104999		0.0222094	0.0180125
Solyc01g110940.3	black	K14488 - SAUR family protein (SAUR)			0.00293438	0.0167696		0.046573	0.00862189
Solyc01g111145.1	black	PF01190 - Pollen proteins Ole e I like (Pollen_Ole_e_I)			0.00107553	0.00360574		3.40513e-07	6.03337e-07
Solyc01g111510.3	black	PTHR31356//PTHR31356:SF9 - FAMILY NOT NAMED // L-ASCORBATE PEROXIDASE 3, PEROXISOMAL			1.21312e-11	4.88769e-10		8.45365e-07	3.52771e-09
Solyc01g111990.3	black	PTHR11777:SF14 - ALANINE--TRNA LIGASE, CHLOROPLASTIC-RELATED			1.51209e-10	2.12148e-10		3.06782e-12	2.64037e-08
Solyc01g112160.3	black	PTHR23029//PTHR23029:SF36 - PHOSPHOGLYCERATE MUTASE // PHOSPHOGLYCERATE MUTASE-LIKE PROTEIN			0.000119938	0.000115636		0.00799969	0.00219866
Solyc01g112290.3	black	PTHR11451//PTHR11451:SF41 - TRNA SYNTHETASE-RELATED // GLUTAMATE--TRNA LIGASE, MITOCHONDRIAL-RELATED			2.0373e-05	0.000497278		0.000697543	1.14676e-05
Solyc02g005200.3	black	PTHR34556:SF2 - F17A17.35 PROTEIN			1.12049e-10	7.64424e-15		5.11204e-26	8.6727e-09
Solyc02g012000.1	black	PTHR15184:SF42 - ATP SYNTHASE SUBUNIT ALPHA, CHLOROPLASTIC			0.000889999	0.0152832			0.0157155
Solyc02g014150.3	black	PTHR32010:SF6 - PHOTOSYSTEM II STABILITY/ASSEMBLY FACTOR HCF136, CHLOROPLASTIC			2.54474e-13	6.69483e-19		3.5057e-22	6.89201e-14
Solyc02g021000.3	black	PTHR33219//PTHR33219:SF1 - FAMILY NOT NAMED // COFACTOR ASSEMBLY, COMPLEX C (B6F)	0.040401		0.00168009	1.24391e-06		5.96605e-06	0.00524869
Solyc02g021140.3	black	PTHR11404//PTHR11404:SF17 - SUPEROXIDE DISMUTASE 2 // SUPEROXIDE DISMUTASE [FE] 3, CHLOROPLASTIC			0.0186432	0.00593873		0.00094608	0.0245784
Solyc02g021430.1	black	PTHR13068:SF6 - MITOCHONDRIAL TRANSCRIPTION TERMINATION FACTOR FAMILY PROTEIN			0.00048579	0.00111079		0.0106658	0.00240017
Solyc02g022900.3	black				0.00118852	0.000204649		0.000176121	0.000403084
Solyc02g032970.3	black	PTHR23076//PTHR23076:SF58 - METALLOPROTEASE M41 FTSH // FTSH EXTRACELLULAR PROTEASE FAMILY PROTEIN			2.53413e-05	5.07644e-06		4.04663e-12	6.53503e-07
Solyc02g038690.1	black	K11252 - histone H2B (H2B)			0.00787776	0.001336		0.00206345	0.00797378
Solyc02g055440.3	black	PF02620 - Uncharacterized ACR, COG1399 (DUF177)			4.35723e-09	8.38105e-13		1.13869e-10	5.54657e-08
Solyc02g061820.3	black	KOG0512 - Fetal globin-inducing factor (contains ankyrin repeats)			0.0347987
Solyc02g062020.3	black	PTHR24072:SF179 - RAC-LIKE GTP-BINDING PROTEIN ARAC1-RELATED			0.0427476	0.0100296
Solyc02g062560.3	black	PF09370 - Phosphoenolpyruvate hydrolase-like (PEP_hydrolase)				0.0363577		0.00841306
Solyc02g063075.1	black	K08505 - protein transport protein SFT1 (SFT1)			4.1006e-11	1.68171e-10		2.0322e-08	6.68022e-10
Solyc02g063150.3	black	K01602 - ribulose-bisphosphate carboxylase small chain (rbcS)			1.145e-16	6.92823e-35		5.49901e-59	6.72975e-17
Solyc02g063380.1	black				0.00307586	0.0248398			0.00443217
Solyc02g065400.3	black	K02716 - photosystem II oxygen-evolving enhancer protein 1 (psbO)			4.02674e-10	4.24601e-21		9.76839e-30	7.43793e-10
Solyc02g067100.3	black	PTHR14326//PTHR14326:SF18 - TARGETING PROTEIN FOR XKLP2 // SUBFAMILY NOT NAMED			0.0101236	0.00595062
Solyc02g067340.3	black	PTHR10641//PTHR10641:SF491 - MYB-LIKE DNA-BINDING PROTEIN MYB // MYB TRANSCRIPTION FACTOR			0.00114572	0.00346443		0.00333254	0.000591179
Solyc02g067490.3	black	PTHR31205:SF2 - ACTIN CROSS-LINKING PROTEIN			0.00126662	0.0202968		0.0422777	0.000768549
Solyc02g068090.3	black	PTHR21109:SF0 - 28S RIBOSOMAL PROTEIN S21, MITOCHONDRIAL			1.02051e-16	9.19704e-24		3.35708e-52	2.37288e-23
Solyc02g068140.3	black	PTHR21576//PTHR21576:SF44 - UNCHARACTERIZED NODULIN-LIKE PROTEIN // MAJOR FACILITATOR PROTEIN			0.00374475	0.0233438			0.0498211
Solyc02g069060.3	black	PTHR32278//PTHR32278:SF8 - FAMILY NOT NAMED // PHLOEM PROTEIN 2-A10-RELATED			0.0091006	0.0120873			0.031775
Solyc02g069140.2	black	5.2.1.8//6.1.1.4 - Peptidylprolyl isomerase / Rotamase // Leucine--tRNA ligase / Leucyl-tRNA synthetase			0.00110007	0.0138059			0.0149587
Solyc02g069455.1	black				0.00132442	4.60505e-06		1.58351e-06	0.00183334
Solyc02g069620.3	black	PTHR11934//PTHR11934:SF8 - RIBOSE-5-PHOSPHATE ISOMERASE // RIBOSE-5-PHOSPHATE ISOMERASE 4, CHLOROPLASTIC-RELATED			6.46947e-20	7.25543e-25		5.30351e-27	9.50916e-18
Solyc02g069680.3	black	PTHR10476//PTHR10476:SF8 - CHARGED MULTIVESICULAR BODY PROTEIN // VACUOLAR PROTEIN SORTING-ASSOCIATED PROTEIN 2 HOMOLOG 2			0.0034148	0.0121546			0.0277968
Solyc02g070500.1	black	PF04398 - Protein of unknown function, DUF538 (DUF538)			0.000396951	4.64137e-08		5.59164e-07	0.00197395
Solyc02g070910.2	black				0.024917	0.0252571
Solyc02g070935.1	black				6.22528e-07	5.21938e-14		9.62716e-20	2.2385e-07
Solyc02g071020.3	black				9.47714e-08	3.50995e-09		5.42501e-13	3.26158e-07
Solyc02g071610.3	black	PTHR22835//PTHR22835:SF238 - ZINC FINGER FYVE DOMAIN CONTAINING PROTEIN // SUBFAMILY NOT NAMED			9.05827e-07	6.31199e-14		8.64825e-16	5.18366e-06
Solyc02g071890.3	black	1.1.1.23 - Histidinol dehydrogenase			1.57739e-06	3.90235e-06		1.89916e-06	2.3562e-06
Solyc02g076870.3	black	PTHR12482:SF11 - HYDROLASE-LIKE PROTEIN			0.00896913
Solyc02g077130.2	black	PTHR22835//PTHR22835:SF189 - ZINC FINGER FYVE DOMAIN CONTAINING PROTEIN // SUBFAMILY NOT NAMED			0.00510672	0.0192279			0.0282648
Solyc02g077160.3	black	3.1.1.32 - Phospholipase A(1) / Phospholipase A1			0.0474051
Solyc02g077440.3	black	PF05129 - Transcription elongation factor Elf1 like (Elf1)							0.00183334
Solyc02g078010.3	black	PTHR22847//PTHR22847:SF502 - WD40 REPEAT PROTEIN // WD40 REPEAT PROTEIN MUCILAGE-MODIFIED 1			7.69008e-16	5.38891e-11		1.23004e-11	1.62286e-16
Solyc02g078500.2	black	PTHR11772//PTHR11772:SF15 - ASPARAGINE SYNTHETASE // SUBFAMILY NOT NAMED			0.0199183	0.00206518		0.0304885
Solyc02g078515.1	black	PTHR35130:SF1 - MEDIATOR OF RNA POLYMERASE II TRANSCRIPTION SUBUNIT 16			0.0179122				0.0360528
Solyc02g078760.1	black				0.00316433	0.000683711		0.0152755	0.0278653
Solyc02g078805.1	black	K18643 - katanin p80 WD40 repeat-containing subunit B1 (KATNB1)			2.86615e-06	1.383e-05		4.79297e-05	0.000144628
Solyc02g079000.3	black	PTHR23076:SF44 - ATP-DEPENDENT ZINC METALLOPROTEASE FTSH 12, CHLOROPLASTIC			0.00971501	6.80515e-05		7.51905e-07	0.00936632
Solyc02g079010.3	black	PTHR33098:SF10 - T28P6.11 PROTEIN			0.00385354	0.0303629			0.0244757
Solyc02g080200.3	black	3.2.2.22 - rRNA N-glycosylase / rRNA N-glycosidase				0.00687942		0.0207764
Solyc02g080330.3	black	PTHR24298//PTHR24298:SF54 - FAMILY NOT NAMED // CYTOCHROME P450 LIKE PROTEIN			0.0115127	0.0298206		0.00116888	0.000139717
Solyc02g080540.1	black	K02115 - F-type H+-transporting ATPase subunit gamma (ATPF1G, atpG)			2.84704e-11	7.25609e-09		2.96387e-12	4.02765e-13
Solyc02g080990.2	black	K01869 - leucyl-tRNA synthetase (LARS, leuS)			1.73653e-05	1.96799e-07		5.12626e-08	0.000252609
Solyc02g081440.3	black	PF01124 - MAPEG family (MAPEG)			0.000810401	0.000226599		0.00126213	0.00250957
Solyc02g082435.1	black				0.00838894	0.02848
Solyc02g082540.3	black	KOG0998 - Synaptic vesicle protein EHS-1 and related EH domain proteins			0.0189508	0.0132083
Solyc02g082830.2	black	2.6.1.52 - Phosphoserine transaminase / PSAT		0.0486272	0.0249907			0.00146252	0.000196634
Solyc02g082930.3	black	PTHR22595//PTHR22595:SF34 - CHITINASE-RELATED // BASIC ENDOCHITINASE B	0.027024			0.00539025
Solyc02g083270.3	black				0.0476005				0.00872592
Solyc02g083410.3	black	2.7.11.1 - Non-specific serine/threonine protein kinase / Threonine-specific protein kinase			0.00387329	0.0067548			0.0343899
Solyc02g083450.3	black	PTHR13683//PTHR13683:SF232 - ASPARTYL PROTEASES // ASPARTYL PROTEASE FAMILY PROTEIN			0.0179038				0.0314687
Solyc02g084750.3	black	2.8.4.3 - tRNA-2-methylthio-N(6)-dimethylallyladenosine synthase / tRNA-i6A37 methylthiotransferase			0.000507492	0.000317187		0.000128717	0.000299691
Solyc02g084930.3	black	KOG0157 - Cytochrome P450 CYP4/CYP19/CYP26 subfamilies			0.0106772	0.00167635
Solyc02g085025.1	black					0.0155164
Solyc02g085700.2	black				0.000247938	0.00285202		0.00084333	6.71324e-05
Solyc02g085935.1	black	PTHR13166//PTHR13166:SF4 - PROTEIN C6ORF149 // SUBFAMILY NOT NAMED	0.0462875
Solyc02g085950.3	black	K01602 - ribulose-bisphosphate carboxylase small chain (rbcS)			1.17626e-05				5.95306e-12
Solyc02g086080.3	black	PTHR10992//PTHR10992:SF733 - ALPHA/BETA HYDROLASE FOLD-CONTAINING PROTEIN // ABHYDROLASE DOMAIN-CONTAINING PROTEIN 8						0.0285975
Solyc02g086250.3	black				0.0114898	0.000974768		0.0135806
Solyc02g086730.2	black	K02935 - large subunit ribosomal protein L7/L12 (RP-L7, MRPL12, rplL)			2.14016e-21	7.08421e-27		2.567e-38	2.56854e-22
Solyc02g086850.2	black	PTHR12801:SF56 - EXONUCLEASE FAMILY PROTEIN	0.0207059			0.00506178
Solyc02g086890.3	black				5.01907e-05	6.08029e-05		4.55613e-06	0.000146003
Solyc02g086910.3	black	PTHR11071:SF236 - PEPTIDYL-PROLYL CIS-TRANS ISOMERASE CYP38, CHLOROPLASTIC			1.2359e-14	1.56356e-20		1.3049e-46	2.5635e-17
Solyc02g087150.3	black				2.54517e-05	0.000498199		2.3575e-08	1.66016e-05
Solyc02g087190.1	black	PTHR31517:SF11 - PEROXIDASE 31-RELATED						0.00165077	0.0478702
Solyc02g087200.1	black	PTHR23315//PTHR23315:SF127 - BETA CATENIN-RELATED ARMADILLO REPEAT-CONTAINING // U-BOX DOMAIN-CONTAINING PROTEIN 40			0.0159772	0.0139662		0.0316787	0.0135104
Solyc02g088260.3	black	PTHR33971:SF1 - GENOMIC DNA, CHROMOSOME 3, P1 CLONE:MRI12			0.0419865
Solyc02g088350.3	black	PF12204 - Domain of unknown function (DUF3598) (DUF3598)			1.60189e-13	3.45152e-11		4.48948e-08	6.17297e-11
Solyc02g089075.1	black	PTHR39112:SF1 - PROTEIN RALF-LIKE 27			6.36391e-15	1.20262e-14		1.40352e-13	8.02116e-14
Solyc02g089150.3	black	PTHR13593:SF46 - F21F23.12 PROTEIN			0.0180396				0.00657813
Solyc02g089410.3	black	PTHR22763:SF5 - E3 UBIQUITIN-PROTEIN LIGASE CIP8							0.0166218
Solyc02g089880.3	black	PTHR13778:SF15 - GALACTURONOSYLTRANSFERASE-LIKE 2-RELATED				0.0334371
Solyc02g090070.3	black	PF03000 - NPH3 family (NPH3)			0.0341992
Solyc02g090315.1	black	KOG4493 - Uncharacterized conserved protein							0.0313876
Solyc02g091280.3	black	PTHR10381:SF20 - ATP-DEPENDENT CLP PROTEASE PROTEOLYTIC SUBUNIT 3, CHLOROPLASTIC			0.00158469	0.000759629		0.000235358	0.00243963
Solyc02g091525.1	black	PTHR10343//PTHR10343:SF61 - 5'-AMP-ACTIVATED PROTEIN KINASE , BETA SUBUNIT // STARCH BINDING SCAFFOLD PROTEIN-RELATED							0.0287936
Solyc02g091580.3	black	3.4.24.70 - Oligopeptidase A			0.000118172	0.00154518		0.0023166	0.000281973
Solyc02g091920.3	black	PTHR31062//PTHR31062:SF48 - FAMILY NOT NAMED // XYLOGLUCAN ENDOTRANSGLUCOSYLASE/HYDROLASE PROTEIN 6-RELATED			3.49772e-10	9.78284e-12		2.92909e-28	1.30485e-15
Solyc02g092110.3	black	PTHR33285//PTHR33285:SF1 - FAMILY NOT NAMED // GROWTH FACTOR PROTEIN-RELATED			7.96467e-30	1.99842e-26		3.40067e-30	1.7753e-31
Solyc02g092300.1	black	K02935 - large subunit ribosomal protein L7/L12 (RP-L7, MRPL12, rplL)					0.00943847	0.018273
Solyc02g092530.3	black	3.5.1.49 - Formamidase / Formamide amidohydrolase	0.0344301		0.00807944	1.88544e-05		0.00203325
Solyc02g092560.3	black	PF00651//PF03000 - BTB/POZ domain (BTB) // NPH3 family (NPH3)			0.000133928	3.89482e-05		0.0053812	0.00272965
Solyc02g093440.3	black	2.7.1.43 - Glucuronokinase						0.0190021	0.00483076
Solyc02g094060.3	black	PTHR11689//PTHR11689:SF67 - CHLORIDE CHANNEL // CHLORIDE CHANNEL PROTEIN CLC-A-RELATED			0.0112757	0.00258007
Solyc02g094485.1	black	PTHR23029:SF39 - GENOMIC DNA, CHROMOSOME 3, P1 CLONE: MDJ14						0.00985012
Solyc02g094520.3	black	PTHR22884//PTHR22884:SF352 - SET DOMAIN PROTEINS // HISTONE-LYSINE N-METHYLTRANSFERASE, H3 LYSINE-9 SPECIFIC SUVH4			0.0442316
Solyc03g005730.3	black	K01703 - 3-isopropylmalate/(R)-2-methylmalate dehydratase large subunit (leuC)			2.60701e-06	2.95053e-07		4.65041e-05	8.3978e-05
Solyc03g005775.1	black	PTHR21649 - CHLOROPHYLL A/B BINDING PROTEIN			5.20575e-06	1.74138e-05		1.02614e-07	2.29631e-07
Solyc03g006050.3	black	PTHR27000//PTHR27000:SF131 - FAMILY NOT NAMED // RECEPTOR LIKE PROTEIN 55						0.00660304	0.00422285
Solyc03g006250.3	black				0.0486345
Solyc03g006540.3	black				1.52447e-09	8.74842e-08		7.22499e-06	4.08612e-08
Solyc03g006710.1	black	PTHR10891//PTHR10891:SF585 - EF-HAND CALCIUM-BINDING DOMAIN CONTAINING PROTEIN // SUBFAMILY NOT NAMED	0.000259714			0.000335887	0.00662948	0.00848695
Solyc03g006970.1	black	PTHR10795//PTHR10795:SF322 - PROPROTEIN CONVERTASE SUBTILISIN/KEXIN // SUBTILISIN SERINE PROTEASE-RELATED			0.00313483	0.0351901		0.00547397	2.55714e-05
Solyc03g006980.3	black	K01206 - alpha-L-fucosidase (FUCA)	0.0317868			0.00309929	0.0221898	0.00431392
Solyc03g007130.3	black	PTHR19321:SF7 - 65-KDA MICROTUBULE-ASSOCIATED PROTEIN 3-RELATED			3.87041e-05	0.0011679		0.00748647	0.000283873
Solyc03g007690.1	black	PTHR19241:SF290 - ABC TRANSPORTER G FAMILY MEMBER 4-RELATED			3.82354e-05	0.000928993		0.000317658	9.7322e-06
Solyc03g007980.1	black	K03609 - septum site-determining protein MinD (minD)			0.000632074	0.000400114		0.000501081	0.000697508
Solyc03g019940.3	black	PTHR22594:SF6 - ASPARAGINE--TRNA LIGASE, MITOCHONDRIAL			1.58688e-07	1.0203e-09		9.77057e-11	6.84398e-06
Solyc03g026200.3	black	PF11152 - Protein of unknown function (DUF2930) (DUF2930)			0.0308746
Solyc03g031590.3	black	PF03595 - Voltage-dependent anion channel (SLAC1)				0.0314563
Solyc03g032190.3	black	PTHR10177:SF250 - CYCLIN-B2-3-RELATED				0.0190952
Solyc03g033280.1	black				0.0267562
Solyc03g034180.3	black	K06630 - 14-3-3 protein epsilon (YWHAE)							0.0482849
Solyc03g034190.3	black	K19032 - 30S ribosomal protein 3 (PSRP3)			5.18826e-19	1.11962e-39		7.77355e-42	3.9257e-17
Solyc03g034220.3	black	K01602 - ribulose-bisphosphate carboxylase small chain (rbcS)			7.71988e-41	6.40215e-46		2.3725e-83	4.69184e-48
Solyc03g034400.3	black	PTHR11206//PTHR11206:SF129 - MULTIDRUG RESISTANCE PROTEIN // SUBFAMILY NOT NAMED			9.05827e-07	7.52308e-12		7.11422e-09	2.05873e-05
Solyc03g044330.1	black	K01652 - acetolactate synthase I/II/III large subunit (E2.2.1.6L, ilvB, ilvG, ilvI)			3.08646e-11	2.92915e-09		2.05648e-08	1.76185e-09
Solyc03g051810.3	black	PTHR11048//PTHR11048:SF24 - PRENYLTRANSFERASES // SUBFAMILY NOT NAMED			1.145e-16	2.66054e-25		2.6293e-25	1.53807e-14
Solyc03g053023.1	black					0.0253174
Solyc03g058190.3	black	PTHR23115:SF165 - TYPA-LIKE TRANSLATION ELONGATION FACTOR SVR3-RELATED			6.26483e-11	7.58738e-18		1.43511e-16	1.0485e-10
Solyc03g058860.3	black	1.4.1.24 - 3-dehydroquinate synthase II / DHQ synthase II			7.46566e-09	1.51299e-09		1.22195e-09	3.72958e-07
Solyc03g058990.2	black	PTHR10965 - 60S RIBOSOMAL PROTEIN L38			0.000115989	0.000299528		0.0136842	0.00234024
Solyc03g060510.3	black	PF05684 - Protein of unknown function (DUF819) (DUF819)			3.40175e-07	1.49168e-07		2.79533e-05	2.14321e-05
Solyc03g062700.3	black	PTHR12794//PTHR12794:SF2 - GEMIN2 // ARM REPEAT SUPERFAMILY PROTEIN			0.0108395	0.0433983
Solyc03g062790.3	black	PF04755 - PAP_fibrillin (PAP_fibrillin)			1.63527e-05	1.00334e-07		4.21784e-05	0.000206207
Solyc03g062890.3	black	PTHR10003//PTHR10003:SF31 - SUPEROXIDE DISMUTASE CU-ZN -RELATED // SUPEROXIDE DISMUTASE [CU-ZN] 3						0.0345438
Solyc03g063057.1	black	PTHR33787//PTHR33787:SF4 - FAMILY NOT NAMED // YCF20-LIKE PROTEIN				0.0448819
Solyc03g071590.3	black	1.1.1.82 - Malate dehydrogenase (NADP(+)) / NADP-linked malate dehydrogenase			4.56469e-20	2.23915e-23		6.84643e-41	1.47993e-22
Solyc03g078080.3	black	K09903 - uridylate kinase (pyrH)			0.000900597	1.38821e-05		4.14422e-09	0.00011948
Solyc03g078640.1	black				8.8246e-06	5.92294e-06		5.51146e-05	0.000232078
Solyc03g080040.1	black	PTHR34376//PTHR34376:SF2 - FAMILY NOT NAMED // SERINE PROTEASE INHIBITOR, KAZAL-TYPE FAMILY PROTEIN				0.000444069		0.000991413
Solyc03g080120.1	black				5.65378e-06	1.8533e-06		6.87582e-06	1.86549e-05
Solyc03g081320.3	black	PTHR19308//PTHR19308:SF12 - PHOSPHATIDYLCHOLINE TRANSFER PROTEIN // SUBFAMILY NOT NAMED			1.00459e-05	4.48447e-08		1.60606e-07	6.03879e-05
Solyc03g082510.1	black	K14488 - SAUR family protein (SAUR)			0.00169347	0.0199601		0.00052492	0.000984922
Solyc03g082890.3	black	PTHR14136:SF11 - THYLAKOID LUMENAL 17.4 KDA PROTEIN, CHLOROPLASTIC			2.92243e-05	0.000399597		4.23241e-06	3.42124e-05
Solyc03g082950.3	black					0.0184561		0.00808205	0.0258178
Solyc03g083245.1	black	PTHR12549//PTHR12549:SF12 - JMJC DOMAIN-CONTAINING HISTONE DEMETHYLATION PROTEIN // SUBFAMILY NOT NAMED			0.0497456
Solyc03g095985.1	black				0.00236063	0.016223			0.00806279
Solyc03g096660.2	black	1.1.1.206//1.1.1.236 - Tropinone reductase I / Tropinone reductase // Tropinone reductase II / Tropinone reductase			0.00127938	0.00175863		0.0391014	0.00770295
Solyc03g096760.1	black				5.29579e-05	0.000201425		8.26281e-09	2.26145e-06
Solyc03g096810.3	black	PTHR21433 - TRANSMEMBRANE PROTEIN INDUCED BY TUMOR NECROSIS FACTOR ALPHA			0.00116917	0.000432338		0.000376808	0.00839055
Solyc03g097060.3	black	PTHR11062//PTHR11062:SF54 - EXOSTOSIN HEPARAN SULFATE GLYCOSYLTRANSFERASE -RELATED // EXOSTOSIN FAMILY PROTEIN			0.0111804				0.0385132
Solyc03g097210.3	black	PTHR10584//PTHR10584:SF162 - SUGAR KINASE // SUBFAMILY NOT NAMED			0.0121021	0.0495464		0.0454151
Solyc03g097360.3	black	PTHR12735//PTHR12735:SF6 - BOLA-LIKE PROTEIN-RELATED // SUBFAMILY NOT NAMED			0.000569279	0.00833256		0.000330675	9.57559e-06
Solyc03g097585.1	black	PTHR10791//PTHR10791:SF33 - RAG1-ACTIVATING PROTEIN 1 // SUBFAMILY NOT NAMED			0.0131175				0.0128125
Solyc03g097950.3	black	K02904 - large subunit ribosomal protein L29 (RP-L29, rpmC)			8.73868e-08	3.09827e-06		7.32661e-08	6.89379e-13
Solyc03g098450.3	black	PTHR32258//PTHR32258:SF3 - FAMILY NOT NAMED // F11A17.4-RELATED				0.0301105
Solyc03g098790.2	black				0.0368338	0.0011768		0.0337904
Solyc03g110875.1	black	K07342 - protein transport protein SEC61 subunit gamma and related proteins (SEC61G, SSS1, secE)			0.0411722			0.0268184	0.000815438
Solyc03g111610.3	black	PTHR18901//PTHR18901:SF9 - 2-DEOXYGLUCOSE-6-PHOSPHATE PHOSPHATASE 2 // SUBFAMILY NOT NAMED			1.20498e-29	1.23332e-39		3.77448e-40	2.54483e-27
Solyc03g112150.1	black	PTHR23115//PTHR23115:SF146 - TRANSLATION FACTOR // SUBFAMILY NOT NAMED			1.95425e-08	1.98309e-06		1.54993e-08	8.56253e-10
Solyc03g112220.1	black					0.0398051
Solyc03g113240.3	black	PF06549 - Protein of unknown function (DUF1118) (DUF1118)			3.85784e-05	4.8248e-10		3.75588e-11	0.000152145
Solyc03g113420.3	black	PTHR11654:SF59 - PROTEIN NRT1/ PTR FAMILY 2.10-RELATED	0.0153282			0.000992047	0.035935	0.0208055
Solyc03g113590.3	black	PTHR23407:SF1 - 5-FORMYLTETRAHYDROFOLATE CYCLO-LIGASE			0.0026345	0.0121441		0.0153496	0.0283674
Solyc03g113800.3	black	1.2.1.8 - Betaine-aldehyde dehydrogenase / Betaine aldehyde oxidase			0.0214512			0.00607772	0.00053219
Solyc03g113910.3	black	PTHR23201//PTHR23201:SF18 - EXTENSIN, PROLINE-RICH PROTEIN // SUBFAMILY NOT NAMED				0.00210834	0.0400237	4.00851e-10	0.00151342
Solyc03g114165.1	black	PF05160 - DSS1/SEM1 family (DSS1_SEM1)			0.0483883	0.0228708		2.00255e-06	2.74849e-06
Solyc03g114240.3	black	PF03181 - BURP domain (BURP)			0.02524
Solyc03g114380.3	black	PTHR24115//PTHR24115:SF372 - FAMILY NOT NAMED // KIF19A						0.00519633	0.036829
Solyc03g114460.3	black	KOG1175 - Acyl-CoA synthetase			6.01283e-07	4.41352e-08		2.39477e-12	3.5946e-09
Solyc03g114930.3	black	PTHR31407:SF4 - PSBP-LIKE PROTEIN 1, CHLOROPLASTIC			7.75752e-18	8.97937e-16		6.15682e-30	1.20001e-21
Solyc03g115540.2	black	PTHR12565:SF165 - TRANSCRIPTION FACTOR PIF7			0.0226852	0.0450329
Solyc03g115820.3	black	PTHR11749//PTHR11749:SF4 - RIBULOSE-5-PHOSPHATE-3-EPIMERASE // D-RIBULOSE-5-PHOSPHATE-3-EPIMERASE						0.0394513	0.00486257
Solyc03g115900.3	black	K08910 - light-harvesting complex I chlorophyll a/b binding protein 4 (LHCA4)			2.79961e-05	1.75062e-16		1.61142e-25	4.00261e-05
Solyc03g115980.1	black	PTHR10617:SF116 - GERANYLGERANYL DIPHOSPHATE REDUCTASE, CHLOROPLASTIC			9.49038e-05	3.35777e-08		2.61197e-11	5.46735e-05
Solyc03g116320.3	black	PTHR31072//PTHR31072:SF33 - FAMILY NOT NAMED // TRANSCRIPTION FACTOR TCP15			0.00334321	0.00141844		0.00571538	0.00821697
Solyc03g117180.3	black	2.7.11.1 - Non-specific serine/threonine protein kinase / Threonine-specific protein kinase			0.0303399
Solyc03g117480.3	black	PF03030//PF13499 - Inorganic H+ pyrophosphatase (H_PPase) // EF-hand domain pair (EF-hand_7)			0.00202733	0.0209088		0.00265798	0.000135036
Solyc03g117740.3	black				1.50302e-14	6.82208e-19		2.09519e-21	2.53472e-13
Solyc03g118120.3	black				1.33497e-11	1.96164e-24		4.53496e-19	2.10331e-09
Solyc03g118240.3	black	2.1.1.11 - Magnesium protoporphyrin IX methyltransferase / S-adenosylmethioninemagnesium protoporphyrin methyltransferase			1.58373e-07	3.97818e-18		4.2992e-17	1.63097e-06
Solyc03g118310.3	black	PF00010 - Helix-loop-helix DNA-binding domain (HLH)			4.13513e-07	1.59133e-06		0.000357953	4.02351e-06
Solyc03g118480.3	black	PF10497 - Zinc-finger domain of monoamine-oxidase A repressor R1 (zf-4CXXC_R1)							0.0313751
Solyc03g118920.3	black	PTHR18934:SF112 - DEA(D/H)-BOX RNA HELICASE FAMILY PROTEIN			0.00309383	0.00136243		0.000297055	0.0150357
Solyc03g119210.1	black	PF14368 - Probable lipid transfer (LTP_2)				0.0413705		0.043985
Solyc03g119540.3	black	PTHR31874:SF1 - CCT MOTIF FAMILY PROTEIN-RELATED			6.9429e-14	7.80946e-17		5.14581e-24	1.16886e-16
Solyc03g119570.2	black	PTHR12121//PTHR12121:SF29 - CARBON CATABOLITE REPRESSOR PROTEIN 4 // PROTEIN ANGEL			0.0428466	0.0229496
Solyc03g120440.2	black	2.7.1.31 - Glycerate 3-kinase			1.0884e-08	2.95942e-08		4.44466e-06	6.24566e-07
Solyc03g120630.3	black	PTHR10744//PTHR10744:SF7 - 40S RIBOSOMAL PROTEIN S11 FAMILY MEMBER // 30S RIBOSOMAL PROTEIN S17, CHLOROPLASTIC			2.9211e-16	5.78203e-29		4.54436e-33	1.30485e-15
Solyc03g120640.3	black	K02695 - photosystem I subunit VI (psaH)			3.87583e-06	1.48303e-06		4.70334e-05	1.92513e-06
Solyc03g120940.3	black	PF16719 - SAWADEE domain (SAWADEE)			0.0416661	0.0367096
Solyc03g120950.3	black				0.000308151	0.00389534			0.0063338
Solyc03g121180.3	black	PTHR22835//PTHR22835:SF170 - ZINC FINGER FYVE DOMAIN CONTAINING PROTEIN // SUBFAMILY NOT NAMED			0.00971319			0.000185447	0.000793094
Solyc03g121260.3	black	2.1.1.190 - 23S rRNA (uracil(1939)-C(5))-methyltransferase / RNA uridine methyltransferase A			0.010781				0.0270692
Solyc03g121720.3	black				2.31451e-34	4.57639e-32		5.34912e-39	1.131e-41
Solyc03g121800.3	black	PF01217//PF02874 - Clathrin adaptor complex small chain (Clat_adaptor_s) // ATP synthase alpha/beta family, beta-barrel domain (ATP-synt_ab_N)				0.025726
Solyc03g121860.1	black	K17794 - mitochondrial import inner membrane translocase subunit TIM23 (TIM23)			0.00115576	0.0128119		3.98668e-05	3.30132e-05
Solyc03g121870.3	black	PTHR22809//PTHR22809:SF8 - METHYLTRANSFERASE-RELATED // SUBFAMILY NOT NAMED			0.0269942
Solyc03g121900.1	black	PF14368 - Probable lipid transfer (LTP_2)			8.81523e-06	0.000291781		2.96689e-07	1.16656e-08
Solyc03g123660.3	black	K04554 - ubiquitin-conjugating enzyme E2 J2 (UBE2J2, NCUBE2, UBC6)			0.0242128
Solyc03g123880.3	black	PTHR13343//PTHR13343:SF14 - CREG1 PROTEIN // GENOMIC DNA, CHROMOSOME 3, P1 CLONE: MXL8			1.22321e-08	3.95433e-10		1.07064e-12	1.57704e-07
Solyc03g124060.3	black	PTHR19308:SF13 - MEMBRANE RELATED PROTEIN CP5-RELATED			0.0115132				0.0447403
Solyc04g005200.3	black	K14759 - isochorismate synthase / 2-succinyl-5-enolpyruvyl-6-hydroxy-3-cyclohexene-1-carboxylate synthase / 2-succinyl-6-hydroxy-2,4-cyclohexadiene-1-carboxylate synthase / O-succinylbenzoate synthase (PHYLLO)			0.00681725	0.00114151
Solyc04g005830.3	black	PTHR20953//PTHR20953:SF4 - KINASE-RELATED // SUBFAMILY NOT NAMED			8.4489e-05	1.62227e-05		0.00109399	0.00071475
Solyc04g007110.3	black				0.00521402	0.0330099			0.0156906
Solyc04g007260.3	black	PTHR31793//PTHR31793:SF5 - FAMILY NOT NAMED // THIOESTERASE-LIKE PROTEIN						0.0267721
Solyc04g007780.3	black	PTHR31907:SF4 - MLP-LIKE PROTEIN 165-RELATED			0.0329978	1.48855e-05		7.32009e-06
Solyc04g008260.3	black	PTHR10161 - TARTRATE-RESISTANT ACID PHOSPHATASE TYPE 5			5.79184e-09	9.19529e-08		1.18381e-07	5.28883e-08
Solyc04g008380.3	black	PTHR31421:SF0 - PROTEIN BASIC PENTACYSTEINE1-RELATED				0.00427233		0.00269895
Solyc04g008650.3	black	PTHR27008:SF40 - LEUCINE-RICH REPEAT PROTEIN KINASE-LIKE PROTEIN			0.000464746	0.00457951			0.00458959
Solyc04g009030.3	black	PTHR10836//PTHR10836:SF38 - GLYCERALDEHYDE 3-PHOSPHATE DEHYDROGENASE // GLYCERALDEHYDE-3-PHOSPHATE DEHYDROGENASE GAPA1, CHLOROPLASTIC-RELATED			7.24256e-54	2.14412e-69		1.8515e-102	1.31514e-56
Solyc04g009200.3	black	5.4.3.8 - Glutamate-1-semialdehyde 2,1-aminomutase / Glutamate-1-semialdehyde aminotransferase			2.84725e-13	1.16646e-25		1.02285e-37	3.49138e-13
Solyc04g009420.3	black	PTHR31407//PTHR31407:SF3 - FAMILY NOT NAMED // PSBP DOMAIN-CONTAINING PROTEIN 2, CHLOROPLASTIC			7.55189e-06	0.000103317		0.000124857	3.14542e-06
Solyc04g009510.3	black	PF00808//PF14570 - Histone-like transcription factor (CBF/NF-Y) and archaeal histone (CBFD_NFYB_HMF) // RING/Ubox like zinc-binding domain (zf-RING_4)			0.00106912	0.00488437		0.00733597	0.000990729
Solyc04g009530.3	black	PTHR11260//PTHR11260:SF320 - GLUTATHIONE S-TRANSFERASE, GST, SUPERFAMILY, GST DOMAIN CONTAINING // SUBFAMILY NOT NAMED			5.57028e-05	0.000187502		0.0108916	0.00144122
Solyc04g009540.1	black	K02864 - large subunit ribosomal protein L10 (RP-L10, MRPL10, rplJ)			1.35637e-15	4.92659e-18		5.62937e-42	3.77077e-20
Solyc04g009630.3	black	K01187 - alpha-glucosidase (malZ)			0.00114872	0.0124741		0.00956134	0.00797266
Solyc04g010055.1	black	PF01535//PF13041 - PPR repeat (PPR) // PPR repeat family (PPR_2)							0.039508
Solyc04g011510.3	black	PTHR21139:SF6 - TRIOSEPHOSPHATE ISOMERASE, CYTOSOLIC			4.1487e-07	1.71418e-07		1.36721e-09	1.70142e-06
Solyc04g011900.3	black	PTHR33471:SF5 - EXPRESSED PROTEIN			0.000119207	1.2616e-06		1.19761e-09	0.00248692
Solyc04g012120.3	black	PTHR18860//PTHR18860:SF33 - 14-3-3 PROTEIN // SUBFAMILY NOT NAMED			0.0445408	0.0454922
Solyc04g014560.3	black	K12850 - pre-mRNA-splicing factor 38B (PRPF38B)			0.0309519
Solyc04g014910.3	black	2.7.11.1 - Non-specific serine/threonine protein kinase / Threonine-specific protein kinase			0.0408812
Solyc04g015040.3	black	PTHR10516//PTHR10516:SF264 - PEPTIDYL-PROLYL CIS-TRANS ISOMERASE // FK506-BINDING PROTEIN 1			2.53047e-30	2.55415e-34		4.0992e-29	2.75352e-27
Solyc04g015490.3	black	K03404 - magnesium chelatase subunit D (chlD, bchD)			4.2819e-14	1.28479e-25		4.01494e-21	8.43533e-12
Solyc04g017720.3	black	PTHR23201//PTHR23201:SF8 - EXTENSIN, PROLINE-RICH PROTEIN // SUBFAMILY NOT NAMED			1.91723e-12	1.34303e-15		5.89154e-20	1.55956e-10
Solyc04g026020.3	black	PF14576//PF14577 - Sieve element occlusion N-terminus (SEO_N) // Sieve element occlusion C-terminus (SEO_C)			0.0233511	0.0246133
Solyc04g026255.1	black					0.00462207
Solyc04g028565.1	black				1.46388e-06	1.33215e-10		1.70938e-09	1.71712e-05
Solyc04g045550.1	black	PF05758 - Ycf1 (Ycf1)			7.46828e-06	0.000221939		0.00339752	3.97152e-05
Solyc04g049135.1	black				7.60307e-08	3.50674e-13		3.72576e-09	4.00939e-06
Solyc04g049350.3	black	4.2.3.5 - Chorismate synthase / 5-enolpyruvylshikimate-3-phosphate phospholyase			0.00155525	1.51047e-05		0.00237514	0.0210525
Solyc04g049800.3	black	PTHR32467//PTHR32467:SF29 - FAMILY NOT NAMED // ETHYLENE-RESPONSIVE TRANSCRIPTION FACTOR RAP2-7	0.0152419		0.000328979	2.12323e-10		7.54252e-07	0.00760483
Solyc04g049840.3	black	PF00076//PF14570 - RNA recognition motif. (a.k.a. RRM, RBD, or RNP domain) (RRM_1) // RING/Ubox like zinc-binding domain (zf-RING_4)	0.0174543		0.00381469	2.52851e-06	0.0128761	6.10306e-09	0.0253945
Solyc04g050730.3	black	PTHR22835//PTHR22835:SF160 - ZINC FINGER FYVE DOMAIN CONTAINING PROTEIN // GDSL ESTERASE/LIPASE LTL1	0.0253879		0.00381986	6.74369e-16		4.88016e-15	0.0268813
Solyc04g051190.3	black	K15747 - beta-ring hydroxylase (LUT5, CYP97A3)				0.00991717	0.0150174	9.41984e-05
Solyc04g051580.3	black	K15111 - solute carrier family 25 (mitochondrial S-adenosylmethionine transporter), member 26 (SLC25A26)			0.0121974	6.37119e-05		2.24896e-06	0.0358078
Solyc04g053000.1	black	K14488 - SAUR family protein (SAUR)			0.00177829	0.0119081			0.0272325
Solyc04g054460.3	black	PTHR35483:SF1 - GLYCINE-RICH PROTEIN			1.07945e-08	7.04582e-10		2.50424e-19	2.32852e-09
Solyc04g056330.1	black	PTHR12510//PTHR12510:SF7 - TROPONIN C-AKIN-1 PROTEIN // AIG2-LIKE (AVIRULENCE INDUCED GENE) FAMILY PROTEIN			0.0135486	0.00741728
Solyc04g070970.3	black	PTHR19241//PTHR19241:SF286 - ATP-BINDING CASSETTE TRANSPORTER // SUBFAMILY NOT NAMED			0.0262522
Solyc04g071165.1	black	KOG4473 - Uncharacterized membrane protein			0.0134913				0.0218196
Solyc04g071540.3	black	PTHR11926//PTHR11926:SF117 - GLUCOSYL/GLUCURONOSYL TRANSFERASES // STEROL 3-BETA-GLUCOSYLTRANSFERASE UGT80B1			0.00639091	0.0196739		0.0101029	0.0050074
Solyc04g071565.1	black	PTHR10438//PTHR10438:SF280 - THIOREDOXIN // THIOREDOXIN Y1, CHLOROPLASTIC-RELATED			4.32808e-06	4.02688e-05		0.000113189	1.27153e-05
Solyc04g071860.3	black	PTHR22883:SF41 - PROTEIN S-ACYLTRANSFERASE 8						0.0165007	0.00910937
Solyc04g072110.3	black				0.0107088	0.0113804
Solyc04g072520.2	black	PTHR13068:SF28 - MITOCHONDRIAL TRANSCRIPTION TERMINATION FACTOR FAMILY PROTEIN-RELATED			0.0328656
Solyc04g072670.3	black	K12875 - apoptotic chromatin condensation inducer in the nucleus (ACIN1, ACINUS)			0.00324777	4.79034e-09		5.94915e-08	0.0147237
Solyc04g074040.3	black	K12891 - splicing factor, arginine/serine-rich 2 (SFRS2)			0.0121949
Solyc04g074510.3	black	PTHR18860//PTHR18860:SF26 - 14-3-3 PROTEIN // SUBFAMILY NOT NAMED			1.48635e-06	7.20718e-06		1.16978e-05	9.48849e-06
Solyc04g074570.1	black				0.0471989			0.0302702
Solyc04g074640.3	black	PTHR31356:SF6 - THYLAKOID LUMENAL 29 KDA PROTEIN, CHLOROPLASTIC			1.04717e-28	2.47419e-46		7.65406e-80	1.0609e-28
Solyc04g074730.1	black	2.7.7.48//3.4.22.44//3.4.22.45 - RNA-directed RNA polymerase / RNA nucleotidyltransferase (RNA-directed) // Nuclear-inclusion-a endopeptidase / Potyvirus NIa protease // Helper-component proteinase / HC-Pro			6.91369e-07	3.43292e-08		1.44202e-08	1.01386e-06
Solyc04g074990.3	black	PTHR31948:SF20 - ZINC-FINGER HOMEODOMAIN PROTEIN 1			0.0096809	0.00556521		0.000533296	0.000475858
Solyc04g075000.1	black	2.7.11.1 - Non-specific serine/threonine protein kinase / Threonine-specific protein kinase	0.0361609		0.04418	0.000572405		0.00697049
Solyc04g076870.3	black	K02492 - glutamyl-tRNA reductase (hemA)			1.42375e-27	5.17588e-58		1.698e-64	5.98663e-26
Solyc04g077120.3	black	PTHR14217:SF3 - INOSITOL-TETRAKISPHOSPHATE 1-KINASE 2-RELATED			1.11982e-08	7.78446e-09		2.28904e-10	4.61487e-09
Solyc04g078940.3	black	PF08553 - VID27 cytoplasmic protein (VID27)							0.041212
Solyc04g079125.1	black	PF02362 - B3 DNA binding domain (B3)			0.00361609	0.0226736		0.00271115	0.00477702
Solyc04g079780.3	black	PF00097//PF00380//PF01485 - Zinc finger, C3HC4 type (RING finger) (zf-C3HC4) // Ribosomal protein S9/S16 (Ribosomal_S9) // IBR domain, a half RING-finger domain (IBR)			3.60963e-08	2.8283e-06		5.87672e-09	2.00639e-09
Solyc04g079860.1	black	PTHR13778:SF6 - GALACTURONOSYLTRANSFERASE-LIKE 1-RELATED						0.0415679
Solyc04g080100.3	black	PTHR24282//PTHR24282:SF30 - CYTOCHROME P450 FAMILY MEMBER // SUBFAMILY NOT NAMED			0.0414419
Solyc04g080435.1	black	PTHR24078:SF279 - DUPLICATED SANT DNA-BINDING DOMAIN-CONTAINING PROTEIN			0.0447966	0.0338533
Solyc04g080450.1	black	K15397 - 3-ketoacyl-CoA synthase (KCS)			0.0216137			0.0277266	0.0167579
Solyc04g080490.3	black	PTHR31948:SF15 - ZINC-FINGER HOMEODOMAIN PROTEIN 5						0.0410776
Solyc04g080870.1	black	PTHR23327//PTHR23327:SF12 - RING FINGER PROTEIN 127 // ATP-DEPENDENT PROTEASE LA DOMAIN-CONTAINING PROTEIN			1.96499e-05	2.89145e-05		0.000474934	0.000349963
Solyc04g081130.1	black	1.1.3.9 - Galactose oxidase / Beta-galactose oxidase			0.0292374	0.0224341		0.00113016	0.00358164
Solyc04g081320.3	black	PTHR15852//PTHR15852:SF27 - FAMILY NOT NAMED // PROTEIN DISULFIDE-ISOMERASE LQY1			1.44776e-09	4.72159e-08		3.89271e-10	3.28092e-11
Solyc04g081530.1	black	PTHR24078//PTHR24078:SF231 - DNAJ HOMOLOG SUBFAMILY C MEMBER // CHAPERONE PROTEIN DNAJ			0.00244601	0.0120118			0.0249516
Solyc04g081870.3	black	PTHR31867//PTHR31867:SF4 - FAMILY NOT NAMED // EXPANSIN-A11			8.54535e-05	2.89576e-09		1.51694e-14	3.45922e-05
Solyc04g082010.1	black	K02638 - plastocyanin (petE)			5.94259e-14	2.43697e-10		5.56778e-17	1.39991e-17
Solyc04g082490.3	black	K12385 - Niemann-Pick C1 protein (NPC1)			0.0399333
Solyc04g082630.3	black	PTHR10836:SF39 - GLYCERALDEHYDE-3-PHOSPHATE DEHYDROGENASE GAPB, CHLOROPLASTIC			8.03754e-26	4.24363e-40		2.17589e-51	4.26248e-26
Solyc04g082840.3	black	K07760 - cyclin-dependent kinase [EC:2.7.11.22] (CDK)			0.00276652	0.00558805		0.044344	0.0186311
Solyc04g082900.3	black	K02178 - checkpoint serine/threonine-protein kinase (BUB1)			0.00210712	0.0215493			0.0131303
Solyc05g005535.1	black				0.00255258	0.0173883			0.0126986
Solyc05g005873.1	black	K02952 - small subunit ribosomal protein S13 (RP-S13, rpsM)			3.55109e-16	1.2021e-18		1.24782e-31	8.77812e-21
Solyc05g006000.2	black	PTHR11654//PTHR11654:SF123 - OLIGOPEPTIDE TRANSPORTER-RELATED // SUBFAMILY NOT NAMED	0.0259416
Solyc05g006830.3	black	PTHR10438//PTHR10438:SF296 - THIOREDOXIN // SUBFAMILY NOT NAMED			0.000909982	0.00498815			0.00558331
Solyc05g007000.3	black	PTHR11654//PTHR11654:SF98 - OLIGOPEPTIDE TRANSPORTER-RELATED // PROTEIN NRT1/ PTR FAMILY 4.5-RELATED			0.0431918
Solyc05g007180.3	black	PTHR24326:SF176 - HOMEOBOX-LEUCINE ZIPPER PROTEIN ATHB-13-RELATED			8.14577e-07	4.43539e-11		6.16482e-11	1.7773e-06
Solyc05g007680.1	black	PTHR35279//PTHR35279:SF1 - FAMILY NOT NAMED // ARABINANASE/LEVANSUCRASE/INVERTASE			7.29216e-09	2.54525e-09		1.65393e-10	7.24983e-09
Solyc05g007780.3	black	PTHR33399//PTHR33399:SF5 - FAMILY NOT NAMED // PSBQ-LIKE PROTEIN 1, CHLOROPLASTIC			0.000882216	0.00494357			0.0114297
Solyc05g007790.3	black	PTHR11615//PTHR11615:SF81 - NITRATE, FROMATE, IRON DEHYDROGENASE // CASPARIAN STRIP MEMBRANE PROTEIN 5			0.040845
Solyc05g008595.1	black				0.021641	0.0327621		0.0389246	0.0106538
Solyc05g009030.3	black	K00052 - 3-isopropylmalate dehydrogenase (leuB)			3.74192e-07	7.02875e-06		2.17181e-05	2.05018e-06
Solyc05g009150.3	black	PTHR21319//PTHR21319:SF9 - RING FINGER AND CHY ZINC FINGER DOMAIN-CONTAINING PROTEIN 1 // SUBFAMILY NOT NAMED				0.0495901
Solyc05g009250.2	black							0.0240694
Solyc05g009370.3	black	PTHR12934//PTHR12934:SF11 - 50S RIBOSOMAL PROTEIN L15 // 50S RIBOSOMAL PROTEIN L15, CHLOROPLASTIC			6.75746e-21	1.02684e-42		1.08144e-100	1.11775e-24
Solyc05g009570.3	black	PTHR35108//PTHR35108:SF1 - FAMILY NOT NAMED // 30S RIBOSOMAL PROTEIN 3-1, CHLOROPLASTIC-RELATED			4.20786e-09	1.15199e-21		3.13556e-31	1.62491e-09
Solyc05g009620.3	black	PF04749 - PLAC8 family (PLAC8)				0.0108104
Solyc05g009890.1	black	PTHR13683//PTHR13683:SF354 - ASPARTYL PROTEASES // ASPARTYL PROTEASE FAMILY PROTEIN			0.00824264
Solyc05g012370.3	black	PTHR10992//PTHR10992:SF783 - ALPHA/BETA HYDROLASE FOLD-CONTAINING PROTEIN // SUBFAMILY NOT NAMED			2.48949e-13	2.71628e-18		5.45224e-14	7.60282e-11
Solyc05g013150.3	black	K00592 - [ribulose-bisphosphate carboxylase]-lysine N-methyltransferase (E2.1.1.127)			0.0002561	0.00291338		0.00108216	3.78567e-05
Solyc05g013160.3	black	K00592 - [ribulose-bisphosphate carboxylase]-lysine N-methyltransferase (E2.1.1.127)			9.8076e-05	0.000231697		1.54133e-05	3.01246e-05
Solyc05g013960.3	black	PTHR10972//PTHR10972:SF67 - OXYSTEROL-BINDING PROTEIN-RELATED // OXYSTEROL-BINDING PROTEIN-RELATED PROTEIN 1D	0.0496551			0.000792629		0.00370908
Solyc05g014310.3	black	PTHR11804//PTHR11804:SF42 - PROTEASE M3 THIMET OLIGOPEPTIDASE-RELATED // SUBFAMILY NOT NAMED			5.52982e-17	6.92618e-25		6.4938e-24	1.39334e-14
Solyc05g015955.1	black				0.0223815
Solyc05g016130.2	black	PTHR26312//PTHR26312:SF81 - FAMILY NOT NAMED // PHOTOSYSTEM I ASSEMBLY PROTEIN YCF3			0.0352252
Solyc05g016330.3	black	PTHR24291//PTHR24291:SF46 - FAMILY NOT NAMED // CYTOCHROME P450 97B3, CHLOROPLASTIC			0.000146624	2.42009e-05		0.000110733	0.000542405
Solyc05g018510.3	black	PTHR19241:SF280 - ABC TRANSPORTER G FAMILY MEMBER 32			0.00446246	0.0366061			0.00632715
Solyc05g024430.3	black				1.56076e-30	4.02856e-31		1.51648e-56	2.18994e-35
Solyc05g026360.3	black	PTHR11034//PTHR11034:SF23 - N-MYC DOWNSTREAM REGULATED // N-MYC DOWNREGULATED-LIKE 3 PROTEIN			0.0104196				0.0253945
Solyc05g026570.3	black	PTHR36340:SF1 - CHLORORESPIRATORY REDUCTION 3			0.00020167	0.000219856		0.0230679	0.00413744
Solyc05g050110.3	black	PF10184 - Uncharacterized conserved protein (DUF2358) (DUF2358)				0.000465712		3.6695e-05	0.0450913
Solyc05g050200.3	black	PTHR21668//PTHR21668:SF5 - EIF-1A // NUCLEIC ACID-BINDING, OB-FOLD-LIKE PROTEIN-RELATED			0.00685353	0.0377987		0.0157824	0.00533253
Solyc05g050500.1	black	PTHR11910//PTHR11910:SF8 - ATP SYNTHASE DELTA CHAIN // SUBFAMILY NOT NAMED			1.36083e-09	4.40545e-15		2.94484e-16	3.06653e-08
Solyc05g050710.3	black	2.3.1.43 - Phosphatidylcholine--sterol O-acyltransferase / Phospholipid--cholesterol acyltransferase			0.00992779				0.0233505
Solyc05g050940.3	black	PTHR11735//PTHR11735:SF12 - O-SIALOGLYCOPROTEIN ENDOPEPTIDASE // TRNA N6-ADENOSINE THREONYLCARBAMOYLTRANSFERASE, MITOCHONDRIAL-RELATED						8.81527e-06
Solyc05g050980.3	black	K00800 - 3-phosphoshikimate 1-carboxyvinyltransferase (aroA)	6.57627e-05		0.000300358	2.32965e-24	0.000591834	5.85725e-28	0.00293169
Solyc05g051230.3	black	PTHR10953//PTHR10953:SF135 - UBIQUITIN-ACTIVATING ENZYME E1 // SUBFAMILY NOT NAMED			0.00158406	1.25419e-08		1.3167e-06	0.0100935
Solyc05g051250.3	black	K01915 - glutamine synthetase (glnA, GLUL)			0.0404063	0.0144749
Solyc05g051660.1	black	PTHR23024//PTHR23024:SF183 - MEMBER OF 'GDXG' FAMILY OF LIPOLYTIC ENZYMES // SUBFAMILY NOT NAMED			7.0104e-05	9.94665e-05		0.00192337	0.00153014
Solyc05g052600.3	black	3.1.3.37 - Sedoheptulose-bisphosphatase / Sedoheptulose-1,7-bisphosphatase			2.75358e-28	2.83381e-40		9.61761e-52	1.72462e-29
Solyc05g052700.3	black				0.0153706	0.0131308
Solyc05g052710.3	black	PTHR34550//PTHR34550:SF1 - FAMILY NOT NAMED // 30S RIBOSOMAL PROTEIN S31, CHLOROPLASTIC			5.0287e-25	9.09062e-29		3.57978e-67	2.12056e-35
Solyc05g053300.3	black	PTHR22912//PTHR22912:SF148 - DISULFIDE OXIDOREDUCTASE // SUBFAMILY NOT NAMED			2.28484e-32	2.01995e-29		1.5518e-27	4.60155e-32
Solyc05g053690.2	black	K11844 - ubiquitin carboxyl-terminal hydrolase 16/45 [EC:3.4.19.12] (USP16_45)			0.0311073
Solyc05g053950.3	black	PF07103 - Protein of unknown function (DUF1365) (DUF1365)			0.0024056	0.0267322		0.00660844	0.000860437
Solyc05g054030.3	black	PTHR10593//PTHR10593:SF35 - SERINE/THREONINE-PROTEIN KINASE RIO // SUBFAMILY NOT NAMED	0.000165512		0.00593222	3.20707e-11	0.00536854	2.50431e-07	0.0419075
Solyc05g054050.3	black	4.1.1.15 - Glutamate decarboxylase / L-glutamate 1-carboxy-lyase			0.0200663
Solyc05g054090.3	black				2.11577e-19	1.10411e-19		2.31519e-22	3.48121e-22
Solyc05g054330.3	black	PTHR10992:SF829 - ALPHA/BETA-HYDROLASES SUPERFAMILY PROTEIN			0.000831293	0.00508832		0.0175805	0.00405532
Solyc05g054480.3	black	PTHR11937//PTHR11937:SF255 - ACTIN // SUBFAMILY NOT NAMED	0.0367624			0.0236073		0.0347507
Solyc05g054600.3	black	PTHR11946//PTHR11946:SF89 - ISOLEUCYL, LEUCYL, TYROSYL, VALYL AND METHIONYL-TRNA SYNTHETASES // METHIONYL-TRNA SYNTHETASE			0.0280782	0.0363042
Solyc05g054720.3	black	PTHR33510:SF6 - PROTEIN TIC 20-I, CHLOROPLASTIC			0.00217748	0.0226484		0.00123764	4.91042e-05
Solyc05g055440.1	black	K11252 - histone H2B (H2B)				0.0106312		0.00579518	0.0499481
Solyc05g055740.3	black	PF03162 - Tyrosine phosphatase family (Y_phosphatase2)			0.00018349	0.00457781			0.00367367
Solyc05g055840.3	black	PTHR11926//PTHR11926:SF333 - GLUCOSYL/GLUCURONOSYL TRANSFERASES // UDP-GLYCOSYLTRANSFERASE 86A2			0.0174421
Solyc05g056050.3	black	K08907 - light-harvesting complex I chlorophyll a/b binding protein 1 (LHCA1)			6.28008e-09	3.47166e-21		5.18708e-28	3.87009e-09
Solyc05g056255.1	black	PTHR11538//PTHR11538:SF41 - PHENYLALANYL-TRNA SYNTHETASE // PHENYLALANINE--TRNA LIGASE, MITOCHONDRIAL			1.45674e-10	3.03474e-11		1.27753e-12	3.57656e-11
Solyc05g056290.3	black	PTHR12375//PTHR12375:SF32 - RNA-BINDING PROTEIN LUC7-RELATED // SUBFAMILY NOT NAMED							0.0335197
Solyc05g056295.1	black	K02160 - acetyl-CoA carboxylase biotin carboxyl carrier protein (accB, bccP)			1.9197e-10	1.12061e-14		2.54797e-23	1.03667e-11
Solyc06g005710.3	black	PTHR14194//PTHR14194:SF38 - NITROGEN METABOLIC REGULATION PROTEIN NMR-RELATED // PROTEIN PLASTID TRANSCRIPTIONALLY ACTIVE 16			2.27364e-16	4.45365e-25		6.0355e-39	6.39958e-16
Solyc06g007160.3	black	1.6.5.9 - NADH:ubiquinone reductase (non-electrogenic) / Ubiquinone reductase			9.292e-06	4.45702e-05		2.55607e-05	0.000126883
Solyc06g007350.3	black	PTHR12320//PTHR12320:SF7 - PROTEIN PHOSPHATASE 2C // PROTEIN PHOSPHATASE 2C 26-RELATED			5.57369e-06	1.12455e-05		2.87911e-05	4.39238e-05
Solyc06g007610.3	black				0.0246748				0.0199716
Solyc06g007630.1	black	PTHR23426//PTHR23426:SF30 - FERREDOXIN/ADRENODOXIN // ADRENODOXIN-LIKE PROTEIN, MITOCHONDRIAL			0.0142649				0.0199153
Solyc06g007760.3	black	PF10674 - Protein of unknown function (DUF2488) (Ycf54)			2.51651e-13	3.10455e-13		2.12301e-31	9.61496e-17
Solyc06g008120.1	black	K17769 - mitochondrial import receptor subunit TOM22 (TOM22)			0.000200173	0.00154027		8.36343e-06	1.19092e-05
Solyc06g008160.3	black	PTHR10098//PTHR10098:SF117 - RAPSYN-RELATED // SUBFAMILY NOT NAMED			2.36983e-10	2.11088e-10		2.01518e-21	4.22748e-14
Solyc06g008500.3	black	PTHR24188:SF44 - E3 UBIQUITIN-PROTEIN LIGASE XBAT35-RELATED			0.0385594
Solyc06g011450.2	black	PTHR22951//PTHR22951:SF13 - CLATHRIN ASSEMBLY PROTEIN // SUBFAMILY NOT NAMED						0.0091285	0.00509941
Solyc06g019170.3	black	1.2.1.41//2.7.2.11 - Glutamate-5-semialdehyde dehydrogenase / Glutamyl-gamma-semialdehyde dehydrogenase // Glutamate 5-kinase / Gamma-glutamyl kinase			4.57075e-09	1.44661e-10		1.8208e-10	4.97406e-08
Solyc06g030510.3	black	PTHR32166//PTHR32166:SF27 - FAMILY NOT NAMED // HAT DIMERIZATION DOMAIN-CONTAINING PROTEIN-RELATED			0.0100137				0.0456512
Solyc06g030570.3	black	PTHR30544:SF6 - RADICAL SAM DOMAIN-CONTAINING PROTEIN			1.93015e-08	4.98366e-07		3.25528e-14	3.83678e-13
Solyc06g034290.3	black	PTHR11662:SF232 - GLYCEROL-3-PHOSPHATE TRANSPORTER 4-RELATED			0.0474051
Solyc06g035860.2	black				0.00328332	0.0349834		0.0369862	0.012911
Solyc06g043150.3	black	PTHR19918//PTHR19918:SF7 - CELL DIVISION CYCLE 20 CDC20 FIZZY -RELATED // PROTEIN FIZZY-RELATED 3				0.0374757		0.013246	0.0320175
Solyc06g048410.3	black	PTHR11404//PTHR11404:SF25 - SUPEROXIDE DISMUTASE 2 // SUBFAMILY NOT NAMED	0.0393126		0.0297819	6.33591e-06	0.0268004	1.53088e-18	0.00235068
Solyc06g048540.3	black	K09013 - Fe-S cluster assembly ATP-binding protein (sufC)			0.00264396	0.00252611		0.00665398	0.034128
Solyc06g049030.3	black	K19040 - E3 ubiquitin-protein ligase ATL10/75/76/77/78 [EC:6.3.2.19] (ATL76S)			0.000747558	0.00455861			0.0118313
Solyc06g049040.3	black	PF00170 - bZIP transcription factor (bZIP_1)			1.56916e-07	2.49983e-06		2.69809e-05	5.37199e-07
Solyc06g049050.3	black	PTHR31867:SF22 - EXPANSIN-A8			9.46787e-35	1.06656e-43		1.06103e-46	3.46008e-32
Solyc06g050310.3	black	PTHR18901:SF29 - HALOACID DEHALOGENASE-LIKE HYDROLASE			0.00231496	0.0136268			0.0219364
Solyc06g050620.3	black	PF04187 - Haem-binding uptake, Tiki superfamily, ChaN (Cofac_haem_bdg)			0.0378988
Solyc06g051200.3	black	PTHR11229:SF5 - 50S RIBOSOMAL PROTEIN L3-1, CHLOROPLASTIC			2.36638e-16	7.97713e-17		1.61566e-47	8.2293e-29
Solyc06g053585.1	black	PTHR11732:SF255 - ARYL-ALCOHOL DEHYDROGENASE YPL088W-RELATED			8.45406e-16	9.84273e-16		4.397e-12	1.43973e-14
Solyc06g053700.1	black				0.0431513
Solyc06g053920.3	black					0.0116174		0.0317447
Solyc06g054260.1	black	K02692 - photosystem I subunit II (psaD)			1.13327e-08	3.30435e-09		9.12211e-12	3.76444e-09
Solyc06g060060.3	black	PTHR20275:SF6 - NADH KINASE POS5, MITOCHONDRIAL							0.0183869
Solyc06g060170.3	black	PTHR31339:SF4 - PECTIN LYASE-LIKE SUPERFAMILY PROTEIN			0.0378756
Solyc06g060640.1	black	PF14547 - Hydrophobic seed protein (Hydrophob_seed)			0.0172576				0.000388042
Solyc06g060790.1	black	K01704 - 3-isopropylmalate/(R)-2-methylmalate dehydratase small subunit (leuD)			0.00258024	0.0129684		1.47363e-05	4.21589e-05
Solyc06g061080.3	black	PTHR31989//PTHR31989:SF51 - FAMILY NOT NAMED // F5D14.30 PROTEIN-RELATED			0.0465471
Solyc06g061200.1	black				3.87342e-22	6.07705e-16		1.74728e-23	4.95519e-29
Solyc06g062600.3	black	K15403 - fatty acid omega-hydroxy dehydrogenase (ACE, HTH)			0.00121713	0.0211138		0.0205268	0.0170847
Solyc06g062720.2	black	PTHR24012:SF318 - RNA-BINDING (RRM/RBD/RNP MOTIFS) FAMILY PROTEIN							0.015726
Solyc06g063360.3	black				1.01748e-05	6.62901e-07		1.82251e-06	3.85986e-06
Solyc06g063420.3	black	K15201 - general transcription factor 3C polypeptide 3 (transcription factor C subunit 4) (GTP3C3, TFC4)			0.00171788	0.0240252			0.0250396
Solyc06g064460.3	black	K02936 - large subunit ribosomal protein L7Ae (RP-L7Ae, RPL7A)			0.000398053	0.00191292		0.00164566	0.00126235
Solyc06g064640.3	black	PTHR10992//PTHR10992:SF833 - ALPHA/BETA HYDROLASE FOLD-CONTAINING PROTEIN // HYDROLASE, ALPHA/BETA FOLD FAMILY PROTEIN			3.57928e-06	1.84426e-05		0.000570156	6.38302e-05
Solyc06g064820.3	black	PTHR22835//PTHR22835:SF143 - ZINC FINGER FYVE DOMAIN CONTAINING PROTEIN // SUBFAMILY NOT NAMED			6.00434e-05	0.000733927		0.00356834	0.00189106
Solyc06g065380.3	black	PTHR24349//PTHR24349:SF117 - SERINE/THREONINE-PROTEIN KINASE // SUBFAMILY NOT NAMED			0.0243109
Solyc06g065490.3	black	PTHR31407:SF14 - PSBP DOMAIN-CONTAINING PROTEIN 6, CHLOROPLASTIC			1.94917e-12	5.35489e-11		6.95565e-13	4.11321e-11
Solyc06g065500.3	black	K18213 - proteinaceous RNase P (PRORP)			4.19135e-10	2.45289e-10		2.43708e-07	4.41111e-08
Solyc06g065970.1	black	PTHR31731//PTHR31731:SF19 - FAMILY NOT NAMED // BIFUNCTIONAL INHIBITOR/LIPID-TRANSFER PROTEIN/SEED STORAGE 2S ALBUMIN SUPERFAMILY PROTEIN			3.37809e-10	6.56465e-07		3.76779e-05	2.75427e-10
Solyc06g066000.2	black	K02109 - F-type H+-transporting ATPase subunit b (ATPF0B, atpF)			1.38964e-09	2.09398e-06		0.000153889	1.74558e-08
Solyc06g066090.3	black	PTHR12169//PTHR12169:SF5 - ATPASE N2B // AFG1-LIKE ATPASE FAMILY PROTEIN			0.0116158
Solyc06g066640.3	black	PTHR34787//PTHR34787:SF1 - FAMILY NOT NAMED // PHOTOSYSTEM I REACTION CENTER SUBUNIT VI-1, CHLOROPLASTIC-RELATED			3.68437e-07	1.94157e-07		7.15627e-09	2.71778e-06
Solyc06g066790.3	black	PTHR22767//PTHR22767:SF2 - N-TERMINAL ACETLYTRANSFERASE-RELATED // NAT1			0.0150037				0.0139789
Solyc06g067880.3	black	K03661 - V-type H+-transporting ATPase 21kDa proteolipid subunit (ATPeV0B, ATP6F)			0.000354763	0.000249173		0.00179506	0.00400051
Solyc06g068010.3	black	PTHR18866//PTHR18866:SF99 - CARBOXYLASE:PYRUVATE/ACETYL-COA/PROPIONYL-COA CARBOXYLASE // SUBFAMILY NOT NAMED			1.25535e-07	1.51831e-18		9.99406e-35	7.91828e-08
Solyc06g068040.3	black	K01213 - galacturan 1,4-alpha-galacturonidase (E3.2.1.67)	1.93055e-13			7.232e-11	1.09071e-09	4.78243e-07
Solyc06g068480.3	black	PTHR34051:SF2 - PROTEIN LOW PSII ACCUMULATION 3, CHLOROPLASTIC			6.69341e-16	1.22998e-17		1.12726e-14	5.48794e-15
Solyc06g068670.3	black	PTHR31096//PTHR31096:SF16 - FAMILY NOT NAMED // ACT DOMAIN-CONTAINING PROTEIN			3.48024e-07	5.46934e-11		2.25722e-10	6.35981e-06
Solyc06g068960.1	black	PTHR10891:SF605 - CALCIUM-BINDING PROTEIN CML25-RELATED			0.00142454	0.00878089		0.0412435	0.004397
Solyc06g069170.3	black				2.31889e-05	0.000119304		5.05701e-05	7.78485e-06
Solyc06g069560.2	black				0.00398349	0.00550469		0.00450807	0.00370423
Solyc06g069790.3	black	PTHR23201:SF21 - GIBBERELLIN-REGULATED PROTEIN 4			1.28973e-05	0.000393795		0.00165561	4.16747e-05
Solyc06g069880.1	black	PTHR33781:SF3 - PROTEIN PHYTOCHROME KINASE SUBSTRATE 3							0.0466203
Solyc06g071480.3	black	PF02701 - Dof domain, zinc finger (zf-Dof)			0.0372681				0.0292271
Solyc06g071720.1	black	K02900 - large subunit ribosomal protein L27Ae (RP-L27Ae, RPL27A)			1.88032e-05	6.60124e-10		1.99289e-16	1.45688e-05
Solyc06g071960.3	black	PTHR11349:SF44 - NUCLEOSIDE DIPHOSPHATE KINASE II, CHLOROPLASTIC				0.0279811			0.00787312
Solyc06g072465.1	black	K02904 - large subunit ribosomal protein L29 (RP-L29, rpmC)			2.00909e-28	4.97136e-36		7.31042e-69	4.36545e-31
Solyc06g073020.3	black	PTHR34376//PTHR34376:SF2 - FAMILY NOT NAMED // SERINE PROTEASE INHIBITOR, KAZAL-TYPE FAMILY PROTEIN			0.0392161
Solyc06g073160.3	black	3.4.25.1 - Proteasome endopeptidase complex / Proteasome			0.036602
Solyc06g073290.1	black	PTHR34800:SF1 - TETRAPYRROLE-BINDING PROTEIN, CHLOROPLASTIC			7.88965e-13	1.53525e-23		1.16724e-23	2.03316e-12
Solyc06g074050.2	black	PF03168 - Late embryogenesis abundant protein (LEA_2)			0.0114898			0.0488866	0.00337634
Solyc06g074200.3	black	K14332 - photosystem I subunit PsaO (psaO)			1.50424e-09	1.36145e-12		1.75788e-19	2.9716e-11
Solyc06g074510.3	black	PTHR23029//PTHR23029:SF43 - PHOSPHOGLYCERATE MUTASE // DBJ|BAA92923.1			2.55436e-07	6.64803e-07		5.23295e-11	2.16805e-05
Solyc06g074780.2	black				0.00161207	0.00292495		0.00171444	0.000461743
Solyc06g075040.1	black				0.00819481	0.00432238		0.0175664	0.0103655
Solyc06g075160.3	black	K15501 - serine/threonine-protein phosphatase 6 regulatory subunit 3 (PPP6R3, SAPS3)			2.1101e-05	0.000359775		0.000417121	9.21941e-06
Solyc06g075930.1	black	K11254 - histone H4 (H4)			0.000194938	0.000433613		0.000104877	0.000365736
Solyc06g075960.1	black	K11254 - histone H4 (H4)	0.0393007			0.000386379	0.00655586	2.32345e-06	0.0222097
Solyc06g076110.2	black				0.0144058	0.0167654		0.0016575	0.000290883
Solyc06g076410.3	black	K14424 - 4-alpha-methyl-delta7-sterol-4alpha-methyl oxidase (SMO2)						0.033631	0.0261652
Solyc06g082500.3	black	PTHR11132//PTHR11132:SF98 - SOLUTE CARRIER FAMILY 35 // SUBFAMILY NOT NAMED			0.0373019
Solyc06g082940.3	black	K02699 - photosystem I subunit XI (psaL)			5.05667e-05	6.96248e-06		9.24921e-10	3.77092e-05
Solyc06g082950.3	black	K02699 - photosystem I subunit XI (psaL)			1.14558e-05	4.64462e-07		3.87246e-05	3.12116e-06
Solyc06g082995.1	black	PTHR23426//PTHR23426:SF30 - FERREDOXIN/ADRENODOXIN // ADRENODOXIN-LIKE PROTEIN, MITOCHONDRIAL			0.0144497	0.00259137		0.000342042	0.00760424
Solyc06g083030.3	black	PTHR11802//PTHR11802:SF96 - SERINE PROTEASE FAMILY S10 SERINE CARBOXYPEPTIDASE // SERINE CARBOXYPEPTIDASE-LIKE 20-RELATED			0.0176181			0.00424249	0.0121414
Solyc06g083090.3	black	K16586 - HAUS augmin-like complex subunit 3 (HAUS3)			0.031306
Solyc06g083490.3	black	1.1.1.206//1.1.1.236 - Tropinone reductase I / Tropinone reductase // Tropinone reductase II / Tropinone reductase			0.000890549	1.45312e-15		3.78985e-14	0.00740286
Solyc06g083750.3	black	PTHR32080:SF4 - CYSTEINE-RICH REPEAT SECRETORY PROTEIN 11-RELATED			0.0416789	0.0442514
Solyc06g083900.3	black	PTHR10641//PTHR10641:SF523 - MYB-LIKE DNA-BINDING PROTEIN MYB // SUBFAMILY NOT NAMED			0.00799251	0.00145127		0.000846072
Solyc06g084060.3	black	KOG1947 - Leucine rich repeat proteins, some proteins contain F-box						0.0412069
Solyc06g084120.3	black	PF06200//PF09425 - tify domain (tify) // Divergent CCT motif (CCT_2)			0.0199183
Solyc06g084155.1	black	PTHR11814//PTHR11814:SF60 - SULFATE TRANSPORTER // SULFATE TRANSPORTER 3.1-RELATED			9.14156e-06	2.25767e-09		3.47038e-07	0.000169643
Solyc06g084220.1	black								0.0215965
Solyc06g084240.2	black	5.5.1.13 - Ent-copalyl diphosphate synthase / Ent-kaurene synthetase A			0.0073718	0.0201433
Solyc06g084260.3	black	PTHR28039//PTHR28039:SF7 - FAMILY NOT NAMED // FATTY-ACID-BINDING PROTEIN 1			0.0360869
Solyc06g084360.3	black	PTHR12183:SF18 - RING-TYPE UBIQUITIN E3 LIGASE			0.00858141	0.0138502		0.000227228	0.000872983
Solyc06g084420.1	black	PF00560//PF08263 - Leucine Rich Repeat (LRR_1) // Leucine rich repeat N-terminal domain (LRRNT_2)			0.0192079				0.0402203
Solyc06g084615.1	black	5.2.1.14 - Beta-carotene isomerase			6.45598e-05	0.000175593		0.000291406	0.00192341
Solyc07g005090.3	black	PTHR11177//PTHR11177:SF208 - CHITINASE // SUBFAMILY NOT NAMED			0.0373019
Solyc07g005730.3	black	PTHR21659 - HYDROPHOBIC PROTEIN RCI2 LOW TEMPERATURE AND SALT RESPONSIVE PROTEIN LTI6 -RELATED			0.0326928	0.0265786		0.00270304
Solyc07g006000.3	black	K02916 - large subunit ribosomal protein L35 (RP-L35, MRPL35, rpmI)			5.02607e-21	1.55398e-26		2.31292e-45	7.6204e-27
Solyc07g006030.3	black				8.59194e-18	5.35566e-22		2.04135e-28	8.07721e-18
Solyc07g006060.3	black	PTHR22884//PTHR22884:SF285 - SET DOMAIN PROTEINS // HISTONE-LYSINE N-METHYLTRANSFERASE ASHR3				0.0396109
Solyc07g006070.1	black	1.1.1.271 - GDP-L-fucose synthase / GDP-fucose synthetase			0.0223815			0.0183629	0.00671713
Solyc07g006300.3	black	PTHR11863//PTHR11863:SF2 - STEROL DESATURASE // PROTEIN ECERIFERUM 3						0.010578	0.000141045
Solyc07g006390.2	black	PTHR22595:SF43 - EG45-LIKE DOMAIN CONTAINING PROTEIN 1-RELATED			0.0326749	0.00661195
Solyc07g006490.3	black				7.59447e-05	0.000842992		0.00308845	9.43764e-05
Solyc07g006650.3	black	5.3.1.5 - Xylose isomerase / D-xylose ketoisomerase							0.00845686
Solyc07g007350.1	black	PF07647 - SAM domain (Sterile alpha motif) (SAM_2)			0.0091808
Solyc07g007860.1	black	PF14547 - Hydrophobic seed protein (Hydrophob_seed)			0.0246294
Solyc07g008430.2	black				0.014085
Solyc07g008530.1	black	PTHR11766:SF0 - TYROSINE--TRNA LIGASE, MITOCHONDRIAL			0.0114898				0.0194438
Solyc07g009170.3	black	PTHR13622:SF8 - THIAMIN PYROPHOSPHOKINASE 1			0.00913318	0.0109433			0.0452554
Solyc07g015800.1	black	PF00646 - F-box domain (F-box)			0.0451272				0.0275628
Solyc07g015860.3	black	PTHR10458//PTHR10458:SF11 - PEPTIDE DEFORMYLASE // PEPTIDE DEFORMYLASE, MITOCHONDRIAL			1.04726e-05	2.22645e-05		4.00519e-06	3.34068e-05
Solyc07g017495.1	black				0.0492445
Solyc07g018360.3	black	K02357 - elongation factor Ts (tsf, TSFM)			3.53917e-07	1.39489e-15		1.22877e-43	3.95571e-08
Solyc07g022900.3	black	K08911 - light-harvesting complex I chlorophyll a/b binding protein 5 (LHCA5)			5.75035e-18	5.00714e-23		2.69402e-20	1.67327e-16
Solyc07g032490.3	black	PTHR11654//PTHR11654:SF85 - OLIGOPEPTIDE TRANSPORTER-RELATED // PROTEIN NRT1/ PTR FAMILY 6.2			2.92423e-06	6.96076e-05		1.35798e-10	1.54545e-07
Solyc07g032640.2	black	K02716 - photosystem II oxygen-evolving enhancer protein 1 (psbO)			1.14932e-07	7.55419e-11		5.4037e-16	2.22729e-08
Solyc07g039190.3	black				3.148e-09	8.77008e-13		2.18919e-14	2.30643e-08
Solyc07g039550.3	black	PTHR18934//PTHR18934:SF120 - ATP-DEPENDENT RNA HELICASE // SUBFAMILY NOT NAMED							0.0332889
Solyc07g041770.1	black	PTHR39113//PTHR39113:SF1 - FAMILY NOT NAMED // MEMBRANE LIPOPROTEIN-RELATED			0.00683792				0.0197785
Solyc07g042390.2	black	3.1.1.11 - Pectinesterase / Pectin methylesterase				0.0467313		0.0128627
Solyc07g042400.2	black				1.07977e-20	2.05979e-16		2.70101e-15	6.75965e-18
Solyc07g044860.3	black	PTHR31407:SF6 - OXYGEN-EVOLVING ENHANCER PROTEIN 2-1, CHLOROPLASTIC-RELATED			2.41115e-10	3.59361e-15		5.58675e-25	2.68991e-12
Solyc07g045210.1	black				5.26034e-05	0.00128531		5.76429e-05	3.37765e-06
Solyc07g045250.1	black				0.0187973
Solyc07g045440.1	black	PTHR32382//PTHR32382:SF4 - FAMILY NOT NAMED // FASCICLIN-LIKE ARABINOGALACTAN PROTEIN 1			5.10744e-05	0.000123295		0.00117529	0.000363697
Solyc07g047850.3	black	K08913 - light-harvesting complex II chlorophyll a/b binding protein 2 (LHCB2)			1.93616e-05	6.72902e-15		1.6766e-22	3.04915e-05
Solyc07g047940.3	black	PTHR24009//PTHR24009:SF4 - FAMILY NOT NAMED // ZINC FINGER CCCH DOMAIN-CONTAINING PROTEIN 18			5.83902e-19	2.32934e-27		2.3009e-20	5.56275e-16
Solyc07g052430.3	black	PF10914 - Protein of unknown function (DUF2781) (DUF2781)			0.0188319				0.0487325
Solyc07g052480.3	black	4.1.3.1 - Isocitrate lyase / Isocitritase			0.0218169	1.60503e-06		4.26595e-06
Solyc07g053530.1	black	PTHR32077//PTHR32077:SF6 - FAMILY NOT NAMED // FASCICLIN-LIKE ARABINOGALACTAN PROTEIN 13-RELATED				0.00681515
Solyc07g053630.3	black	PTHR31312:SF1 - TRANSCRIPTION ACTIVATOR GLK1-RELATED			0.0289184	2.2769e-06		8.02724e-07
Solyc07g053880.2	black	PTHR33021:SF45 - EARLY NODULIN-LIKE PROTEIN 3-RELATED			0.00104061	0.0114811		0.0342175	0.00575544
Solyc07g054820.3	black	PTHR34793:SF1 - PROTEIN THYLAKOID FORMATION 1, CHLOROPLASTIC			0.0190554				0.0127452
Solyc07g054950.2	black	PTHR10177//PTHR10177:SF188 - CYCLINE // CYCLIN-D6-1-RELATED			0.0468386	0.00215382
Solyc07g056020.3	black	PTHR23115//PTHR23115:SF138 - TRANSLATION FACTOR // TRANSLATION INITIATION FACTOR IF-2, CHLOROPLASTIC			3.88685e-11	2.57496e-12		5.22694e-17	2.51179e-10
Solyc07g056540.3	black	PTHR10578//PTHR10578:SF70 - S -2-HYDROXY-ACID OXIDASE-RELATED // PEROXISOMAL (S)-2-HYDROXY-ACID OXIDASE GLO5			4.59972e-13	8.98021e-12		7.67053e-09	1.74748e-13
Solyc07g061900.3	black	PTHR10746//PTHR10746:SF10 - 50S RIBOSOMAL PROTEIN L4 // 50S RIBOSOMAL PROTEIN L4, CHLOROPLASTIC			1.12365e-20	4.50118e-19		1.6109e-43	1.89771e-35
Solyc07g062060.3	black	PTHR10173//PTHR10173:SF38 - METHIONINE SULFOXIDE REDUCTASE // PEPTIDE METHIONINE SULFOXIDE REDUCTASE B1, CHLOROPLASTIC			3.67977e-06	0.000141101		0.00142171	9.38724e-06
Solyc07g062190.3	black	K02871 - large subunit ribosomal protein L13 (RP-L13, MRPL13, rplM)			6.78752e-40	1.19607e-50		7.4166e-82	1.15314e-47
Solyc07g062870.3	black	K02968 - small subunit ribosomal protein S20 (RP-S20, rpsT)			2.66769e-37	8.94345e-42		6.03803e-51	5.9986e-44
Solyc07g063040.3	black	4.2.1.109 - Methylthioribulose 1-phosphate dehydratase / 1-PMT-ribulose dehydratase			0.0128324				0.00343847
Solyc07g063140.1	black	K02435 - aspartyl-tRNA(Asn)/glutamyl-tRNA(Gln) amidotransferase subunit C (gatC, GATC)			0.0101165	0.0417791
Solyc07g063950.3	black	PTHR27003//PTHR27003:SF26 - FAMILY NOT NAMED // CALCIUM/CALMODULIN-REGULATED RECEPTOR-LIKE KINASE			7.25838e-25	2.11899e-24		9.36312e-34	1.30785e-28
Solyc07g063970.3	black				0.00582611	0.0202236			0.0101029
Solyc07g064760.2	black				0.0134512
Solyc07g065080.3	black				1.08086e-12	1.68558e-11		2.57159e-09	3.07787e-11
Solyc07g065340.1	black	PTHR23416//PTHR23416:SF56 - SIALIC ACID SYNTHASE-RELATED // SERINE ACETYLTRANSFERASE 1, CHLOROPLASTIC-RELATED			0.000113045	0.001516		0.00012933	7.8146e-06
Solyc07g065530.1	black				0.000426116	4.34305e-07		3.37567e-07	0.00148887
Solyc07g065870.3	black	PF02631 - RecX family (RecX)						0.0306564	0.0261821
Solyc07g066150.1	black	K08905 - photosystem I subunit V (psaG)			6.16336e-07	5.50419e-08		3.70689e-12	4.40708e-08
Solyc07g066610.3	black	PTHR11406:SF8 - PHOSPHOGLYCERATE KINASE 1, CHLOROPLASTIC-RELATED			3.93712e-16	8.056e-15		3.5238e-10	4.00688e-15
Solyc08g006640.3	black	PTHR21015:SF28 - MONOGALACTOSYLDIACYLGLYCEROL SYNTHASE 1, CHLOROPLASTIC			0.0164923			0.00734298	0.0145015
Solyc08g006870.3	black	PTHR32370:SF7 - BTB/POZ DOMAIN-CONTAINING PROTEIN NPY1				0.0368408
Solyc08g006930.3	black	K02698 - photosystem I subunit X (psaK)			1.99062e-19	2.25374e-32		3.16296e-49	6.68443e-22
Solyc08g007010.3	black	K09015 - Fe-S cluster assembly protein SufD (sufD)			0.0121037	0.0300716		0.0102286
Solyc08g007040.3	black	K02437 - glycine cleavage system H protein (gcvH, GCSH)			9.97594e-79	1.77801e-89		4.89386e-125	1.20409e-78
Solyc08g007180.3	black	PTHR14154//PTHR14154:SF14 - UPF0041 BRAIN PROTEIN 44-RELATED // SUBFAMILY NOT NAMED			6.22265e-11	5.21978e-19		1.62493e-16	1.04649e-09
Solyc08g007380.3	black	2.7.7.5 - Sulfate adenylyltransferase (ADP) / ADP-sulfurylase						0.0499486
Solyc08g007770.3	black	PTHR31867:SF2 - EXPANSIN-A18-RELATED							0.0205794
Solyc08g007950.3	black	PTHR23270:SF7 - NUCLEIC ACID-BINDING, OB-FOLD-LIKE PROTEIN			0.000103683	4.53877e-06		0.000808868	0.00228327
Solyc08g007970.3	black	KOG4421 - Uncharacterized conserved protein			0.0271967
Solyc08g008273.1	black				1.14889e-05	0.000403324		0.00132737	0.000311079
Solyc08g008610.3	black	3.7.1.9 - 2-hydroxymuconate-6-semialdehyde hydrolase / 2-hydroxymuconate-semialdehyde hydrolase			9.51559e-05	9.54465e-06		0.000810025	0.00247669
Solyc08g013670.3	black	K02701 - photosystem I subunit PsaN (psaN)			4.58708e-18	4.00118e-21		8.11084e-28	1.76899e-21
Solyc08g013940.3	black	K17545 - serine/threonine-protein kinase ULK4 [EC:2.7.11.1] (ULK4)			0.0237017				0.0476937
Solyc08g014350.1	black	PTHR34124:SF2 - F16B3.27 PROTEIN			0.0192478	0.0425146
Solyc08g014430.3	black	PTHR23213//PTHR23213:SF220 - FORMIN-RELATED // SUBFAMILY NOT NAMED			0.000221079	0.000293676		0.00343235	0.00260751
Solyc08g015620.3	black				8.25515e-06	2.64953e-12		5.86143e-12	0.00012251
Solyc08g016750.3	black	PTHR11624:SF76 - PYRUVATE DEHYDROGENASE E1 COMPONENT SUBUNIT BETA-2, CHLOROPLASTIC-RELATED			5.83974e-06	6.09961e-14		7.15654e-12	3.3784e-05
Solyc08g041870.3	black	K00811 - aspartate aminotransferase, chloroplastic (ASP5)			0.0311306
Solyc08g043170.3	black	1.2.1.41//2.7.2.11 - Glutamate-5-semialdehyde dehydrogenase / Glutamyl-gamma-semialdehyde dehydrogenase // Glutamate 5-kinase / Gamma-glutamyl kinase				0.0445207		0.0280299
Solyc08g043180.3	black				1.03699e-08	2.28803e-07		3.71194e-12	4.57591e-09
Solyc08g061610.3	black	K01533 - Cu2+-exporting ATPase (copB)	0.0444957			0.00722102
Solyc08g062290.3	black		0.00653587		0.0372459	4.93128e-05	0.0446678	0.000945233
Solyc08g062610.3	black	PTHR10108//PTHR10108:SF791 - METHYLTRANSFERASE // (S)-COCLAURINE-N-METHYLTRANSFERASE-RELATED			0.00635577	0.0169224		0.0188904	0.00379477
Solyc08g062680.1	black	PF13359 - DDE superfamily endonuclease (DDE_Tnp_4)			0.013047
Solyc08g065140.1	black	PF03168 - Late embryogenesis abundant protein (LEA_2)			0.000221079	0.00557139		0.000990183	0.00116537
Solyc08g065850.1	black				1.87426e-10	1.60097e-09		8.6079e-09	3.87474e-11
Solyc08g066180.3	black	3.1.3.23 - Sugar-phosphatase			0.000124728	4.10131e-05		2.68415e-05	0.000112978
Solyc08g066850.3	black	PTHR10374//PTHR10374:SF21 - LACTOYLGLUTATHIONE LYASE GLYOXALASE I // SUBFAMILY NOT NAMED						0.00142376
Solyc08g067030.3	black	PF04862 - Protein of unknown function (DUF642) (DUF642)			2.23999e-08	1.37246e-11		3.9008e-13	1.48304e-08
Solyc08g067320.2	black	PTHR21649//PTHR21649:SF25 - CHLOROPHYLL A/B BINDING PROTEIN // SUBFAMILY NOT NAMED			0.00436083	6.54342e-10		7.89164e-16	0.00409671
Solyc08g067670.3	black							0.0389734	0.00240017
Solyc08g068250.3	black	PF00069//PF01694 - Protein kinase domain (Pkinase) // Rhomboid family (Rhomboid)			0.000935629	0.013662		0.0346428	0.00173941
Solyc08g069010.3	black	PF00571//PF01535//PF13041//PF13812 - CBS domain (CBS) // PPR repeat (PPR) // PPR repeat family (PPR_2) // Pentatricopeptide repeat domain (PPR_3)			0.00171277	5.65568e-05		0.000151183	0.00388228
Solyc08g069030.3	black	4.2.1.24 - Porphobilinogen synthase / Delta-aminolevulinic acid dehydratase			0.00408835	0.0409696			0.00405532
Solyc08g069230.3	black	PTHR10168//PTHR10168:SF87 - GLUTAREDOXIN // SUBFAMILY NOT NAMED			8.82149e-17	7.13784e-15		1.85551e-15	9.94544e-18
Solyc08g075240.3	black	K17756 - long-chain-alcohol oxidase (FAO3)						0.00600596	0.0482449
Solyc08g075750.3	black	PTHR10381//PTHR10381:SF24 - ATP-DEPENDENT CLP PROTEASE PROTEOLYTIC SUBUNIT // SUBFAMILY NOT NAMED	0.0378801		4.35686e-05	3.47735e-13		4.12902e-21	0.000132356
Solyc08g076060.3	black	PF01453//PF07714//PF08276//PF11883 - D-mannose binding lectin (B_lectin) // Protein tyrosine kinase (Pkinase_Tyr) // PAN-like domain (PAN_2) // Domain of unknown function (DUF3403) (DUF3403)			1.9744e-05	5.31063e-06		0.00220826	0.000615056
Solyc08g076300.3	black	PTHR24096:SF253 - 4-COUMARATE--COA LIGASE-LIKE 6			7.03406e-11	1.16927e-11		1.48815e-10	5.462e-10
Solyc08g076470.3	black	K00630 - glycerol-3-phosphate O-acyltransferase (ATS1)			1.41108e-14	9.57457e-25		1.71846e-22	1.40961e-13
Solyc08g076885.1	black				1.40404e-08	1.44114e-07		2.08172e-09	1.24434e-10
Solyc08g077050.3	black	PTHR19370:SF109 - FERREDOXIN C2			1.38823e-14	7.59865e-20		4.7199e-17	2.53086e-12
Solyc08g077880.3	black	PTHR14154//PTHR14154:SF14 - UPF0041 BRAIN PROTEIN 44-RELATED // SUBFAMILY NOT NAMED			6.83878e-14	8.15089e-45		3.58274e-68	8.43807e-14
Solyc08g077890.3	black	PTHR10381:SF25 - ATP-DEPENDENT CLP PROTEASE PROTEOLYTIC SUBUNIT-RELATED PROTEIN 4, CHLOROPLASTIC			2.06293e-06	5.33416e-06		7.25006e-08	6.5664e-06
Solyc08g078010.3	black	PTHR15680:SF10 - 50S RIBOSOMAL PROTEIN L19-1, CHLOROPLASTIC-RELATED			7.91926e-25	9.42442e-34		1.87597e-50	4.59285e-28
Solyc08g078020.1	black				1.00744e-05	1.03845e-05		8.67364e-11	1.87313e-08
Solyc08g078400.3	black	PTHR10909:SF250 - PEROXISOMAL ACYL-COENZYME A OXIDASE 2			0.0201835
Solyc08g078640.2	black	PTHR31321//PTHR31321:SF19 - FAMILY NOT NAMED // PECTINESTERASE 68-RELATED			0.0342936
Solyc08g078910.2	black				6.46286e-09	7.59363e-06		1.58053e-08	5.95774e-13
Solyc08g079060.3	black	PF00923//PF02358 - Transaldolase (Transaldolase) // Trehalose-phosphatase (Trehalose_PPase)			0.00386483	0.0108349			0.0365964
Solyc08g079090.3	black	PTHR11709:SF82 - MONOCOPPER OXIDASE-LIKE PROTEIN SKU5			3.09308e-07	4.33247e-16		8.63519e-40	5.58045e-09
Solyc08g079100.3	black	PF04690 - YABBY protein (YABBY)			0.0262506
Solyc08g079235.1	black	PTHR31080:SF2 - F23N19.14-RELATED			0.0436352
Solyc08g079240.3	black				0.000122076	0.00204489		2.04204e-05	2.405e-06
Solyc08g079620.3	black	PTHR10381:SF15 - ATP-DEPENDENT CLP PROTEASE PROTEOLYTIC SUBUNIT-RELATED PROTEIN 2, CHLOROPLASTIC			1.13838e-08	5.46932e-09		1.58225e-12	4.78783e-08
Solyc08g079660.3	black	PTHR11638//PTHR11638:SF105 - ATP-DEPENDENT CLP PROTEASE // SUBFAMILY NOT NAMED			2.29715e-11	1.88378e-11		1.21255e-15	1.15178e-13
Solyc08g080340.3	black	K13519 - lysophospholipid acyltransferase (LPT1, ALE1)				0.0468535		0.0364451
Solyc08g081250.3	black	3.4.11.14 - Cytosol alanyl aminopeptidase / Soluble alanyl aminopeptidase			2.46204e-10	1.51884e-16		9.36753e-18	7.93745e-10
Solyc08g081770.3	black	PTHR12608//PTHR12608:SF6 - TRANSMEMBRANE PROTEIN HTP-1 RELATED // GDT1-LIKE PROTEIN 1, CHLOROPLASTIC			9.57099e-07	2.07503e-06		1.28987e-15	2.25817e-09
Solyc08g081940.3	black	PF00069//PF00560//PF08263 - Protein kinase domain (Pkinase) // Leucine Rich Repeat (LRR_1) // Leucine rich repeat N-terminal domain (LRRNT_2)			0.0435806				0.030353
Solyc08g082070.3	black	K09273 - upstream-binding transcription factor (UBTF)			0.00229282	0.000102319		0.000412452	0.00684163
Solyc08g082530.3	black	PTHR23076:SF71 - CELL DIVISION PROTEIN ISOLOG			0.000324266	0.000336579		2.48356e-05	0.000853439
Solyc08g082570.3	black				1.90554e-16	5.85975e-20		2.24804e-22	8.40468e-19
Solyc08g082685.1	black	PTHR21011:SF1 - 28S RIBOSOMAL PROTEIN S6, MITOCHONDRIAL			3.58514e-06	0.000272395		5.82535e-15	7.61019e-09
Solyc08g082740.3	black	K03105 - signal recognition particle subunit SRP19 (SRP19)			0.0158638			0.0415679	0.0212319
Solyc08g083140.3	black	2.3.1.84 - Alcohol O-acetyltransferase / AATASE			0.000128637	0.000310064		7.19649e-06	0.00222073
Solyc08g083330.2	black	PTHR19308//PTHR19308:SF12 - PHOSPHATIDYLCHOLINE TRANSFER PROTEIN // SUBFAMILY NOT NAMED			1.7791e-18	4.17707e-21		1.81176e-23	3.20383e-18
Solyc08g083350.3	black	PTHR11661//PTHR11661:SF7 - 60S RIBOSOMAL PROTEIN L12 // 50S RIBOSOMAL PROTEIN L11, CHLOROPLASTIC-RELATED			7.79466e-20	2.84325e-19		4.045e-23	4.28531e-21
Solyc09g005620.3	black	PTHR10293//PTHR10293:SF45 - GLUTAREDOXIN-RELATED PROTEIN // MONOTHIOL GLUTAREDOXIN-S16, CHLOROPLASTIC			1.27615e-17	4.15006e-25		4.76792e-19	2.00966e-14
Solyc09g005980.3	black	K12896 - splicing factor, arginine/serine-rich 7 (SFRS7)			0.0135829	0.0135429
Solyc09g006000.3	black	K06940 - uncharacterized protein (K06940)			0.0471316	0.0116711		0.0377419
Solyc09g007190.3	black	PTHR28630//PTHR28630:SF5 - FAMILY NOT NAMED // THIOREDOXIN-LIKE PROTEIN AAED1, CHLOROPLASTIC			6.44534e-05	0.00178212		0.0123152	0.000487765
Solyc09g007510.2	black	PTHR27007:SF47 - L-TYPE LECTIN-DOMAIN CONTAINING RECEPTOR KINASE VIII.1-RELATED			0.0295006
Solyc09g007560.3	black	K02931 - large subunit ribosomal protein L5 (RP-L5, MRPL5, rplE)			1.65706e-12	4.07538e-09		2.42204e-10	1.32239e-08
Solyc09g008160.3	black				0.0001132	5.32876e-05		3.27125e-09	5.0823e-07
Solyc09g008270.3	black	PF13301 - Protein of unknown function (DUF4079) (DUF4079)			7.64073e-05	3.30848e-07		4.31348e-05	0.000865563
Solyc09g008920.3	black	PTHR12001//PTHR12001:SF41 - GERANYLGERANYL PYROPHOSPHATE SYNTHASE // HETERODIMERIC GERANYLGERANYL PYROPHOSPHATE SYNTHASE SMALL SUBUNIT, CHLOROPLASTIC			0.0328656	0.000942405		0.00144451
Solyc09g009010.3	black	K13680 - beta-mannan synthase [EC:2.4.1.32] Man b1-4 Man (CSLA)			1.48312e-05	0.000491626		0.0171521	0.000153533
Solyc09g009440.2	black	PTHR10072//PTHR10072:SF51 - IRON-SULFUR CLUSTER ASSEMBLY PROTEIN // SUBFAMILY NOT NAMED							0.0164267
Solyc09g009700.3	black	PTHR22835//PTHR22835:SF216 - ZINC FINGER FYVE DOMAIN CONTAINING PROTEIN // SUBFAMILY NOT NAMED			2.49322e-07	7.6565e-06		0.000365784	2.24641e-06
Solyc09g009860.1	black	PTHR10168:SF79 - EMB|CAB85507.1			0.00900365	0.0320628			0.0180942
Solyc09g010930.3	black	PTHR14194//PTHR14194:SF78 - NITROGEN METABOLIC REGULATION PROTEIN NMR-RELATED // SUBFAMILY NOT NAMED			1.86515e-08	1.9995e-08		1.7542e-08	3.39969e-08
Solyc09g011210.3	black	PF00076 - RNA recognition motif. (a.k.a. RRM, RBD, or RNP domain) (RRM_1)			0.016093
Solyc09g011300.3	black	K00761 - uracil phosphoribosyltransferase (upp, UPRT)			4.16679e-07	9.40599e-09		4.62304e-09	2.75809e-07
Solyc09g011305.1	black							0.00442284
Solyc09g011550.3	black					0.00286017		0.0424382
Solyc09g011840.1	black	PF00139 - Legume lectin domain (Lectin_legB)			0.024538
Solyc09g013100.3	black	PF14237 - Domain of unknown function (DUF4339) (DUF4339)			1.48256e-06	1.40232e-07		4.82756e-08	1.0361e-05
Solyc09g014480.2	black	PTHR27000//PTHR27000:SF136 - FAMILY NOT NAMED // POLYGALACTURONASE INHIBITOR 1-RELATED			0.00128139	0.00934347		0.000758572	1.35452e-05
Solyc09g014520.3	black	K08915 - light-harvesting complex II chlorophyll a/b binding protein 4 (LHCB4)			6.59092e-10	7.73051e-11		3.87548e-11	5.06432e-13
Solyc09g014760.3	black	K04040 - chlorophyll synthase (chlG, bchG)			6.58252e-13	7.56865e-21		5.86418e-18	6.06476e-11
Solyc09g014970.3	black	PTHR10992:SF784 - ALPHA-HYDROXYNITRILE LYASE-RELATED				0.00853557
Solyc09g015830.2	black	PTHR27003//PTHR27003:SF53 - FAMILY NOT NAMED // RECEPTOR-LIKE PROTEIN KINASE FERONIA			0.00112629	0.00688123		3.18098e-06	3.28305e-05
Solyc09g031920.1	black	PTHR31852//PTHR31852:SF43 - FAMILY NOT NAMED // LATE EMBRYOGENESIS ABUNDANT HYDROXYPROLINE-RICH GLYCOPROTEIN				0.00207637		0.00187221
Solyc09g055930.3	black	PTHR11709:SF58 - PROTEIN SKU5-LIKE 3			0.000207301	0.0070619		0.010296	0.000795973
Solyc09g056260.3	black	PTHR11142:SF9 - TRNA PSEUDOURIDINE SYNTHASE			0.0320059
Solyc09g061390.1	black	PTHR34811//PTHR34811:SF1 - FAMILY NOT NAMED // MATURASE K			0.0373283	0.0109516		0.0137561	0.0408999
Solyc09g061420.3	black	PF12452 - Protein of unknown function (DUF3685) (DUF3685)			1.56948e-18	5.19515e-20		1.1281e-17	3.06234e-17
Solyc09g061450.1	black	PTHR11205:SF22 - 30S RIBOSOMAL PROTEIN S7, CHLOROPLASTIC			6.65486e-07	1.44588e-07		5.15018e-05	4.85968e-05
Solyc09g062970.1	black				9.34125e-10	1.63103e-07		2.34868e-07	1.42462e-10
Solyc09g063130.3	black	K02693 - photosystem I subunit IV (psaE)			8.63422e-06	7.2712e-08		1.86314e-14	2.42182e-08
Solyc09g064500.3	black	K08903 - photosystem II 13kDa protein (psb28)			1.52575e-43	1.78402e-76		5.63546e-107	8.65278e-46
Solyc09g064660.3	black	K11087 - small nuclear ribonucleoprotein D1 (SNRPD1, SMD1)			0.0120133	0.0156806		0.0204124	0.00443217
Solyc09g065180.3	black	PTHR10366//PTHR10366:SF278 - NAD DEPENDENT EPIMERASE/DEHYDRATASE // CHLOROPLAST STEM-LOOP BINDING PROTEIN OF 41 KDA A, CHLOROPLASTIC							0.0192834
Solyc09g065270.3	black	PTHR20982:SF8 - RIBOSOME-RECYCLING FACTOR, CHLOROPLASTIC		0.0453579	0.000421999	0.000679855		1.01816e-06	5.57065e-07
Solyc09g065300.3	black				0.000234355	0.00394106		0.0121328	0.000195662
Solyc09g066100.3	black	PTHR11467:SF48 - HISTONE H1.1-RELATED				1.92116e-07		6.44458e-06
Solyc09g072750.2	black		0.0483699			2.41541e-05		2.46664e-06
Solyc09g072770.1	black				1.38813e-06	4.44543e-09		1.43106e-05	0.000134707
Solyc09g072990.3	black	PTHR35095:SF1 - F15K9.6			0.0242649
Solyc09g074260.1	black	PF00560//PF08263 - Leucine Rich Repeat (LRR_1) // Leucine rich repeat N-terminal domain (LRRNT_2)			0.0264191
Solyc09g074420.3	black	PTHR22939:SF83 - PROTEASE DO-LIKE 2, CHLOROPLASTIC			1.58351e-07	5.07992e-07		1.20626e-10	1.48177e-08
Solyc09g074570.1	black	PTHR10168//PTHR10168:SF57 - GLUTAREDOXIN // GLUTAREDOXIN-C13-RELATED			0.0452731
Solyc09g074880.3	black	PTHR17130//PTHR17130:SF20 - MITOCHONDRIAL OUTER MEMBRANE PROTEIN 25 // PROTEIN LOW PSII ACCUMULATION 1, CHLOROPLASTIC			7.42448e-08	3.64363e-12		7.34643e-13	4.88637e-07
Solyc09g075180.3	black	PTHR11455:SF2 - BLUE-LIGHT PHOTORECEPTOR PHR2			3.11724e-15	2.39159e-18		4.12986e-27	2.12554e-14
Solyc09g075550.3	black	K00770 - 1,4-beta-D-xylan synthase (E2.4.2.24)			0.00649062	0.0239881		0.033788	0.0163708
Solyc09g075750.1	black	PTHR33312//PTHR33312:SF5 - FAMILY NOT NAMED // MEMBRANE-ASSOCIATED KINASE REGULATOR 1-RELATED			0.0261791
Solyc09g075930.2	black	PTHR10638//PTHR10638:SF40 - COPPER AMINE OXIDASE // AMINE OXIDASE			0.0225635				0.0402223
Solyc09g076020.3	black	4.2.1.19 - Imidazoleglycerol-phosphate dehydratase			0.0300688	5.336e-05		0.00168991
Solyc09g082580.3	black	PTHR31351:SF4 - GENOMIC DNA, CHROMOSOME 3, P1 CLONE: MWI23-RELATED							0.0250441
Solyc09g083120.3	black	3.4.19.1 - Acylaminoacyl-peptidase / N-acylpeptide hydrolase						0.00621523	0.00180528
Solyc09g083190.3	black	PTHR36399:SF1 - NAD(P)H DEHYDROGENASE 18			2.90682e-25	1.52167e-29		1.33855e-26	1.86111e-23
Solyc09g083380.3	black	PTHR11467//PTHR11467:SF44 - HISTONE H1/H5 // SUBFAMILY NOT NAMED			3.61373e-05	0.00039602		7.70976e-06	4.63488e-08
Solyc09g089690.3	black	PTHR10209//PTHR10209:SF122 - OXIDOREDUCTASE, 2OG-FE II OXYGENASE FAMILY PROTEIN // 1-AMINOCYCLOPROPANE-1-CARBOXYLATE OXIDASE HOMOLOG 10-RELATED			0.0108718			0.0239439	0.0237446
Solyc09g090410.3	black	PTHR13528:SF6 - 50S RIBOSOMAL PROTEIN L28, CHLOROPLASTIC			1.91311e-15	2.52081e-17		6.13827e-32	1.42616e-20
Solyc09g090460.3	black	PTHR11702//PTHR11702:SF28 - DEVELOPMENTALLY REGULATED GTP-BINDING PROTEIN-RELATED // PROTEIN, PUTATIVE-RELATED			8.55511e-06	1.06624e-06		2.20446e-05	3.4982e-05
Solyc09g090960.3	black	KOG0131 - Splicing factor 3b, subunit 4			1.05532e-11	4.42107e-10		2.47613e-13	1.58395e-13
Solyc09g091250.3	black	PTHR10071:SF212 - GATA TRANSCRIPTION FACTOR 1				0.0274365		0.0438541
Solyc09g091390.3	black				3.12181e-07	1.06992e-06		3.73183e-05	1.04923e-05
Solyc09g091490.2	black	K15601 - lysine-specific demethylase 3 [EC:1.14.11.-] (KDM3)							0.0385209
Solyc09g092170.2	black	PTHR23421:SF69 - BETA-GALACTOSIDASE 9				0.0411905
Solyc09g092710.3	black	PF07172 - Glycine rich protein family (GRP)			0.00138536	0.0204569		1.22313e-06	6.42312e-06
Solyc09g097865.1	black	PF06548//PF12711 - Kinesin-related (Kinesin-related) // Kinesin motor (Kinesin-relat_1)			0.014555	0.0164647		0.0387448	0.0477758
Solyc09g097900.3	black	PTHR24073//PTHR24073:SF394 - FAMILY NOT NAMED // RAS-RELATED PROTEIN RABA5B-RELATED			2.47418e-05	0.000103483		0.000608806	0.000496811
Solyc10g005030.3	black	K12130 - pseudo-response regulator 5 (PRR5)			0.0179623			0.0405497	0.0195123
Solyc10g005110.3	black	1.3.3.3 - Coproporphyrinogen oxidase / Coproporphyrinogenase			2.42608e-08	5.13293e-10		1.82028e-18	6.04214e-10
Solyc10g005180.3	black				3.46302e-14	6.52952e-13		2.51743e-21	5.1891e-14
Solyc10g005260.3	black	PTHR24012//PTHR24012:SF333 - FAMILY NOT NAMED // POLYADENYLATE-BINDING PROTEIN RBP45B-RELATED			0.000249933	0.00398834		0.00029922	1.27367e-05
Solyc10g005670.2	black	K02553 - regulator of ribonuclease activity A (rraA, menG)			0.00120967	5.72435e-05		0.000628834	0.01108
Solyc10g005770.3	black	PTHR24351//PTHR24351:SF87 - RIBOSOMAL PROTEIN S6 KINASE // SUBFAMILY NOT NAMED			0.0372445	0.0116916
Solyc10g005830.3	black				0.0192251
Solyc10g005870.3	black	PTHR10516//PTHR10516:SF250 - PEPTIDYL-PROLYL CIS-TRANS ISOMERASE // PEPTIDYL-PROLYL CIS-TRANS ISOMERASE FKBP16-1, CHLOROPLASTIC			1.20445e-06	4.48985e-05		0.0025169	4.24327e-05
Solyc10g006030.3	black	PTHR11700//PTHR11700:SF9 - 30S RIBOSOMAL PROTEIN S10 FAMILY MEMBER // 37S RIBOSOMAL PROTEIN S10, MITOCHONDRIAL			1.22005e-19	3.21761e-19		6.42405e-55	4.44231e-33
Solyc10g006040.1	black	PTHR23416//PTHR23416:SF56 - SIALIC ACID SYNTHASE-RELATED // SERINE ACETYLTRANSFERASE 1, CHLOROPLASTIC-RELATED			9.49281e-06	0.000276283		0.00111603	8.50857e-05
Solyc10g006230.3	black	PTHR21649//PTHR21649:SF13 - CHLOROPHYLL A/B BINDING PROTEIN // LHCA2 PROTEIN			1.62906e-08	1.38534e-22		7.0493e-30	2.54446e-08
Solyc10g006400.3	black	PTHR10314//PTHR10314:SF98 - SER/THR DEHYDRATASE, TRP SYNTHASE // TRYPTOPHAN SYNTHASE BETA CHAIN 1, CHLOROPLASTIC-RELATED			1.10434e-08	3.48637e-07		8.4645e-07	2.95952e-09
Solyc10g006530.3	black	PTHR33399:SF2 - PSBQ-LIKE PROTEIN 2, CHLOROPLASTIC			0.000331858	3.77506e-07		5.71807e-06	0.00417062
Solyc10g006560.3	black	PTHR23430 - HISTONE H2A			0.00028986	0.000792394		0.000346494	0.000134953
Solyc10g007300.2	black				0.0253498	0.00516708		0.00950987
Solyc10g007320.3	black	PTHR21091//PTHR21091:SF105 - METHYLTETRAHYDROFOLATE:HOMOCYSTEINE METHYLTRANSFERASE RELATED // UROPORPHYRINOGEN DECARBOXYLASE 1, CHLOROPLASTIC			4.79629e-20	1.25878e-21		1.34017e-28	2.56305e-21
Solyc10g007600.3	black	PTHR10578//PTHR10578:SF70 - S -2-HYDROXY-ACID OXIDASE-RELATED // PEROXISOMAL (S)-2-HYDROXY-ACID OXIDASE GLO5			6.80415e-08	2.89145e-05		1.62476e-06	5.62636e-08
Solyc10g007690.3	black	K08909 - light-harvesting complex I chlorophyll a/b binding protein 3 (LHCA3)			8.04803e-05	4.80867e-09		9.72731e-10	0.000359827
Solyc10g008740.3	black	K03405 - magnesium chelatase subunit I (chlI, bchI)			9.6502e-08	8.26734e-08		4.03246e-11	8.33201e-09
Solyc10g008910.1	black	K11253 - histone H3 (H3)			8.42374e-07	6.18492e-10		7.15014e-13	9.18646e-08
Solyc10g008980.3	black	PTHR11132//PTHR11132:SF124 - SOLUTE CARRIER FAMILY 35 // SUBFAMILY NOT NAMED			0.00308189	0.00239847		0.0019454	0.00293805
Solyc10g009190.1	black				6.75291e-06	3.70869e-05		9.0941e-06	4.32223e-06
Solyc10g009570.3	black	K17525 - chitinase domain-containing protein 1 (CHID1)			2.17709e-13	1.80064e-18		7.3206e-24	5.78511e-11
Solyc10g011770.3	black	PTHR33222//PTHR33222:SF4 - FAMILY NOT NAMED // PROTEIN CURVATURE THYLAKOID 1A, CHLOROPLASTIC			2.90797e-28	5.26755e-27		1.21781e-36	1.13351e-30
Solyc10g017890.1	black	K02689 - photosystem I P700 chlorophyll a apoprotein A1 (psaA)			7.59089e-05	0.000156615		0.000419744	0.000173065
Solyc10g018300.2	black	2.2.1.1 - Transketolase / Glycoaldehyde transferase			1.07104e-15	7.1342e-23		2.75782e-42	1.51122e-14
Solyc10g031560.1	black	PTHR19376//PTHR19376:SF38 - DNA-DIRECTED RNA POLYMERASE // DNA-DIRECTED RNA POLYMERASE SUBUNIT BETA''				0.0254245
Solyc10g037890.2	black				0.0219233
Solyc10g038130.2	black	PTHR21562:SF5 - PECTINACETYLESTERASE FAMILY PROTEIN				0.0240475
Solyc10g039270.2	black	PTHR10516:SF178 - PEPTIDYL-PROLYL CIS-TRANS ISOMERASE FKBP20-2, CHLOROPLASTIC			2.53265e-07	1.02445e-05		0.000308044	1.8127e-06
Solyc10g044640.2	black	KOG2922 - Uncharacterized conserved protein			0.0452971
Solyc10g047530.2	black	PTHR32370:SF6 - ROOT PHOTOTROPISM PROTEIN 3			0.00347057	0.0108752			0.0387699
Solyc10g047560.2	black	PTHR10334//PTHR10334:SF223 - CYSTEINE-RICH SECRETORY PROTEIN-RELATED // F2J10.6 PROTEIN-RELATED	0.0120578		0.0206084	1.24758e-13
Solyc10g047930.2	black	1.8.4.12 - Peptide-methionine (R)-S-oxide reductase / Selenoprotein R			6.36136e-19	3.70925e-18		8.78194e-23	4.55844e-17
Solyc10g051095.1	black	PTHR14194:SF71 - PRESTALK A DIFFERENTIATION PROTEIN A			1.95193e-09	1.4237e-08		3.26528e-09	1.91452e-10
Solyc10g051310.2	black	PTHR10381:SF8 - ATP-DEPENDENT CLP PROTEASE PROTEOLYTIC SUBUNIT 6, CHLOROPLASTIC			2.36102e-13	5.81491e-18		1.37901e-17	3.32627e-13
Solyc10g051380.2	black	PTHR24012//PTHR24012:SF308 - FAMILY NOT NAMED // PROTEIN Y55F3AM.3, ISOFORM A				5.6428e-06	0.00145942	1.45116e-10	5.7889e-06
Solyc10g055630.2	black	PTHR19139//PTHR19139:SF152 - AQUAPORIN TRANSPORTER // AQUAPORIN PIP2-7			1.47562e-06	1.36812e-14		3.14745e-24	3.07325e-07
Solyc10g055680.1	black	2.1.1.142//2.1.1.143 - Cycloartenol 24-C-methyltransferase / Sterol C-methyltransferase // 24-methylenesterol C-methyltransferase / SMT(2)			7.58457e-05	0.0013727		0.0118489	0.000659929
Solyc10g074920.2	black	PTHR31451:SF17 - MANNAN ENDO-1,4-BETA-MANNOSIDASE 6			2.00898e-11	1.56045e-30		1.73455e-38	1.00764e-09
Solyc10g075020.2	black	K02356 - elongation factor P (efp)			2.30073e-07	9.88279e-06		2.70956e-11	2.22299e-08
Solyc10g076360.1	black	PTHR19317//PTHR19317:SF14 - PRENYLATED RAB ACCEPTOR 1-RELATED // PRA1 FAMILY PROTEIN B4-RELATED			0.026205	0.0371605			0.0444606
Solyc10g077040.2	black	1.14.13.81 - Magnesium-protoporphyrin IX monomethyl ester (oxidative) cyclase / Mg-protoporphyrin IX monomethyl ester oxidative cyclase			6.27787e-22	1.55895e-60		5.45274e-96	8.27161e-22
Solyc10g077120.2	black	K02723 - photosystem II PsbY protein (psbY)			3.67745e-09	3.91582e-09		5.23295e-11	1.65397e-09
Solyc10g078560.2	black				0.0307503
Solyc10g078580.1	black	PTHR34114//PTHR34114:SF2 - FAMILY NOT NAMED // ARABINOGALACTAN PEPTIDE 12-RELATED			2.06948e-07	1.2461e-05		1.80493e-12	5.85797e-19
Solyc10g079770.2	black	K14674 - TAG lipase / steryl ester hydrolase / phospholipase A2 / LPA acyltransferase (TGL4)			0.00776525			0.00172178	0.000297936
Solyc10g079970.2	black	KOG4491 - Predicted membrane protein			0.0428617
Solyc10g080190.1	black	PF06592 - Protein of unknown function (DUF1138) (DUF1138)			4.8186e-07	6.57769e-06		5.92934e-06	8.16122e-07
Solyc10g080260.2	black	PTHR14493//PTHR14493:SF47 - UNCHARACTERIZED // ZINC FINGER CCCH DOMAIN-CONTAINING PROTEIN 56						0.00624557
Solyc10g080340.2	black	PTHR11206//PTHR11206:SF102 - MULTIDRUG RESISTANCE PROTEIN // MATE EFFLUX FAMILY PROTEIN			0.0390214
Solyc10g081510.2	black	2.1.1.14 - 5-methyltetrahydropteroyltriglutamate--homocysteine S-methyltransferase / Tetrahydropteroylglutamate-homocysteine transmethylase			1.7082e-08	8.59184e-21		1.30258e-18	9.34309e-07
Solyc10g081650.2	black	K09835 - prolycopene isomerase (crtISO, crtH)			2.69048e-05	3.73931e-05		1.01775e-06	0.00044029
Solyc10g081680.1	black				0.0140995			0.00147082	0.000169923
Solyc10g081830.2	black	K10739 - replication factor A2 (RFA2, RPA2)			0.0194646	0.0221209
Solyc10g081970.2	black	PTHR31415:SF4 - HARPIN-INDUCED PROTEIN-LIKE-RELATED			0.00514625	0.00376876		0.0104972	0.00513515
Solyc10g082030.2	black	K03386 - peroxiredoxin (alkyl hydroperoxide reductase subunit C) [EC:1.11.1.15] (E1.11.1.15, PRDX, ahpC)			2.8488e-37	1.25888e-57		1.65018e-97	1.37616e-40
Solyc10g083170.2	black	1.1.1.331 - Secoisolariciresinol dehydrogenase			2.5901e-09	4.26808e-08		3.73063e-14	4.73154e-15
Solyc10g083290.2	black		0.000613136			2.42217e-05	0.000998943	7.32589e-05
Solyc10g083650.1	black	PTHR10430//PTHR10430:SF16 - PEROXIREDOXIN // PEROXIREDOXIN-5, MITOCHONDRIAL			9.21642e-10	3.27401e-11		4.17497e-22	9.11598e-12
Solyc10g083795.1	black	K09837 - carotene epsilon-monooxygenase (LUT1, CYP97C1)			4.90408e-07	5.37533e-06		8.63116e-05	2.33127e-06
Solyc10g083970.1	black	PTHR11964:SF15 - S-ADENOSYLMETHIONINE SYNTHASE 3			0.0339515				0.0316393
Solyc10g084380.1	black	PF03106 - WRKY DNA -binding domain (WRKY)			0.00932305				0.0451557
Solyc10g085080.2	black				0.0161424
Solyc10g085555.1	black	PTHR11902//PTHR11902:SF19 - ENOLASE // SUBFAMILY NOT NAMED			4.64302e-06	5.11631e-05		8.05505e-07	4.63592e-07
Solyc10g086090.2	black	PF00280 - Potato inhibitor I family (potato_inhibit)			0.0456331	1.01331e-06		0.00061128
Solyc10g086550.2	black	K08956 - AFG3 family protein [EC:3.4.24.-] (AFG3)			0.00360634	0.0401107			0.0233299
Solyc10g086570.3	black				3.30419e-21	1.55882e-27		2.29717e-30	2.60586e-20
Solyc10g086660.2	black	PTHR33101:SF1 - ROP GUANINE NUCLEOTIDE EXCHANGE FACTOR 7			0.0201289
Solyc11g005620.1	black	2.7.2.8 - Acetylglutamate kinase							0.0316985
Solyc11g006040.2	black	PTHR27001//PTHR27001:SF164 - FAMILY NOT NAMED // RECEPTOR PROTEIN KINASE TMK1-RELATED			3.56508e-06	4.03598e-05		6.27688e-11	3.63252e-08
Solyc11g007680.2	black				1.08103e-06	8.66698e-05		0.000779137	3.00572e-06
Solyc11g007960.2	black	PTHR23244//PTHR23244:SF321 - KELCH REPEAT DOMAIN // KELCH REPEAT-CONTAINING PROTEIN 1-RELATED			0.00217288	0.000306535		0.000413523	0.0241142
Solyc11g007990.2	black	1.1.1.82 - Malate dehydrogenase (NADP(+)) / NADP-linked malate dehydrogenase			6.41105e-05	0.000695786		0.0153496	0.00136911
Solyc11g008140.2	black	PTHR31683//PTHR31683:SF11 - FAMILY NOT NAMED // PECTIN LYASE-LIKE SUPERFAMILY PROTEIN-RELATED				0.00214737
Solyc11g008480.2	black	PTHR31407//PTHR31407:SF16 - FAMILY NOT NAMED // PSBP DOMAIN-CONTAINING PROTEIN 7, CHLOROPLASTIC			0.00926307	0.000266824		0.000770573	0.0434935
Solyc11g008620.2	black	3.1.3.18 - Phosphoglycolate phosphatase			8.40185e-34	1.88853e-47		3.3574e-55	2.22152e-35
Solyc11g008810.2	black	PTHR22600//PTHR22600:SF18 - BETA-HEXOSAMINIDASE // SUBFAMILY NOT NAMED				0.0323807		0.0458146
Solyc11g008870.2	black	1.5.1.20 - Methylenetetrahydrofolate reductase (NAD(P)H) / N(5,10)-methylenetetrahydrofolate reductase			5.7575e-07	3.98829e-06		0.000140584	9.16958e-06
Solyc11g008990.2	black	K03969 - phage shock protein A (pspA)			2.2094e-12	3.27217e-11		4.24262e-12	2.01445e-15
Solyc11g009020.2	black	PTHR18901//PTHR18901:SF30 - 2-DEOXYGLUCOSE-6-PHOSPHATE PHOSPHATASE 2 // SUBFAMILY NOT NAMED			2.8775e-25	1.42185e-30		6.28785e-25	1.57071e-22
Solyc11g009090.2	black	K14396 - polyadenylate-binding protein 2 (PABPN1, PABP2)						0.0116111	0.0364963
Solyc11g010240.2	black	PF00125//PF12070 - Core histone H2A/H2B/H3/H4 (Histone) // Protein of unknown function (DUF3550/UPF0682) (DUF3550)			0.00486672	0.0265652			0.00698208
Solyc11g010480.2	black	PTHR33222:SF2 - PROTEIN CURVATURE THYLAKOID 1D, CHLOROPLASTIC			0.000243867	8.24509e-08		2.18058e-08	0.000300283
Solyc11g010920.2	black	PTHR24115:SF339 - DI-GLUCOSE BINDING PROTEIN WITH KINESIN MOTOR DOMAIN			0.0326932	0.00177165		0.0485705
Solyc11g011010.1	black	PTHR12701:SF12 - GB|AAF26109.1	3.00357e-09		0.0110769	3.35637e-24	1.75835e-07	6.30495e-22
Solyc11g011250.2	black	KOG1422 - Intracellular Cl- channel CLIC, contains GST domain			2.26447e-11	1.58585e-09		1.26089e-11	6.53343e-11
Solyc11g011260.1	black	PTHR31636//PTHR31636:SF47 - FAMILY NOT NAMED // DELLA PROTEIN RGL1-RELATED	0.00972785		0.0390456	1.62532e-05	0.0347829	0.000110688
Solyc11g011650.1	black	K14488 - SAUR family protein (SAUR)			0.0376265
Solyc11g011660.2	black				0.000875007	0.00806913		0.0055866	0.000625974
Solyc11g012020.2	black	K12483 - EH domain-containing protein 1 (EHD1)			0.00208131	0.0132349			0.00897318
Solyc11g012280.2	black				2.70605e-06	3.19128e-05		1.19211e-11	7.58234e-08
Solyc11g012360.2	black	K14445 - solute carrier family 13 (sodium-dependent dicarboxylate transporter), member 2/3/5 (SLC13A2_3_5)			7.98028e-10	3.83754e-12		1.57242e-13	2.54846e-09
Solyc11g012620.2	black	PF01426 - BAH domain (BAH)				0.038765
Solyc11g012640.1	black	PF05421 - Protein of unknown function (DUF751) (DUF751)			0.00123102	0.010118		5.99368e-05	0.00119225
Solyc11g013740.2	black	PTHR10751//PTHR10751:SF44 - GUANYLATE BINDING PROTEIN // SUBFAMILY NOT NAMED			0.000541014	0.00187291			0.00782705
Solyc11g017200.2	black	2.4.1.255 - Protein O-GlcNAc transferase / OGTase			1.00338e-05	8.87223e-07		6.43742e-08	7.132e-05
Solyc11g017440.2	black	PTHR23201//PTHR23201:SF20 - EXTENSIN, PROLINE-RICH PROTEIN // GIBBERELLIN-REGULATED PROTEIN 14-RELATED			0.0410374			0.0139754
Solyc11g018550.3	black	PTHR31356//PTHR31356:SF1 - FAMILY NOT NAMED // L-ASCORBATE PEROXIDASE S, CHLOROPLASTIC/MITOCHONDRIAL-RELATED			2.01687e-06	2.9787e-05		0.00378948	0.000110526
Solyc11g020960.2	black	PF02428 - Potato type II proteinase inhibitor family (Prot_inhib_II)			4.95971e-05	1.60139e-10		2.46701e-08	0.000586039
Solyc11g021290.2	black	PF05758 - Ycf1 (Ycf1)			0.00137225	0.0142655			0.00282194
Solyc11g021300.1	black	PF05758 - Ycf1 (Ycf1)			4.98749e-07	1.02225e-05		7.38005e-06	9.51907e-07
Solyc11g040270.1	black				0.0158051	0.0173979
Solyc11g040390.2	black	K12524 - bifunctional aspartokinase / homoserine dehydrogenase 1 (thrA)				0.0411434	0.0164107	0.00377611
Solyc11g042920.2	black					0.0379339
Solyc11g044660.1	black				0.000535944	0.000850127		0.0264461	0.00651039
Solyc11g065190.2	black	K06688 - ubiquitin-conjugating enzyme E2 C (UBE2C, UBC11)			1.51811e-06	1.88661e-10		1.22859e-12	5.85833e-06
Solyc11g065760.2	black	2.7.1.21 - Thymidine kinase						0.0351958	0.0359034
Solyc11g065830.2	black	PTHR10283:SF76 - DICARBOXYLATE TRANSPORTER 1, CHLOROPLASTIC			1.16343e-09	2.64353e-12		1.14159e-106	1.5134e-17
Solyc11g065900.2	black	K10735 - GINS complex subunit 4 (GINS4, SLD5)			0.00391346	0.039599			0.0374118
Solyc11g066110.2	black	PTHR12428//PTHR12428:SF19 - OXA1 // INNER MEMBRANE PROTEIN ALBINO3, CHLOROPLASTIC			4.7506e-13	5.46647e-18		4.81328e-21	2.9082e-12
Solyc11g066300.2	black	PTHR31846//PTHR31846:SF5 - FAMILY NOT NAMED // CRS2-ASSOCIATED FACTOR 2, CHLOROPLASTIC			0.03661
Solyc11g066390.2	black	PTHR10003//PTHR10003:SF34 - SUPEROXIDE DISMUTASE CU-ZN -RELATED // SUPEROXIDE DISMUTASE [CU-ZN] 2, CHLOROPLASTIC			6.36852e-18	3.82614e-56		6.37157e-102	2.00963e-18
Solyc11g066410.2	black	PTHR21368//PTHR21368:SF18 - 50S RIBOSOMAL PROTEIN L9 // 39S RIBOSOMAL PROTEIN L9, MITOCHONDRIAL			6.1437e-17	2.38567e-20		6.57869e-39	5.35919e-23
Solyc11g066950.2	black	PF07876 - Stress responsive A/B Barrel Domain (Dabb)			4.6756e-09	1.72945e-18		4.29623e-19	2.15283e-08
Solyc11g068515.1	black				6.69794e-05	1.22424e-05		5.58912e-10	1.95129e-09
Solyc11g068530.1	black	PF11250 - Fantastic Four meristem regulator (FAF)			0.00726956				0.017795
Solyc11g068765.1	black				0.0447265			0.0340663	0.00728828
Solyc11g068790.2	black	KOG4526 - Predicted membrane protein			9.51511e-06	0.000188005		6.27877e-05	2.07333e-06
Solyc11g068820.2	black	K02899 - large subunit ribosomal protein L27 (RP-L27, MRPL27, rpmA)			4.46048e-25	2.8826e-30		7.38602e-38	2.83558e-23
Solyc11g069270.2	black	PTHR23421:SF58 - BETA-GALACTOSIDASE 8			2.37965e-05	0.000298518		0.0149547	0.000936686
Solyc11g069380.2	black	1.17.7.1 - (E)-4-hydroxy-3-methylbut-2-enyl-diphosphate synthase (ferredoxin) / 4-hydroxy-3-methylbut-2-en-1-yl diphosphate synthase			2.82148e-12	5.71816e-12		4.57915e-10	1.03947e-10
Solyc11g069990.2	black	PF00931//PF13855 - NB-ARC domain (NB-ARC) // Leucine rich repeat (LRR_8)			0.0347882
Solyc11g070100.2	black	K12125 - protein EARLY FLOWERING 3 (ELF3)			0.00633128	0.0202508			0.0422885
Solyc11g071540.2	black	PF11781 - RNA polymerase I-specific transcription initiation factor Rrn7 (RRN7)			0.0173573
Solyc11g071700.2	black	K11838 - ubiquitin carboxyl-terminal hydrolase 7 (USP7, UBP15)			0.00101814	0.0104827			0.0123395
Solyc11g071890.2	black	PTHR12815//PTHR12815:SF10 - SORTING AND ASSEMBLY MACHINERY SAM50 PROTEIN // OUTER MEMBRANE OMP85 FAMILY PROTEIN			0.0113742	0.00315932
Solyc11g072080.1	black	PF00646//PF01344 - F-box domain (F-box) // Kelch motif (Kelch_1)			0.000121	0.00026467		0.000156341	5.65012e-05
Solyc11g072170.2	black	K03834 - tyrosine-specific transport protein (tyrP)				0.044483
Solyc11g072280.2	black	PTHR19321:SF7 - 65-KDA MICROTUBULE-ASSOCIATED PROTEIN 3-RELATED			0.0149527
Solyc11g073160.2	black	PTHR21327//PTHR21327:SF7 - GTP CYCLOHYDROLASE II-RELATED // MONOFUNCTIONAL RIBOFLAVIN BIOSYNTHESIS PROTEIN RIBA 3, CHLOROPLASTIC				0.0492378
Solyc12g005270.2	black	K11251 - histone H2A (H2A)			4.44738e-05	5.65974e-05		4.44933e-05	3.81938e-05
Solyc12g006140.2	black	K08913 - light-harvesting complex II chlorophyll a/b binding protein 2 (LHCB2)			7.65081e-22	1.49442e-50		1.19979e-58	1.65559e-20
Solyc12g006180.2	black	K14411 - RNA-binding protein Musashi (MSI)			0.00154914	0.00728682			0.0176982
Solyc12g006500.1	black	PTHR11132//PTHR11132:SF80 - SOLUTE CARRIER FAMILY 35 // SUBFAMILY NOT NAMED			0.0468887			0.0386991	0.00121371
Solyc12g006820.2	black					0.0333518		0.0408147	0.0043356
Solyc12g008980.2	black	5.5.1.18 - Lycopene epsilon-cyclase			0.0266595			0.0134319	0.00826742
Solyc12g009070.1	black				9.10364e-17	6.14819e-16		9.84119e-18	3.29504e-18
Solyc12g009200.2	black	PTHR21649//PTHR21649:SF5 - CHLOROPHYLL A/B BINDING PROTEIN // SUBFAMILY NOT NAMED			1.7097e-14	8.74701e-23		1.55659e-23	1.98522e-13
Solyc12g009250.2	black	PTHR10772//PTHR10772:SF0 - 10 KDA HEAT SHOCK PROTEIN // 20 KDA CHAPERONIN, CHLOROPLASTIC			1.48423e-05	7.19251e-09		1.55201e-20	2.51832e-05
Solyc12g009270.1	black	3.1.1.11 - Pectinesterase / Pectin methylesterase			0.00220932	6.79495e-05		4.93144e-05	0.0266658
Solyc12g009400.2	black	K00161 - pyruvate dehydrogenase E1 component alpha subunit (PDHA, pdhA)			0.0410717
Solyc12g009570.2	black	PTHR24343//PTHR24343:SF157 - SERINE/THREONINE KINASE // CBL-INTERACTING SERINE/THREONINE-PROTEIN KINASE 24			0.00145922	0.00212304			0.01662
Solyc12g009600.2	black	PTHR35742//PTHR35742:SF1 - FAMILY NOT NAMED // THYLAKOID LUMENAL 16.5 KDA PROTEIN, CHLOROPLASTIC			1.34184e-06	1.14993e-11		2.53802e-29	6.58971e-08
Solyc12g009650.2	black	PF14547 - Hydrophobic seed protein (Hydrophob_seed)			0.00708351	0.0014001		1.18417e-11	8.16243e-07
Solyc12g009860.2	black				0.0233619				0.0464221
Solyc12g010230.2	black	PTHR32254//PTHR32254:SF5 - FAMILY NOT NAMED // CALCINEURIN-LIKE METALLO-PHOSPHOESTERASE SUPERFAMILY PROTEIN			2.28808e-05	5.65308e-06		3.24419e-05	0.000892056
Solyc12g010980.2	black	2.3.1.224 - Acetyl-CoA-benzylalcohol acetyltransferase			3.09377e-07	3.45818e-11		1.47266e-15	2.57939e-07
Solyc12g011280.2	black	K08909 - light-harvesting complex I chlorophyll a/b binding protein 3 (LHCA3)			3.16033e-17	1.08788e-26		2.60127e-47	5.79024e-20
Solyc12g011450.2	black	K08914 - light-harvesting complex II chlorophyll a/b binding protein 3 (LHCB3)			2.31827e-07	3.4292e-14		1.6691e-20	3.30773e-08
Solyc12g013580.2	black	PTHR11071//PTHR11071:SF174 - PEPTIDYL-PROLYL CIS-TRANS ISOMERASE // PEPTIDYL-PROLYL CIS-TRANS ISOMERASE CYP37, CHLOROPLASTIC			1.53243e-08	2.43166e-14		3.55715e-34	1.82477e-09
Solyc12g014380.2	black	PTHR11469//PTHR11469:SF1 - GLUCOSE-6-PHOSPHATE ISOMERASE // GLUCOSE-6-PHOSPHATE ISOMERASE, CYTOSOLIC			0.000702954	0.000145415		5.02638e-09	0.00320105
Solyc12g014393.1	black				3.04297e-08	2.59285e-06		0.000141667	6.18537e-07
Solyc12g015910.1	black	PTHR12735//PTHR12735:SF22 - BOLA-LIKE PROTEIN-RELATED // SUBFAMILY NOT NAMED			0.00267158	0.0201656			0.012745
Solyc12g017420.2	black	PTHR11384:SF3 - INNER MEMBRANE ABC TRANSPORTER ATP-BINDING PROTEIN YDDA-RELATED			5.93057e-07	8.28891e-06		9.03931e-06	3.00733e-07
Solyc12g019010.2	black	K03183 - demethylmenaquinone methyltransferase / 2-methoxy-6-polyprenyl-1,4-benzoquinol methylase (ubiE)						0.0138154	0.0389536
Solyc12g019110.2	black	K01873 - valyl-tRNA synthetase (VARS, valS)			3.60492e-14	9.69594e-20		6.56594e-29	8.76598e-13
Solyc12g019550.2	black				4.56719e-12	5.6766e-23		7.10144e-36	6.90351e-11
Solyc12g021340.2	black	PTHR12231//PTHR12231:SF150 - CTX-RELATED TYPE I TRANSMEMBRANE PROTEIN // RHODANESE-LIKE DOMAIN-CONTAINING PROTEIN 11, CHLOROPLASTIC			9.34125e-10	2.80692e-16		5.56666e-17	5.09651e-09
Solyc12g027770.2	black	PTHR22778//PTHR22778:SF18 - OVARIAN CANCER GENE-2 PROTEIN-RELATED // RHODANESE-LIKE DOMAIN-CONTAINING PROTEIN 8, CHLOROPLASTIC			0.00332972	5.1689e-05		1.74251e-06	0.0196074
Solyc12g035280.1	black	PTHR24012//PTHR24012:SF426 - FAMILY NOT NAMED // RNA-BINDING PROTEIN-RELATED			1.16102e-05	4.45887e-09		3.55992e-09	0.000379389
Solyc12g038820.1	black	PTHR19288//PTHR19288:SF3 - 4-NITROPHENYLPHOSPHATASE-RELATED // SUBFAMILY NOT NAMED			0.00123529	0.0099493			0.00658051
Solyc12g042065.1	black	KOG2170 - ATPase of the AAA+ superfamily			9.51179e-06	2.4448e-06		4.40277e-20	4.08472e-08
Solyc12g042230.2	black	PF00006//PF00306 - ATP synthase alpha/beta family, nucleotide-binding domain (ATP-synt_ab) // ATP synthase alpha/beta chain, C terminal domain (ATP-synt_ab_C)				0.0114458	0.0408474	0.000411916	0.00127453
Solyc12g042470.2	black	1.1.1.334 - Methylecgonone reductase			1.82423e-05	4.90749e-07		2.99504e-08	3.30132e-05
Solyc12g042580.2	black	PF02298 - Plastocyanin-like domain (Cu_bind_like)			0.0324443
Solyc12g043110.2	black	PTHR19375//PTHR19375:SF190 - HEAT SHOCK PROTEIN 70KDA // SUBFAMILY NOT NAMED			0.0232652
Solyc12g044270.2	black	PTHR33101//PTHR33101:SF10 - FAMILY NOT NAMED // RHO GUANINE NUCLEOTIDE EXCHANGE FACTOR 8-RELATED			9.18291e-05	0.000281749		0.0137429	0.00178188
Solyc12g044280.2	black	K02695 - photosystem I subunit VI (psaH)			2.25419e-23	2.82287e-34		2.8161e-45	4.02065e-24
Solyc12g044860.2	black	PTHR24031//PTHR24031:SF219 - RNA HELICASE // ATP-DEPENDENT RNA HELICASE DDX5-RELATED	0.0199386			0.0306514
Solyc12g049280.2	black	PTHR14194//PTHR14194:SF44 - NITROGEN METABOLIC REGULATION PROTEIN NMR-RELATED // SUBFAMILY NOT NAMED			0.0194614	0.0412078
Solyc12g055750.2	black	PF01699//PF04627 - Sodium/calcium exchanger protein (Na_Ca_ex) // Mitochondrial ATP synthase epsilon chain (ATP-synt_Eps)			0.0463075			0.00379892	0.000268184
Solyc12g055850.2	black	2.3.1.135 - Phosphatidylcholine--retinol O-acyltransferase / Retinyl ester synthase			0.0440471
Solyc12g055920.2	black	PTHR23056//PTHR23056:SF50 - CALCINEURIN B // SUBFAMILY NOT NAMED			0.0330179
Solyc12g055970.2	black	PTHR22298:SF19 - ENDOGLUCANASE 19-RELATED			7.9223e-08	6.08435e-09		1.17784e-10	3.85235e-08
Solyc12g056150.2	black	PF03417 - Acyl-coenzyme A:6-aminopenicillanic acid acyl-transferase (AAT)			0.000611123	0.00312657		0.00580556	0.00403566
Solyc12g056300.2	black	PF07714//PF08263 - Protein tyrosine kinase (Pkinase_Tyr) // Leucine rich repeat N-terminal domain (LRRNT_2)			0.0171594
Solyc12g056540.1	black	K11253 - histone H3 (H3)						0.0280473	0.0105293
Solyc12g056620.2	black	PTHR14154//PTHR14154:SF12 - UPF0041 BRAIN PROTEIN 44-RELATED // SUBFAMILY NOT NAMED			8.28623e-11	1.61789e-10		3.11087e-07	2.75847e-09
Solyc12g056830.1	black	K02113 - F-type H+-transporting ATPase subunit delta (ATPF1D, atpH)			3.98257e-12	2.27626e-11		3.79233e-08	2.127e-12
Solyc12g057140.1	black	PTHR36321:SF1 - CLASSICAL ARABINOGALACTAN PROTEIN 10-RELATED			6.57603e-05	0.000195634		0.00154765	0.00114941
Solyc12g070270.2	black	3.6.3.43 - Peptide-transporting ATPase	0.0186868		0.00380903	5.77163e-07		0.000230911	0.0421869
Solyc12g088970.1	black	PTHR24298//PTHR24298:SF172 - FAMILY NOT NAMED // CYTOCHROME P450 82C2-RELATED				0.00351981
Solyc12g089180.2	black	PTHR23500//PTHR23500:SF43 - FAMILY NOT NAMED // SUGAR TRANSPORTER ERD6-LIKE 4-RELATED			0.027546	0.00276285		0.00170669
Solyc12g089210.2	black	2.1.3.3 - Ornithine carbamoyltransferase / OTCase			5.03577e-06	9.63466e-06		3.47137e-07	2.03184e-07
Solyc12g094430.1	black	PTHR11260//PTHR11260:SF287 - GLUTATHIONE S-TRANSFERASE, GST, SUPERFAMILY, GST DOMAIN CONTAINING // SUBFAMILY NOT NAMED			0.0011516	0.00242965		0.000856145	0.000422587
Solyc12g094480.2	black								0.0403083
Solyc12g094580.2	black				8.78961e-12	1.36493e-19		4.43306e-20	4.30664e-10
Solyc12g094720.2	black	PTHR31407//PTHR31407:SF17 - FAMILY NOT NAMED // PSBP DOMAIN-CONTAINING PROTEIN 3, CHLOROPLASTIC			1.21647e-08	4.8467e-07		3.50622e-11	3.17662e-09
Solyc12g095870.2	black	K08850 - aurora kinase, other [EC:2.7.11.1] (AURKX)			0.00257712	0.0211858			0.0232566
Solyc12g096390.2	black	PTHR11717//PTHR11717:SF2 - LOW MOLECULAR WEIGHT PROTEIN TYROSINE PHOSPHATASE // PEPTIDYL-TRNA HYDROLASE PTRHD1-RELATED			0.00542632	0.0487458			0.0488834
Solyc12g096500.2	black	PTHR31319//PTHR31319:SF10 - FAMILY NOT NAMED // ZINC FINGER PROTEIN CONSTANS-RELATED				0.00794793		0.000114978	0.038302
Solyc12g096780.2	black	K07512 - mitochondrial trans-2-enoyl-CoA reductase (MECR, NRBF1)			4.94922e-05	1.67626e-06		5.06332e-05	0.000682665
Solyc12g096820.1	black	PTHR11926:SF279 - UDP-GLYCOSYLTRANSFERASE 74C1-RELATED			0.00993198	0.0335033			0.0214705
Solyc12g098130.1	black				0.0122862	0.0274563
Solyc12g098230.1	black				4.06737e-05	0.000489469		0.000636874	8.13576e-06
Solyc12g098890.2	black	K02881 - large subunit ribosomal protein L18 (RP-L18, MRPL18, rplR)			5.91492e-21	1.15937e-26		2.80467e-73	1.05373e-28
Solyc12g099000.2	black	PTHR11964:SF16 - S-ADENOSYLMETHIONINE SYNTHASE 4			9.38753e-05	1.01949e-06	0.0170771	7.21565e-35	6.16243e-06
Solyc12g099570.2	black							0.00234244	2.55714e-05
Solyc12g099650.2	black				4.5471e-08	1.19468e-11		6.31209e-11	1.20964e-07
Solyc12g099800.2	black	PF00581//PF13616 - Rhodanese-like domain (Rhodanese) // PPIC-type PPIASE domain (Rotamase_3)			0.00310135	0.0357767		0.0223606	0.00490233
Solyc12g100160.2	black	PTHR11655//PTHR11655:SF14 - 60S/50S RIBOSOMAL PROTEIN L6/L9 // 54S RIBOSOMAL PROTEIN L6, MITOCHONDRIAL			4.25218e-19	1.02079e-28		2.65212e-49	3.403e-21
ENSRNA050029927	black				0.0240635	0.0351794
ENSRNA050030143	black				0.0405159
ENSRNA050030463	black				0.0401092
Solyc00g006800.3	blue	2.2.1.2 - Transaldolase / Glycerone transferase			0.00201331	0.00483169			0.0211533
Solyc00g007220.3	blue	PTHR14155//PTHR14155:SF187 - RING FINGER DOMAIN-CONTAINING // SUBFAMILY NOT NAMED							0.0360028
Solyc00g009120.3	blue	K11168 - dehydrogenase/reductase SDR family member 12 (DHRS12)			0.00999417	0.00603712		0.00996597	0.00706705
Solyc00g009140.3	blue	K11168 - dehydrogenase/reductase SDR family member 12 (DHRS12)			0.0279402			0.0019755	0.00613751
Solyc00g026160.3	blue	PTHR11972//PTHR11972:SF62 - NADPH OXIDASE // FERRIC REDUCTION OXIDASE 4-RELATED			0.0360459	8.493e-05		0.00819303
Solyc00g052940.3	blue	PF00892 - EamA-like transporter family (EamA)			5.81334e-12	3.48059e-11		8.13401e-12	6.69852e-10
Solyc00g164680.2	blue	2.5.1.54 - 3-deoxy-7-phosphoheptulonate synthase / Phospho-2-oxo-3-deoxyheptonate aldolase				0.0241152		0.0381768
Solyc01g005000.3	blue	4.1.1.15 - Glutamate decarboxylase / L-glutamate 1-carboxy-lyase			1.6087e-05	0.000102776		6.96614e-05	0.000143413
Solyc01g005010.3	blue				6.47805e-06	0.000149856		0.00896343	0.000264943
Solyc01g005090.3	blue	PTHR11200//PTHR11200:SF63 - INOSITOL 5-PHOSPHATASE // DNASE I-LIKE SUPERFAMILY PROTEIN				0.023333
Solyc01g005520.3	blue	PTHR17130//PTHR17130:SF24 - MITOCHONDRIAL OUTER MEMBRANE PROTEIN 25 // GAN			8.55544e-21	8.99806e-34		2.50991e-32	8.03687e-20
Solyc01g005590.2	blue				2.06011e-28	1.259e-28		7.17585e-41	5.31344e-36
Solyc01g006120.3	blue	PTHR11909:SF146 - CASEIN KINASE-LIKE PROTEIN			6.47625e-05	7.25635e-05		0.000604873	0.000557467
Solyc01g006190.3	blue	PTHR10315//PTHR10315:SF45 - SEVEN IN ABSENTIA HOMOLOG // E3 UBIQUITIN-PROTEIN LIGASE			0.00293662	0.00782919			0.0337376
Solyc01g006290.3	blue	PTHR31388:SF28 - PEROXIDASE 58	0.0157449		0.0494415	4.56835e-05		0.000109081
Solyc01g006510.3	blue	1.1.1.14 - L-iditol 2-dehydrogenase / Sorbitol dehydrogenase			1.19309e-09	1.02583e-08		2.96796e-10	3.08403e-08
Solyc01g006720.3	blue	PTHR19241//PTHR19241:SF286 - ATP-BINDING CASSETTE TRANSPORTER // SUBFAMILY NOT NAMED			6.58517e-53	1.75542e-48		1.69669e-55	3.43888e-53
Solyc01g007030.3	blue	PTHR22849//PTHR22849:SF48 - WDSAM1 PROTEIN // SUBFAMILY NOT NAMED			0.000971099	0.00242363
Solyc01g007100.3	blue	K09480 - digalactosyldiacylglycerol synthase (E2.4.1.241)			9.37288e-15	1.60312e-22		4.64125e-22	2.89857e-14
Solyc01g007900.3	blue	PTHR31142//PTHR31142:SF3 - FAMILY NOT NAMED // PROTEIN TOM THREE HOMOLOG 1-RELATED			0.000425619	0.000138901		0.00723404	0.00450034
Solyc01g008100.3	blue				9.0289e-05	0.00147036		0.0214684	0.00165374
Solyc01g008230.3	blue	PTHR31072//PTHR31072:SF7 - FAMILY NOT NAMED // TRANSCRIPTION FACTOR TCP21-RELATED			0.000176307	0.00023908		1.80522e-07	4.80011e-05
Solyc01g008510.3	blue	PTHR34940:SF1 - PHOTOSYSTEM II 5 KDA PROTEIN, CHLOROPLASTIC				0.0382977
Solyc01g008550.3	blue				0.00973101	0.0309272		0.0009483	0.00593682
Solyc01g008840.3	blue	K12176 - COP9 signalosome complex subunit 2 (COPS2, CSN2, TRIP15)			6.35598e-05	0.0014889		0.0112429	0.000185625
Solyc01g008925.1	blue	PTHR15020//PTHR15020:SF11 - FLAVIN REDUCTASE-RELATED // UPF0659 PROTEIN YMR090W			0.000146977	0.00120276			0.00334951
Solyc01g008930.3	blue				0.000117731	0.000580878		0.0341101	0.0027873
Solyc01g009080.3	blue	PTHR23308//PTHR23308:SF29 - NUCLEAR INHIBITOR OF PROTEIN PHOSPHATASE-1 // SUBFAMILY NOT NAMED			2.67392e-34	3.93266e-37		4.49179e-35	1.91214e-32
Solyc01g009245.1	blue	PF11347 - Protein of unknown function (DUF3148) (DUF3148)			7.19863e-10	1.40876e-08		5.65502e-08	8.85122e-08
Solyc01g010640.3	blue	PTHR35688:SF2 - NAD(P)-LINKED OXIDOREDUCTASE-LIKE PROTEIN			4.56575e-32	4.69852e-60		2.96628e-89	1.26122e-31
Solyc01g011095.1	blue	PTHR34277//PTHR34277:SF2 - FAMILY NOT NAMED // CLAVATA3/ESR (CLE)-RELATED PROTEIN 26			0.0292374
Solyc01g014103.1	blue				1.2901e-15	9.84127e-13		5.53257e-14	1.25203e-16
Solyc01g017087.1	blue	K02963 - small subunit ribosomal protein S18 (RP-S18, MRPS18, rpsR)			9.89648e-21	3.19134e-27		1.65537e-33	2.21908e-23
Solyc01g017440.1	blue	PTHR32108:SF0 - DNA-DIRECTED RNA POLYMERASE SUBUNIT ALPHA			0.000583628	3.18222e-05		0.00025848	0.00242625
Solyc01g028805.1	blue	KOG0157 - Cytochrome P450 CYP4/CYP19/CYP26 subfamilies			1.16217e-35	2.9447e-33		1.71696e-47	6.86961e-54
Solyc01g049650.3	blue	PTHR11817//PTHR11817:SF5 - PYRUVATE KINASE // PYRUVATE KINASE-RELATED			6.2839e-05	0.000327943		1.44755e-05	1.07963e-05
Solyc01g056690.3	blue	PTHR23257:SF382 - PROTEIN KINASE AND PP2C-LIKE DOMAIN-CONTAINING PROTEIN			1.76593e-12	1.59082e-09		1.87671e-05	9.85192e-10
Solyc01g057210.3	blue	2.7.11.2 - [Pyruvate dehydrogenase (acetyl-transferring)] kinase / Pyruvate dehydrogenase kinase (phosphorylating)			7.86255e-14	2.65938e-11		9.0356e-10	1.85063e-14
Solyc01g058260.3	blue	PTHR10682//PTHR10682:SF20 - POLY A POLYMERASE // POLY(A) POLYMERASE			1.12406e-08	6.23659e-07		2.53453e-09	3.0276e-13
Solyc01g058720.3	blue	PTHR10891//PTHR10891:SF629 - EF-HAND CALCIUM-BINDING DOMAIN CONTAINING PROTEIN // SUBFAMILY NOT NAMED			8.33788e-65	5.06387e-73		1.15234e-78	5.02976e-68
Solyc01g059870.3	blue				1.38026e-15	9.77658e-14		8.72795e-12	9.1727e-15
Solyc01g060140.3	blue	PTHR23335//PTHR23335:SF3 - CALMODULIN-BINDING TRANSCRIPTION ACTIVATOR CAMTA // CALMODULIN-BINDING TRANSCRIPTION ACTIVATOR 5-RELATED			1.92109e-08	3.01151e-06		7.81727e-06	7.89615e-08
Solyc01g060415.1	blue	PTHR21726//PTHR21726:SF29 - PHOSPHATIDYLINOSITOL N-ACETYLGLUCOSAMINYLTRANSFERASE SUBUNIT P DOWN SYNDROME CRITICAL REGION PROTEIN 5 -RELATED // F1O19.10 PROTEIN			0.0367862
Solyc01g066680.3	blue	PTHR34458:SF5 - POLLEN OLE E 1 ALLERGEN AND EXTENSIN FAMILY PROTEIN			0.000471251	3.58846e-12		2.00288e-12	0.00207946
Solyc01g066910.3	blue	PF14368 - Probable lipid transfer (LTP_2)			1.9445e-07	9.76511e-07		7.42065e-06	6.86583e-07
Solyc01g067120.3	blue	K03347 - cullin 1 (CUL1, CDC53)			0.00017375	1.34495e-10		7.91922e-10	0.000595366
Solyc01g068280.3	blue	PTHR10799//PTHR10799:SF654 - SWI/SNF-RELATED MATRIX-ASSOCIATED ACTIN-DEPENDENT REGULATOR OF CHROMATIN SUBFAMILY-RELATED // SUBFAMILY NOT NAMED				0.0331374
Solyc01g073650.3	blue	PTHR11668//PTHR11668:SF247 - SERINE/THREONINE PROTEIN PHOSPHATASE // SUBFAMILY NOT NAMED			0.00551443	0.0350331			0.0392938
Solyc01g073680.3	blue	PTHR33044:SF28 - BIFUNCTIONAL INHIBITOR/LIPID-TRANSFER PROTEIN/SEED STORAGE 2S ALBUMIN SUPERFAMILY PROTEIN	0.00521613		1.62669e-10	1.44486e-93		8.35454e-84	2.06935e-08
Solyc01g073950.3	blue	PTHR15398 - BROMODOMAIN-CONTAINING PROTEIN 8			0.0239921				0.0172343
Solyc01g079180.3	blue	K01051 - pectinesterase (E3.1.1.11)			2.24056e-05	0.000615217		0.0078154	0.000359547
Solyc01g079220.3	blue	PTHR11178 - IRON-SULFUR CLUSTER SCAFFOLD PROTEIN NFU-RELATED			0.00159297	0.0113207			0.00587342
Solyc01g079750.3	blue	PTHR24361//PTHR24361:SF315 - MITOGEN-ACTIVATED KINASE KINASE KINASE // MAP KINASE KINASE KINASE SSK2-RELATED				0.0355115
Solyc01g079980.3	blue	PTHR13683//PTHR13683:SF380 - ASPARTYL PROTEASES // SUBFAMILY NOT NAMED			0.00156765	7.72576e-05		0.00775532	0.0179293
Solyc01g080050.3	blue	PTHR11514//PTHR11514:SF49 - MYC // TRANSCRIPTION FACTOR MUTE			0.0335639
Solyc01g080240.3	blue	PTHR24055:SF211 - MITOGEN-ACTIVATED PROTEIN KINASE 16-RELATED			7.82401e-06	8.98528e-05		0.00465386	8.40471e-05
Solyc01g080290.3	blue	PTHR33294:SF3 - AWPM-19-LIKE PROTEIN			0.0354168
Solyc01g080520.3	blue	K04733 - interleukin-1 receptor-associated kinase 4 (IRAK4)			0.00763055	0.00566617		0.0132619	0.0135104
Solyc01g080660.3	blue	PTHR23147//PTHR23147:SF7 - SERINE/ARGININE RICH SPLICING FACTOR // SUBFAMILY NOT NAMED				0.0341649
Solyc01g080870.3	blue	PTHR11654//PTHR11654:SF90 - OLIGOPEPTIDE TRANSPORTER-RELATED // PROTEIN NRT1/ PTR FAMILY 7.2			2.24966e-21	6.82312e-25		9.2858e-30	2.01891e-23
Solyc01g081177.1	blue	PTHR11639//PTHR11639:SF62 - S100 CALCIUM-BINDING PROTEIN // SUBFAMILY NOT NAMED			1.96499e-05	1.22319e-08		6.13897e-08	2.98736e-05
Solyc01g081480.3	blue	PTHR15495//PTHR15495:SF17 - NEGATIVE REGULATOR OF VESICLE FORMATION-RELATED // SUBFAMILY NOT NAMED			2.98299e-42	1.00675e-43		7.39786e-58	2.40502e-60
Solyc01g086890.3	blue	K13096 - splicing factor 4 (SF4)			2.59081e-08	5.45769e-07		0.000429755	3.53505e-06
Solyc01g086957.1	blue	PTHR14445//PTHR14445:SF40 - GRB10 INTERACTING GYF PROTEIN // SUBFAMILY NOT NAMED			0.00896913			0.0393576	0.0101818
Solyc01g086970.3	blue	PTHR10634//PTHR10634:SF32 - AN1-TYPE ZINC FINGER PROTEIN // SUBFAMILY NOT NAMED			0.00511064	0.00756616
Solyc01g087050.3	blue	PTHR10593//PTHR10593:SF27 - SERINE/THREONINE-PROTEIN KINASE RIO // SUBFAMILY NOT NAMED						0.0124975
Solyc01g087190.3	blue	PTHR33791:SF4 - CHAPERONIN-LIKE RBCX PROTEIN			2.66108e-15	4.50254e-12		7.5998e-07	2.20569e-11
Solyc01g087260.3	blue	PTHR10543//PTHR10543:SF37 - BETA-CAROTENE DIOXYGENASE // CAROTENOID 9,10(9',10')-CLEAVAGE DIOXYGENASE 1			3.24757e-82	1.37508e-84		1.04405e-85	1.00527e-87
Solyc01g087720.3	blue	PTHR19306//PTHR19306:SF1 - STRUCTURAL MAINTENANCE OF CHROMOSOMES 5,6 SMC5, SMC6 // STRUCTURAL MAINTENANCE OF CHROMOSOMES PROTEIN 5				0.0473905
Solyc01g087740.1	blue	PTHR10795//PTHR10795:SF394 - PROPROTEIN CONVERTASE SUBTILISIN/KEXIN // SUBFAMILY NOT NAMED					0.032641	0.0012687	0.00290443
Solyc01g088000.3	blue				0.0484431
Solyc01g090190.3	blue	KOG2945 - Predicted RNA-binding protein				0.0479334
Solyc01g090880.3	blue	PTHR33317:SF2 - HOLLIDAY JUNCTION RESOLVASE-RELATED			0.0445881				0.015082
Solyc01g091240.3	blue	PF01535//PF12854//PF13041 - PPR repeat (PPR) // PPR repeat (PPR_1) // PPR repeat family (PPR_2)						0.0489183
Solyc01g091260.3	blue	PTHR13105//PTHR13105:SF8 - MYELOID LEUKEMIA FACTOR // SUBFAMILY NOT NAMED			8.54535e-05	0.000895296		0.0387199	0.00248678
Solyc01g091540.2	blue	PTHR31602//PTHR31602:SF3 - FAMILY NOT NAMED // GROWTH-REGULATING FACTOR 9			0.000810401	0.00766886		0.0168187	0.00321887
Solyc01g091580.3	blue	K03110 - fused signal recognition particle receptor (ftsY)				0.00462207		0.0203895
Solyc01g091705.1	blue	PTHR23105//PTHR23105:SF57 - RIBOSOMAL PROTEIN L7AE FAMILY MEMBER // SUBFAMILY NOT NAMED			8.78549e-05	0.00193787		0.0343348	0.00255748
Solyc01g091950.3	blue	PTHR23063:SF9 - LYSOPHOSPHOLIPID ACYLTRANSFERASE LPEAT2			1.61939e-13	2.86194e-18		1.26902e-14	3.96628e-12
Solyc01g094010.3	blue	PTHR23024//PTHR23024:SF113 - MEMBER OF 'GDXG' FAMILY OF LIPOLYTIC ENZYMES // CARBOXYLESTERASE 8-RELATED			1.56992e-07	1.2311e-10		6.45699e-07	7.85623e-06
Solyc01g094030.3	blue	PTHR10774:SF51 - C2 CALCIUM/LIPID-BINDING ENDONUCLEASE/EXONUCLEASE/PHOSPHATASE-RELATED			0.0472027				0.013601
Solyc01g094220.3	blue	K15095 - (+)-neomenthol dehydrogenase (E1.1.1.208)			2.75323e-11	3.05079e-12		2.42151e-15	1.0639e-12
Solyc01g094230.3	blue				0.0255167
Solyc01g094690.3	blue	PTHR19139//PTHR19139:SF169 - AQUAPORIN TRANSPORTER // AQUAPORIN PIP1-4-RELATED			2.8941e-07	4.63749e-13		1.91626e-23	5.48527e-09
Solyc01g094700.3	blue	PTHR15486:SF27 - GLYCEROL-3-PHOSPHATE 2-O-ACYLTRANSFERASE 4-RELATED			4.26922e-89	8.66278e-86		2.73947e-105	2.06272e-95
Solyc01g094720.3	blue	PTHR11662//PTHR11662:SF255 - SODIUM-DEPENDENT PHOSPHATE TRANSPORTERS // ANION TRANSPORTER 2, CHLOROPLASTIC-RELATED			4.58657e-16	5.57742e-17		3.00171e-16	2.45239e-13
Solyc01g094890.3	blue	PTHR11972//PTHR11972:SF41 - NADPH OXIDASE // FERRIC REDUCTION OXIDASE 2-RELATED			0.0257678
Solyc01g095240.3	blue				7.20284e-05	0.000375751		0.0241212	0.00164333
Solyc01g095430.3	blue	PTHR33222//PTHR33222:SF4 - FAMILY NOT NAMED // PROTEIN CURVATURE THYLAKOID 1A, CHLOROPLASTIC			6.66732e-33	1.18872e-76		1.01365e-107	9.26264e-35
Solyc01g095530.2	blue	PTHR33513//PTHR33513:SF4 - FAMILY NOT NAMED // GB|AAF04428.1			4.70449e-09	1.93294e-17		3.71006e-26	4.41373e-10
Solyc01g095560.3	blue				1.32349e-24	2.1667e-33		2.46672e-25	1.20369e-20
Solyc01g095670.3	blue	K17525 - chitinase domain-containing protein 1 (CHID1)			9.92638e-14	1.42249e-17		4.86541e-13	1.13545e-11
Solyc01g095980.3	blue	PTHR31446:SF4 - ACID PHOSPHATASE/VANADIUM-DEPENDENT HALOPEROXIDASE-RELATED PROTEIN			8.02179e-14	4.87892e-13		7.64554e-10	1.14054e-11
Solyc01g096020.3	blue	PTHR10315//PTHR10315:SF34 - SEVEN IN ABSENTIA HOMOLOG // E3 UBIQUITIN-PROTEIN LIGASE SINAT3-RELATED			0.00525101			0.0160314	0.00133191
Solyc01g096630.3	blue				4.18925e-36	1.59769e-33		4.5592e-53	3.55002e-50
Solyc01g096940.3	blue	2.7.11.1 - Non-specific serine/threonine protein kinase / Threonine-specific protein kinase			0.00482657	0.00937521		0.0189853	0.00443532
Solyc01g097340.3	blue	5.1.3.18 - GDP-mannose 3,5-epimerase			5.36647e-86	6.9329e-158		1.04916e-189	4.52161e-81
Solyc01g097570.2	blue				0.00878132				0.0497572
Solyc01g097770.3	blue	PTHR24351//PTHR24351:SF81 - RIBOSOMAL PROTEIN S6 KINASE // PHOTOTROPIN-2			8.4908e-47	9.33078e-48		9.03784e-46	8.0739e-48
Solyc01g097910.2	blue	PF00301 - Rubredoxin (Rubredoxin)			1.49878e-08	2.98051e-08		4.548e-05	1.59504e-06
Solyc01g098080.3	blue	K10406 - kinesin family member C2/C3 (KIFC2_3)			0.0211209	0.0303764
Solyc01g098110.3	blue	PTHR22753//PTHR22753:SF1 - FAMILY NOT NAMED // TRANSMEMBRANE PROTEIN 68			0.00613461	0.0259137			0.0441617
Solyc01g098160.3	blue	PTHR24056//PTHR24056:SF176 - CELL DIVISION PROTEIN KINASE // SUBFAMILY NOT NAMED			0.0108633	0.0492178
Solyc01g098500.3	blue	K08145 - MFS transporter, SP family, solute carrier family 2 (facilitated glucose transporter), member 8 (SLC2A8, GLUT8)	0.0240122		4.05446e-08	2.70358e-24		2.44867e-17	4.74602e-06
Solyc01g098610.3	blue	6.3.2.3 - Glutathione synthase / GSH synthetase			2.05008e-09	2.31283e-07		4.79675e-05	1.93814e-07
Solyc01g098990.3	blue	PF09353 - Domain of unknown function (DUF1995) (DUF1995)			1.29953e-09	5.58383e-13		2.39161e-09	2.01839e-07
Solyc01g099160.3	blue	K15718 - linoleate 9S-lipoxygenase (LOX1_5)				0.0310552
Solyc01g099340.3	blue	PTHR10593//PTHR10593:SF31 - SERINE/THREONINE-PROTEIN KINASE RIO // C2H2-LIKE ZINC FINGER PROTEIN-RELATED			0.000764946	0.0119411		0.0493783	0.0010076
Solyc01g099790.3	blue	PTHR22937//PTHR22937:SF37 - RING FINGER CONTAINING PROTEIN // SUBFAMILY NOT NAMED			0.000161491	0.0008398		0.022379	0.00368734
Solyc01g099820.3	blue	PF04588 - Hypoxia induced protein conserved region (HIG_1_N)			0.00742414			0.0249071	0.00662451
Solyc01g099860.3	blue	PTHR11668:SF262 - SERINE/THREONINE-PROTEIN PHOSPHATASE PP1 ISOZYME 8-RELATED			0.00224473	0.00465926		0.0153111	0.00142813
Solyc01g099870.2	blue	PTHR10791:SF29 - BIDIRECTIONAL SUGAR TRANSPORTER SWEET16-RELATED							0.00628557
Solyc01g099970.3	blue	PTHR24006//PTHR24006:SF442 - FAMILY NOT NAMED // PROTEIN GADR-4			9.49038e-05	0.000494029		0.00988357	0.00215757
Solyc01g100040.3	blue	PTHR13832//PTHR13832:SF198 - PROTEIN PHOSPHATASE 2C // PROTEIN PHOSPHATASE 2C 34-RELATED			1.19057e-06	1.79321e-17		1.1214e-25	3.36238e-06
Solyc01g100390.3	blue	K01507 - inorganic pyrophosphatase (ppa)	0.0480184			0.0489274
Solyc01g100610.3	blue	PTHR11660:SF53 - SOLUTE CARRIER FAMILY 40 MEMBER 3, CHLOROPLASTIC			9.61636e-16	9.66915e-16		5.00413e-15	4.78849e-13
Solyc01g100650.3	blue	PTHR13833//PTHR13833:SF49 - FAMILY NOT NAMED // NHL REPEAT-CONTAINING PROTEIN 2			4.88845e-08	4.94015e-09		9.10602e-09	1.38888e-06
Solyc01g100760.2	blue	PF04398 - Protein of unknown function, DUF538 (DUF538)			1.32462e-52	5.71715e-49		1.60124e-43	1.88739e-48
Solyc01g100770.2	blue	PF04398 - Protein of unknown function, DUF538 (DUF538)			1.80785e-32	2.22271e-43		4.92477e-41	3.95931e-29
Solyc01g100810.3	blue	PTHR31916:SF7 - ALKALINE/NEUTRAL INVERTASE A-RELATED			0.0117982	0.0449868			0.0131301
Solyc01g100910.3	blue	PF00892 - EamA-like transporter family (EamA)			1.91226e-05	0.000238036		0.00219221	6.8412e-05
Solyc01g101060.3	blue	PTHR11964:SF16 - S-ADENOSYLMETHIONINE SYNTHASE 4			0.00303253	0.00674458			0.0309466
Solyc01g101070.3	blue	PTHR19241//PTHR19241:SF259 - ATP-BINDING CASSETTE TRANSPORTER // ABC TRANSPORTER G FAMILY MEMBER 33-RELATED				0.00411538
Solyc01g102350.3	blue	PTHR21562:SF5 - PECTINACETYLESTERASE FAMILY PROTEIN			1.12469e-05	0.000148988		0.0129803	0.000237256
Solyc01g102610.3	blue	1.16.1.7 - Ferric-chelate reductase (NADH) / NADH:Fe(3+)-EDTA reductase			1.08253e-71	2.92168e-70		4.22395e-105	2.79252e-114
Solyc01g102950.3	blue	PTHR32098:SF5 - LYCOPENE BETA/EPSILON CYCLASE PROTEIN			3.54529e-12	5.93722e-12		4.02147e-08	2.54846e-09
Solyc01g102980.3	blue	PTHR31948//PTHR31948:SF19 - FAMILY NOT NAMED // ZINC-FINGER HOMEODOMAIN PROTEIN 3-RELATED			3.09918e-16	4.48958e-14		2.40425e-10	3.40055e-14
Solyc01g103120.3	blue	PTHR11566:SF57 - DYNAMIN-2A-RELATED			0.0411743
Solyc01g104015.1	blue	PF06232 - Embryo-specific protein 3, (ATS3) (ATS3)			7.16047e-41	5.39331e-38		1.05958e-31	3.46721e-36
Solyc01g104050.3	blue	PF00069//PF01571//PF08669 - Protein kinase domain (Pkinase) // Aminomethyltransferase folate-binding domain (GCV_T) // Glycine cleavage T-protein C-terminal barrel domain (GCV_T_C)			0.0274265
Solyc01g104230.3	blue				0.00159298	0.0190594			0.0159334
Solyc01g104710.3	blue				0.000735057	0.00631266			0.00380122
Solyc01g105040.3	blue	PF11955 - Plant organelle RNA recognition domain (PORR)			6.96291e-05	6.95478e-12		7.01218e-16	9.19025e-05
Solyc01g105120.3	blue	PTHR33334//PTHR33334:SF5 - FAMILY NOT NAMED // DENTIN SIALOPHOSPHOPROTEIN-LIKE PROTEIN			2.19059e-72	1.10607e-91		1.72255e-87	8.61132e-70
Solyc01g105290.3	blue				7.20284e-05	2.50144e-05		1.06176e-09	7.71036e-07
Solyc01g105650.3	blue	PTHR10209//PTHR10209:SF167 - OXIDOREDUCTASE, 2OG-FE II OXYGENASE FAMILY PROTEIN // SUBFAMILY NOT NAMED			0.0157621			0.017508	0.0120379
Solyc01g106010.3	blue	PTHR11556//PTHR11556:SF12 - FRUCTOSE-1,6-BISPHOSPHATASE-RELATED // SUBFAMILY NOT NAMED			5.89127e-07	4.2192e-06		0.000741063	5.22053e-05
Solyc01g106480.3	blue	PTHR11540:SF21 - MALATE DEHYDROGENASE, GLYOXYSOMAL			8.79646e-38	2.82281e-35		3.47283e-115	4.77091e-99
Solyc01g106540.3	blue					0.0288946
Solyc01g107470.3	blue	PF05347 - Complex 1 protein (LYR family) (Complex1_LYR)							0.00221344
Solyc01g107650.3	blue	PTHR27008:SF42 - LEUCINE-RICH REPEAT PROTEIN KINASE-LIKE PROTEIN			0.000157296	0.000214018		1.33243e-05	0.000715782
Solyc01g107750.3	blue	3.1.3.67 - Phosphatidylinositol-3,4,5-trisphosphate 3-phosphatase / Phosphatidylinositol-3,4,5-trisphosphate 3-phosphohydrolase			0.0465471
Solyc01g107800.3	blue	PF04669 - Polysaccharide biosynthesis (Polysacc_synt_4)			0.000169107	2.15822e-08		6.50686e-09	0.00012303
Solyc01g107890.3	blue	PTHR31580:SF3 - FILAMENT-LIKE PLANT PROTEIN 7			5.03816e-15	1.57899e-19		1.01503e-23	1.99546e-17
Solyc01g108210.3	blue	1.14.13.93 - (+)-abscisic acid 8'-hydroxylase / ABA 8'-hydroxylase			0.00445687	0.0349049
Solyc01g108500.3	blue	PTHR24012:SF403 - POLYADENYLATE-BINDING PROTEIN RBP47A			0.00300303	0.00459022		0.0142996	0.00345021
Solyc01g108560.3	blue		0.00325482		0.0115578	1.88683e-08	0.0193021	3.68959e-08	0.0251459
Solyc01g109120.3	blue	KOG0315//KOG0316//KOG0645 - G-protein beta subunit-like protein (contains WD40 repeats) // Conserved WD40 repeat-containing protein // WD40 repeat protein			1.11194e-07	3.81234e-08		4.24119e-05	5.72886e-06
Solyc01g109800.2	blue					0.00770052
Solyc01g110160.3	blue				5.5844e-14	4.75699e-16		1.71832e-13	1.4173e-12
Solyc01g110360.3	blue	K01623 - fructose-bisphosphate aldolase, class I (ALDO)			5.5552e-179	5.23348e-244		0	9.86989e-199
Solyc01g110370.3	blue	PTHR31832//PTHR31832:SF5 - FAMILY NOT NAMED // B-BOX TYPE ZINC FINGER-CONTAINING PROTEIN			3.60565e-13	5.26977e-14		4.43105e-11	5.76484e-12
Solyc01g110510.3	blue	PTHR12276//PTHR12276:SF58 - EPSIN/ENT-RELATED // SUBFAMILY NOT NAMED			1.80879e-05	2.2673e-05		0.0012122	0.000393261
Solyc01g110530.3	blue	K09578 - peptidyl-prolyl cis-trans isomerase NIMA-interacting 1 (PIN1)			0.00648531
Solyc01g110735.1	blue	K14488 - SAUR family protein (SAUR)			0.00452947	0.0109963		0.0396692	0.0203825
Solyc01g110913.1	blue	K14488 - SAUR family protein (SAUR)							0.0458851
Solyc01g111630.3	blue	1.1.1.29//1.1.1.81 - Glycerate dehydrogenase / Hydroxypyruvate reductase // Hydroxypyruvate reductase / D-glycerate dehydrogenase			3.00157e-32	5.19249e-49		7.20863e-49	1.09495e-31
Solyc01g112060.3	blue	PTHR14194//PTHR14194:SF81 - NITROGEN METABOLIC REGULATION PROTEIN NMR-RELATED // SUBFAMILY NOT NAMED			3.8292e-23	1.23303e-50		3.0139e-54	1.24888e-21
Solyc01g112080.3	blue	PTHR33734:SF5 - LYSM DOMAIN-CONTAINING GPI-ANCHORED PROTEIN 2			0.00073037	4.03848e-07		2.27387e-07	0.00284483
Solyc01g112260.3	blue				2.2771e-17	1.51132e-14		3.56085e-12	8.70468e-17
Solyc02g005180.3	blue	PTHR23500:SF62 - SUGAR TRANSPORTER ERD6-LIKE 14-RELATED			1.21723e-14	4.17745e-14		9.28662e-14	7.21046e-16
Solyc02g005210.3	blue	PF12046 - Protein of unknown function (DUF3529) (DUF3529)			2.98969e-13	4.20495e-12		7.31659e-10	2.22339e-11
Solyc02g011815.1	blue	PTHR23321:SF30 - 30S RIBOSOMAL PROTEIN S15, CHLOROPLASTIC							0.0083351
Solyc02g011985.1	blue	PTHR13691//PTHR13691:SF21 - RIBOSOMAL PROTEIN L2 // SUBFAMILY NOT NAMED			0.0106339
Solyc02g014460.3	blue	KOG4328 - WD40 protein			2.77834e-16	5.46647e-18		1.22691e-15	1.07868e-13
Solyc02g014520.3	blue	PTHR13271//PTHR13271:SF37 - UNCHARACTERIZED PUTATIVE METHYLTRANSFERASE // SUBFAMILY NOT NAMED			3.15587e-05	6.70196e-06		3.5126e-05	0.000292638
Solyc02g020910.3	blue	PTHR13140:SF384 - MYOSIN-2			1.89924e-30	3.74998e-29		7.09915e-27	4.38499e-29
Solyc02g020940.3	blue	PTHR10836//PTHR10836:SF49 - GLYCERALDEHYDE 3-PHOSPHATE DEHYDROGENASE // SUBFAMILY NOT NAMED			1.63279e-76	9.41993e-90		7.66353e-119	6.46233e-87
Solyc02g020980.3	blue	PTHR32518:SF3 - 4-ALPHA-GLUCANOTRANSFERASE DPE2			5.54352e-06	1.49789e-05		0.000176184	0.000155711
Solyc02g021590.3	blue	PTHR27001:SF83 - LRR RECEPTOR-LIKE SERINE/THREONINE-PROTEIN KINASE MRH1-RELATED			5.89194e-15	2.07361e-13		2.30416e-08	4.69152e-12
Solyc02g023990.3	blue	1.1.1.320 - Benzil reductase ((S)-benzoin forming)			5.97222e-17	9.31436e-15		3.61348e-10	3.86354e-14
Solyc02g030300.3	blue	PF00954//PF01453//PF07714//PF08276 - S-locus glycoprotein domain (S_locus_glycop) // D-mannose binding lectin (B_lectin) // Protein tyrosine kinase (Pkinase_Tyr) // PAN-like domain (PAN_2)	0.0285426		0.0246385	6.20245e-05		0.00374516
Solyc02g036270.3	blue	PTHR23155//PTHR23155:SF500 - LEUCINE-RICH REPEAT-CONTAINING PROTEIN // SUBFAMILY NOT NAMED			0.0367862
Solyc02g036370.3	blue	PTHR12802//PTHR12802:SF60 - SWI/SNF COMPLEX-RELATED // PROTEIN REVEILLE 1-RELATED			8.8421e-21	9.54369e-36		8.06373e-24	4.48711e-17
Solyc02g038710.1	blue	K02710 - photosystem II PsbI protein (psbI)			0.00134581	0.0119629			0.00504322
Solyc02g043940.1	blue				0.000269751	0.00036805		0.0101716	0.00564918
Solyc02g062340.3	blue	PTHR11627:SF15 - FRUCTOSE-BISPHOSPHATE ALDOLASE 2, CHLOROPLASTIC-RELATED			4.92618e-168	6.66835e-188		2.28154e-259	6.04586e-197
Solyc02g062580.3	blue	PTHR11247//PTHR11247:SF25 - PALMITOYL-PROTEIN THIOESTERASE/DOLICHYLDIPHOSPHATASE 1 // LIPID PHOSPHATE PHOSPHATASE EPSILON 1, CHLOROPLASTIC-RELATED			2.83151e-14	4.81832e-11		2.35632e-08	5.47918e-13
Solyc02g062610.3	blue	PTHR10992//PTHR10992:SF701 - ALPHA/BETA HYDROLASE FOLD-CONTAINING PROTEIN // SERINE HYDROLASE-RELATED			4.66281e-44	2.7486e-51		3.95789e-43	2.31108e-41
Solyc02g062690.3	blue	PTHR12565//PTHR12565:SF132 - STEROL REGULATORY ELEMENT-BINDING PROTEIN // TRANSCRIPTION FACTOR BEE 2-RELATED			0.00024585	0.00355446		0.000413235	5.63774e-05
Solyc02g062720.3	blue	K01247 - DNA-3-methyladenine glycosylase II (alkA)			0.000192077	0.00137278		0.0293417	0.00392325
Solyc02g062750.3	blue	PF00320//PF07690 - GATA zinc finger (GATA) // Major Facilitator Superfamily (MFS_1)			0.00513961	0.0285437			0.0494415
Solyc02g062950.3	blue	PTHR22952//PTHR22952:SF123 - CAMP-RESPONSE ELEMENT BINDING PROTEIN-RELATED // G-BOX-BINDING FACTOR 1			1.07945e-08	4.89661e-07		7.81112e-05	2.30183e-07
Solyc02g063360.3	blue	PTHR23180//PTHR23180:SF285 - CENTAURIN/ARF // SUBFAMILY NOT NAMED			8.19102e-05	0.000425415		0.0143035	0.00215646
Solyc02g063390.3	blue	KOG4650 - Predicted steroid reductase			0.03604	0.00297317		0.0224166
Solyc02g064550.3	blue	KOG4498 - Uncharacterized conserved protein			1.0887e-05	1.50813e-08		1.14179e-08	5.48894e-05
Solyc02g064700.3	blue	PTHR24054//PTHR24054:SF33 - CASEIN KINASE II SUBUNIT ALPHA // CASEIN KINASE II SUBUNIT ALPHA, CHLOROPLASTIC			0.000783892	3.34182e-06		0.000433819	0.0080944
Solyc02g064720.3	blue	PF00651//PF03000 - BTB/POZ domain (BTB) // NPH3 family (NPH3)			2.73821e-08	8.15065e-07		2.62633e-05	9.47136e-07
Solyc02g065110.3	blue	PTHR24361:SF300 - MITOGEN-ACTIVATED PROTEIN KINASE KINASE KINASE 5			0.000299296	0.00382636		0.000639043	0.000525125
Solyc02g065220.3	blue	1.14.13.152 - Geraniol 8-hydroxylase / G10H			0.00100009	4.01304e-06		1.33243e-05	0.00371704
Solyc02g065280.3	blue	3.1.1.78 - Polyneuridine-aldehyde esterase / Polyneuridine aldehyde esterase			0.000279779	0.00222175		0.00691235	0.000155622
Solyc02g065610.3	blue	PF13839//PF14416 - GDSL/SGNH-like Acyl-Esterase family found in Pmr5 and Cas1p (PC-Esterase) // PMR5 N terminal Domain (PMR5N)			0.00010901	2.53071e-07		1.46835e-06	0.00254164
Solyc02g065780.1	blue				0.00016657	1.91198e-05		2.39871e-06	2.21292e-05
Solyc02g066955.1	blue	PTHR10357//PTHR10357:SF157 - ALPHA-AMYLASE // SUBFAMILY NOT NAMED			0.00982695	0.00405842		0.0373791	0.0262642
Solyc02g067230.3	blue	PTHR31089//PTHR31089:SF1 - FAMILY NOT NAMED // CYCLIC DOF FACTOR 4-RELATED			4.17213e-93	7.25568e-91		1.97342e-84	1.98774e-95
Solyc02g068340.3	blue	PF00225//PF00373//PF00784//PF09379 - Kinesin motor domain (Kinesin) // FERM central domain (FERM_M) // MyTH4 domain (MyTH4) // FERM N-terminal domain (FERM_N)			0.000262237	9.90343e-06		0.00343564	0.00594392
Solyc02g068380.3	blue	3.5.3.9 - Allantoate deiminase			2.38764e-16	1.55293e-14		4.07861e-13	5.84631e-16
Solyc02g068610.2	blue	PTHR24177:SF42 - ANKYRIN REPEAT FAMILY PROTEIN						0.00330546
Solyc02g069160.3	blue	K14407 - cleavage stimulation factor subunit 2 (CSTF2, RNA15)							0.0355123
Solyc02g069190.3	blue	PTHR11040:SF48 - ZINC TRANSPORTER 10-RELATED			0.000105225	5.67624e-12		6.92522e-10	0.000573441
Solyc02g069200.2	blue		0.00626066		0.00204928	4.14804e-09		6.50875e-05	0.0309273
Solyc02g069450.3	blue	K02694 - photosystem I subunit III (psaF)			8.71953e-11	3.37919e-10		6.18682e-14	4.40937e-14
Solyc02g069510.1	blue	PF04852 - Protein of unknown function (DUF640) (DUF640)			2.68313e-05	1.06945e-05		0.000338249	0.000517499
Solyc02g069630.3	blue	PTHR10795:SF439 - SERINE PROTEINASE-RELATED			0.00155598	0.00373897		0.0174681	0.0167434
Solyc02g070020.1	blue	PTHR11926:SF145 - UDP-GLYCOSYLTRANSFERASE 91C1				0.0187799
Solyc02g070210.3	blue	PTHR23324:SF48 - PATELLIN-3-RELATED			1.45069e-05	1.41503e-09		3.9933e-07	0.000286713
Solyc02g070260.3	blue	PTHR24365//PTHR24365:SF274 - TOLL-LIKE RECEPTOR // SUBFAMILY NOT NAMED			0.0155013	0.00576523		0.0241633
Solyc02g070760.3	blue	PTHR15020//PTHR15020:SF11 - FLAVIN REDUCTASE-RELATED // UPF0659 PROTEIN YMR090W			2.51266e-08	3.72173e-10		6.28464e-08	3.5128e-07
Solyc02g070770.3	blue	PTHR15020//PTHR15020:SF11 - FLAVIN REDUCTASE-RELATED // UPF0659 PROTEIN YMR090W			0.000824567	7.27391e-07		3.8708e-08	0.00218226
Solyc02g071320.3	blue				0.0261218	0.0405162
Solyc02g071360.3	blue	1.14.11.31 - Thebaine 6-O-demethylase			0.0367307	0.0068748
Solyc02g071520.3	blue	PTHR10791//PTHR10791:SF23 - RAG1-ACTIVATING PROTEIN 1 // SUBFAMILY NOT NAMED			1.19275e-16	5.53668e-14		2.7624e-10	8.18491e-14
Solyc02g071860.3	blue	PTHR27006//PTHR27006:SF8 - FAMILY NOT NAMED // LEUCINE-RICH REPEAT TRANSMEMBRANE PROTEIN KINASE			1.55513e-15	1.25017e-13		1.36523e-19	7.99971e-16
Solyc02g072160.3	blue	PTHR13194:SF19 - NAD(P)-BINDING ROSSMANN-FOLD SUPERFAMILY PROTEIN			3.44235e-11	1.462e-09		6.54216e-08	9.2637e-11
Solyc02g072220.1	blue	PF07939 - Protein of unknown function (DUF1685) (DUF1685)			0.00019638	0.00525913			0.00460435
Solyc02g072260.3	blue	PTHR34449:SF1 - RHO TERMINATION FACTOR			8.75197e-16	6.3012e-18		3.75729e-16	1.40259e-13
Solyc02g072540.3	blue	PTHR24347//PTHR24347:SF168 - SERINE/THREONINE-PROTEIN KINASE // CBL-INTERACTING SERINE/THREONINE-PROTEIN KINASE 12-RELATED			1.43345e-15	1.18171e-22		5.809e-20	2.25881e-06
Solyc02g072560.1	blue	PTHR22952//PTHR22952:SF141 - CAMP-RESPONSE ELEMENT BINDING PROTEIN-RELATED // SUBFAMILY NOT NAMED			0.00667317	0.029306			0.0347607
Solyc02g076680.3	blue	PTHR33671//PTHR33671:SF3 - FAMILY NOT NAMED // F28N24.8 PROTEIN			8.37313e-14	2.07317e-12		1.42144e-14	2.42409e-17
Solyc02g077120.3	blue	PTHR22835//PTHR22835:SF257 - ZINC FINGER FYVE DOMAIN CONTAINING PROTEIN // SUBFAMILY NOT NAMED			0.000220188	0.00781389			0.00218329
Solyc02g077950.2	blue	PTHR31992:SF8 - DOF ZINC FINGER PROTEIN DOF1.1-RELATED			4.77604e-06	0.000105516		0.00357799	6.97326e-05
Solyc02g078620.1	blue	PTHR31992:SF8 - DOF ZINC FINGER PROTEIN DOF1.1-RELATED			0.0328094				0.0418713
Solyc02g078780.3	blue	PTHR27001//PTHR27001:SF91 - FAMILY NOT NAMED // PROTEIN STRUBBELIG-RELATED			0.0496479	0.0140089		0.0253436	0.0452899
Solyc02g079740.1	blue	PTHR23315//PTHR23315:SF112 - BETA CATENIN-RELATED ARMADILLO REPEAT-CONTAINING // U-BOX DOMAIN-CONTAINING PROTEIN 8			0.000428253	0.00400536		0.0402798	0.0058346
Solyc02g080290.3	blue	PTHR10353//PTHR10353:SF27 - GLYCOSYL HYDROLASE // BETA-GLUCOSIDASE 45-RELATED			0.0260236
Solyc02g080360.1	blue				0.0294198
Solyc02g080470.3	blue	PTHR19375:SF149 - HEAT SHOCK 70 KDA PROTEIN 16			4.36977e-05	0.000618907		0.0063676	0.000765439
Solyc02g080500.3	blue				0.00743537	0.0124317			0.0420084
Solyc02g080510.1	blue	PF04520 - Senescence regulator (Senescence_reg)			5.40589e-21	1.1607e-18		4.88016e-15	2.55069e-18
Solyc02g080570.3	blue	PTHR12526//PTHR12526:SF341 - GLYCOSYLTRANSFERASE // SUBFAMILY NOT NAMED			7.52758e-07	5.93977e-06		2.31642e-05	1.45562e-06
Solyc02g080660.3	blue	PTHR32227//PTHR32227:SF120 - FAMILY NOT NAMED // GLUCAN ENDO-1,3-BETA-GLUCOSIDASE 1			0.000138316	7.63676e-05		0.0101224	0.00345021
Solyc02g080780.3	blue				9.4065e-23	3.962e-21		6.88194e-17	5.15184e-20
Solyc02g080810.3	blue	K00605 - aminomethyltransferase (gcvT, AMT)			8.87621e-49	2.60976e-56		2.48513e-56	7.86357e-48
Solyc02g081130.2	blue	PTHR12505//PTHR12505:SF27 - PHD FINGER TRANSCRIPTION FACTOR // SUBFAMILY NOT NAMED			0.0233511	4.39172e-05		0.00349454
Solyc02g081250.2	blue	PTHR22870:SF177 - F12P19.9 PROTEIN			0.017583	0.0481904
Solyc02g081330.3	blue				1.97007e-24	2.90049e-31		4.01669e-26	4.87358e-22
Solyc02g081690.1	blue	PTHR11926//PTHR11926:SF267 - GLUCOSYL/GLUCURONOSYL TRANSFERASES // SUBFAMILY NOT NAMED			0.0214315
Solyc02g081730.3	blue	K07748 - sterol-4alpha-carboxylate 3-dehydrogenase (decarboxylating) (E1.1.1.170, NSDHL, ERG26)			0.000398053	0.00363475		5.78802e-05	2.46305e-05
Solyc02g082490.3	blue	PTHR13832//PTHR13832:SF304 - PROTEIN PHOSPHATASE 2C // PROTEIN PHOSPHATASE 2C 47-RELATED			0.00782837			0.00475103	0.0373301
Solyc02g082760.3	blue	1.11.1.21 - Catalase peroxidase			3.41978e-55	1.33539e-77		1.11453e-102	8.12882e-59
Solyc02g082800.3	blue	PTHR10677//PTHR10677:SF22 - UBIQUILIN // SUBFAMILY NOT NAMED			0.00331489	0.0337711			0.0190503
Solyc02g083560.3	blue	K18468 - vacuolar protein sorting-associated protein 35 (VPS35)			0.0322475
Solyc02g083810.3	blue	1.18.1.2//1.6.99.1 - Ferredoxin--NADP(+) reductase // NADPH dehydrogenase / NADPH diaphorase			4.57889e-20	6.92047e-27		2.37883e-45	9.50133e-25
Solyc02g083820.1	blue	PTHR23315//PTHR23315:SF60 - BETA CATENIN-RELATED ARMADILLO REPEAT-CONTAINING // ARMADILLO REPEAT ONLY 3						0.0419003
Solyc02g084400.3	blue	PTHR10566//PTHR10566:SF93 - CHAPERONE-ACTIVITY OF BC1 COMPLEX CABC1 -RELATED // SUBFAMILY NOT NAMED			2.73286e-10	2.35214e-08		0.000293303	2.40424e-07
Solyc02g084430.3	blue				4.09198e-46	8.90386e-40		5.19645e-29	2.75821e-42
Solyc02g084440.3	blue	PTHR11627:SF15 - FRUCTOSE-BISPHOSPHATE ALDOLASE 2, CHLOROPLASTIC-RELATED			2.72448e-127	2.17176e-198		3.04962e-235	1.20294e-133
Solyc02g084650.3	blue	PTHR21193:SF3 - OXIDOREDUCTASE-LIKE DOMAIN-CONTAINING PROTEIN 1			2.38461e-11	7.39303e-10		4.43496e-07	2.33582e-09
Solyc02g084990.3	blue	PTHR31451:SF8 - MANNAN ENDO-1,4-BETA-MANNOSIDASE 3-RELATED			5.76535e-45	1.23303e-50		1.36681e-95	2.02928e-73
Solyc02g085360.3	blue	K09587 - steroid 22-alpha-hydroxylase (CYP90B1, DWF4)						0.00439462	0.0185819
Solyc02g085490.2	blue	PF04788 - Protein of unknown function (DUF620) (DUF620)			0.000138491	0.00363475		0.00658913	0.00409967
Solyc02g085600.1	blue	PTHR31636:SF53 - SCARECROW-LIKE PROTEIN 15			0.000724629	0.0119209			0.00391833
Solyc02g086145.1	blue	PTHR23500//PTHR23500:SF118 - FAMILY NOT NAMED // PLASTIDIC GLUCOSE TRANSPORTER 4			1.09981e-07	1.50251e-06		1.21314e-05	6.77796e-07
Solyc02g086440.3	blue	PTHR24006//PTHR24006:SF492 - FAMILY NOT NAMED // F-BOX/LRR-REPEAT PROTEIN 5			8.0101e-05	0.00249163			0.000670858
Solyc02g086680.3	blue	PTHR10458//PTHR10458:SF2 - PEPTIDE DEFORMYLASE // PEPTIDE DEFORMYLASE 1B, CHLOROPLASTIC/MITOCHONDRIAL			1.24519e-06	3.75618e-05		9.97831e-05	3.31486e-06
Solyc02g086710.3	blue	PTHR22912//PTHR22912:SF170 - DISULFIDE OXIDOREDUCTASE // MONODEHYDROASCORBATE REDUCTASE, CYTOPLASMIC ISOFORM 2-RELATED			4.6987e-17	3.79908e-17		1.22315e-16	1.35064e-16
Solyc02g086820.3	blue	PTHR11002:SF7 - CARBONIC ANHYDRASE 2, CHLOROPLASTIC-RELATED			6.46176e-161	3.58084e-293		0	1.07703e-161
Solyc02g086830.3	blue	PTHR22939:SF81 - PROTEASE DO-LIKE 1, CHLOROPLASTIC			0.000205232	4.63792e-06		2.14508e-05	0.00134991
Solyc02g087000.3	blue	PTHR30540:SF18 - POTASSIUM TRANSPORTER 8			0.000553336	0.00453134		0.00409012	0.000317355
Solyc02g087230.3	blue	K17892 - ferredoxin-thioredoxin reductase catalytic chain (FTRC)				0.0316987
Solyc02g087340.3	blue	PF05542 - Protein of unknown function (DUF760) (DUF760)			3.66977e-14	3.3427e-20		4.74752e-16	3.04191e-12
Solyc02g087780.3	blue	K01785 - aldose 1-epimerase (galM, GALM)			0.00548159	0.00957171		0.018003	0.0226857
Solyc02g088517.1	blue	PTHR11926//PTHR11926:SF352 - GLUCOSYL/GLUCURONOSYL TRANSFERASES // SUBFAMILY NOT NAMED			0.0186574
Solyc02g088820.3	blue	PTHR11802//PTHR11802:SF43 - SERINE PROTEASE FAMILY S10 SERINE CARBOXYPEPTIDASE // SERINE CARBOXYPEPTIDASE-LIKE 25			0.0289203				0.0482826
Solyc02g088830.3	blue	PTHR36747//PTHR36747:SF1 - FAMILY NOT NAMED // HYDROXYPROLINE-RICH GLYCOPROTEIN-LIKE PROTEIN			0.000247813	0.000347976		0.026884	0.00508428
Solyc02g089020.2	blue	PTHR31072:SF5 - TRANSCRIPTION FACTOR TCP13			0.00671309	0.0264864			0.036603
Solyc02g089065.1	blue	K18635 - protein SPIRAL1 and related proteins (SPR1)			2.09719e-09	6.08749e-12		1.21776e-09	1.15199e-07
Solyc02g089130.3	blue	PTHR31673//PTHR31673:SF2 - FAMILY NOT NAMED // COBRA-LIKE PROTEIN 4			7.62637e-11	5.14545e-08		3.58369e-05	2.51057e-08
Solyc02g089515.1	blue				2.13875e-05	0.000610954			0.000743578
Solyc02g089520.2	blue	KOG1601 - GATA-4/5/6 transcription factors			0.0259951
Solyc02g089540.3	blue	KOG1601 - GATA-4/5/6 transcription factors			7.10822e-84	1.29299e-90		1.43185e-97	2.5711e-90
Solyc02g089610.2	blue	4.1.1.50 - Adenosylmethionine decarboxylase / S-adenosyl-L-methionine decarboxylase			3.63567e-96	1.2995e-95		3.27591e-274	1.85346e-164
Solyc02g089680.3	blue	PF13839//PF14416 - GDSL/SGNH-like Acyl-Esterase family found in Pmr5 and Cas1p (PC-Esterase) // PMR5 N terminal Domain (PMR5N)			0.0055537	0.0232214			0.0290491
Solyc02g089700.3	blue	PF13839//PF14416 - GDSL/SGNH-like Acyl-Esterase family found in Pmr5 and Cas1p (PC-Esterase) // PMR5 N terminal Domain (PMR5N)			0.0198774	0.0013083		0.00107865	0.00428617
Solyc02g089750.3	blue				7.38287e-06	0.00014086		0.0101027	0.000324872
Solyc02g089930.3	blue	KOG1703 - Adaptor protein Enigma and related PDZ-LIM proteins			1.7539e-10	8.03959e-09		9.0133e-06	2.63348e-08
Solyc02g089940.3	blue	PTHR11850//PTHR11850:SF103 - HOMEOBOX PROTEIN TRANSCRIPTION FACTORS // SUBFAMILY NOT NAMED			0.0148794	0.0156806		0.0220708	0.010559
Solyc02g090010.2	blue	PTHR33359//PTHR33359:SF1 - FAMILY NOT NAMED // MOLYBDOPTERIN SYNTHASE SULFUR CARRIER SUBUNIT			0.00854695
Solyc02g090100.1	blue				1.44722e-14	1.41889e-13		1.70965e-15	1.91248e-14
Solyc02g090267.1	blue	1.14.13.152 - Geraniol 8-hydroxylase / G10H			0.000191837	0.000563886		0.0021694	0.0022293
Solyc02g090380.3	blue	PTHR23155//PTHR23155:SF543 - LEUCINE-RICH REPEAT-CONTAINING PROTEIN // SUBFAMILY NOT NAMED						0.034506	0.00839682
Solyc02g090890.3	blue	K09838 - zeaxanthin epoxidase (ZEP, ABA1)			1.57034e-17	3.49827e-33		4.49179e-35	4.78232e-17
Solyc02g091470.3	blue	PTHR27001//PTHR27001:SF52 - FAMILY NOT NAMED // PROTEIN KINASE FAMILY PROTEIN-RELATED			0.00183173	0.000922781		0.0167211	0.0275767
Solyc02g091560.3	blue	PTHR11680:SF10 - SERINE HYDROXYMETHYLTRANSFERASE 1, MITOCHONDRIAL			1.48295e-37	1.03677e-57		1.64174e-90	1.76162e-38
Solyc02g091890.2	blue				0.0403015
Solyc02g091960.3	blue	PTHR31908//PTHR31908:SF2 - FAMILY NOT NAMED // NUCLEAR MATRIX CONSTITUENT PROTEIN 1-LIKE PROTEIN-RELATED			0.0137744
Solyc02g092700.3	blue	PTHR34214:SF3 - GB|AAC18972.1			1.01281e-58	1.21465e-90		1.8595e-99	1.69068e-60
Solyc02g092810.3	blue	PTHR12183//PTHR12183:SF14 - UNCHARACTERIZED RING ZINC FINGER-CONTAINING PROTEIN // RING-FINGER DOMAIN-CONTAINING PROTEIN			0.0120062
Solyc02g093120.3	blue	KOG1457 - RNA binding protein (contains RRM repeats)			0.0296339
Solyc02g093350.3	blue				0.00370076	0.0203266			0.0211129
Solyc02g093720.3	blue	PTHR31358:SF12 - TPX2 (TARGETING PROTEIN FOR XKLP2) PROTEIN FAMILY			2.44383e-18	7.87728e-17		8.3226e-30	1.1125e-27
Solyc02g094010.2	blue	PTHR27001:SF120 - PROTEIN LYK2				0.00519967		0.0468845
Solyc02g094120.3	blue	1.8.3.1 - Sulfite oxidase			7.25549e-18	2.15099e-16		3.26626e-19	1.24181e-18
Solyc02g094420.3	blue	PTHR21087//PTHR21087:SF4 - SHIKIMATE KINASE // INACTIVE SHIKIMATE KINASE LIKE 1, CHLOROPLASTIC-RELATED			1.68366e-12	8.81045e-38		3.4133e-35	5.88531e-11
Solyc02g094560.3	blue	PF12576 - Protein of unknown function (DUF3754) (DUF3754)			0.0354672
Solyc03g005200.3	blue	PF14368 - Probable lipid transfer (LTP_2)			0.011334	0.014969
Solyc03g005230.3	blue	PTHR10108//PTHR10108:SF904 - METHYLTRANSFERASE // 2-METHYL-6-PHYTYL-1,4-HYDROQUINONE METHYLTRANSFERASE, CHLOROPLASTIC			5.41023e-22	6.1609e-36		2.10969e-56	1.53259e-20
Solyc03g005340.3	blue	K01303 - acylaminoacyl-peptidase [EC:3.4.19.1] (APEH)			0.00053759	0.00354087		0.0193408	0.0109586
Solyc03g005420.2	blue	PTHR13806:SF20 - FLOTILLIN-2			0.00430282	0.00623646			0.0494346
Solyc03g005470.3	blue	PF05514 - HR-like lesion-inducing (HR_lesion)			0.00160213	0.00936852			0.0131106
Solyc03g006030.3	blue	PF00069//PF00560//PF08263//PF13855 - Protein kinase domain (Pkinase) // Leucine Rich Repeat (LRR_1) // Leucine rich repeat N-terminal domain (LRRNT_2) // Leucine rich repeat (LRR_8)			5.32512e-05	1.67801e-29		1.00991e-23	0.00123282
Solyc03g006530.3	blue				0.0331386
Solyc03g006610.3	blue	PTHR23180//PTHR23180:SF262 - CENTAURIN/ARF // ADP-RIBOSYLATION FACTOR GTPASE-ACTIVATING PROTEIN AGD15-RELATED			0.000418656	0.00191458		0.00154377	8.08596e-05
Solyc03g006640.3	blue				3.3893e-20	3.50954e-20		9.28984e-16	1.10095e-16
Solyc03g006870.3	blue	5.4.2.5 - Phosphoglucomutase (glucose-cofactor) / Glucose-1-phosphate phosphotransferase			0.00100377	0.00260025		0.00389289	0.0141959
Solyc03g007000.3	blue	PTHR22726 - OMA1 HOMOLOG, ZINC METALLOPEPTIDASE			0.0218734
Solyc03g007030.3	blue	KOG3461 - CDGSH-type Zn-finger containing protein			2.87415e-39	1.9752e-38		3.10932e-50	4.85614e-41
Solyc03g007180.1	blue					0.0401357
Solyc03g007240.3	blue	K00797 - spermidine synthase (speE, SRM)			0.0183221	0.00687519		0.0137145
Solyc03g007520.3	blue				0.000473114	0.00108674		0.0106757	0.00215831
Solyc03g007580.2	blue	PTHR12064//PTHR12064:SF36 - ANCIENT CONSERVED DOMAIN PROTEIN-RELATED // SUBFAMILY NOT NAMED			0.0314364	5.61991e-08		2.44571e-05
Solyc03g007775.1	blue	PTHR34576:SF3 - MEMBRANE-ASSOCIATED KINASE REGULATOR 6-RELATED			2.29768e-28	1.13923e-33		1.90479e-32	1.00574e-29
Solyc03g013440.3	blue	PTHR22950:SF280 - TRANSMEMBRANE AMINO ACID TRANSPORTER FAMILY PROTEIN			0.00276792	0.0294248			0.0400561
Solyc03g013460.1	blue	PTHR11403:SF7 - CYTOCHROME C OXIDASE SUBUNIT 3			0.00177729	0.0232933			0.0129565
Solyc03g019660.3	blue				1.26109e-08	1.08051e-09		1.20567e-06	8.83313e-07
Solyc03g019670.3	blue	PTHR31956//PTHR31956:SF2 - FAMILY NOT NAMED // NON-SPECIFIC PHOSPHOLIPASE C6			0.00713547	0.000464917		0.0206899
Solyc03g019680.3	blue	PTHR13780//PTHR13780:SF45 - AMP-ACTIVATED PROTEIN KINASE, GAMMA REGULATORY SUBUNIT // CBS DOMAIN-CONTAINING PROTEIN CBSCBSPB4-RELATED			8.88191e-08	3.40747e-07		1.03619e-05	3.72958e-07
Solyc03g019700.1	blue	PF11820 - Protein of unknown function (DUF3339) (DUF3339)			0.0420744	0.00182386		0.0272357
Solyc03g019790.3	blue	PTHR11452//PTHR11452:SF32 - ALPHA-GALACTOSIDASE/ALPHA-N-ACETYLGALACTOSAMINIDASE // SUBFAMILY NOT NAMED			0.0193019	0.00154533		0.000466625
Solyc03g025170.1	blue	PTHR31636:SF4 - SCARECROW-LIKE PROTEIN 8			0.0214713	0.028735
Solyc03g025410.3	blue	1.1.1.330 - Very-long-chain 3-oxoacyl-CoA reductase / Very-long-chain beta-ketoacyl-CoA reductase			8.55544e-21	1.01421e-21		6.67677e-16	4.09754e-17
Solyc03g025710.3	blue	PTHR23091:SF253 - GCN5-RELATED N-ACETYLTRANSFERASE			4.82251e-69	5.50551e-59		1.87347e-62	4.02675e-100
Solyc03g025790.3	blue	PTHR22814//PTHR22814:SF140 - COPPER TRANSPORT PROTEIN ATOX1-RELATED // HEAVY METAL TRANSPORT/DETOXIFICATION SUPERFAMILY PROTEIN						0.0141806
Solyc03g025840.3	blue	PTHR10106//PTHR10106:SF17 - CYTOCHROME B561-RELATED // SUBFAMILY NOT NAMED			0.0350734				0.0379159
Solyc03g026260.3	blue	PTHR21530//PTHR21530:SF1 - PHEROMONE SHUTDOWN PROTEIN // TRAB FAMILY PROTEIN			4.60877e-05	5.06572e-05		0.00114701	0.0010074
Solyc03g026300.3	blue	PTHR13148//PTHR13148:SF2 - PER1-RELATED // PER1-LIKE FAMILY PROTEIN			0.000582751	0.00364369			0.00269719
Solyc03g026340.3	blue				0.0149698
Solyc03g031650.3	blue	PTHR10969:SF43 - AUTOPHAGY-RELATED PROTEIN 8A-RELATED			0.0115252	0.034071
Solyc03g031860.3	blue	2.5.1.32 - 15-cis-phytoene synthase / PSase			1.39005e-71	5.63058e-89		1.44747e-142	3.13383e-92
Solyc03g034080.3	blue	K18647 - acidic leucine-rich nuclear phosphoprotein 32 family member B (ANP32B)			3.11254e-40	7.85193e-39		3.70418e-41	5.16188e-36
Solyc03g034450.3	blue	PTHR10315//PTHR10315:SF31 - SEVEN IN ABSENTIA HOMOLOG // SUBFAMILY NOT NAMED			0.00194675	0.0215493		4.66153e-05	7.56513e-06
Solyc03g044190.3	blue	PTHR13847//PTHR13847:SF150 - FAD NAD BINDING OXIDOREDUCTASES // OXIDOREDUCTASE TDA3-RELATED			0.000584281	0.00894605			0.0113842
Solyc03g044480.3	blue	PTHR10265:SF24 - CYCLIN-DEPENDENT KINASE INHIBITOR 1-RELATED			0.00041276	0.00984725			0.00566351
Solyc03g044820.3	blue	PTHR10992//PTHR10992:SF56 - ALPHA/BETA HYDROLASE FOLD-CONTAINING PROTEIN // METHYLESTERASE 4-RELATED			0.0137119			0.00115834	0.0022293
Solyc03g045050.3	blue	PTHR31908//PTHR31908:SF3 - FAMILY NOT NAMED // PROTEIN LITTLE NUCLEI1			0.00411177	0.0258547			0.0402223
Solyc03g045070.1	blue	PTHR11730//PTHR11730:SF36 - AMMONIUM TRANSPORTER // SUBFAMILY NOT NAMED			2.00149e-05	1.27801e-06		8.63685e-05	0.000162239
Solyc03g045100.1	blue				0.0193386	0.011854
Solyc03g046380.1	blue				0.0245251
Solyc03g046450.3	blue	PF14225 - Cell morphogenesis C-terminal (MOR2-PAG1_C)			0.029738
Solyc03g058910.3	blue	PTHR31683//PTHR31683:SF7 - FAMILY NOT NAMED // PECTATE LYASE 19-RELATED			0.000134692	0.00010752		0.00200094	0.00223968
Solyc03g059180.3	blue	PTHR34209//PTHR34209:SF1 - FAMILY NOT NAMED // RHODANESE/CELL CYCLE CONTROL PHOSPHATASE SUPERFAMILY PROTEIN			3.4407e-20	4.80185e-21		1.04322e-17	9.66851e-18
Solyc03g063240.3	blue	PTHR13343//PTHR13343:SF4 - CREG1 PROTEIN // SUBFAMILY NOT NAMED			5.30352e-06	1.35778e-06		2.23816e-05	5.3365e-05
Solyc03g063560.3	blue	1.4.7.1 - Glutamate synthase (ferredoxin) / Ferredoxin-dependent glutamate synthase			3.97073e-31	2.72663e-44		1.1573e-60	3.64622e-28
Solyc03g064010.3	blue	PTHR27008:SF41 - LEUCINE-RICH REPEAT PROTEIN KINASE-LIKE PROTEIN			0.000211005	0.000244341		0.00968945	0.00364726
Solyc03g071690.3	blue	PTHR22924//PTHR22924:SF39 - LEGHEMOGLOBIN-RELATED // NON-SYMBIOTIC HEMOGLOBIN 2			2.17226e-05	7.38542e-08		2.54196e-07	9.79756e-05
Solyc03g078000.3	blue	PTHR23500//PTHR23500:SF159 - FAMILY NOT NAMED // D-XYLOSE-PROTON SYMPORTER-LIKE 3, CHLOROPLASTIC			6.41425e-06	0.000269261		0.00879836	0.000126825
Solyc03g078090.3	blue	PTHR31707//PTHR31707:SF2 - FAMILY NOT NAMED // PECTINESTERASE/PECTINESTERASE INHIBITOR 64-RELATED			0.017968
Solyc03g078400.3	blue	PTHR11937//PTHR11937:SF200 - ACTIN // ACTIN-7			1.50677e-06	8.84795e-13		1.51405e-10	4.51279e-05
Solyc03g078780.2	blue	2.4.1.118 - Cytokinin 7-beta-glucosyltransferase / Uridine diphosphoglucose-zeatin 7-glucosyltransferase			1.24014e-06	5.41979e-07		3.68375e-06	6.72537e-06
Solyc03g081230.1	blue	PF03168 - Late embryogenesis abundant protein (LEA_2)			0.00277614	0.0144749			0.0096341
Solyc03g082610.1	blue	PF04520 - Senescence regulator (Senescence_reg)			8.403e-15	2.20263e-12		4.22982e-10	5.3363e-13
Solyc03g082620.3	blue	PTHR31645//PTHR31645:SF4 - FAMILY NOT NAMED // METAL-NICOTIANAMINE TRANSPORTER YSL2			2.30909e-05	1.69989e-10		6.35774e-09	0.000270203
Solyc03g082970.3	blue	PTHR13832:SF218 - PROTEIN PHOSPHATASE 2C 57			1.16066e-08	3.83057e-10		9.36905e-10	2.4703e-08
Solyc03g083130.2	blue	PTHR33566//PTHR33566:SF1 - FAMILY NOT NAMED // GAMMA-IRRADIATION AND MITOMYCIN C INDUCED 1			0.0471417
Solyc03g083360.3	blue	PTHR31707:SF8 - PECTINESTERASE/PECTINESTERASE INHIBITOR 34-RELATED			1.98106e-07	1.00743e-05		2.03697e-08	1.14761e-11
Solyc03g083520.3	blue	PTHR23050//PTHR23050:SF214 - CALCIUM BINDING PROTEIN // CALCIUM-BINDING PROTEIN CML14-RELATED			0.0141301				0.0392308
Solyc03g083570.3	blue				1.83036e-12	1.83061e-11		2.6189e-09	1.97636e-10
Solyc03g083910.3	blue				6.90466e-07	2.23279e-05		0.00014062	3.18513e-06
Solyc03g093140.3	blue	K13783 - MFS transporter, OPA family, solute carrier family 37 (glycerol-3-phosphate transporter), member 1/2 (SLC37A1_2)			2.26142e-08	1.17129e-14		1.58769e-20	9.02968e-07
Solyc03g093180.1	blue	PTHR12652:SF17 - PEROXISOMAL MEMBRANE PROTEIN 11B			1.40887e-32	2.14364e-29		1.91313e-28	2.15797e-29
Solyc03g093310.3	blue	K10268 - F-box and leucine-rich repeat protein 2/20 (FBXL2_20)			0.0100067				0.0461177
Solyc03g093690.3	blue	PTHR10173:SF23 - PEPTIDE METHIONINE SULFOXIDE REDUCTASE A1-RELATED			7.81415e-28	1.02438e-31		2.22402e-38	5.55683e-31
Solyc03g095490.3	blue	PF00069//PF08263 - Protein kinase domain (Pkinase) // Leucine rich repeat N-terminal domain (LRRNT_2)			0.0115313
Solyc03g095620.3	blue	PTHR10566//PTHR10566:SF41 - CHAPERONE-ACTIVITY OF BC1 COMPLEX CABC1 -RELATED // SUBFAMILY NOT NAMED			0.000148038	0.000703035		0.0345655	0.00422285
Solyc03g095860.3	blue	PTHR24198:SF33 - ANKYRIN REPEAT-CONTAINING PROTEIN			0.00345819	0.0372194			0.0305624
Solyc03g096050.3	blue	PTHR10209:SF134 - 2-OXOGLUTARATE (2OG) AND FE(II)-DEPENDENT OXYGENASE-LIKE PROTEIN			0.000585067	0.00472477		0.042522	0.0017463
Solyc03g096290.3	blue	PTHR19139//PTHR19139:SF146 - AQUAPORIN TRANSPORTER // SUBFAMILY NOT NAMED			2.33205e-71	1.82914e-83		9.21004e-110	3.01085e-85
Solyc03g096850.3	blue	PTHR17130 - MITOCHONDRIAL OUTER MEMBRANE PROTEIN 25			4.64939e-42	2.22671e-41		2.09501e-68	6.55866e-50
Solyc03g097170.3	blue	PTHR10366//PTHR10366:SF428 - NAD DEPENDENT EPIMERASE/DEHYDRATASE // SUBFAMILY NOT NAMED			1.64286e-08	4.16644e-08		3.23986e-07	7.26341e-08
Solyc03g097230.1	blue	2.3.2.4 - Gamma-glutamylcyclotransferase			2.59081e-08	1.03183e-07		5.07331e-05	7.42897e-07
Solyc03g097370.3	blue	PTHR10887:SF320 - P-LOOP CONTAINING NUCLEOSIDE TRIPHOSPHATE HYDROLASES SUPERFAMILY PROTEIN			1.04554e-21	1.22326e-43		3.26144e-87	4.08842e-26
Solyc03g097580.3	blue	PTHR10791//PTHR10791:SF33 - RAG1-ACTIVATING PROTEIN 1 // SUBFAMILY NOT NAMED			8.4949e-11	1.21447e-09		1.00153e-07	5.40458e-09
Solyc03g097870.3	blue	PTHR10791//PTHR10791:SF33 - RAG1-ACTIVATING PROTEIN 1 // SUBFAMILY NOT NAMED			0.0369528	0.00118604		0.000442506
Solyc03g097955.1	blue				3.28786e-44	1.67137e-42		2.01329e-41	1.47565e-41
Solyc03g097990.3	blue	K15544 - RNA polymerase II subunit A C-terminal domain phosphatase SSU72 (SSU72)			0.0362321
Solyc03g098300.1	blue	4.1.1.17 - Ornithine decarboxylase / L-ornithine carboxy-lyase				0.0151906
Solyc03g098320.3	blue	PTHR12802//PTHR12802:SF60 - SWI/SNF COMPLEX-RELATED // PROTEIN REVEILLE 1-RELATED			7.98975e-48	3.58614e-74		3.44005e-53	3.13465e-38
Solyc03g098460.3	blue	PTHR24320:SF73 - OXIDOREDUCTASE FEY3-RELATED			0.00684684	0.0111402			0.0287852
Solyc03g098660.3	blue	PF02893 - GRAM domain (GRAM)			0.0246754	0.0202264
Solyc03g110940.3	blue	PTHR10566//PTHR10566:SF72 - CHAPERONE-ACTIVITY OF BC1 COMPLEX CABC1 -RELATED // PROTEIN KINASE FAMILY PROTEIN			2.34054e-24	1.68577e-26		2.82917e-28	9.04256e-25
Solyc03g111550.3	blue	PTHR22835//PTHR22835:SF231 - ZINC FINGER FYVE DOMAIN CONTAINING PROTEIN // SUBFAMILY NOT NAMED			0.00269686	0.00211032		0.0125506	0.0198031
Solyc03g111665.1	blue				4.23351e-09	1.00617e-08		4.81066e-08	1.48743e-07
Solyc03g111690.3	blue	PTHR31683:SF15 - PECTATE LYASE 18-RELATED			1.03073e-20	9.09344e-23		2.18575e-39	1.60096e-30
Solyc03g111700.3	blue	PF13483 - Beta-lactamase superfamily domain (Lactamase_B_3)			2.90612e-11	3.49172e-11		7.98273e-16	1.10201e-14
Solyc03g111770.3	blue	PTHR12277//PTHR12277:SF42 - UNCHARACTERIZED // ALPHA/BETA-HYDROLASES SUPERFAMILY PROTEIN-RELATED			1.33666e-06	1.04568e-05		0.00227717	6.51154e-05
Solyc03g111797.1	blue	PF14576//PF14577 - Sieve element occlusion N-terminus (SEO_N) // Sieve element occlusion C-terminus (SEO_C)			1.33401e-05	7.93017e-11		8.02555e-09	0.000456499
Solyc03g111950.3	blue	PF00067 - Cytochrome P450 (p450)			0.0259557
Solyc03g111995.1	blue	1.14.13.102 - Psoralen synthase			3.66229e-05	0.000441263		0.0280467	0.000688176
Solyc03g112010.3	blue	PF00067 - Cytochrome P450 (p450)			3.50573e-18	5.55238e-20		7.6166e-17	4.11662e-15
Solyc03g112460.3	blue	K16903 - L-tryptophan---pyruvate aminotransferase (TAA1)			4.15366e-06	2.53658e-08		3.98668e-05	9.09012e-05
Solyc03g112760.3	blue				6.28086e-12	2.24189e-10		1.88622e-10	3.58607e-11
Solyc03g113210.3	blue	K15040 - voltage-dependent anion channel protein 2 (VDAC2)	1.46395e-10			7.9625e-10	6.03821e-08	3.45667e-06
Solyc03g113250.3	blue	PTHR11654//PTHR11654:SF184 - OLIGOPEPTIDE TRANSPORTER-RELATED // PROTEIN NRT1/ PTR FAMILY 4.7			3.74699e-06	0.000176768		0.00103088	1.69708e-05
Solyc03g113340.3	blue	PTHR21576//PTHR21576:SF33 - UNCHARACTERIZED NODULIN-LIKE PROTEIN // F14D16.8-RELATED			0.00468939	0.0323361			0.0108586
Solyc03g114020.3	blue	PF14009 - Domain of unknown function (DUF4228) (DUF4228)	0.000243253		0.0105886	1.34e-10	0.00230828	1.07281e-08
Solyc03g114080.2	blue	PF07714//PF08263//PF13855 - Protein tyrosine kinase (Pkinase_Tyr) // Leucine rich repeat N-terminal domain (LRRNT_2) // Leucine rich repeat (LRR_8)			0.00170616	0.00543803			0.0183595
Solyc03g114100.1	blue								0.0259267
Solyc03g114340.3	blue	1.1.1.267 - 1-deoxy-D-xylulose-5-phosphate reductoisomerase / DXP-reductoisomerase			2.45924e-29	1.73913e-25		1.4701e-25	3.27774e-31
Solyc03g114350.1	blue	PF07816 - Protein of unknown function (DUF1645) (DUF1645)			9.88568e-06	0.000123941		0.000435015	9.28769e-06
Solyc03g114450.3	blue				2.66966e-47	2.70515e-133		6.82126e-148	1.13462e-43
Solyc03g114730.3	blue	PF10250 - GDP-fucose protein O-fucosyltransferase (O-FucT)				0.0187304
Solyc03g114960.3	blue	3.6.3.43 - Peptide-transporting ATPase	0.00386841			0.000349999	0.000765359	0.000242052
Solyc03g115005.1	blue	PF05757 - Oxygen evolving enhancer protein 3 (PsbQ) (PsbQ)			0.00727759	0.00760365		0.0356778	0.0323947
Solyc03g115020.3	blue	PF06549 - Protein of unknown function (DUF1118) (DUF1118)			2.45452e-20	2.45996e-20		3.92248e-17	2.78253e-18
Solyc03g115220.3	blue	K05280 - flavonoid 3'-monooxygenase (E1.14.13.21)			4.55531e-06	2.25495e-05		0.000339243	1.1407e-05
Solyc03g115780.2	blue	PTHR30231 - DNA POLYMERASE III SUBUNIT EPSILON			0.0332606
Solyc03g115870.3	blue	PTHR10438:SF263 - THIOREDOXIN-LIKE 1-2, CHLOROPLASTIC			7.56746e-09	1.30372e-06		1.18407e-10	9.20988e-10
Solyc03g116120.2	blue	PTHR11260:SF221 - GLUTATHIONE S-TRANSFERASE U9				0.0149879
Solyc03g116280.3	blue	PTHR10209//PTHR10209:SF105 - OXIDOREDUCTASE, 2OG-FE II OXYGENASE FAMILY PROTEIN // SUBFAMILY NOT NAMED			0.000138443	0.000357337		0.0106524	0.00204568
Solyc03g116290.2	blue	PTHR10209//PTHR10209:SF105 - OXIDOREDUCTASE, 2OG-FE II OXYGENASE FAMILY PROTEIN // SUBFAMILY NOT NAMED			3.93789e-07	2.57521e-07		5.77287e-07	1.92709e-07
Solyc03g116340.3	blue	PTHR23042//PTHR23042:SF51 - CIRCADIAN PROTEIN CLOCK/ARNT/BMAL/PAS // TRANSCRIPTION FACTOR BHLH47			1.70601e-08	7.58989e-09		4.24068e-07	8.15044e-08
Solyc03g116730.3	blue	K00507 - stearoyl-CoA desaturase (delta-9 desaturase) (SCD, desC)			1.02301e-42	3.39147e-62		5.00262e-136	1.35807e-58
Solyc03g116740.3	blue	PF14378 - PAP2 superfamily (PAP2_3)			3.50188e-30	1.23503e-31		1.85781e-24	5.28958e-28
Solyc03g116870.3	blue	PTHR30160//PTHR30160:SF0 - TETRAACYLDISACCHARIDE 4'-KINASE-RELATED // SUBFAMILY NOT NAMED			1.48761e-16	1.20063e-17		5.49888e-19	4.19733e-15
Solyc03g117280.3	blue	PTHR31414//PTHR31414:SF1 - FAMILY NOT NAMED // TRANSMEMBRANE PROTEIN DDB_G0292058			0.000355397	1.87868e-05		2.79575e-07	5.92633e-05
Solyc03g117670.3	blue	PTHR37205:SF1 - F23A5.30 PROTEIN			3.20791e-06	3.03893e-06		3.47277e-06	0.000246474
Solyc03g117850.3	blue	KOG0651 - 26S proteasome regulatory complex, ATPase RPT4			1.03652e-18	1.1655e-26		3.49086e-27	7.33722e-17
Solyc03g117870.3	blue	6.2.1.12//6.2.1.34 - 4-coumarate--CoA ligase / 4-coumaryl-CoA synthetase // Trans-feruloyl-CoA synthase / Trans-feruloyl-CoA synthetase			8.08854e-14	2.29338e-14		1.19998e-11	4.21736e-12
Solyc03g117890.3	blue	PTHR31096//PTHR31096:SF16 - FAMILY NOT NAMED // ACT DOMAIN-CONTAINING PROTEIN			4.64534e-22	2.40192e-22		7.0842e-25	2.27306e-25
Solyc03g118130.3	blue	PTHR17130//PTHR17130:SF25 - MITOCHONDRIAL OUTER MEMBRANE PROTEIN 25 // SUBFAMILY NOT NAMED			2.19858e-59	2.81259e-85		8.80436e-103	5.90327e-58
Solyc03g118150.3	blue	PTHR10174//PTHR10174:SF145 - RETINALDEHYDE BINDING PROTEIN-RELATED // SUBFAMILY NOT NAMED			0.00195837	0.0306735			0.0151897
Solyc03g118300.1	blue							0.0276839
Solyc03g118430.3	blue	PTHR11851:SF152 - PROTEIN UCR-2.3			6.36076e-05	8.70876e-05		1.47969e-05	0.000200819
Solyc03g118830.3	blue	1.3.99.5 - 3-oxo-5-alpha-steroid 4-dehydrogenase (acceptor) / Steroid 5-alpha-reductase			3.07556e-07	1.01974e-05		0.00130626	6.18524e-06
Solyc03g118840.3	blue	PTHR22937//PTHR22937:SF18 - RING FINGER CONTAINING PROTEIN // F6A14.12 PROTEIN-RELATED			4.45285e-15	4.21971e-12		4.26476e-12	5.6473e-18
Solyc03g119340.3	blue	K04733 - interleukin-1 receptor-associated kinase 4 (IRAK4)			0.000355027	0.00257153		0.0089026	0.000118518
Solyc03g119640.3	blue	PTHR31086:SF20 - ALUMINUM-ACTIVATED MALATE TRANSPORTER 4-RELATED			0.00167317	0.00883696			0.0245811
Solyc03g119650.3	blue	PTHR22844:SF202 - STOMATAL CYTOKINESIS DEFECTIVE				0.0120988
Solyc03g119700.3	blue	K06891 - ATP-dependent Clp protease adaptor protein ClpS (clpS)			9.00103e-23	2.59521e-30		2.56966e-31	7.55395e-24
Solyc03g119720.3	blue	PTHR11005//PTHR11005:SF17 - LYSOSOMAL ACID LIPASE-RELATED // AB-HYDROLASE ASSOCIATED LIPASE REGION CONTAINING PROTEIN			0.0476394
Solyc03g119780.3	blue	K03128 - transcription initiation factor TFIID subunit 2 (TAF2)			0.00526051
Solyc03g119820.1	blue	PTHR33203//PTHR33203:SF4 - FAMILY NOT NAMED // F27J15.22-RELATED			0.0299998				0.0460049
Solyc03g119830.3	blue	PTHR23272//PTHR23272:SF21 - BED FINGER-RELATED // BED ZINC FINGER AND HAT DIMERIZATION DOMAIN-CONTAINING PROTEIN			0.0476157
Solyc03g120020.3	blue	PTHR11453//PTHR11453:SF31 - ANION EXCHANGE PROTEIN // SUBFAMILY NOT NAMED			0.000328296	0.000333444		0.00346064	0.00509703
Solyc03g120380.3	blue	PTHR31734:SF12 - AUXIN-RESPONSIVE PROTEIN IAA19-RELATED			1.4363e-07	1.71193e-07		1.45498e-06	6.78703e-07
Solyc03g120670.3	blue	K18606 - hydroxyphenylpyruvate reductase (HPPR)			2.00436e-11	7.90586e-11		2.29625e-08	1.06951e-09
Solyc03g120750.3	blue	PTHR24073//PTHR24073:SF502 - FAMILY NOT NAMED // RAS-RELATED PROTEIN RABG3D			0.00987024	0.0229178			0.0270306
Solyc03g121510.3	blue	K12638 - 3-epi-6-deoxocathasterone 23-monooxygenase (CYP90D1)			0.0445874
Solyc03g122190.3	blue	PTHR33077:SF13 - PROTEIN TIFY 10A-RELATED	0.0319716		0.00460167	1.20015e-06	0.0267151	2.28133e-06	0.0136438
Solyc03g123910.3	blue	PF13418//PF13964 - Galactose oxidase, central domain (Kelch_4) // Kelch motif (Kelch_6)				0.0317583
Solyc03g124030.3	blue	PTHR26312//PTHR26312:SF0 - FAMILY NOT NAMED // TETRATRICOPEPTIDE REPEAT PROTEIN 5	0.0101371			0.0001895	0.0292087	0.00205418
Solyc04g005090.3	blue	PF11152 - Protein of unknown function (DUF2930) (DUF2930)			6.24617e-25	2.9266e-21		1.49286e-18	2.64576e-25
Solyc04g005420.3	blue	PF07983 - X8 domain (X8)			0.0208328
Solyc04g007290.3	blue	PF04842 - Plant protein of unknown function (DUF639) (DUF639)			0.00113377	0.0174471			0.00182647
Solyc04g007640.3	blue	PTHR23315//PTHR23315:SF52 - BETA CATENIN-RELATED ARMADILLO REPEAT-CONTAINING // U-BOX DOMAIN-CONTAINING PROTEIN 10-RELATED	0.0354813		0.0251735	6.89976e-05		0.0060213
Solyc04g008230.3	blue	PF13229 - Right handed beta helix region (Beta_helix)			4.02583e-07	6.38599e-06		0.000810025	3.51702e-05
Solyc04g008330.1	blue	K13495 - cis-zeatin O-glucosyltransferase (CISZOG)			8.31341e-12	2.19067e-10		2.94457e-09	2.86248e-11
Solyc04g008500.3	blue	PTHR10593:SF38 - C2H2-LIKE ZINC FINGER PROTEIN-RELATED			0.015531	0.0215825
Solyc04g009050.3	blue	PTHR33334//PTHR33334:SF5 - FAMILY NOT NAMED // DENTIN SIALOPHOSPHOPROTEIN-LIKE PROTEIN			2.94561e-09	7.54165e-13		7.17904e-21	1.36894e-10
Solyc04g009370.3	blue	PF11267 - Domain of unknown function (DUF3067) (DUF3067)			0.000826215	3.93252e-06		0.000931611	0.00658082
Solyc04g009430.3	blue	K11414 - NAD-dependent deacetylase sirtuin 4 [EC:3.5.1.-] (SIRT4, SIR2L4)			2.24181e-06	1.14438e-05		0.000189189	6.67576e-06
Solyc04g009795.1	blue	PTHR31182//PTHR31182:SF2 - FAMILY NOT NAMED // F26K24.5 PROTEIN							0.0277948
Solyc04g010190.1	blue	PTHR14154//PTHR14154:SF15 - UPF0041 BRAIN PROTEIN 44-RELATED // PEPTIDYL-PROLYL CIS-TRANS ISOMERASE, PUTATIVE-RELATED			3.64698e-57	1.84343e-67		7.73161e-76	3.04436e-52
Solyc04g011380.3	blue	PTHR21563//PTHR21563:SF3 - UNCHARACTERIZED // ZINC FINGER C3H1 DOMAIN-CONTAINING PROTEIN			0.0125539	0.00244195		0.000840267	0.0399538
Solyc04g011500.3	blue	PTHR11937//PTHR11937:SF255 - ACTIN // SUBFAMILY NOT NAMED			3.51512e-87	3.32831e-92		2.14341e-103	6.90582e-91
Solyc04g014480.3	blue	PTHR11527:SF142 - 15.7 KDA HEAT SHOCK PROTEIN, PEROXISOMAL				0.00480407		0.0172178
Solyc04g015440.3	blue	PF12854//PF13041 - PPR repeat (PPR_1) // PPR repeat family (PPR_2)			6.6831e-08	1.78784e-06		0.0002268	8.90339e-07
Solyc04g015450.3	blue	K03596 - GTP-binding protein LepA (lepA)			4.46534e-22	1.16362e-26		1.14243e-29	2.69091e-22
Solyc04g015590.3	blue	1.3.1.77 - Anthocyanidin reductase / ANR			0.0053677	0.0190993		0.000873791	0.0122118
Solyc04g015750.3	blue	K03403 - magnesium chelatase subunit H (chlH, bchH)			3.22729e-32	1.64228e-109		1.30722e-144	4.33246e-31
Solyc04g016220.3	blue	K13495 - cis-zeatin O-glucosyltransferase (CISZOG)			1.03555e-09	1.24054e-08		8.02427e-14	2.40221e-13
Solyc04g025530.3	blue	4.1.1.15 - Glutamate decarboxylase / L-glutamate 1-carboxy-lyase				0.0453205
Solyc04g026315.1	blue		0.0350957			0.0295755
Solyc04g039730.3	blue	PTHR27001:SF49 - PROTEIN NSP-INTERACTING KINASE 3			0.00849092	1.83095e-05		0.000603829
Solyc04g040160.3	blue	1.14.12.20 - Pheophorbide a oxygenase / Pheide a oxygenase			2.9909e-49	8.33308e-46		5.40291e-63	2.94077e-54
Solyc04g047720.3	blue	PTHR21397:SF4 - ER MEMBRANE PROTEIN COMPLEX SUBUNIT 10				0.00871265
Solyc04g048950.3	blue	PF01823 - MAC/Perforin domain (MACPF)				0.0109347
Solyc04g050440.3	blue	PTHR11730//PTHR11730:SF39 - AMMONIUM TRANSPORTER // AMMONIUM TRANSPORTER 1 MEMBER 2			2.74768e-27	4.64185e-26		4.43174e-25	3.60888e-27
Solyc04g051150.3	blue	K05841 - sterol 3beta-glucosyltransferase [EC:2.4.1.173] Glc b1-3 sterol (E2.4.1.173)				0.046331	0.00203568	0.0136209
Solyc04g051410.3	blue	K11851 - ubiquitin carboxyl-terminal hydrolase 30 [EC:3.4.19.12] (USP30)						0.0309958
Solyc04g051470.1	blue	PF12023 - Domain of unknown function (DUF3511) (DUF3511)				0.00805183
Solyc04g051800.3	blue	PTHR19211:SF48 - ABC TRANSPORTER F FAMILY MEMBER 2-RELATED			1.70059e-41	5.66088e-49		5.48218e-64	3.19559e-47
Solyc04g051860.3	blue	2.7.1.71 - Shikimate kinase			0.000173313	0.000240571		6.90181e-05	0.000232968
Solyc04g054190.3	blue	PTHR10566//PTHR10566:SF74 - CHAPERONE-ACTIVITY OF BC1 COMPLEX CABC1 -RELATED // ABC TRANSPORTER-LIKE			3.349e-41	5.25391e-100		2.95168e-112	2.72643e-37
Solyc04g054740.3	blue	K01858 - myo-inositol-1-phosphate synthase (E5.5.1.4, INO1)			3.03306e-18	1.1443e-18		1.22322e-16	9.50916e-18
Solyc04g054745.1	blue				1.08615e-21	1.46558e-25		6.68668e-50	2.67009e-34
Solyc04g054890.3	blue	PTHR10909:SF317 - ACYL-COENZYME A OXIDASE 2, PEROXISOMAL			1.00584e-05	2.75885e-05		0.00211153	0.000143554
Solyc04g056580.3	blue	PF10184 - Uncharacterized conserved protein (DUF2358) (DUF2358)			1.15346e-14	2.44917e-13		2.75726e-12	4.11466e-14
Solyc04g057980.3	blue	PF10664 - Cyanobacterial and plastid NDH-1 subunit M (NdhM)			3.68711e-15	2.16048e-14		2.3088e-13	5.95413e-13
Solyc04g057990.3	blue	PTHR23102//PTHR23102:SF13 - ZINC FINGER CLIPPER -RELATED // ZINC FINGER CCCH DOMAIN-CONTAINING PROTEIN 3			0.0204511	0.0294437		0.00170669
Solyc04g058100.3	blue	PF01439 - Metallothionein (Metallothio_2)			0.0417836	0.000193349		0.00137745
Solyc04g064670.3	blue	PTHR31407//PTHR31407:SF18 - FAMILY NOT NAMED // PSBP DOMAIN-CONTAINING PROTEIN 4, CHLOROPLASTIC			2.34992e-26	2.34248e-62		4.84243e-78	7.26308e-26
Solyc04g064930.3	blue	PTHR10681//PTHR10681:SF91 - THIOREDOXIN PEROXIDASE // SUBFAMILY NOT NAMED			4.76021e-16	2.32518e-28		1.40746e-19	5.67894e-13
Solyc04g071330.3	blue	KOG4646 - Uncharacterized conserved protein, contains ARM repeats				0.030295
Solyc04g071340.3	blue				5.70829e-73	1.0223e-74		4.07037e-100	6.84116e-98
Solyc04g071500.3	blue				0.0100345	0.0228127
Solyc04g071700.3	blue	PTHR13017 - 5-FORMYLTETRAHYDROFOLATE CYCLO-LIGASE-RELATED			2.32182e-08	1.9524e-06		1.07222e-05	9.38741e-08
Solyc04g071930.3	blue	PTHR14154//PTHR14154:SF12 - UPF0041 BRAIN PROTEIN 44-RELATED // SUBFAMILY NOT NAMED			7.17478e-24	3.48204e-40		1.81261e-43	1.59683e-22
Solyc04g072050.3	blue	PF07343 - Protein of unknown function (DUF1475) (DUF1475)			1.47759e-20	6.73952e-20		5.04931e-20	3.27718e-23
Solyc04g072610.3	blue						0.0122326
Solyc04g072740.3	blue	K17469 - sulfate transporter 2, low-affinity (SULTR2)			2.80114e-45	1.45173e-43		4.05623e-39	3.39715e-40
Solyc04g074540.3	blue				0.00181855	0.0104761			0.0338163
Solyc04g076830.3	blue	PTHR23029//PTHR23029:SF40 - PHOSPHOGLYCERATE MUTASE // PHOSPHOGLYCERATE MUTASE-LIKE PROTEIN			0.0352924			0.0310165
Solyc04g077140.3	blue	PTHR31317//PTHR31317:SF3 - FAMILY NOT NAMED // F2J10.8 PROTEIN-RELATED			0.00104088	0.000522502		0.00712659	0.00736936
Solyc04g077150.3	blue	KOG3455 - Predicted membrane protein				0.00156411		0.000738802
Solyc04g077460.3	blue	K14207 - solute carrier family 38 (sodium-coupled neutral amino acid transporter), member 2 (SLC38A2, SNAT2)			0.0241579	0.0289558			0.0201957
Solyc04g077470.3	blue	PTHR32044:SF7 - XYLOGLUCAN GLYCOSYLTRANSFERASE 12-RELATED			8.89665e-05	0.000445453		0.00153204	0.00316472
Solyc04g077500.3	blue	PF11255 - Protein of unknown function (DUF3054) (DUF3054)			7.33277e-87	2.02324e-92		1.57625e-79	4.81675e-84
Solyc04g077590.3	blue	PTHR21477//PTHR21477:SF12 - FAMILY NOT NAMED // CF9 PROTEIN-RELATED			0.0260013	0.0459805
Solyc04g077920.3	blue	PTHR12354 - INTERFERON-RELATED DEVELOPMENTAL REGULATOR			1.67383e-19	1.18698e-20		6.05526e-29	4.85548e-27
Solyc04g077980.1	blue	PTHR26374:SF208 - ZINC FINGER PROTEIN AZF3-RELATED				0.035155
Solyc04g078130.3	blue	PTHR19957//PTHR19957:SF118 - SYNTAXIN // SUBFAMILY NOT NAMED			0.0346101
Solyc04g078420.1	blue	PTHR10641:SF483 - TRANSCRIPTION FACTOR MYB44			0.034644
Solyc04g078810.3	blue	PTHR31471:SF13 - REMORIN-LIKE PROTEIN			1.00427e-07	2.17663e-06		0.000455127	4.73535e-06
Solyc04g078920.3	blue	PTHR10094//PTHR10094:SF17 - STEROL CARRIER PROTEIN 2 SCP-2 FAMILY PROTEIN // SUBFAMILY NOT NAMED			0.0215738
Solyc04g079047.1	blue	PTHR11802//PTHR11802:SF57 - SERINE PROTEASE FAMILY S10 SERINE CARBOXYPEPTIDASE // SUBFAMILY NOT NAMED			3.26367e-06	3.68459e-07		1.29962e-10	2.69004e-05
Solyc04g080040.3	blue	PTHR23172//PTHR23172:SF36 - AUXILIN/CYCLIN G-ASSOCIATED KINASE-RELATED // CHAPERONE DNAJ-DOMAIN-CONTAINING PROTEIN-RELATED			5.58438e-96	1.54022e-78		2.34618e-76	9.278e-101
Solyc04g080380.3	blue	PTHR13600:SF12 - LEUCINE CARBOXYL METHYLTRANSFERASE			7.12556e-10	3.14593e-11		1.32866e-11	1.01102e-09
Solyc04g080510.3	blue	PTHR11911 - INOSINE-5-MONOPHOSPHATE DEHYDROGENASE RELATED			0.0412649				0.0328143
Solyc04g080630.3	blue	K02909 - large subunit ribosomal protein L31 (RP-L31, rpmE)			3.30206e-39	2.16309e-39		1.25901e-60	5.92284e-36
Solyc04g081080.1	blue	PTHR27000:SF26 - F10A5.16			0.0389395
Solyc04g081260.3	blue	PTHR31580//PTHR31580:SF4 - FAMILY NOT NAMED // FILAMENT-LIKE PLANT PROTEIN 4-RELATED			3.45549e-05	6.32795e-07		0.000368896	0.000985931
Solyc04g081400.3	blue	2.7.1.1//2.7.1.4//2.7.1.7 - Hexokinase / Hexokinase type IV (glucokinase) // Fructokinase / D-fructokinase // Mannokinase			0.00551119	0.000721404		0.0113128	0.0458851
Solyc04g081420.3	blue				0.00592797	0.0437301		0.0194963	0.0278025
Solyc04g081430.3	blue	K15148 - mediator of RNA polymerase II transcription subunit 7 (MED7)			0.0140361
Solyc04g081700.3	blue				0.0468887
Solyc04g082030.1	blue	PTHR11482//PTHR11482:SF6 - ARGININE/DIAMINOPIMELATE/ORNITHINE DECARBOXYLASE // ORNITHINE DECARBOXYLASE 1-RELATED			2.96146e-05	0.000315991		0.0128808	0.000560961
Solyc04g082250.3	blue	PTHR23076//PTHR23076:SF33 - METALLOPROTEASE M41 FTSH // ATP-DEPENDENT ZINC METALLOPROTEASE FTSH 1, CHLOROPLASTIC-RELATED			0.000814478	0.00018092		0.0012909	0.00319818
Solyc04g082430.3	blue	PTHR10177//PTHR10177:SF217 - CYCLINE // SUBFAMILY NOT NAMED			0.0147912	0.0073576
Solyc04g082790.3	blue	K18655 - ATP-dependent RNA helicase DDX19/DBP5 [EC:3.6.4.13] (DDX19, DBP5)			9.04029e-12	8.28964e-13		1.29355e-12	2.30825e-12
Solyc04g082950.3	blue	PTHR21461:SF12 - F21O3.9 PROTEIN-RELATED			7.98633e-07	3.65865e-06		0.000117728	5.39056e-05
Solyc04g083010.3	blue	PTHR10566//PTHR10566:SF85 - CHAPERONE-ACTIVITY OF BC1 COMPLEX CABC1 -RELATED // SUBFAMILY NOT NAMED			8.42185e-16	5.64058e-21		3.38172e-16	1.15591e-13
Solyc05g005000.3	blue	3.1.1.3//3.1.1.32 - Triacylglycerol lipase / Triglyceride lipase // Phospholipase A(1) / Phospholipase A1			4.73557e-12	5.28731e-12		7.9893e-11	2.06093e-11
Solyc05g005080.3	blue	PTHR22298//PTHR22298:SF36 - ENDO-1,4-BETA-GLUCANASE // ENDOGLUCANASE 21-RELATED			7.70007e-09	1.89595e-10		5.6232e-18	3.48297e-12
Solyc05g005140.3	blue	PTHR27001:SF49 - PROTEIN NSP-INTERACTING KINASE 3			0.0102236
Solyc05g005170.3	blue	PTHR31375:SF46 - PECTIN LYASE-LIKE PROTEIN			8.58931e-05	3.57224e-07		0.000124197	0.00198126
Solyc05g005460.3	blue	K17609 - nucleoredoxin [EC:1.8.1.8] (NXN)			2.15464e-82	2.60087e-85		5.50645e-109	7.89677e-76
Solyc05g005490.3	blue	PTHR11002//PTHR11002:SF15 - CARBONIC ANHYDRASE // CARBONIC ANHYDRASE			0.00469272	0.000830073		0.017116	0.0401727
Solyc05g005580.3	blue	PF06075 - Plant protein of unknown function (DUF936) (DUF936)				0.0442842		0.0376837
Solyc05g006050.3	blue	PTHR10177:SF206 - CYCLIN-D1-1			0.000132077	0.00104281		0.00270259	8.33732e-05
Solyc05g006390.1	blue				4.59717e-06	4.16754e-05		0.00303068	6.57457e-05
Solyc05g006580.3	blue					0.0446054
Solyc05g006660.3	blue	PTHR31558:SF3 - CW14 PROTEIN			0.000186345	0.00334805			0.00306202
Solyc05g006730.3	blue	PTHR11260//PTHR11260:SF291 - GLUTATHIONE S-TRANSFERASE, GST, SUPERFAMILY, GST DOMAIN CONTAINING // SUBFAMILY NOT NAMED			8.54848e-06	3.8644e-06		2.79788e-06	8.7165e-06
Solyc05g007090.3	blue	PTHR23002//PTHR23002:SF11 - ZINC FINGER CCHC DOMAIN CONTAINING PROTEIN // ZINC FINGER CCHC DOMAIN-CONTAINING PROTEIN 7			0.00103418	0.0144642			0.00274676
Solyc05g007500.3	blue	PTHR10794:SF53 - CAAX AMINO TERMINAL PROTEASE FAMILY PROTEIN			2.78605e-05	1.29314e-06		6.42685e-05	0.000583587
Solyc05g007800.3	blue	PTHR10358//PTHR10358:SF8 - ENDOSULFINE // SUBFAMILY NOT NAMED			0.0108581	0.00405842		0.00167154	0.00287342
Solyc05g007880.3	blue	PTHR31089//PTHR31089:SF1 - FAMILY NOT NAMED // CYCLIC DOF FACTOR 4-RELATED			9.8207e-11	2.22064e-09		3.42922e-07	2.3104e-09
Solyc05g007970.3	blue	1.14.11.18 - Phytanoyl-CoA dioxygenase / Phytanoyl-CoA hydroxylase			0.0388059	0.000747938		0.0433303
Solyc05g008060.3	blue	K13947 - auxin efflux carrier family (PIN)			4.79365e-08	3.57643e-10		1.28091e-14	3.48287e-10
Solyc05g008100.1	blue	PTHR37702//PTHR37702:SF1 - FAMILY NOT NAMED // HYDROXYPROLINE-RICH GLYCOPROTEIN FAMILY PROTEIN			7.43407e-13	1.34328e-10		1.18381e-07	1.31228e-09
Solyc05g008110.3	blue				9.96782e-12	1.62398e-11		4.1347e-14	1.12167e-13
Solyc05g008200.3	blue	PTHR11353:SF101 - 1-PHOSPHATIDYLINOSITOL-3-PHOSPHATE 5-KINASE FAB1C-RELATED			1.66863e-07	9.54783e-09		1.46846e-07	6.69392e-07
Solyc05g008580.3	blue	2.7.8.8 - CDP-diacylglycerol--serine O-phosphatidyltransferase / Phosphatidylserine synthase			1.7013e-07	2.07615e-06		1.90593e-05	2.36475e-07
Solyc05g008920.3	blue	PF05623 - Protein of unknown function (DUF789) (DUF789)			1.88342e-27	4.22096e-32		2.74906e-27	1.18591e-24
Solyc05g009080.3	blue	PF03364 - Polyketide cyclase / dehydrase and lipid transport (Polyketide_cyc)			2.1042e-10	2.99801e-11		2.6746e-10	4.38099e-11
Solyc05g009420.1	blue				2.73177e-29	7.89615e-25		5.82168e-27	7.69402e-26
Solyc05g009910.3	blue	K13115 - coiled-coil domain-containing protein 130 (CCDC130)	0.00293697			0.00103986	0.00435439	0.0047724
Solyc05g009930.3	blue	KOG1103 - Predicted coiled-coil protein			4.68082e-05	9.59238e-05		0.00275444	0.000939135
Solyc05g010140.3	blue	PTHR27001:SF6 - PROLINE-RICH RECEPTOR-LIKE PROTEIN KINASE PERK10-RELATED			0.000969388	0.00294567		0.0214493	0.00860762
Solyc05g010810.2	blue					0.0359856
Solyc05g011890.1	blue	PTHR11783//PTHR11783:SF84 - SULFOTRANSFERASE SULT // SUBFAMILY NOT NAMED			1.46274e-21	1.64386e-22		7.34359e-38	2.1007e-30
Solyc05g012130.3	blue	PTHR24361:SF268 - SERINE/THREONINE-PROTEIN KINASE 3			0.0298707	0.00502732		0.00765771
Solyc05g012230.3	blue	PTHR33476:SF7 - EMB|CAB62613.1			0.0162715
Solyc05g012600.3	blue				4.1196e-11	2.31995e-12		4.81328e-12	7.25872e-10
Solyc05g012620.3	blue	PF08755 - Hemimethylated DNA-binding protein YccV like (YccV-like)			2.99464e-17	1.04134e-18		1.03682e-17	1.96642e-15
Solyc05g012700.3	blue	PTHR36716:SF2 - F3H9.20 PROTEIN			0.00093745	0.00398834		0.0446287	0.00641403
Solyc05g013240.3	blue	PF04398 - Protein of unknown function, DUF538 (DUF538)			0.0341136	0.0382198		0.0175417
Solyc05g013370.1	blue	PTHR11945:SF176 - PROTEIN AGAMOUS-LIKE 82			0.00768384
Solyc05g013380.3	blue	2.3.2.2//2.6.1.2//2.6.1.4//2.6.1.44 - Gamma-glutamyltransferase / Glutamyl transpeptidase // Alanine transaminase / Glutamic--pyruvic transaminase // Glycine transaminase / Glycine aminotransferase // Alanine--glyoxylate transaminase / Alanine--glyoxylate aminotransferase			1.21498e-55	1.20845e-64		2.45349e-97	8.14416e-77
Solyc05g013510.3	blue	K14640 - solute carrier family 20 (sodium-dependent phosphate transporter) (SLC20A, PIT)			5.93915e-24	5.0404e-23		4.47722e-25	8.29435e-28
Solyc05g013570.3	blue	PF03000 - NPH3 family (NPH3)			5.22159e-08	1.05624e-06		0.000155889	2.93819e-06
Solyc05g013620.2	blue					7.74127e-05		0.000684393
Solyc05g013680.3	blue	PTHR22835//PTHR22835:SF162 - ZINC FINGER FYVE DOMAIN CONTAINING PROTEIN // SUBFAMILY NOT NAMED			0.0240145	0.0125039
Solyc05g014000.3	blue	PTHR31683//PTHR31683:SF26 - FAMILY NOT NAMED // PECTATE LYASE 5-RELATED			1.59376e-10	2.04416e-28		1.01547e-27	5.63769e-09
Solyc05g014190.3	blue	PTHR10794//PTHR10794:SF52 - ABHYDROLASE DOMAIN-CONTAINING PROTEIN // CAAX AMINO TERMINAL PROTEASE FAMILY PROTEIN			0.000443288	0.0067548			0.00444775
Solyc05g014250.3	blue	PTHR15315//PTHR15315:SF22 - RING FINGER PROTEIN 41, 151 // SUBFAMILY NOT NAMED			1.59213e-06	3.36103e-05		0.000386949	1.57251e-05
Solyc05g014510.3	blue	PTHR24198//PTHR24198:SF77 - ANKYRIN REPEAT AND PROTEIN KINASE DOMAIN-CONTAINING PROTEIN // SUBFAMILY NOT NAMED			1.25957e-05	6.36093e-06		5.89478e-05	3.0251e-05
Solyc05g015630.3	blue	PTHR12612 - NUCLEAR TRANSPORT FACTOR 2			0.00632043			4.43247e-05	2.93206e-07
Solyc05g015656.1	blue	PTHR16007//PTHR16007:SF23 - EPIDIDYMAL MEMBRANE PROTEIN E9-RELATED // SUBFAMILY NOT NAMED			0.000649392	0.008256			0.0028144
Solyc05g015800.3	blue	2.3.1.196//2.3.1.232 - Benzyl alcohol O-benzoyltransferase // Methanol O-anthraniloyltransferase			2.21008e-34	2.8973e-71		1.54436e-103	5.30852e-38
Solyc05g015840.3	blue	PF03110 - SBP domain (SBP)			4.87041e-11	1.2853e-08		2.01558e-08	5.30357e-10
Solyc05g018125.1	blue	PTHR10209:SF146 - 2-OXOGLUTARATE (2OG) AND FE(II)-DEPENDENT OXYGENASE SUPERFAMILY PROTEIN-RELATED			0.000160863	0.000359767		0.00904959	0.00442018
Solyc05g018300.3	blue	2.7.11.12 - cGMP-dependent protein kinase / PKG II			0.0136335				0.039508
Solyc05g018340.3	blue	PTHR23238 - RNA BINDING PROTEIN			0.0215065	0.0311864
Solyc05g018615.1	blue	PTHR22870//PTHR22870:SF193 - REGULATOR OF CHROMOSOME CONDENSATION // SUBFAMILY NOT NAMED			8.90233e-08	9.09237e-09		1.01646e-06	1.51351e-06
Solyc05g023720.1	blue	K02634 - apocytochrome f (petA)			1.49056e-06	1.59151e-05		0.00213731	7.75352e-05
Solyc05g024260.3	blue	PTHR10791//PTHR10791:SF34 - RAG1-ACTIVATING PROTEIN 1 // BIDIRECTIONAL SUGAR TRANSPORTER SWEET15			2.00167e-28	1.25929e-35		8.94184e-51	5.38716e-35
Solyc05g025590.3	blue	PTHR23273//PTHR23273:SF15 - REPLICATION FACTOR A 1, RFA1 // REPLICATION PROTEIN A 70 KDA DNA-BINDING SUBUNIT A			0.0396485	0.0379339
Solyc05g025810.3	blue	PTHR10426//PTHR10426:SF35 - STRICTOSIDINE SYNTHASE-RELATED // SUBFAMILY NOT NAMED			1.0303e-06	7.9142e-07		0.000686923	6.46062e-05
Solyc05g025890.2	blue	PTHR23091//PTHR23091:SF278 - N-TERMINAL ACETYLTRANSFERASE // ACYL-COA N-ACYLTRANSFERASES-LIKE PROTEIN			0.00116822	4.80447e-07		8.82052e-05	0.00820101
Solyc05g025905.1	blue	2.4.1.21 - Starch synthase / Starch (bacterial glycogen) synthase			0.0246008	0.0433788
Solyc05g026470.2	blue	PTHR22847//PTHR22847:SF415 - WD40 REPEAT PROTEIN // SUBFAMILY NOT NAMED			0.00304654	0.0262291		0.0487201	0.0217737
Solyc05g032660.3	blue	PTHR24314:SF6 - CHLOROPHYLL(IDE) B REDUCTASE NOL, CHLOROPLASTIC			2.13032e-13	1.55054e-22		4.61811e-24	3.26889e-11
Solyc05g041200.3	blue	1.13.11.27 - 4-hydroxyphenylpyruvate dioxygenase / p-hydroxyphenylpyruvate oxidase			9.1143e-17	2.82333e-16		7.12066e-18	7.96217e-20
Solyc05g041430.3	blue				3.31076e-16	5.67376e-18		6.68347e-15	2.10348e-15
Solyc05g044630.3	blue	PTHR11178:SF25 - NIFU-LIKE PROTEIN 3, CHLOROPLASTIC			2.59946e-19	1.80064e-18		1.98298e-14	5.37557e-17
Solyc05g045650.3	blue	PTHR18966//PTHR18966:SF190 - IONOTROPIC GLUTAMATE RECEPTOR // GLUTAMATE RECEPTOR 3.4-RELATED			0.0303357
Solyc05g047680.3	blue	PTHR24298//PTHR24298:SF46 - FAMILY NOT NAMED // CYTOCHROME P450 78A6-RELATED	0.00663938		0.021017	5.11302e-13		1.30044e-07
Solyc05g050000.3	blue	K15190 - 7SK snRNA methylphosphate capping enzyme [EC:2.1.1.-] (MEPCE, BCDIN3)			4.1968e-12	8.99328e-11		1.13658e-08	4.33643e-11
Solyc05g050550.3	blue				2.92559e-31	3.01498e-27		7.39706e-38	2.84394e-33
Solyc05g050770.3	blue	K16296 - serine carboxypeptidase-like clade I [EC:3.4.16.-] (SCPL-I)			4.60443e-11	4.09682e-15		1.06144e-14	5.43385e-11
Solyc05g051425.1	blue	PTHR22778//PTHR22778:SF23 - OVARIAN CANCER GENE-2 PROTEIN-RELATED // SUBFAMILY NOT NAMED	0.0210676		1.27367e-05	3.3347e-26		3.16611e-27	0.00019225
Solyc05g051515.1	blue	K11253 - histone H3 (H3)			0.00329596	0.0282167		0.0247616	0.0175184
Solyc05g051580.3	blue	PTHR32370//PTHR32370:SF37 - FAMILY NOT NAMED // BTB/POZ DOMAIN-CONTAINING PROTEIN DOT3-RELATED			6.57916e-33	7.14622e-31		4.59942e-31	6.71577e-34
Solyc05g051710.3	blue	PF05627 - Cleavage site for pathogenic type III effector avirulence factor Avr (AvrRpt-cleavage)			5.82076e-05	0.000649551		0.010196	0.000761018
Solyc05g051840.1	blue	PTHR21581 - D-ALANYL-D-ALANINE CARBOXYPEPTIDASE						0.0480514
Solyc05g051850.3	blue	K01858 - myo-inositol-1-phosphate synthase (E5.5.1.4, INO1)			3.51512e-87	1.26071e-90		6.2632e-152	2.8325e-128
Solyc05g052240.3	blue	PTHR28039//PTHR28039:SF4 - FAMILY NOT NAMED // CHALCONE--FLAVONONE ISOMERASE 3-RELATED			9.57676e-29	2.50189e-33		1.60857e-78	1.14549e-38
Solyc05g052580.3	blue	K15731 - carboxy-terminal domain RNA polymerase II polypeptide A small phosphatase [EC:3.1.3.16] (CTDSP)			0.0255406
Solyc05g052950.3	blue	PTHR22870:SF172 - REGULATOR OF CHROMOSOME CONDENSATION (RCC1) FAMILY PROTEIN			0.0147961				0.0421869
Solyc05g053810.3	blue	PTHR11680//PTHR11680:SF11 - SERINE HYDROXYMETHYLTRANSFERASE // SUBFAMILY NOT NAMED			1.93781e-08	8.05024e-09		1.18378e-07	7.66788e-07
Solyc05g053850.3	blue	PTHR11362//PTHR11362:SF9 - PHOSPHATIDYLETHANOLAMINE-BINDING PROTEIN // PROTEIN FLOWERING LOCUS T-RELATED			0.00696177	0.0301885
Solyc05g053890.2	blue	PTHR11926//PTHR11926:SF159 - GLUCOSYL/GLUCURONOSYL TRANSFERASES // UDP-GLYCOSYLTRANSFERASE 92A1			6.21259e-06	4.11452e-06		0.000137707	0.000157768
Solyc05g054210.3	blue	PTHR22814//PTHR22814:SF79 - COPPER TRANSPORT PROTEIN ATOX1-RELATED // SUBFAMILY NOT NAMED			0.0219232	0.0159723			0.0458926
Solyc05g054320.3	blue	PTHR10992:SF829 - ALPHA/BETA-HYDROLASES SUPERFAMILY PROTEIN			3.06095e-05	0.000450914		0.00165373	0.00114983
Solyc05g054540.3	blue	K10575 - ubiquitin-conjugating enzyme E2 G1 (UBE2G1, UBC7)			0.00286086	0.0353733			0.0280451
Solyc05g055343.1	blue	PTHR11926//PTHR11926:SF414 - GLUCOSYL/GLUCURONOSYL TRANSFERASES // SUBFAMILY NOT NAMED			0.00521163	0.00775173		0.00607772	0.0172721
Solyc05g055460.1	blue				2.67392e-34	2.30583e-30		8.25763e-24	4.6302e-31
Solyc05g055680.3	blue	PTHR34124:SF2 - F16B3.27 PROTEIN			2.65747e-08	1.90747e-11		3.11779e-12	9.46667e-08
Solyc05g055745.1	blue				6.13e-07	4.00057e-07		0.000357901	6.21334e-05
Solyc05g055750.3	blue	PTHR31221:SF1 - WRKY TRANSCRIPTION FACTOR 1-RELATED			4.13964e-12	5.88243e-10		1.84087e-06	8.8867e-10
Solyc05g055850.3	blue				4.06966e-19	2.88367e-17		1.72153e-17	1.63266e-20
Solyc05g056170.3	blue	PTHR10362//PTHR10362:SF19 - HISTIDINE AMMONIA-LYASE // SUBFAMILY NOT NAMED			4.48631e-07	2.81248e-06		2.12924e-05	3.59656e-07
Solyc05g056270.3	blue	4.1.3.32 - 2,3-dimethylmalate lyase / (2R,3S)-2,3-dimethylmalate pyruvate-lyase						0.0456944	0.0246033
Solyc05g056300.3	blue	PTHR10438//PTHR10438:SF258 - THIOREDOXIN // THIOREDOXIN F1, CHLOROPLASTIC-RELATED			1.21678e-22	2.43438e-39		1.45839e-69	6.86919e-25
Solyc05g056470.1	blue	PTHR19241//PTHR19241:SF230 - ATP-BINDING CASSETTE TRANSPORTER // ABC TRANSPORTER G FAMILY MEMBER 5			2.98952e-16	3.11153e-13		1.40872e-08	2.01244e-13
Solyc05g056520.3	blue	PTHR12303:SF6 - UPF0586 PROTEIN C9ORF41			6.25958e-07	8.63577e-06		0.000263275	1.35004e-05
Solyc06g007590.3	blue	PTHR23089:SF7 - HIT FAMILY PROTEIN 1			0.000673401	0.00230845		7.14323e-05	6.35961e-05
Solyc06g007800.3	blue	PTHR14110//PTHR14110:SF10 - MITOCHONDRIAL IMPORT INNER MEMBRANE TRANSLOCASE SUBUNIT TIM22 // SUBFAMILY NOT NAMED			0.0171466
Solyc06g007890.3	blue	PTHR23201//PTHR23201:SF1 - EXTENSIN, PROLINE-RICH PROTEIN // GIBBERELLIN-REGULATED PROTEIN 12-RELATED			3.60986e-15	2.01883e-13		1.13757e-16	7.75571e-16
Solyc06g008580.3	blue	K14484 - auxin-responsive protein IAA (IAA)			0.0138942
Solyc06g008980.3	blue				0.00505413	0.00364468			0.032306
Solyc06g009040.3	blue	PTHR11260:SF201 - GLUTATHIONE S-TRANSFERASE F14-RELATED			0.0109678				0.0261802
Solyc06g009120.3	blue				5.35719e-15	5.51666e-13		4.02852e-09	6.62229e-13
Solyc06g009270.3	blue	K00901 - diacylglycerol kinase (ATP) (dgkA, DGK)			0.0216366
Solyc06g009770.1	blue				0.00954358
Solyc06g009985.1	blue	PF03947 - Ribosomal Proteins L2, C-terminal domain (Ribosomal_L2_C)			0.000184327	0.00265268		0.0274994	0.000659926
Solyc06g011540.3	blue	PTHR13140:SF390 - MYOSIN-11-RELATED			0.0125989	0.0280024		0.0235211	0.0213418
Solyc06g016790.2	blue				0.00148233	0.000891867		0.0285138	0.0224955
Solyc06g034310.3	blue	PF12776 - Myb/SANT-like DNA-binding domain (Myb_DNA-bind_3)				0.0487458
Solyc06g035690.3	blue	PTHR13148//PTHR13148:SF2 - PER1-RELATED // PER1-LIKE FAMILY PROTEIN			0.0450317
Solyc06g036130.3	blue	PTHR11206//PTHR11206:SF152 - MULTIDRUG RESISTANCE PROTEIN // MATE EFFLUX FAMILY PROTEIN			9.38753e-05	0.000511624		0.000885476	0.00120594
Solyc06g036260.3	blue	1.14.13.129 - Beta-carotene 3-hydroxylase / Beta-carotene 3,3'-monooxygenase			2.00719e-157	3.06901e-241		0	2.61368e-165
Solyc06g043036.1	blue	PF10839 - Protein of unknown function (DUF2647) (DUF2647)			2.04943e-06	3.64582e-05		0.00124427	2.43735e-05
Solyc06g048850.3	blue								0.0375053
Solyc06g048950.3	blue	PTHR27000//PTHR27000:SF197 - FAMILY NOT NAMED // INFLORESCENCE AND ROOT APICES RECEPTOR-LIKE KINASE			0.0220054
Solyc06g050370.1	blue	PTHR33257//PTHR33257:SF5 - FAMILY NOT NAMED // EXPRESSED PROTEIN				0.0375342
Solyc06g051400.3	blue	PTHR32100:SF17 - OMEGA-3 FATTY ACID DESATURASE, ENDOPLASMIC RETICULUM			9.56874e-32	5.60569e-52		1.07745e-103	5.46844e-42
Solyc06g051930.3	blue	PTHR11817:SF28 - PLASTIDIAL PYRUVATE KINASE 4, CHLOROPLASTIC			4.43651e-13	3.69956e-11		3.83605e-07	1.80767e-10
Solyc06g052010.2	blue	PTHR32295:SF33 - PROTEIN IQ-DOMAIN 21			0.0108022				0.0319624
Solyc06g052060.3	blue				0.00745372	0.000760729		0.0218584	0.0362693
Solyc06g053440.3	blue								0.0299412
Solyc06g053480.3	blue	PTHR31155//PTHR31155:SF9 - ACYL- ACYL-CARRIER-PROTEIN DESATURASE-RELATED // ACYL-[ACYL-CARRIER-PROTEIN] DESATURASE 7, CHLOROPLASTIC			2.92445e-18	1.67227e-46		1.40415e-106	1.89146e-16
Solyc06g053670.1	blue	PTHR11941//PTHR11941:SF84 - ENOYL-COA HYDRATASE-RELATED // SUBFAMILY NOT NAMED			0.0196263	0.017664		0.00708052	0.00532161
Solyc06g053760.3	blue	PTHR19957:SF91 - SYNTAXIN-RELATED PROTEIN KNOLLE				0.00106007		3.98412e-05	0.0163807
Solyc06g053830.3	blue	PTHR31734:SF30 - AUXIN-RESPONSIVE PROTEIN IAA14-RELATED			9.52875e-09	1.23845e-12		2.5294e-12	1.11245e-08
Solyc06g053840.3	blue	PTHR31734//PTHR31734:SF11 - FAMILY NOT NAMED // AUXIN-RESPONSIVE PROTEIN IAA1-RELATED			0.0197539	0.0274943
Solyc06g053910.3	blue	PF04720 - PDDEXK-like family of unknown function (PDDEXK_6)			4.06624e-05	1.93905e-05		0.000198649	0.000140359
Solyc06g059805.1	blue	PF07734 - F-box associated (FBA_1)			0.000481317	0.000700428		0.00147358	0.00106115
Solyc06g060310.3	blue	K13600 - chlorophyllide a oxygenase (CAO)			4.35809e-24	1.08861e-40		2.36684e-35	5.92334e-21
Solyc06g060340.3	blue	K03542 - photosystem II 22kDa protein (psbS)			1.00298e-214	1.6845e-222		0	5.9472e-270
Solyc06g060610.2	blue	PTHR23023:SF94 - FLAVIN-CONTAINING MONOOXYGENASE FMO GS-OX-LIKE 1-RELATED			0.00044602	0.000479401		0.0110816	0.0045879
Solyc06g060630.1	blue	PF00999 - Sodium/hydrogen exchanger family (Na_H_Exchanger)			1.07849e-06	2.74928e-05		0.000435873	6.95617e-06
Solyc06g061055.1	blue				0.000915003	0.00518835			0.0135104
Solyc06g061070.3	blue	K02437 - glycine cleavage system H protein (gcvH, GCSH)			1.38199e-59	9.50712e-67		1.89746e-70	2.06503e-65
Solyc06g061100.3	blue	PTHR31086:SF2 - ALUMINUM-ACTIVATED MALATE TRANSPORTER 12-RELATED			5.83943e-12	4.42499e-10		2.79575e-07	1.23742e-09
Solyc06g062900.3	blue	PTHR12264:SF3 - TRANSCRIPTION INITIATION FACTOR TFIID SUBUNIT 12B			9.83185e-08	9.41471e-06		5.47889e-05	2.21699e-06
Solyc06g063020.3	blue	PF00642//PF02037 - Zinc finger C-x8-C-x5-C-x3-H type (and similar) (zf-CCCH) // SAP domain (SAP)			0.0308005				0.0165364
Solyc06g063280.1	blue	PTHR31717//PTHR31717:SF11 - FAMILY NOT NAMED // B-BOX TYPE ZINC FINGER-CONTAINING PROTEIN			7.04149e-19	7.93855e-16		6.1067e-14	6.24821e-21
Solyc06g064570.3	blue	PTHR12677:SF5 - TVP38/TMEM64 FAMILY MEMBRANE PROTEIN YDJX			4.77999e-12	1.86446e-12		1.41628e-11	7.23454e-11
Solyc06g064610.1	blue				4.51783e-11	2.04743e-14		1.72705e-12	1.66092e-09
Solyc06g065200.3	blue				3.976e-14	1.61828e-11		6.39288e-09	1.83043e-12
Solyc06g065690.3	blue	PTHR10257:SF25 - SERINE/THREONINE PROTEIN PHOSPHATASE 2A 57 KDA REGULATORY SUBUNIT B' IOTA ISOFORM			2.27781e-06	8.72158e-10		6.74027e-16	1.17423e-09
Solyc06g065990.1	blue	K02109 - F-type H+-transporting ATPase subunit b (ATPF0B, atpF)			6.67164e-31	4.10262e-28		5.9092e-29	3.53778e-29
Solyc06g066420.3	blue	PTHR33172:SF2 - EMB|CAB83157.1							0.0323836
Solyc06g066610.3	blue	KOG4673 - Transcription factor TMF, TATA element modulatory factor			0.016582
Solyc06g066620.3	blue	PTHR33222//PTHR33222:SF3 - FAMILY NOT NAMED // PROTEIN CURVATURE THYLAKOID 1C, CHLOROPLASTIC			5.67856e-28	2.14014e-37		3.16833e-35	1.06351e-24
Solyc06g066700.1	blue				9.08774e-09	1.6108e-09		1.15213e-25	1.21629e-16
Solyc06g066750.3	blue				0.000125039	0.000640998		0.000171671	0.00092564
Solyc06g066760.3	blue	PTHR10159//PTHR10159:SF334 - DUAL SPECIFICITY PROTEIN PHOSPHATASE // SUBFAMILY NOT NAMED			0.0109101	0.034413
Solyc06g066860.2	blue				0.0121413	0.0115515		0.0184004	0.00709063
Solyc06g067910.3	blue	PF04862 - Protein of unknown function (DUF642) (DUF642)			6.99666e-06	2.67354e-09		2.77783e-13	1.0229e-05
Solyc06g068220.3	blue	PTHR10992:SF730 - HYDROLASE-RELATED			2.07387e-14	7.65198e-20		2.69236e-22	2.00822e-14
Solyc06g068230.3	blue	PTHR12601:SF18 - TETRATRICOPEPTIDE REPEAT-CONTAINING PROTEIN			5.82232e-25	8.54607e-24		1.31439e-20	5.72635e-22
Solyc06g068470.3	blue	2.1.1.71 - Phosphatidyl-N-methylethanolamine N-methyltransferase			0.0126876
Solyc06g068720.3	blue	PTHR24089//PTHR24089:SF294 - FAMILY NOT NAMED // CALCIUM-BINDING TRANSPORTER-LIKE PROTEIN			0.00359905	0.0180923			0.0319561
Solyc06g068740.3	blue	K00079 - carbonyl reductase 1 (CBR1)			6.13779e-10	7.38041e-10		1.46846e-07	2.27613e-08
Solyc06g068780.3	blue	KOG3808 - Uncharacterized conserved protein							0.0107119
Solyc06g068970.3	blue	1.3.99.5 - 3-oxo-5-alpha-steroid 4-dehydrogenase (acceptor) / Steroid 5-alpha-reductase			1.09607e-47	6.47974e-46		9.32262e-46	4.5889e-51
Solyc06g068980.3	blue	PTHR23257:SF466 - MAPKKK-LIKE KINASE-RELATED			7.63312e-10	3.73176e-10		1.37389e-07	2.71698e-08
Solyc06g069030.3	blue				5.26876e-22	2.15138e-19		6.73154e-25	1.0858e-23
Solyc06g069240.2	blue	PTHR31072//PTHR31072:SF6 - FAMILY NOT NAMED // TRANSCRIPTION FACTOR TCP18						0.0365163	0.0189683
Solyc06g069460.2	blue	PTHR31072:SF24 - TRANSCRIPTION FACTOR TCP17-RELATED			0.0209202
Solyc06g069580.3	blue	PTHR14363//PTHR14363:SF17 - HEPARANASE-RELATED // HEPARANASE-LIKE PROTEIN 1-RELATED			0.0087001				0.0411131
Solyc06g069640.3	blue	K16904 - dCTP diphosphatase (DCTPP1)			0.0100091	0.0401555		0.003648	0.00515824
Solyc06g071015.1	blue				0.0253005	0.0422171
Solyc06g071560.3	blue	PTHR11871//PTHR11871:SF12 - PROTEIN PHOSPHATASE PP2A REGULATORY SUBUNIT B // SUBFAMILY NOT NAMED			0.016208
Solyc06g072050.3	blue	PTHR13780//PTHR13780:SF45 - AMP-ACTIVATED PROTEIN KINASE, GAMMA REGULATORY SUBUNIT // CBS DOMAIN-CONTAINING PROTEIN CBSCBSPB4-RELATED			0.0279852	0.0344314		0.00759544	0.0105411
Solyc06g072510.3	blue	PF00153//PF00583 - Mitochondrial carrier protein (Mito_carr) // Acetyltransferase (GNAT) family (Acetyltransf_1)			0.0498969
Solyc06g072710.3	blue	K03086 - RNA polymerase primary sigma factor (SIG1, rpoD)			2.51797e-44	7.11135e-49		5.17646e-75	3.40675e-61
Solyc06g073180.3	blue	PTHR31832:SF8 - B-BOX TYPE ZINC FINGER-CONTAINING PROTEIN-RELATED			4.37912e-77	9.69476e-77		3.44826e-67	9.99392e-74
Solyc06g073245.1	blue	PTHR10891:SF586 - CALMODULIN-LIKE PROTEIN 6-RELATED			5.51893e-05	0.00149603		0.00666577	0.000233643
Solyc06g073260.3	blue	PTHR10366//PTHR10366:SF289 - NAD DEPENDENT EPIMERASE/DEHYDRATASE // CHLOROPLAST STEM-LOOP BINDING PROTEIN OF 41 KDA B, CHLOROPLASTIC			2.30622e-55	1.43549e-76		2.95168e-112	1.94197e-68
Solyc06g073450.3	blue	PF07939 - Protein of unknown function (DUF1685) (DUF1685)			2.153e-24	9.60329e-29		9.91772e-31	8.72652e-24
Solyc06g074010.3	blue	K06620 - transcription factor E2F3 (E2F3)				0.0049452
Solyc06g074120.3	blue	PTHR11850//PTHR11850:SF79 - HOMEOBOX PROTEIN TRANSCRIPTION FACTORS // SUBFAMILY NOT NAMED			7.89964e-15	5.98807e-16		9.18986e-19	8.28163e-18
Solyc06g074260.3	blue	PTHR33083//PTHR33083:SF5 - FAMILY NOT NAMED // POLLEN OLE E 1 ALLERGEN AND EXTENSIN FAMILY PROTEIN							0.0199172
Solyc06g074670.3	blue	K12449 - UDP-apiose/xylose synthase (AXS)			1.91837e-29	4.8777e-35		2.61721e-34	2.9028e-26
Solyc06g074800.1	blue	PTHR26374//PTHR26374:SF179 - FAMILY NOT NAMED // C2H2-TYPE ZINC FINGER PROTEIN			1.64231e-09	1.03183e-07		3.45521e-06	3.77573e-09
Solyc06g075080.3	blue	K03426 - NAD+ diphosphatase (E3.6.1.22, NUDT12, nudC)			2.81319e-31	3.97106e-35		1.31551e-31	8.70482e-29
Solyc06g075640.2	blue	PF00515 - Tetratricopeptide repeat (TPR_1)			0.0405159
Solyc06g075660.3	blue	PTHR10641//PTHR10641:SF484 - MYB-LIKE DNA-BINDING PROTEIN MYB // TRANSCRIPTION FACTOR MYB48-RELATED			0.00154837	0.0273696			0.0175978
Solyc06g076250.3	blue				0.0448556				0.0135758
Solyc06g076480.3	blue	PF00805 - Pentapeptide repeats (8 copies) (Pentapeptide)			0.00821207	0.0386989			0.0367737
Solyc06g076640.3	blue	PTHR11588//PTHR11588:SF97 - TUBULIN // TUBULIN BETA-4 CHAIN-RELATED			1.94119e-11	4.91068e-10		1.72474e-14	2.14626e-13
Solyc06g076790.1	blue	PF11493 - Thylakoid soluble phosphoprotein TSP9 (TSP9)			1.63457e-51	2.58681e-55		1.93856e-39	4.21528e-49
Solyc06g081980.1	blue	K06215 - pyridoxal 5'-phosphate synthase pdxS subunit (pdxS, pdx1)			6.91285e-29	8.37165e-29		1.37812e-17	2.13497e-26
Solyc06g082155.1	blue	2.7.1.105 - 6-phosphofructo-2-kinase / Phosphofructokinase 2			7.19047e-07	4.73096e-08		4.99784e-05	4.43191e-05
Solyc06g082520.3	blue	PTHR23336//PTHR23336:SF23 - ZINC FINGER CW-TYPE COILED-COIL DOMAIN PROTEIN 3. // SUBFAMILY NOT NAMED			0.00368196	0.00602512			0.0388369
Solyc06g082535.1	blue	PTHR24298//PTHR24298:SF56 - FAMILY NOT NAMED // TRANS-CINNAMATE 4-MONOOXYGENASE			0.0261943
Solyc06g082860.3	blue	PTHR23130//PTHR23130:SF78 - FAMILY NOT NAMED // CYTOCHROME B561/FERRIC REDUCTASE TRANSMEMBRANE WITH DOMON RELATED DOMAIN			0.00593808	0.0187464
Solyc06g082970.3	blue	PF00226 - DnaJ domain (DnaJ)			7.08105e-26	2.84227e-28		1.70354e-44	1.48771e-27
Solyc06g083660.3	blue	PTHR21726//PTHR21726:SF36 - PHOSPHATIDYLINOSITOL N-ACETYLGLUCOSAMINYLTRANSFERASE SUBUNIT P DOWN SYNDROME CRITICAL REGION PROTEIN 5 -RELATED // SUBFAMILY NOT NAMED			0.000384337	0.00022959		0.00443953	0.00165374
Solyc06g084045.1	blue	PTHR34552:SF1 - PHOTOSYSTEM II REACTION CENTER W PROTEIN, CHLOROPLASTIC			3.18655e-05	1.02076e-06		7.2713e-05	0.000251108
Solyc06g084290.3	blue	PTHR32285:SF65 - PROTEIN TRICHOME BIREFRINGENCE-LIKE 10-RELATED			0.0031374	0.0228098		0.0443775	0.0259019
Solyc06g084300.1	blue				0.00585507				0.0276571
Solyc06g084760.2	blue	PTHR24282//PTHR24282:SF21 - CYTOCHROME P450 FAMILY MEMBER // SUBFAMILY NOT NAMED			0.00106912	0.00699761			0.00364689
Solyc07g005330.3	blue	PTHR32227:SF62 - GLUCOSIDASE-LIKE PROTEIN			7.79812e-11	3.63125e-09		2.44015e-07	1.24428e-08
Solyc07g005360.3	blue	PTHR32116//PTHR32116:SF0 - FAMILY NOT NAMED // GALACTURONOSYLTRANSFERASE 5-RELATED			0.0403015
Solyc07g005370.3	blue	4.2.1.78 - (S)-norcoclaurine synthase / (S)-norlaudanosoline synthase			1.49205e-48	7.31012e-68		7.52978e-109	2.72969e-61
Solyc07g005390.3	blue	1.2.1.9 - Glyceraldehyde-3-phosphate dehydrogenase (NADP(+)) / Triosephosphate dehydrogenase			3.64161e-75	4.09934e-75		9.56397e-100	1.31519e-91
Solyc07g005510.3	blue	K10255 - omega-6 fatty acid desaturase (delta-12 desaturase) (FAD6, desA)			5.21022e-62	2.3937e-116		2.27107e-133	1.2762e-64
Solyc07g005570.3	blue	PTHR10388//PTHR10388:SF15 - EUKARYOTIC TRANSLATION INITIATION FACTOR SUI1 // APO PROTEIN 2, CHLOROPLASTIC			0.00180069	0.000567336		0.000987546	0.0236429
Solyc07g006040.3	blue				1.02766e-57	2.65451e-56		4.4968e-57	3.45539e-51
Solyc07g006580.3	blue	K00901 - diacylglycerol kinase (ATP) (dgkA, DGK)			3.99485e-07	3.34565e-06		7.95605e-06	1.78705e-06
Solyc07g006670.1	blue	2.3.1.160 - Vinorine synthase			0.0165181	0.0421911
Solyc07g006680.1	blue	2.3.1.160 - Vinorine synthase			2.77834e-16	1.74586e-17		1.9371e-13	2.50456e-14
Solyc07g006690.3	blue	PTHR12482:SF17 - ALPHA/BETA-HYDROLASES SUPERFAMILY PROTEIN			0.00770718	0.0188285			0.0416292
Solyc07g006710.2	blue				9.47572e-23	1.18857e-20		2.81259e-18	3.82833e-21
Solyc07g006890.1	blue	K13407 - fatty acid omega-hydroxylase (CYP94A1)			0.000436405	0.00375042		0.0416926	0.00712831
Solyc07g007200.3	blue	PTHR14155//PTHR14155:SF158 - RING FINGER DOMAIN-CONTAINING // SUBFAMILY NOT NAMED			2.02431e-07	1.19589e-05		0.000275181	1.70683e-06
Solyc07g007260.3	blue	PF02977 - Carboxypeptidase A inhibitor (CarbpepA_inh)			4.79629e-20	4.1186e-18		3.4865e-17	1.85965e-19
Solyc07g007270.3	blue				0.000378577	0.0130497			0.00684726
Solyc07g007310.3	blue	PTHR10108:SF701 - METHYLTRANSFERASE TYPE 11 DOMAIN-CONTAINING PROTEIN-RELATED							0.01617
Solyc07g007610.2	blue	PF00097 - Zinc finger, C3HC4 type (RING finger) (zf-C3HC4)			0.0192251
Solyc07g007790.3	blue	PTHR12526:SF343 - SUCROSE-PHOSPHATE SYNTHASE 1-RELATED			0.00141644	0.00505404		0.0245636	0.00311227
Solyc07g007800.3	blue	PTHR20855//PTHR20855:SF32 - ADIPOR/PROGESTIN RECEPTOR-RELATED // SUBFAMILY NOT NAMED			0.0371836			0.0205632	0.0256713
Solyc07g008180.3	blue	PTHR31675//PTHR31675:SF6 - FAMILY NOT NAMED // AXIAL REGULATOR YABBY 5			0.000674912	0.00403978			0.0102639
Solyc07g008570.3	blue	PTHR22953//PTHR22953:SF30 - ACID PHOSPHATASE RELATED // SUBFAMILY NOT NAMED			5.14324e-06	3.97968e-06		0.000124342	2.64393e-05
Solyc07g008840.3	blue	K18469 - TBC1 domain family member 5 (TBC1D5)			5.76145e-07	4.59759e-05		6.34569e-05	6.26283e-06
Solyc07g009230.3	blue	PTHR33147//PTHR33147:SF4 - FAMILY NOT NAMED // DEFENSIN-LIKE PROTEIN 13-RELATED				0.00193019		0.0100933	0.0385924
Solyc07g009290.3	blue	PTHR33147//PTHR33147:SF4 - FAMILY NOT NAMED // DEFENSIN-LIKE PROTEIN 13-RELATED				0.0204218		0.0295755	0.0291806
Solyc07g009380.3	blue	PTHR31062//PTHR31062:SF20 - FAMILY NOT NAMED // XYLOGLUCAN ENDOTRANSGLUCOSYLASE/HYDROLASE PROTEIN 14-RELATED			1.16167e-14	2.07103e-15		8.62338e-23	2.04104e-20
Solyc07g009470.2	blue	PTHR11937//PTHR11937:SF237 - ACTIN // SUBFAMILY NOT NAMED			0.0449659
Solyc07g014680.3	blue	PF02386 - Cation transport protein (TrkH)			1.37582e-10	3.87659e-11		4.4096e-08	4.63274e-08
Solyc07g014740.3	blue	K14347 - solute carrier family 10 (sodium/bile acid cotransporter), member 7 (SLC10A7, P7)			0.00980265	2.23279e-05		0.000757124
Solyc07g017430.3	blue	PTHR11200//PTHR11200:SF122 - INOSITOL 5-PHOSPHATASE // PHOSPHOINOSITIDE PHOSPHATASE SAC3-RELATED			5.60594e-08	6.51451e-07		2.39871e-06	9.1648e-08
Solyc07g017800.3	blue	PF07466 - Protein of unknown function (DUF1517) (DUF1517)			1.64524e-17	1.72964e-19		2.76632e-24	9.98306e-21
Solyc07g018140.3	blue	K04730 - interleukin-1 receptor-associated kinase 1 (IRAK1)			0.00721703	0.0131753		0.0366144	0.009352
Solyc07g019460.3	blue	PTHR19384//PTHR19384:SF79 - FLAVODOXIN-RELATED // SUBFAMILY NOT NAMED			3.01465e-63	1.50802e-62		4.20848e-142	3.20112e-112
Solyc07g021380.1	blue	PF00430 - ATP synthase B/B' CF(0) (ATP-synt_B)			0.000125571	4.36704e-05		0.00577501	0.0044844
Solyc07g022910.3	blue	PTHR32054:SF2 - PROTEIN WEAK CHLOROPLAST MOVEMENT UNDER BLUE LIGHT 1-RELATED			0.029418
Solyc07g025140.3	blue	KOG0286//KOG0645 - G-protein beta subunit // WD40 repeat protein			0.00670283	0.0254245
Solyc07g025490.2	blue				0.0313495	0.0399558
Solyc07g025520.3	blue	PTHR10108//PTHR10108:SF871 - METHYLTRANSFERASE // METHYLTRANSFERASE			3.49577e-15	3.78625e-13		3.83344e-10	8.31138e-14
Solyc07g026675.1	blue	PTHR12374//PTHR12374:SF19 - TRANSCRIPTIONAL ADAPTOR 2 ADA2 -RELATED // SUBFAMILY NOT NAMED			0.00121041	0.016316		0.0382941	0.00100284
Solyc07g032380.3	blue				1.21181e-19	1.88268e-16		6.15599e-17	6.15904e-25
Solyc07g032385.1	blue	K17710 - pentatricopeptide repeat domain-containing protein 1 (PTCD1)			0.0188403
Solyc07g039310.1	blue	PTHR10742//PTHR10742:SF283 - AMINE OXIDASE // SUBFAMILY NOT NAMED			0.000106211	0.00185099		0.0255672	0.00076453
Solyc07g039340.3	blue	2.7.11.1 - Non-specific serine/threonine protein kinase / Threonine-specific protein kinase			5.3925e-05	0.00106804		0.00117441	2.77926e-05
Solyc07g040950.3	blue	5.1.99.1 - Methylmalonyl-CoA epimerase / Methylmalonyl-CoA racemase			1.49453e-24	2.40159e-26		8.51431e-31	3.10578e-25
Solyc07g041920.3	blue	K01366 - cathepsin H (CTSH)			2.23628e-06	4.78147e-06		1.49488e-07	8.48626e-05
Solyc07g042300.1	blue	PTHR21495//PTHR21495:SF71 - NUCLEOPORIN-RELATED // DIRIGENT PROTEIN 1-RELATED			1.38683e-12	1.28342e-11		1.51518e-11	7.66304e-12
Solyc07g042440.3	blue	K03564 - peroxiredoxin Q/BCP (BCP, PRXQ, DOT5)			1.95854e-55	2.89668e-100		9.54683e-97	1.87982e-51
Solyc07g042490.1	blue	PF02519 - Auxin responsive protein (Auxin_inducible)						0.0440992
Solyc07g042560.3	blue	PTHR24115//PTHR24115:SF509 - FAMILY NOT NAMED // KINESIN-LIKE PROTEIN NACK2			0.00460915	0.00303782			0.0324203
Solyc07g043130.3	blue	PTHR32370//PTHR32370:SF17 - FAMILY NOT NAMED // ROOT PHOTOTROPISM PROTEIN 2			2.65457e-109	4.74945e-136		9.14976e-140	8.124e-115
Solyc07g043320.3	blue	PTHR18937//PTHR18937:SF225 - STRUCTURAL MAINTENANCE OF CHROMOSOMES SMC FAMILY MEMBER // SUBFAMILY NOT NAMED			1.06727e-15	1.5519e-65		9.64841e-70	1.08852e-13
Solyc07g043330.2	blue	PTHR31636//PTHR31636:SF35 - FAMILY NOT NAMED // SCARECROW-LIKE PROTEIN 23			0.032048
Solyc07g043570.3	blue	PTHR11732//PTHR11732:SF213 - ALDO/KETO REDUCTASE // SUBFAMILY NOT NAMED			2.86833e-06	7.31484e-05		0.000540429	8.3978e-05
Solyc07g045050.3	blue	1.13.11.27 - 4-hydroxyphenylpyruvate dioxygenase / p-hydroxyphenylpyruvate oxidase			1.92271e-09	3.23269e-09		4.04486e-10	2.91818e-11
Solyc07g045315.1	blue	PTHR13271//PTHR13271:SF44 - UNCHARACTERIZED PUTATIVE METHYLTRANSFERASE // RIBULOSE-1,5-BISPHOSPHATE CARBOXYLASE/OXYGENASE SMALL SUBUNIT N-METHYLTRANSFERASE I-RELATED			5.20219e-13	4.22797e-11		3.42162e-11	1.65582e-11
Solyc07g048080.3	blue	PTHR11451//PTHR11451:SF32 - TRNA SYNTHETASE-RELATED // THREONYL-TRNA SYNTHETASE / THREONINE--TRNA LIGASE-RELATED			2.52288e-12	2.35063e-17		1.54028e-17	5.92124e-10
Solyc07g049290.3	blue	PTHR11654//PTHR11654:SF154 - OLIGOPEPTIDE TRANSPORTER-RELATED // PROTEIN NRT1/ PTR FAMILY 6.4			1.39288e-10	5.30511e-11		1.58488e-10	1.01427e-10
Solyc07g049430.3	blue	PTHR22835//PTHR22835:SF276 - ZINC FINGER FYVE DOMAIN CONTAINING PROTEIN // SUBFAMILY NOT NAMED			0.00129411	0.0104023			0.0187091
Solyc07g049610.1	blue	PTHR11062:SF52 - GLYCOSYLTRANSFERASE 18			0.00229552	0.000132212		0.000128089	0.00347501
Solyc07g049720.3	blue	PTHR10290//PTHR10290:SF3 - DNA TOPOISOMERASE I // DNA TOPOISOMERASE 1			0.0474564
Solyc07g051820.3	blue	PTHR13301//PTHR13301:SF53 - X-BOX TRANSCRIPTION FACTOR-RELATED // CELLULOSE SYNTHASE-LIKE PROTEIN B1-RELATED			1.80598e-67	4.37515e-65		4.94309e-87	3.56289e-91
Solyc07g052290.1	blue	PTHR22939//PTHR22939:SF79 - SERINE PROTEASE FAMILY S1C HTRA-RELATED // PEPTIDASE M50 FAMILY PROTEIN			0.000237148	0.00028456		0.00272985	0.00209092
Solyc07g052320.3	blue	PF02434//PF13334 - Fringe-like (Fringe) // Domain of unknown function (DUF4094) (DUF4094)			2.57919e-07	6.60321e-06		0.000964958	7.26893e-06
Solyc07g052490.3	blue	PTHR10641//PTHR10641:SF657 - MYB-LIKE DNA-BINDING PROTEIN MYB // SUBFAMILY NOT NAMED			0.000466127	0.00669869			0.00867804
Solyc07g052600.3	blue	PTHR34126//PTHR34126:SF1 - FAMILY NOT NAMED // PEROXISOME BIOGENESIS PROTEIN 22					0.0170771	0.0446958
Solyc07g052610.3	blue	PTHR15615:SF20 - CYCLIN FAMILY PROTEIN-RELATED			3.45061e-18	1.78243e-18		1.87672e-20	1.99528e-16
Solyc07g052695.1	blue	PTHR31352//PTHR31352:SF5 - FAMILY NOT NAMED // BETA-AMYLASE 5-RELATED			0.00220782	0.0142063		0.0144224	0.00530876
Solyc07g053130.3	blue	PF00954//PF01453//PF07714//PF08276 - S-locus glycoprotein domain (S_locus_glycop) // D-mannose binding lectin (B_lectin) // Protein tyrosine kinase (Pkinase_Tyr) // PAN-like domain (PAN_2)			2.22946e-05	0.00057024		0.0222203	0.000698829
Solyc07g053180.3	blue	PTHR24365:SF368 - OUTER ARM DYNEIN LIGHT CHAIN 1 PROTEIN			2.02174e-19	1.15842e-16		8.64194e-16	1.55112e-20
Solyc07g053410.3	blue	PTHR31072:SF3 - TRANSCRIPTION FACTOR TCP10-RELATED			0.0315666
Solyc07g053450.3	blue	PTHR13301//PTHR13301:SF69 - X-BOX TRANSCRIPTION FACTOR-RELATED // BASIC HELIX-LOOP-HELIX DOMAIN-CONTAINING PROTEIN			3.67977e-06	0.000119473		0.0124375	0.000128501
Solyc07g053890.3	blue	PF03007//PF06974 - Wax ester synthase-like Acyl-CoA acyltransferase domain (WES_acyltransf) // Protein of unknown function (DUF1298) (DUF1298)			0.0286491
Solyc07g054060.3	blue				0.00283087	0.0139397			0.0210277
Solyc07g054180.3	blue	PTHR10639//PTHR10639:SF8 - CLATHRIN LIGHT CHAIN // SUBFAMILY NOT NAMED				0.00890905	0.0497498
Solyc07g054470.1	blue				2.60598e-06	9.24658e-05		2.5201e-09	2.7914e-13
Solyc07g054540.3	blue	K03644 - lipoic acid synthetase (lipA)			3.04419e-11	1.0203e-09		2.23334e-12	4.6542e-12
Solyc07g054810.1	blue				3.94872e-06	2.71012e-06		0.000700248	8.23462e-05
Solyc07g055260.3	blue	PTHR24078//PTHR24078:SF207 - DNAJ HOMOLOG SUBFAMILY C MEMBER // PROTEIN DNJ-19			7.74136e-18	1.39913e-16		3.47043e-17	4.20898e-19
Solyc07g055320.3	blue	PTHR23076//PTHR23076:SF60 - METALLOPROTEASE M41 FTSH // SUBFAMILY NOT NAMED			2.36118e-24	4.68613e-35		1.24593e-60	4.18164e-24
Solyc07g055560.3	blue	PF00067//PF01453//PF07714 - Cytochrome P450 (p450) // D-mannose binding lectin (B_lectin) // Protein tyrosine kinase (Pkinase_Tyr)			3.37319e-11	6.26645e-13		2.0924e-16	4.79877e-13
Solyc07g055930.3	blue	PTHR32116//PTHR32116:SF30 - FAMILY NOT NAMED // GALACTURONOSYLTRANSFERASE 15-RELATED			2.16291e-05	0.000440569		0.0168187	0.000456018
Solyc07g056000.3	blue					0.00440781		0.0327243
Solyc07g056140.3	blue	PTHR22572//PTHR22572:SF101 - SUGAR-1-PHOSPHATE GUANYL TRANSFERASE // GLUCOSE-1-PHOSPHATE ADENYLYLTRANSFERASE SMALL SUBUNIT, CHLOROPLASTIC			1.75341e-13	2.01523e-22		8.33115e-18	2.5191e-11
Solyc07g056360.1	blue	PTHR33124//PTHR33124:SF3 - FAMILY NOT NAMED // EXPRESSED PROTEIN					0.00569722	0.000686423
Solyc07g061790.3	blue	PTHR11220:SF25 - F3F9.4			7.92172e-30	8.94847e-32		3.35908e-31	1.31582e-26
Solyc07g061940.3	blue	K01652 - acetolactate synthase I/II/III large subunit (E2.2.1.6L, ilvB, ilvG, ilvI)			6.34156e-07	7.57668e-06		2.84923e-07	2.05213e-05
Solyc07g061990.3	blue	2.5.1.90 - All-trans-octaprenyl-diphosphate synthase / Trans-prenyltransferase			1.91296e-29	8.17686e-28		4.68549e-31	2.43902e-31
Solyc07g062080.3	blue	PTHR24055//PTHR24055:SF200 - MITOGEN-ACTIVATED PROTEIN KINASE // MITOGEN-ACTIVATED PROTEIN KINASE 18-RELATED			0.000108904	7.33059e-05		3.27541e-05	0.00129232
Solyc07g062300.3	blue	PTHR13833//PTHR13833:SF46 - FAMILY NOT NAMED // NHL DOMAIN-CONTAINING PROTEIN			0.000177042	0.000276065		0.00560471	0.00399379
Solyc07g063120.3	blue	KOG0296//KOG0316//KOG1332 - Angio-associated migratory cell protein (contains WD40 repeats) // Conserved WD40 repeat-containing protein // Vesicle coat complex COPII, subunit SEC13			4.24388e-87	9.15137e-133		5.77018e-134	8.46394e-84
Solyc07g063430.3	blue	PTHR11266:SF16 - PEROXISOMAL MEMBRANE (MPV17/PMP22) FAMILY PROTEIN			9.20643e-26	8.85849e-36		1.11066e-35	4.57543e-25
Solyc07g063610.3	blue	PTHR11886:SF22 - DYNEIN LIGHT CHAIN TYPE 1 FAMILY PROTEIN			5.79055e-12	2.92436e-10		6.42448e-10	5.462e-10
Solyc07g063905.1	blue				3.84918e-06	1.22638e-06		2.47206e-11	3.0342e-10
Solyc07g063940.2	blue	PF03514 - GRAS domain family (GRAS)			1.0887e-05	9.65611e-05		0.00089878	6.19796e-05
Solyc07g064030.3	blue	PTHR24115:SF520 - KINESIN-2-RELATED						0.0068216
Solyc07g064040.3	blue	PTHR23042//PTHR23042:SF67 - CIRCADIAN PROTEIN CLOCK/ARNT/BMAL/PAS // TRANSCRIPTION FACTOR ILR3-RELATED			0.000322987	0.000822629		4.79052e-05	8.67423e-06
Solyc07g064240.3	blue	PF02298 - Plastocyanin-like domain (Cu_bind_like)				0.014361		0.00300179
Solyc07g064410.1	blue	PTHR24067//PTHR24067:SF41 - UBIQUITIN-CONJUGATING ENZYME E2 // AKT-INTERACTING PROTEIN			7.23732e-115	8.15363e-112		9.06156e-140	1.02499e-143
Solyc07g064420.3	blue				5.47453e-10	3.45621e-08		4.56677e-10	6.34811e-13
Solyc07g064620.2	blue	PTHR10388//PTHR10388:SF16 - EUKARYOTIC TRANSLATION INITIATION FACTOR SUI1 // SUBFAMILY NOT NAMED			3.1064e-15	1.80007e-18		9.82196e-15	6.55508e-13
Solyc07g064870.3	blue	PTHR22298:SF23 - GLYCOSYL HYDROLASE FAMILY 9 PROTEIN			9.93299e-05	0.000289365		0.0198693	0.00118156
Solyc07g065380.3	blue				0.00191031	0.000695786		0.00422465	0.0144842
Solyc07g065900.3	blue	PTHR11627//PTHR11627:SF19 - FRUCTOSE-BISPHOSPHATE ALDOLASE // FRUCTOSE-BISPHOSPHATE ALDOLASE-RELATED			1.50855e-79	1.93426e-101		1.43608e-113	3.11522e-84
Solyc07g066310.3	blue	PTHR34369//PTHR34369:SF2 - FAMILY NOT NAMED // PHOTOSYSTEM II 10 KDA POLYPEPTIDE, CHLOROPLASTIC			1.48155e-12	7.54758e-21		1.42035e-20	3.89926e-11
Solyc08g005010.3	blue	PF02517 - CAAX protease self-immunity (Abi)			1.72217e-06	6.06668e-08		1.12062e-06	1.10039e-05
Solyc08g005070.3	blue	K12493 - ADP-ribosylation factor GTPase-activating protein 2/3 (ARFGAP2_3)			0.045474			0.0195791	0.000435992
Solyc08g005100.3	blue	PTHR31065:SF2 - PLATZ TRANSCRIPTION FACTOR DOMAIN-CONTAINING PROTEIN			4.759e-14	1.28836e-11		1.60557e-13	5.22258e-17
Solyc08g005220.3	blue	PTHR31906:SF5 - PLASTID-LIPID-ASSOCIATED PROTEIN 3, CHLOROPLASTIC-RELATED			1.20524e-05	7.75348e-08		1.96596e-07	1.4696e-05
Solyc08g005630.3	blue	K17756 - long-chain-alcohol oxidase (FAO3)			0.0201616	0.0223998		0.0236194
Solyc08g005880.3	blue	PTHR11206//PTHR11206:SF102 - MULTIDRUG RESISTANCE PROTEIN // MATE EFFLUX FAMILY PROTEIN			1.94838e-05	1.11003e-10		1.45165e-09	0.000207183
Solyc08g005930.1	blue	PTHR24412:SF217 - F-BOX/KELCH-REPEAT PROTEIN SKIP25			8.71062e-15	3.96895e-13		1.23904e-10	7.86299e-12
Solyc08g006160.3	blue	PF04755 - PAP_fibrillin (PAP_fibrillin)			1.10318e-16	8.00988e-34		5.57704e-36	1.15733e-14
Solyc08g006510.3	blue	PTHR12126//PTHR12126:SF8 - NADH-UBIQUINONE OXIDOREDUCTASE 39 KDA SUBUNIT-RELATED // NAD(P)-BINDING ROSSMANN-FOLD SUPERFAMILY PROTEIN			0.000142681	0.00187317		0.0164622	0.000557467
Solyc08g006530.3	blue	PTHR31319//PTHR31319:SF10 - FAMILY NOT NAMED // ZINC FINGER PROTEIN CONSTANS-RELATED			7.05114e-05	3.76663e-05		1.80558e-08	1.51892e-05
Solyc08g006580.3	blue				0.000536864	0.00333236		0.00435226	0.000458611
Solyc08g006970.3	blue	PTHR23155//PTHR23155:SF501 - LEUCINE-RICH REPEAT-CONTAINING PROTEIN // SUBFAMILY NOT NAMED			0.00749848	0.027596		0.00681558	0.00241299
Solyc08g006990.2	blue	PTHR31086:SF2 - ALUMINUM-ACTIVATED MALATE TRANSPORTER 12-RELATED			1.71418e-10	2.9593e-10		7.8757e-14	1.09631e-08
Solyc08g007030.3	blue	PTHR13527:SF0 - SAYSVFN DOMAIN-CONTAINING PROTEIN 1			0.0292243
Solyc08g007130.3	blue	K01177 - beta-amylase (E3.2.1.2)			5.56871e-92	1.02582e-90		3.88892e-79	1.86069e-89
Solyc08g007250.2	blue	PTHR23155:SF442 - PH DOMAIN LEUCINE-RICH REPEAT-CONTAINING PROTEIN PHOSPHATASE 2			0.00658876	0.00573713		0.0445357	0.0246355
Solyc08g007510.3	blue	PTHR12290:SF18 - PROTEIN CORNICHON HOMOLOG 3-RELATED			1.82098e-08	2.50625e-07		1.15526e-06	1.06726e-07
Solyc08g008070.1	blue	PTHR14499:SF11 - PROTEIN VM106R.1						0.000314823
Solyc08g008080.1	blue	PTHR14155:SF175 - E3 UBIQUITIN-PROTEIN LIGASE RHA2B-RELATED			7.0104e-05	0.000293789		0.00437093	0.000114702
Solyc08g008087.1	blue	PTHR11751//PTHR11751:SF380 - SUBGROUP I AMINOTRANSFERASE RELATED // 1-AMINOCYCLOPROPANE-1-CARBOXYLATE SYNTHASE 2-RELATED			0.00245526	0.00592565			0.035296
Solyc08g008480.2	blue				1.32621e-05	2.96565e-05		0.000225082	0.000268184
Solyc08g008630.3	blue	5.2.1.14 - Beta-carotene isomerase			1.16093e-13	7.82599e-15		1.98913e-12	9.43489e-13
Solyc08g013740.3	blue	PTHR10108//PTHR10108:SF801 - METHYLTRANSFERASE // METHYLTRANSFERASE PMT18-RELATED			0.0152146	0.0429638			0.0298685
Solyc08g013840.3	blue	PTHR18901//PTHR18901:SF2 - 2-DEOXYGLUCOSE-6-PHOSPHATE PHOSPHATASE 2 // GLYCEROL-1-PHOSPHATE PHOSPHOHYDROLASE 1-RELATED			2.87697e-11	5.29299e-12		4.16431e-09	5.55413e-09
Solyc08g014450.3	blue	PTHR23257//PTHR23257:SF378 - SERINE-THREONINE PROTEIN KINASE // INTEGRIN-LINKED PROTEIN KINASE FAMILY PROTEIN-RELATED			3.35239e-06	8.62633e-05		1.80336e-08	4.51562e-10
Solyc08g016080.3	blue	PTHR10366//PTHR10366:SF343 - NAD DEPENDENT EPIMERASE/DEHYDRATASE // SUBFAMILY NOT NAMED			1.9681e-56	2.88981e-73		8.6787e-65	1.1516e-52
Solyc08g022030.3	blue	PTHR23160:SF7 - MYOSIN HEAVY CHAIN-RELATED PROTEIN			7.08738e-10	2.55302e-08		3.83502e-08	1.95531e-12
Solyc08g029110.3	blue	K06990 - uncharacterized protein (K06990)							0.0134145
Solyc08g041820.3	blue	PTHR11850:SF95 - HOMEOBOX PROTEIN KNOTTED-1-LIKE 5			0.00338036	0.00033392		0.000403097	0.0250203
Solyc08g042000.3	blue	PTHR12526:SF343 - SUCROSE-PHOSPHATE SYNTHASE 1-RELATED			0.00482509	0.0169804			0.0336832
Solyc08g059760.3	blue	PTHR31356//PTHR31356:SF4 - FAMILY NOT NAMED // L-ASCORBATE PEROXIDASE 6-RELATED			0.000133528	0.00211477		0.000368807	3.68354e-05
Solyc08g061778.1	blue				9.85425e-15	2.97574e-12		1.30556e-13	1.98023e-12
Solyc08g065220.3	blue	1.4.4.2 - Glycine dehydrogenase (aminomethyl-transferring) / Glycine-cleavage complex P-protein			6.28562e-58	2.1306e-56		8.66787e-204	4.58522e-126
Solyc08g065420.3	blue	PTHR11850:SF92 - HOMEOBOX PROTEIN ATH1			0.00603486	0.00110796		0.00246628	0.0460754
Solyc08g066050.3	blue	K08850 - aurora kinase, other [EC:2.7.11.1] (AURKX)			0.00332488	0.0256551			0.0480289
Solyc08g066420.1	blue	PF10604 - Polyketide cyclase / dehydrase and lipid transport (Polyketide_cyc2)			2.04659e-08	9.14409e-09		1.40381e-07	4.78578e-08
Solyc08g066650.3	blue	1.13.11.69//1.13.11.70 - Carlactone synthase // All-trans-10'-apo-beta-carotenal 13,14-cleaving dioxygenase / Carotenoid cleavage dioxygenase 8			0.0232357	0.0392388		0.0430086
Solyc08g066800.3	blue	PTHR18896//PTHR18896:SF63 - PHOSPHOLIPASE D // SUBFAMILY NOT NAMED			0.0408637
Solyc08g067250.3	blue	PTHR23240//PTHR23240:SF10 - DNA CROSS-LINK REPAIR PROTEIN PSO2/SNM1-RELATED // SUBFAMILY NOT NAMED			7.56069e-05	0.00276285		0.000513989	0.000145813
Solyc08g067260.3	blue	PTHR31561//PTHR31561:SF2 - FAMILY NOT NAMED // 3-KETOACYL-COA SYNTHASE 10			3.66438e-06	0.000127933		0.00102875	0.000135036
Solyc08g067270.3	blue				0.0240332
Solyc08g067500.2	blue				0.0156611	5.87587e-06		1.79246e-06	0.00640432
Solyc08g068080.3	blue				0.0414226	0.000566176		0.00255074
Solyc08g068590.3	blue	PF04755 - PAP_fibrillin (PAP_fibrillin)			5.11145e-06	6.82339e-05		0.00170585	0.000105842
Solyc08g074260.3	blue	1.14.13.121 - Premnaspirodiene oxygenase / Hyoscymus muticus premnaspirodiene oxygenase			0.0258696
Solyc08g074960.3	blue	PTHR21576:SF7 - MAJOR FACILITATOR PROTEIN-RELATED			1.40583e-09	2.37561e-07		1.90022e-05	1.60847e-08
Solyc08g075020.3	blue	PTHR21562//PTHR21562:SF13 - NOTUM-RELATED // SUBFAMILY NOT NAMED			1.43476e-08	1.02277e-07		1.76194e-06	8.5579e-09
Solyc08g075100.3	blue	PF07082 - Protein of unknown function (DUF1350) (DUF1350)			0.0428803	0.025853		0.0319565	0.0241401
Solyc08g075210.2	blue	2.3.1.107 - Deacetylvindoline O-acetyltransferase / Deacetylvindoline acetyltransferase			1.37301e-22	1.64079e-20		4.00247e-31	1.74992e-27
Solyc08g075450.3	blue	PF00892 - EamA-like transporter family (EamA)			4.00832e-23	9.2469e-20		8.13583e-17	6.78544e-21
Solyc08g075860.3	blue				1.81573e-05	0.000161629		0.000789806	0.00053219
Solyc08g075990.3	blue	PF09353 - Domain of unknown function (DUF1995) (DUF1995)			1.2751e-11	1.93922e-09		2.08172e-09	1.23853e-09
Solyc08g076150.3	blue	PF01535//PF13041//PF14432 - PPR repeat (PPR) // PPR repeat family (PPR_2) // DYW family of nucleic acid deaminases (DYW_deaminase)			6.94081e-10	1.79488e-09		5.05487e-08	1.53784e-09
Solyc08g076220.3	blue	2.7.1.19 - Phosphoribulokinase / Phosphopentokinase			5.34701e-26	1.09021e-41		1.68541e-49	4.92094e-27
Solyc08g076720.3	blue	PTHR24221:SF138 - LP14331P-RELATED			0.00177817	0.00200956			0.0116483
Solyc08g076740.3	blue				5.18804e-20	5.47133e-18		1.71965e-17	1.657e-21
Solyc08g076970.3	blue	3.5.1.16 - Acetylornithine deacetylase / N-acetylornithinase			0.00116971	0.00447334		0.00059548	0.000436175
Solyc08g077170.3	blue	PTHR11654:SF121 - PROTEIN NRT1/ PTR FAMILY 7.3			6.51445e-05	0.000372271		0.0159072	0.000900792
Solyc08g077180.3	blue	PTHR11817:SF26 - PLASTIDIAL PYRUVATE KINASE 3, CHLOROPLASTIC			0.00584771	0.042427
Solyc08g077220.3	blue	PTHR19282//PTHR19282:SF262 - TETRASPANIN // SUBFAMILY NOT NAMED			2.80106e-08	8.62853e-09		4.22418e-07	6.24566e-07
Solyc08g077910.3	blue	PTHR31692:SF10 - EXPANSIN-LIKE B1	0.0443724			1.12182e-05		2.18011e-05
Solyc08g078230.3	blue	PTHR33977:SF1 - ZINC ION BINDING PROTEIN			0.0112829	0.0289558
Solyc08g079005.1	blue					0.0350453	0.0429686	0.0334357
Solyc08g079180.3	blue	K02355 - elongation factor G (fusA, GFM, EFG)			0.000366371	0.00156478		0.0104629	0.00100171
Solyc08g079600.3	blue				0.00526138			0.0278106	0.00146346
Solyc08g079750.3	blue	K14270 - aminotransferase (ACS10_12)			1.36578e-25	7.01678e-22		7.4677e-17	8.02221e-23
Solyc08g080050.3	blue	PTHR31032//PTHR31032:SF1 - FAMILY NOT NAMED // PGR5-LIKE PROTEIN 1A, CHLOROPLASTIC-RELATED			3.38087e-30	1.86228e-31		9.91933e-83	7.13064e-60
Solyc08g080200.3	blue	PF00732//PF03105//PF05199//PF07690 - GMC oxidoreductase (GMC_oxred_N) // SPX domain (SPX) // GMC oxidoreductase (GMC_oxred_C) // Major Facilitator Superfamily (MFS_1)			1.21416e-12	1.2693e-11		7.20548e-09	1.53686e-11
Solyc08g081030.1	blue	PTHR18901//PTHR18901:SF4 - 2-DEOXYGLUCOSE-6-PHOSPHATE PHOSPHATASE 2 // SUBFAMILY NOT NAMED			7.17803e-05	0.00016515		1.35836e-05	0.00102176
Solyc08g081180.3	blue	K09597 - signal peptide peptidase-like 2B [EC:3.4.23.-] (SPPL2B)			0.000335596	0.00150774		0.0189853	0.00243844
Solyc08g081190.3	blue	PTHR19139//PTHR19139:SF169 - AQUAPORIN TRANSPORTER // AQUAPORIN PIP1-4-RELATED			2.47039e-06	2.11364e-11		7.09317e-15	3.33843e-07
Solyc08g081195.1	blue				2.09216e-36	3.98607e-39		1.05838e-79	2.49621e-50
Solyc08g081340.3	blue	K10843 - DNA excision repair protein ERCC-3 (ERCC3, XPB)			0.0491933
Solyc08g081750.3	blue	PTHR10794:SF58 - CAAX AMINO TERMINAL PROTEASE FAMILY PROTEIN				0.0231734
Solyc08g081810.3	blue	PF00999 - Sodium/hydrogen exchanger family (Na_H_Exchanger)			0.00971013
Solyc08g081990.3	blue	K16240 - protein suppressor of PHYA-105 1 (SPA1)			0.000214997	2.81845e-05		0.000128915	0.000109134
Solyc08g082345.1	blue				0.00010267	0.000450914		0.00125963	0.00120666
Solyc08g082390.3	blue				1.44515e-15	3.31321e-15		2.52221e-23	8.10888e-24
Solyc08g082590.3	blue	PTHR10168:SF61 - F1N19.7			1.06812e-77	4.39973e-188		1.39139e-180	1.32561e-73
Solyc08g082870.3	blue	PTHR24320:SF81 - NAD(P)-BINDING ROSSMANN-FOLD SUPERFAMILY PROTEIN				0.0457272
Solyc08g083190.3	blue	3.7.1.9 - 2-hydroxymuconate-6-semialdehyde hydrolase / 2-hydroxymuconate-semialdehyde hydrolase			1.03314e-25	1.88778e-22		2.01376e-18	4.28752e-25
Solyc08g083320.3	blue	2.4.1.242 - NDP-glucose--starch glucosyltransferase / Waxy protein			2.28134e-17	6.17829e-17		4.43136e-13	7.76223e-15
Solyc08g083360.3	blue	PTHR23426//PTHR23426:SF27 - FERREDOXIN/ADRENODOXIN // SUBFAMILY NOT NAMED			1.19145e-56	3.9677e-56		1.52394e-84	4.25699e-60
Solyc09g005230.3	blue	KOG4249 - Uncharacterized conserved protein			0.0328656
Solyc09g005650.1	blue	PF04937//PF05699 - Protein of unknown function (DUF 659) (DUF659) // hAT family C-terminal dimerisation region (Dimer_Tnp_hAT)			0.00017667	0.00286301			0.00436047
Solyc09g007200.3	blue	PF01535//PF13041 - PPR repeat (PPR) // PPR repeat family (PPR_2)			0.00424057	0.0183678			0.0289062
Solyc09g007470.1	blue	PTHR33448//PTHR33448:SF4 - FAMILY NOT NAMED // ARABIDOPSIS THALIANA GENOMIC DNA, CHROMOSOME 5, P1 CLONE:MOK16-RELATED			0.0225907				0.0334222
Solyc09g007480.3	blue				0.00761335	0.000131648		0.000153403	0.0170431
Solyc09g007710.3	blue	PTHR11017//PTHR11017:SF163 - LEUCINE-RICH REPEAT-CONTAINING PROTEIN // SUBFAMILY NOT NAMED			6.41792e-08	6.40622e-07		3.31954e-08	6.48547e-11
Solyc09g007760.3	blue	PTHR19139//PTHR19139:SF153 - AQUAPORIN TRANSPORTER // AQUAPORIN PIP1-1-RELATED			6.87273e-99	4.48724e-96		5.51299e-231	3.2361e-190
Solyc09g007765.1	blue	PTHR19139//PTHR19139:SF153 - AQUAPORIN TRANSPORTER // AQUAPORIN PIP1-1-RELATED			4.89166e-55	2.46094e-55		1.18089e-171	3.19859e-95
Solyc09g007910.3	blue	K10775 - phenylalanine ammonia-lyase (E4.3.1.24)			2.76994e-29	9.80362e-65		8.46691e-71	7.42091e-29
Solyc09g008550.3	blue	K03457 - nucleobase:cation symporter-1, NCS1 family (TC.NCS1)			1.41437e-08	3.44251e-08		1.55943e-07	6.45374e-09
Solyc09g008860.3	blue	2.7.11.1 - Non-specific serine/threonine protein kinase / Threonine-specific protein kinase						0.00648392
Solyc09g009170.3	blue	PTHR24032:SF1 - PRESPORE PROTEIN DP87			0.000105744	0.00208456		0.00899824	0.000481031
Solyc09g009420.1	blue				5.73838e-12	2.07172e-19		1.78542e-21	6.92979e-10
Solyc09g009590.1	blue	PTHR10634 - AN1-TYPE ZINC FINGER PROTEIN			0.0387252	0.0131998
Solyc09g009660.3	blue	K15287 - solute carrier family 35, member F1/2 (SLC35F1_2)			2.42843e-06	1.19048e-06		0.00044849	0.000105101
Solyc09g009720.1	blue	PTHR24067:SF104 - UBIQUITIN-CONJUGATING ENZYME E2 14						0.0276153	0.0344958
Solyc09g009820.3	blue	PTHR11260:SF166 - GLUTATHIONE S-TRANSFERASE D2-RELATED			0.00263248	0.00153652		0.0316738	0.014767
Solyc09g009990.3	blue				0.00659032	0.00497229		0.00934223	0.0146051
Solyc09g010380.3	blue	PTHR10286//PTHR10286:SF13 - INORGANIC PYROPHOSPHATASE // INORGANIC PYROPHOSPHATASE-LIKE PROTEIN			0.00212067	0.00370846		0.0405497	0.0122224
Solyc09g010510.3	blue	PTHR24320:SF81 - NAD(P)-BINDING ROSSMANN-FOLD SUPERFAMILY PROTEIN			0.000261232	0.0012166		0.0300597	0.00520676
Solyc09g010530.3	blue	PTHR32468:SF10 - CATION/H(+) ANTIPORTER 20			0.00952359	0.00428234
Solyc09g010840.1	blue	PTHR10641:SF457 - TRANSCRIPTION FACTOR AS1			1.20524e-05	0.000223902		0.00155359	2.66271e-05
Solyc09g011040.1	blue	PTHR13683//PTHR13683:SF347 - ASPARTYL PROTEASES // CYSTEINE-RICH PEPTIDE FAMILY PROTEIN			0.0112341	0.0380904		0.00950987	0.00936779
Solyc09g011080.3	blue	KOG0651 - 26S proteasome regulatory complex, ATPase RPT4			1.35922e-106	9.17582e-143		2.39537e-178	3.02854e-122
Solyc09g011130.2	blue				4.46444e-25	3.35591e-36		4.46622e-42	6.99861e-25
Solyc09g011490.3	blue	PTHR11260//PTHR11260:SF309 - GLUTATHIONE S-TRANSFERASE, GST, SUPERFAMILY, GST DOMAIN CONTAINING // SUBFAMILY NOT NAMED			0.00606244			0.0356824	0.00623924
Solyc09g014215.1	blue				0.0112531
Solyc09g014350.3	blue	PTHR15486//PTHR15486:SF20 - ANCIENT UBIQUITOUS PROTEIN // GLYCEROL-3-PHOSPHATE 2-O-ACYLTRANSFERASE 6			1.87229e-22	2.2151e-22		1.03379e-22	1.86756e-20
Solyc09g014400.3	blue	3.2.1.3 - Glucan 1,4-alpha-glucosidase / Lysosomal alpha-glucosidase			1.099e-13	1.41737e-11		2.63431e-12	2.60998e-14
Solyc09g015360.3	blue	PTHR24078 - DNAJ HOMOLOG SUBFAMILY C MEMBER			3.36178e-05	0.000445773		8.00307e-05	0.000174684
Solyc09g018440.2	blue	PTHR13234//PTHR13234:SF21 - GAMMA-INTERFERON INDUCIBLE LYSOSOMAL THIOL REDUCTASE GILT // SUBFAMILY NOT NAMED			0.000258983	0.00335103		0.0477011	0.00630845
Solyc09g018490.3	blue	PTHR32444//PTHR32444:SF6 - FAMILY NOT NAMED // D-MANNOSE BINDING LECTIN PROTEIN WITH APPLE-LIKE CARBOHYDRATE-BINDING DOMAIN						0.0181368	0.021508
Solyc09g018500.2	blue				0.00311984	0.0136268		0.0221311	0.00519152
Solyc09g018510.3	blue	K15892 - farnesol kinase (FOLK)			9.66754e-08	4.72193e-06		9.87619e-07	2.97062e-06
Solyc09g020110.3	blue	PTHR11240//PTHR11240:SF16 - RIBONUCLEASE T2 // RIBONUCLEASE 2			0.000741195	0.00744736		0.0402096	0.00218831
Solyc09g031975.1	blue				0.00980994	0.0247272
Solyc09g056010.1	blue				0.00893528	0.000522502		0.0101726	0.0472112
Solyc09g058980.3	blue				0.000160716	0.00169059		0.0254651	0.00100353
Solyc09g059170.2	blue	PTHR11926//PTHR11926:SF359 - GLUCOSYL/GLUCURONOSYL TRANSFERASES // SUBFAMILY NOT NAMED			0.000619051	0.0023347		0.00448011	0.000961852
Solyc09g059510.3	blue	PF00847 - AP2 domain (AP2)			8.08099e-12	9.59625e-17		3.8655e-11	2.80004e-09
Solyc09g059970.3	blue	K12160 - small ubiquitin-related modifier (SUMO, SMT3)			4.57005e-10	4.22852e-09		9.30154e-07	3.16521e-08
Solyc09g061730.2	blue					0.0498452
Solyc09g064240.3	blue	2.7.1.3 - Ketohexokinase / Hepatic fructokinase			2.26527e-05	0.000419367		0.000400085	6.24897e-06
Solyc09g065160.3	blue				0.0316455	0.0493034
Solyc09g065210.3	blue	PTHR23315//PTHR23315:SF84 - BETA CATENIN-RELATED ARMADILLO REPEAT-CONTAINING // ANKYRIN AND ARMADILLO REPEAT-CONTAINING PROTEIN			0.0095026
Solyc09g065370.2	blue				0.000124728	0.000905407		5.21594e-06	4.22701e-06
Solyc09g065560.3	blue	PTHR11814//PTHR11814:SF60 - SULFATE TRANSPORTER // SULFATE TRANSPORTER 3.1-RELATED			2.20668e-05	1.04036e-05		6.57371e-05	0.000404393
Solyc09g065660.3	blue	PTHR10015//PTHR10015:SF160 - HEAT SHOCK TRANSCRIPTION FACTOR // SUBFAMILY NOT NAMED				0.0150952
Solyc09g065900.3	blue	PTHR22912:SF135 - GLUTATHIONE REDUCTASE, CHLOROPLASTIC			8.58116e-15	8.57651e-18		2.52103e-12	3.62101e-12
Solyc09g066470.3	blue	PTHR12847:SF6 - ABC TRANSPORTER I FAMILY MEMBER 19-RELATED			4.52828e-07	5.11107e-07		6.97023e-05	5.36221e-06
Solyc09g072800.3	blue				0.000264112	1.34658e-07		0.00017871	0.00490301
Solyc09g072860.2	blue	PF11107 - Fanconi anemia group F protein (FANCF) (FANCF)			0.00023189	0.00473447		0.0386865	0.00217128
Solyc09g072980.2	blue	K10523 - speckle-type POZ protein (SPOP)			4.92494e-07	1.97467e-05		2.94582e-05	8.15684e-07
Solyc09g074450.1	blue	PTHR35725:SF1 - CLASSICAL ARABINOGALACTAN PROTEIN 26			1.16641e-21	4.01445e-19		8.07732e-23	3.39109e-24
Solyc09g074460.2	blue	PTHR22763//PTHR22763:SF62 - RING ZINC FINGER PROTEIN // SUBFAMILY NOT NAMED			0.000286383	0.000358154		0.0175585	0.00378913
Solyc09g075080.3	blue	PTHR31348//PTHR31348:SF4 - FAMILY NOT NAMED // PHYTOCHROME A-ASSOCIATED F-BOX PROTEIN			7.71973e-11	8.57753e-09		7.05613e-09	5.73188e-10
Solyc09g075210.3	blue	PTHR33509:SF5 - LATE EMBRYOGENESIS ABUNDANT 3 (LEA3) FAMILY PROTEIN			5.14056e-36	4.11315e-42		2.55693e-48	1.99138e-35
Solyc09g075360.3	blue	PTHR22298:SF55 - ENDOGLUCANASE 1-RELATED	0.0299883			0.000229748	0.0127692	0.000248114
Solyc09g075490.3	blue	PTHR24089//PTHR24089:SF393 - FAMILY NOT NAMED // NICOTINAMIDE ADENINE DINUCLEOTIDE TRANSPORTER 1, CHLOROPLASTIC			0.00932305	0.00145244
Solyc09g075720.3	blue	PTHR27001//PTHR27001:SF29 - FAMILY NOT NAMED // PROTEIN KINASE FAMILY PROTEIN-RELATED			0.0373233
Solyc09g082370.3	blue	PTHR11200//PTHR11200:SF130 - INOSITOL 5-PHOSPHATASE // SUBFAMILY NOT NAMED				0.0296643
Solyc09g082510.3	blue	KOG0962 - DNA repair protein RAD50, ABC-type ATPase/SMC superfamily			0.000594807	0.00522883			0.00397358
Solyc09g082620.3	blue	PTHR33109//PTHR33109:SF4 - FAMILY NOT NAMED // EPIDERMAL PATTERNING FACTOR-LIKE PROTEIN 5			0.00013985	2.47331e-05		0.000647996	0.00165642
Solyc09g082630.3	blue	PTHR23418//PTHR23418:SF4 - ACIREDUCTONE DIOXYGENASE // 1,2-DIHYDROXY-3-KETO-5-METHYLTHIOPENTENE DIOXYGENASE 4			1.0597e-30	5.99575e-32		5.44128e-37	8.16817e-34
Solyc09g082820.3	blue		0.000434651		0.018705	8.19086e-11	0.00479275	6.38201e-10
Solyc09g082990.3	blue	5.1.3.18 - GDP-mannose 3,5-epimerase			1.84522e-38	2.11074e-36		1.21617e-30	1.81511e-34
Solyc09g083090.3	blue	PTHR24343:SF102 - CBL-INTERACTING SERINE/THREONINE-PROTEIN KINASE 7			0.00154347	0.0238568			0.00904572
Solyc09g083280.3	blue	PTHR31734//PTHR31734:SF11 - FAMILY NOT NAMED // AUXIN-RESPONSIVE PROTEIN IAA1-RELATED			0.00514886	0.00604437		0.000638385	0.0157086
Solyc09g083290.3	blue	PTHR31734:SF30 - AUXIN-RESPONSIVE PROTEIN IAA14-RELATED			6.18772e-06	4.37195e-06		5.60052e-05	2.29979e-05
Solyc09g083390.2	blue	PF03126 - Plus-3 domain (Plus-3)			7.54768e-63	3.80895e-65		1.13464e-68	5.6275e-67
Solyc09g083440.3	blue	PF00280 - Potato inhibitor I family (potato_inhibit)			3.58264e-05	1.61917e-09		6.48105e-10	6.21334e-05
Solyc09g089650.1	blue				0.000207766	0.0011849		0.0215514	0.0011647
Solyc09g089830.3	blue	PTHR10209//PTHR10209:SF135 - OXIDOREDUCTASE, 2OG-FE II OXYGENASE FAMILY PROTEIN // SUBFAMILY NOT NAMED			2.25388e-05	1.31012e-06		0.000198292	0.000252609
Solyc09g090330.3	blue	PF04755 - PAP_fibrillin (PAP_fibrillin)			7.12224e-12	1.14859e-13		4.4409e-09	1.22611e-09
Solyc09g090360.3	blue	PTHR10783:SF53 - PHOSPHATE TRANSPORTER PHO1			3.06761e-08	2.96802e-08		1.03999e-05	1.94938e-06
Solyc09g090380.1	blue	PTHR34657//PTHR34657:SF4 - FAMILY NOT NAMED // EMBRYO SAC DEVELOPMENT ARREST 6 PROTEIN			0.0280782
Solyc09g090557.1	blue				7.88583e-71	1.07941e-77		1.43434e-74	7.10781e-71
Solyc09g091170.3	blue	K11353 - NADH dehydrogenase (ubiquinone) 1 alpha subcomplex subunit 13 (NDUFA13)			0.00382219	0.025259		0.000108705	0.000209705
Solyc09g091220.2	blue				0.00277619	0.0140622			0.0363384
Solyc09g091590.3	blue	PTHR13516//PTHR13516:SF3 - RIBONUCLEASE P SUBUNIT P25 // ALBA DNA/RNA-BINDING PROTEIN			2.29095e-06	1.48463e-05		3.46116e-06	1.25907e-05
Solyc09g091960.3	blue	PTHR13711:SF213 - PROTEIN HMG-20			1.06067e-26	6.92449e-24		6.77641e-55	1.13331e-34
Solyc09g091970.3	blue	K07071 - uncharacterized protein (K07071)			9.61715e-34	3.83754e-37		1.73731e-30	4.59895e-31
Solyc09g091990.3	blue	PTHR27007:SF61 - RECEPTOR LIKE PROTEIN KINASE S.2				0.0199193		0.0127539
Solyc09g092130.3	blue	PTHR12526:SF360 - SUCROSE-PHOSPHATE SYNTHASE 3-RELATED			3.95203e-15	2.75286e-17		3.54307e-19	6.22382e-18
Solyc09g092480.2	blue				1.09778e-42	1.17586e-80		5.09501e-86	2.86152e-41
Solyc09g097830.3	blue	K09667 - protein O-GlcNAc transferase (OGT)			3.68195e-05	2.62629e-05		0.00416863	0.000638391
Solyc09g097910.3	blue	PTHR23270//PTHR23270:SF9 - PROGRAMMED CELL DEATH PROTEIN 11 PRE-RRNA PROCESSING PROTEIN RRP5 // SUBFAMILY NOT NAMED			4.33871e-18	1.30635e-19		5.69053e-17	2.01006e-14
Solyc10g005050.3	blue	PTHR33222//PTHR33222:SF9 - FAMILY NOT NAMED // PROTEIN CURVATURE THYLAKOID 1B, CHLOROPLASTIC			4.98165e-17	1.76242e-23		8.96758e-25	7.8992e-16
Solyc10g005080.3	blue	K12133 - MYB-related transcription factor LHY (LHY)			8.54026e-147	3.2072e-159		2.922e-164	2.45266e-148
Solyc10g005200.3	blue	KOG4735 - Extracellular protein with conserved cysteines			1.89932e-16	1.89623e-22		2.13466e-24	1.58514e-15
Solyc10g005320.3	blue	K01696 - tryptophan synthase beta chain (trpB)			0.00589621	0.0050898			0.021207
Solyc10g005330.3	blue	K09338 - homeobox-leucine zipper protein (HD-ZIP)			2.01291e-19	1.49244e-16		2.84611e-22	1.52743e-24
Solyc10g005340.3	blue	PTHR23177//PTHR23177:SF27 - MKIAA1688 PROTEIN // SUBFAMILY NOT NAMED			2.02249e-36	1.99019e-33		1.16876e-33	1.07084e-39
Solyc10g005380.3	blue				0.04325
Solyc10g005470.3	blue				4.82427e-23	1.61824e-28		4.46105e-29	1.04828e-24
Solyc10g005620.3	blue	1.14.99.44 - Diapolycopene oxygenase			0.00776525
Solyc10g005700.3	blue				0.00119147	0.00150966		0.000798729	0.00456943
Solyc10g006000.3	blue	PTHR13468//PTHR13468:SF1 - DEK PROTEIN // PROTEIN DEK			0.0335458
Solyc10g006140.3	blue	K09775 - hypothetical protein (K09775)			0.00170904	0.0215591		0.0371641	0.00199728
Solyc10g006153.1	blue	PF04078 - Cell differentiation family, Rcd1-like (Rcd1)			0.0447006
Solyc10g006240.3	blue	K06997 - uncharacterized protein (K06997)			5.39305e-32	3.81873e-33		1.17662e-29	2.63385e-30
Solyc10g006330.3	blue	PTHR33414//PTHR33414:SF2 - FAMILY NOT NAMED // PLASTID MOVEMENT IMPAIRED1			1.47551e-16	3.05292e-15		2.46651e-13	1.23658e-16
Solyc10g006970.3	blue	PTHR10438//PTHR10438:SF300 - THIOREDOXIN // THIOREDOXIN M1, CHLOROPLASTIC-RELATED			9.90768e-24	2.59716e-34		1.88807e-70	2.00647e-31
Solyc10g007100.3	blue	PTHR11206:SF78 - MATE EFFLUX FAMILY PROTEIN ALF5-RELATED			0.000161234	1.59111e-05		0.000109744	0.000165021
Solyc10g007110.3	blue	PTHR11751//PTHR11751:SF387 - SUBGROUP I AMINOTRANSFERASE RELATED // AMINOTRANSFERASE TAT2-RELATED			7.22472e-47	4.47392e-45		3.81873e-56	3.32794e-65
Solyc10g007500.3	blue	PTHR24055//PTHR24055:SF200 - MITOGEN-ACTIVATED PROTEIN KINASE // MITOGEN-ACTIVATED PROTEIN KINASE 18-RELATED			0.0126691
Solyc10g007510.2	blue	3.2.1.39 - Glucan endo-1,3-beta-D-glucosidase / Laminarinase			0.00664689				0.0378132
Solyc10g007750.1	blue	PF04450 - Peptidase of plants and bacteria (BSP)			0.000260048	0.000827616		0.00175759	0.000430127
Solyc10g008160.3	blue	PTHR31312:SF1 - TRANSCRIPTION ACTIVATOR GLK1-RELATED			9.57099e-07	8.17907e-11		9.57659e-07	5.69271e-05
Solyc10g008520.3	blue	PTHR31901:SF10 - AUXIN-RESPONSIVE GH3 FAMILY PROTEIN			3.54203e-15	1.46312e-12		7.0682e-10	8.14268e-14
Solyc10g008560.3	blue	KOG4249 - Uncharacterized conserved protein			0.000377856	0.00133046		0.00020179	0.000170374
Solyc10g009220.3	blue	PTHR24012//PTHR24012:SF479 - FAMILY NOT NAMED // RNA RECOGNITION MOTIF-CONTAINING PROTEIN			0.00175365	0.00197474		0.00272457	0.00138116
Solyc10g009290.1	blue	PTHR11514:SF40 - TRANSCRIPTION FACTOR BHLH14			1.01748e-05	3.6848e-05		0.00340218	0.000224766
Solyc10g009320.3	blue				0.000105501	0.00270231		0.0387448	0.000574687
Solyc10g017850.3	blue	PTHR12652//PTHR12652:SF16 - PEROXISOMAL BIOGENESIS FACTOR 11 // PEROXISOMAL MEMBRANE PROTEIN 11C-RELATED			1.75426e-05	6.11951e-10		1.69897e-12	3.92397e-05
Solyc10g017950.2	blue	PTHR34971:SF2 - PHOTOSYSTEM II REACTION CENTER PROTEIN Z			0.032017
Solyc10g018530.2	blue	K08741 - DNA mismatch repair protein MSH5 (MSH5)			0.00219193	0.00509311		0.0031517	0.000234606
Solyc10g018590.2	blue	PF04755 - PAP_fibrillin (PAP_fibrillin)			5.24144e-16	8.24922e-14		1.57365e-10	9.81844e-15
Solyc10g018610.1	blue	K02886 - large subunit ribosomal protein L2 (RP-L2, MRPL2, rplB)			1.49122e-07	4.37378e-06		6.87132e-06	1.39589e-05
Solyc10g039360.2	blue	PF07797 - Protein of unknown function (DUF1639) (DUF1639)				0.035155
Solyc10g044543.1	blue		0.0306327		0.01104	1.73532e-05		0.000976821
Solyc10g044840.2	blue	K06962 - uncharacterized protein (K06962)			3.68687e-05	9.73794e-05		0.00146567	0.000311079
Solyc10g045380.2	blue	PTHR17204//PTHR17204:SF28 - PRE-MRNA PROCESSING PROTEIN PRP39-RELATED // F1C9.34 PROTEIN-RELATED			0.0303399	0.0399124
Solyc10g047130.2	blue	K12885 - heterogeneous nuclear ribonucleoprotein G (RBMX, HNRNPG)			0.00268418	0.01801			0.0262326
Solyc10g049470.1	blue	PF05758 - Ycf1 (Ycf1)			7.26618e-11	4.81273e-12		5.67905e-08	1.66815e-08
Solyc10g049620.2	blue	1.3.99.6 - 3-oxo-5-beta-steroid 4-dehydrogenase / Delta(4)-3-ketosteroid 5-beta-reductase			6.91823e-06	4.28766e-07		9.7863e-07	4.4636e-05
Solyc10g049710.2	blue	PTHR10381//PTHR10381:SF18 - ATP-DEPENDENT CLP PROTEASE PROTEOLYTIC SUBUNIT // SUBFAMILY NOT NAMED			1.77122e-07	7.05551e-14		1.32717e-11	2.90172e-06
Solyc10g050110.1	blue	PTHR27000//PTHR27000:SF43 - FAMILY NOT NAMED // GENOMIC DNA, CHROMOSOME 3, P1 CLONE: MLD14			0.000169761	0.000681034		0.0124006	0.00120149
Solyc10g050440.2	blue				1.21965e-30	1.04405e-38		4.19012e-45	4.42461e-34
Solyc10g051010.2	blue	PF00067//PF04784//PF05699//PF13041//PF14389 - Cytochrome P450 (p450) // Protein of unknown function, DUF547 (DUF547) // hAT family C-terminal dimerisation region (Dimer_Tnp_hAT) // PPR repeat family (PPR_2) // Leucine-zipper of ternary complex factor MIP1 (Lzipper-MIP1)			2.36853e-05	0.000474715		0.000240165	8.18327e-05
Solyc10g051050.2	blue	PTHR23155:SF442 - PH DOMAIN LEUCINE-RICH REPEAT-CONTAINING PROTEIN PHOSPHATASE 2			0.0493897
Solyc10g051340.2	blue	PTHR10652//PTHR10652:SF12 - ADENYLYL CYCLASE-ASSOCIATED PROTEIN // SUBFAMILY NOT NAMED			5.97661e-07	9.09898e-07		3.24169e-06	6.9438e-06
Solyc10g053910.2	blue	PTHR12701//PTHR12701:SF17 - BCR-ASSOCIATED PROTEIN, BAP // SUBFAMILY NOT NAMED			0.0402255	0.0126438
Solyc10g054420.2	blue	PTHR31407:SF10 - PSBP-LIKE PROTEIN 2, CHLOROPLASTIC			4.36337e-25	2.76976e-26		1.24293e-28	2.46686e-26
Solyc10g054440.2	blue	K01583 - arginine decarboxylase (E4.1.1.19)			7.06478e-28	7.31824e-28		4.06227e-26	1.42944e-27
Solyc10g054820.2	blue	PTHR19139//PTHR19139:SF162 - AQUAPORIN TRANSPORTER // SUBFAMILY NOT NAMED			2.88074e-48	1.70678e-46		1.66829e-59	8.71766e-41
Solyc10g054870.2	blue	PTHR21139//PTHR21139:SF7 - TRIOSEPHOSPHATE ISOMERASE // TRIOSEPHOSPHATE ISOMERASE, CHLOROPLASTIC			5.28337e-84	2.20288e-81		5.22334e-136	1.34367e-78
Solyc10g054930.2	blue	KOG2922 - Uncharacterized conserved protein			0.0424991
Solyc10g055540.2	blue	PF05699 - hAT family C-terminal dimerisation region (Dimer_Tnp_hAT)				0.00339589		0.00719267
Solyc10g055700.2	blue	PF01535 - PPR repeat (PPR)			0.0121859				0.00454605
Solyc10g074580.2	blue	PTHR11014//PTHR11014:SF83 - PEPTIDASE M20 FAMILY MEMBER // SUBFAMILY NOT NAMED			8.53607e-10	4.83792e-09		8.98856e-07	5.58871e-08
Solyc10g074910.2	blue	PTHR23091//PTHR23091:SF229 - N-TERMINAL ACETYLTRANSFERASE // ACETYLTRANSFERASE NSI			0.000180222	0.00190534		0.00185804	0.000358007
Solyc10g075160.1	blue	PTHR19370//PTHR19370:SF120 - NADH-CYTOCHROME B5 REDUCTASE // FERREDOXIN-1, CHLOROPLASTIC-RELATED			9.10303e-82	1.68663e-109		2.22636e-121	8.76394e-83
Solyc10g076550.2	blue					0.0412052
Solyc10g076720.2	blue				0.00483968	0.00502536			0.0359267
Solyc10g078240.2	blue	K09754 - coumaroylquinate(coumaroylshikimate) 3'-monooxygenase (CYP98A3, C3'H)			1.5257e-32	2.31216e-107		9.87078e-133	1.74676e-30
Solyc10g078270.2	blue	PF00892 - EamA-like transporter family (EamA)			0.0159453
Solyc10g078390.2	blue	PTHR24349//PTHR24349:SF92 - SERINE/THREONINE-PROTEIN KINASE // SUBFAMILY NOT NAMED			0.0334781	0.0368408
Solyc10g078410.2	blue	PF00646 - F-box domain (F-box)			1.06096e-14	2.78e-12		2.24809e-11	5.80168e-12
Solyc10g078910.2	blue	PTHR32285//PTHR32285:SF22 - FAMILY NOT NAMED // PROTEIN TRICHOME BIREFRINGENCE-RELATED			0.00102905	0.012142			0.00147703
Solyc10g079200.2	blue	PTHR24089:SF341 - MITOCHONDRIAL CARNITINE/ACYLCARNITINE CARRIER-LIKE PROTEIN			3.2281e-80	4.70861e-90		8.11993e-85	9.51255e-74
Solyc10g079550.2	blue	K17969 - mitochondrial fission 1 protein (FIS1, TTC11, MDV2)			0.009187	0.0432517
Solyc10g079620.2	blue	PTHR12725//PTHR12725:SF60 - HALOACID DEHALOGENASE-LIKE HYDROLASE // SUBFAMILY NOT NAMED			1.44398e-103	8.1339e-99		6.26871e-153	3.89842e-164
Solyc10g080130.2	blue	K12586 - exosome complex component RRP43 (RRP43, EXOSC8, OIP2)	0.0137278			6.12369e-06	0.0235471	8.60223e-05
Solyc10g080500.2	blue	PTHR11937//PTHR11937:SF255 - ACTIN // SUBFAMILY NOT NAMED			1.02064e-40	2.98996e-54		1.87576e-61	4.59694e-40
[truncated: 5,669 more rows]

## Sheet: Table S5
Table S5. Differentially Expressed Genes in root. Here we highlighted the co-expression modules and DESeq2 Pvalue adjusted for each factors and their interactions.
Gene ID	Module	Description (SL3.2)	Genotype (G)	N level (N)	Time (T)	GxT	GxN	GxTxN	TxN
Solyc00g008680.3	black	PTHR10827:SF52 - IP16409P	0.0219739			0.000459671		0.00687024
Solyc00g174340.2	black	K13449 - pathogenesis-related protein 1 (PR1)			0.0129591	0.000412275		0.0275553
Solyc01g005120.3	black	PTHR31062:SF44 - XYLOGLUCAN ENDOTRANSGLUCOSYLASE/HYDROLASE PROTEIN 27-RELATED			0.00728191	0.00871649		0.0149525
Solyc01g005310.3	black	K01528 - dynamin GTPase (DNM)			0.0244986	0.0128272
Solyc01g005990.3	black	PTHR33044:SF28 - BIFUNCTIONAL INHIBITOR/LIPID-TRANSFER PROTEIN/SEED STORAGE 2S ALBUMIN SUPERFAMILY PROTEIN			0.00205191	0.000838163		0.0227894	0.0118084
Solyc01g006000.3	black	K07542 - phosphatidylinositol glycan, class V (PIGV)			0.0464955	0.0344817
Solyc01g006160.3	black	K02942 - large subunit ribosomal protein LP1 (RP-LP1, RPLP1)	0.000943899			0.000835658	0.00400281	0.00927718
Solyc01g007760.3	black	K06620 - transcription factor E2F3 (E2F3)				0.0465161
Solyc01g008090.3	black	K02978 - small subunit ribosomal protein S27e (RP-S27e, RPS27)	4.34396e-06			1.39712e-07	1.08498e-05	4.11597e-07
Solyc01g008320.3	black	PTHR23509//PTHR23509:SF10 - FAMILY NOT NAMED // PHOSPHOLIPASE DDHD1	0.0116198			0.000220781	0.04217	9.78017e-05
Solyc01g034020.3	black	PTHR11668//PTHR11668:SF287 - SERINE/THREONINE PROTEIN PHOSPHATASE // SERINE/THREONINE-PROTEIN PHOSPHATASE PP2A-4 CATALYTIC SUBUNIT	0.035702			0.00298131
Solyc01g056850.3	black	K01937 - CTP synthase (pyrG, CTPS)			6.54732e-05	1.56864e-08		6.49087e-05	0.00238556
Solyc01g057520.3	black	PTHR10997:SF29 - ARM REPEAT SUPERFAMILY PROTEIN			0.0153764			0.00428544	0.0125316
Solyc01g066910.3	black	PF14368 - Probable lipid transfer (LTP_2)				0.0333529		0.0144478	0.047823
Solyc01g067860.3	black	K00430 - peroxidase (E1.11.1.7)			2.19581e-05	9.73158e-15		1.09303e-14	0.000104544
Solyc01g068330.3	black	K14571 - ribosome biogenesis ATPase (RIX7, NVL)	0.0150554			0.0197723	0.00375133	0.0104074
Solyc01g068530.3	black	K02960 - small subunit ribosomal protein S16e (RP-S16e, RPS16)	0.00206522			0.000521677	0.0176601
Solyc01g073870.3	black	PF03004 - Plant transposase (Ptta/En/Spm family) (Transposase_24)				0.0371878
Solyc01g074040.2	black		0.000292131			0.000137153	6.16627e-05	8.62055e-05
Solyc01g079110.3	black	K11253 - histone H3 (H3)			6.49142e-05	5.8938e-06		0.00010003	0.000304681
Solyc01g079420.3	black	PTHR34372:SF2 - CYTOCHROME C OXIDASE SUBUNIT 5C-2-RELATED						0.0369636	0.0313755
Solyc01g080600.3	black	K11253 - histone H3 (H3)			0.00410564	0.00606121			0.0342421
Solyc01g081010.3	black	K06943 - nucleolar GTP-binding protein (NOG1)			0.0145107	0.00258238		0.000446158	0.015926
Solyc01g087740.1	black	PTHR10795//PTHR10795:SF394 - PROPROTEIN CONVERTASE SUBTILISIN/KEXIN // SUBFAMILY NOT NAMED			0.00410564	0.0147848
Solyc01g087860.2	black				0.0385527				0.034811
Solyc01g087995.1	black				0.0138332	0.000481271		0.00301567	0.0271772
Solyc01g088040.3	black							0.00183934	0.0315055
Solyc01g088480.3	black	2.7.4.14//2.7.4.22//2.7.4.25 - UMP/CMP kinase / Uridine monophosphate-cytidine monophosphate phosphotransferase // UMP kinase / Uridylate kinase // (d)CMP kinase / Deoxycytidylate kinase				0.0023506		0.00329992
Solyc01g088500.3	black	PF13947 - Wall-associated receptor kinase galacturonan-binding (GUB_WAK_bind)			0.00547472	0.0133967			0.0130341
Solyc01g090810.3	black				0.00308787	0.00315368			0.032678
Solyc01g091160.3	black				2.22187e-05	1.21763e-09		1.19431e-05	0.000737847
Solyc01g091530.3	black	PTHR32382:SF5 - FASCICLIN-LIKE ARABINOGALACTAN PROTEIN 10-RELATED			1.05212e-05	4.26952e-08		1.1037e-06	0.000291327
Solyc01g091700.3	black	PTHR31960:SF3 - F-BOX PROTEIN PP2-A13							0.00418401
Solyc01g096240.3	black	PF13301 - Protein of unknown function (DUF4079) (DUF4079)			0.048802			0.0301466	0.00855327
Solyc01g096680.3	black	PTHR19321//PTHR19321:SF4 - PROTEIN REGULATOR OF CYTOKINESIS 1 PRC1-RELATED // 65-KDA MICROTUBULE-ASSOCIATED PROTEIN 5			0.00230608	0.00043962		0.00593099	0.0081659
Solyc01g096700.3	black	K09522 - DnaJ homolog subfamily C member 2 (DNAJC2)			0.0200499	0.00613971		0.0242426
Solyc01g097750.1	black				0.000256671	0.000502535		0.0481347	0.00696699
Solyc01g099160.3	black	K15718 - linoleate 9S-lipoxygenase (LOX1_5)	0.00840118		0.0052604	1.5887e-05		0.00287494
Solyc01g099630.3	black	PTHR31062//PTHR31062:SF15 - FAMILY NOT NAMED // XYLOGLUCAN ENDOTRANSGLUCOSYLASE/HYDROLASE PROTEIN 4-RELATED			5.19967e-07	1.30059e-09		1.38206e-07	3.88652e-06
Solyc01g099710.3	black	PTHR12497:SF0 - TAFAZZIN				0.019308
Solyc01g099770.3	black	PTHR11991 - TRANSLATIONALLY CONTROLLED TUMOR PROTEIN-RELATED	0.0308028		0.00526002	8.25946e-08		6.61698e-05	0.0472157
Solyc01g100490.3	black	2.5.1.43 - Nicotianamine synthase		0.0337052	0.0323974		0.0417234	3.65011e-06	4.93323e-06
Solyc01g101000.3	black	K03083 - glycogen synthase kinase 3 beta (GSK3B)			0.0181898	0.0399248
Solyc01g102350.3	black	PTHR21562:SF5 - PECTINACETYLESTERASE FAMILY PROTEIN				0.0175358
Solyc01g102380.3	black							0.00484368	0.0134888
Solyc01g103185.1	black	KOG4148 - Uncharacterized conserved protein				0.0463311
Solyc01g103453.1	black		0.0182905			0.000711057		0.0190652
Solyc01g103590.3	black	PTHR10374//PTHR10374:SF13 - LACTOYLGLUTATHIONE LYASE GLYOXALASE I // SUBFAMILY NOT NAMED			0.0455825	0.00087074		0.00977182
Solyc01g103800.3	black	K02951 - small subunit ribosomal protein S12e (RP-S12e, RPS12)	0.00449387			0.00108357	0.0215065	0.00857309
Solyc01g104370.3	black	K02942 - large subunit ribosomal protein LP1 (RP-LP1, RPLP1)	0.00258344			3.77291e-06	0.00816085	1.11557e-05
Solyc01g105020.3	black	PTHR12320:SF9 - PROTEIN PHOSPHATASE 2C 62-RELATED			1.88588e-05	8.01861e-05		2.62277e-05	7.53885e-05
Solyc01g105070.3	black	PTHR31235//PTHR31235:SF27 - FAMILY NOT NAMED // PEROXIDASE 62-RELATED	0.0379349				0.00497344	0.0245385
Solyc01g106420.3	black	PTHR23505//PTHR23505:SF21 - FAMILY NOT NAMED // SPHINGOLIPID TRANSPORTER SPINSTER HOMOLOG 1-RELATED				0.0329039
Solyc01g111170.3	black	PTHR11071//PTHR11071:SF250 - PEPTIDYL-PROLYL CIS-TRANS ISOMERASE // SUBFAMILY NOT NAMED	0.0414155		0.0145886	1.07319e-07		7.44571e-07
Solyc01g111230.3	black	PTHR21495//PTHR21495:SF80 - NUCLEOPORIN-RELATED // DIRIGENT PROTEIN 23					0.0420334	0.00392756	0.0164957
Solyc01g111830.3	black	PTHR10108:SF858 - 24-METHYLENESTEROL C-METHYLTRANSFERASE 2-RELATED				0.0250707		0.0417973
Solyc02g021400.2	black	K02979 - small subunit ribosomal protein S28e (RP-S28e, RPS28)	0.0168942			0.00102728	0.0413944	0.00512697
Solyc02g038740.3	black	PTHR10572//PTHR10572:SF12 - 3-HYDROXY-3-METHYLGLUTARYL-COENZYME A REDUCTASE // SUBFAMILY NOT NAMED			0.00485855	0.00397275			0.0414424
Solyc02g063490.3	black	PTHR11540:SF27 - MALATE DEHYDROGENASE, GLYOXYSOMAL-RELATED			0.0237722	0.00264965		0.0276661
Solyc02g065170.3	black	PTHR11709//PTHR11709:SF26 - MULTI-COPPER OXIDASE // SUBFAMILY NOT NAMED			0.00558609	0.0112311
Solyc02g065780.1	black				2.10031e-05	1.81797e-05		3.90316e-06	9.08069e-06
Solyc02g067580.3	black	PF06522 - NADH-ubiquinone reductase complex 1 MLRQ subunit (B12D)			0.0106985	0.00745861		0.0475464	0.0365668
Solyc02g070500.1	black	PF04398 - Protein of unknown function, DUF538 (DUF538)	0.00454057		0.00760183	3.24332e-10	0.0374552	1.30762e-07	0.0433541
Solyc02g071930.1	black	K15731 - carboxy-terminal domain RNA polymerase II polypeptide A small phosphatase [EC:3.1.3.16] (CTDSP)			0.000478665	0.0019845		0.0391453	0.0057803
Solyc02g071940.1	black					0.0432027
Solyc02g077430.3	black	3.1.1.32 - Phospholipase A(1) / Phospholipase A1						1.33454e-06	8.69364e-05
Solyc02g077480.1	black	K11253 - histone H3 (H3)			7.39989e-06	5.33259e-07		1.70483e-05	9.68235e-05
Solyc02g077710.1	black	PTHR35274//PTHR35274:SF2 - FAMILY NOT NAMED // EXPRESSED PROTEIN-RELATED			0.00175489	0.000103662		0.00311433	0.0240928
Solyc02g077950.2	black	PTHR31992:SF8 - DOF ZINC FINGER PROTEIN DOF1.1-RELATED			3.18843e-08	2.22716e-07		1.16242e-05	9.16923e-08
Solyc02g078500.2	black	PTHR11772//PTHR11772:SF15 - ASPARAGINE SYNTHETASE // SUBFAMILY NOT NAMED					0.00502131	0.000856071	0.00964041
Solyc02g078650.3	black	PTHR11474//PTHR11474:SF33 - TYROSINASE // SUBFAMILY NOT NAMED		0.00229051			0.0064292	9.3069e-12	3.48701e-05
Solyc02g079440.2	black	1.3.3.8 - Tetrahydroberberine oxidase / THB oxidase			0.0232418	0.0438522
Solyc02g079960.3	black	PTHR10438:SF242 - THIOREDOXIN-LIKE PROTEIN CXXS1			0.000866198	0.00263623		5.82449e-10	4.79508e-05
Solyc02g080200.3	black	3.2.2.22 - rRNA N-glycosylase / rRNA N-glycosidase	0.0347339		8.81267e-05	3.99858e-12		7.01182e-14	0.00193098
Solyc02g080490.3	black	PTHR11206//PTHR11206:SF134 - MULTIDRUG RESISTANCE PROTEIN // SUBFAMILY NOT NAMED				0.0468948
Solyc02g082080.1	black	PTHR12483//PTHR12483:SF39 - SOLUTE CARRIER FAMILY 31 COPPER TRANSPORTERS // SUBFAMILY NOT NAMED			0.0444363				0.0346331
Solyc02g083500.3	black	PF00582 - Universal stress protein family (Usp)			1.12934e-07	3.43186e-08		0.000183395	2.11853e-05
Solyc02g086460.3	black				0.048427	0.0153831	0.01742	2.56945e-07	0.0117217
Solyc02g087780.3	black	K01785 - aldose 1-epimerase (galM, GALM)			0.0413739	0.000654798		0.00211531
Solyc02g089250.3	black	PF01190 - Pollen proteins Ole e I like (Pollen_Ole_e_I)	0.0031566			0.00216141
Solyc02g092215.1	black	PTHR31311//PTHR31311:SF3 - FAMILY NOT NAMED // GLYCOSYLTRANSFERASE 6-RELATED			0.00358808	0.00267938		0.0157314	0.00488809
Solyc02g092790.3	black	PTHR37209//PTHR37209:SF2 - FAMILY NOT NAMED // LYSINE-RICH ARABINOGALACTAN PROTEIN 17-RELATED			0.0105966	2.83443e-05		7.16295e-05
Solyc02g094400.3	black	PTHR22958 - RELATED TO MULTIFUNCTIONAL CYCLIN-DEPENDENT KINASE-RELATED			0.0191595	0.037056			0.0203639
Solyc03g005530.1	black	K08176 - MFS transporter, PHS family, inorganic phosphate transporter (PHO84)			1.72305e-13	3.51772e-10		1.52437e-25	3.58991e-21
Solyc03g007770.3	black	PTHR31269//PTHR31269:SF2 - FAMILY NOT NAMED // S-TYPE ANION CHANNEL SLAH2-RELATED						6.93158e-07	0.000318549
Solyc03g019690.1	black	PF00197 - Trypsin and protease inhibitor (Kunitz_legume)				0.005035		0.000751564
Solyc03g019780.3	black	K02998 - small subunit ribosomal protein SAe (RP-SAe, RPSA)	0.046716
Solyc03g020050.3	black	PF02428 - Potato type II proteinase inhibitor family (Prot_inhib_II)			0.0185167			0.00359969	0.0144225
Solyc03g025340.1	black	PF00168 - C2 domain (C2)			0.00579821	0.000557722		0.0146674	0.0252398
Solyc03g025380.3	black	K00430 - peroxidase (E1.11.1.7)	0.000261622		0.00453085	1.22435e-12	0.00231809	7.60223e-10	0.044758
Solyc03g031590.3	black	PF03595 - Voltage-dependent anion channel (SLAC1)			0.00985983	0.0405197		0.0320304	0.0168266
Solyc03g031620.3	black	1.8.4.10 - Adenylyl-sulfate reductase (thioredoxin) / Thioredoxin-dependent 5'-adenylylsulfate reductase			0.0225008	0.0104949
Solyc03g031690.3	black	K03016 - DNA-directed RNA polymerases I, II, and III subunit RPABC3 (RPB8, POLR2H)			0.0438866	0.00704355
Solyc03g034370.1	black				1.68334e-08	3.03962e-08		2.75847e-05	2.39373e-06
Solyc03g034430.2	black		2.61275e-07			3.4135e-08	1.09177e-07	3.16423e-08
Solyc03g044000.1	black	K02898 - large subunit ribosomal protein L26e (RP-L26e, RPL26)	0.0012219			1.71973e-06	0.0112993	2.87093e-05
Solyc03g044330.1	black	K01652 - acetolactate synthase I/II/III large subunit (E2.2.1.6L, ilvB, ilvG, ilvI)				0.00723432		0.0490026
Solyc03g046200.1	black	PTHR31983//PTHR31983:SF0 - FAMILY NOT NAMED // GLYCOSYL HYDROLASE FAMILY 81 PROTEIN	0.0297577
Solyc03g078640.1	black					0.0496365
Solyc03g082920.3	black	K09490 - heat shock 70kDa protein 5 (HSPA5, BIP)	0.0373905			0.00180055	0.00799141	7.24613e-05
Solyc03g083560.1	black	PF04674 - Phosphate-induced protein 1 conserved region (Phi_1)	0.0268304			0.00812456	0.000729595	8.44974e-05
Solyc03g083840.3	black	PTHR31707:SF45 - PECTINESTERASE/PECTINESTERASE INHIBITOR 33-RELATED			0.0107117	0.00982106		0.000497076	0.00190457
Solyc03g083970.3	black	PTHR33322//PTHR33322:SF3 - FAMILY NOT NAMED // BAG FAMILY MOLECULAR CHAPERONE REGULATOR 7			5.21302e-07	5.49775e-10		1.24434e-10	2.97269e-05
Solyc03g090990.1	black	PF14547 - Hydrophobic seed protein (Hydrophob_seed)				0.0102267		0.000719715
Solyc03g091010.1	black	PF14547 - Hydrophobic seed protein (Hydrophob_seed)	0.00454057			0.000253254	0.0159324	0.00409856
Solyc03g093070.2	black				0.00670841	0.000702		0.0120854	0.025142
Solyc03g093380.2	black	PTHR27003//PTHR27003:SF105 - FAMILY NOT NAMED // LEUCINE-RICH REPEAT PROTEIN KINASE-RELATED			1.69132e-28	1.02534e-34		1.42348e-64	3.53924e-44
Solyc03g095985.1	black		7.13647e-06		0.013845	1.02398e-11	2.35104e-07	5.46112e-16	0.00234764
Solyc03g096290.3	black	PTHR19139//PTHR19139:SF146 - AQUAPORIN TRANSPORTER // SUBFAMILY NOT NAMED			4.77182e-19	1.6335e-31		1.05715e-62	3.80717e-23
Solyc03g110875.1	black	K07342 - protein transport protein SEC61 subunit gamma and related proteins (SEC61G, SSS1, secE)					0.0279476	0.0192444
Solyc03g111120.3	black	2.3.3.9 - Malate synthase / Malic-condensing enzyme			3.35325e-17	3.83785e-31		2.60349e-32	2.85797e-17
Solyc03g111140.3	black	2.3.3.9 - Malate synthase / Malic-condensing enzyme	0.020846		0.0428742	0.000254495		0.00353623
Solyc03g111640.3	black	PTHR12626:SF0 - LD21074P	0.0279431			3.12326e-06		0.000451155
Solyc03g111690.3	black	PTHR31683:SF15 - PECTATE LYASE 18-RELATED			9.69775e-12	4.66438e-20		5.71749e-21	1.51262e-11
Solyc03g111797.1	black	PF14576//PF14577 - Sieve element occlusion N-terminus (SEO_N) // Sieve element occlusion C-terminus (SEO_C)	0.00496713		0.0125646	1.6602e-09	0.0274521	4.10068e-09	0.049371
Solyc03g112200.1	black		0.0271289			0.0225443
Solyc03g113780.3	black	1.4.3.5//5.1.99.6 - Pyridoxal 5'-phosphate synthase / Pyridoxine (pyridoxamine)phosphate oxidase // NAD(P)H-hydrate epimerase / NAD(P)HX epimerase			0.0108226	6.77079e-05		0.00282041
Solyc03g115870.3	black	PTHR10438:SF263 - THIOREDOXIN-LIKE 1-2, CHLOROPLASTIC			1.36041e-07	1.55286e-12		5.87234e-10	9.79537e-07
Solyc03g117070.1	black		0.0299619		0.0220212	9.99662e-05		0.010978
Solyc03g118380.2	black	K16253 - DNA-directed RNA polymerase IV and V subunit 7 (NRPD7, NRPE7)			0.035246	0.0352217			0.043073
Solyc03g119040.3	black	K14753 - guanine nucleotide-binding protein subunit beta-2-like 1 protein (RACK1)	3.3654e-07			4.72905e-12	8.97761e-06	9.95359e-10
Solyc03g120475.1	black	PTHR19139//PTHR19139:SF99 - AQUAPORIN TRANSPORTER // AQUAPORIN TIP2-1			2.69805e-10	6.34933e-12		1.40745e-12	5.29299e-09
Solyc03g120720.3	black	PTHR18929//PTHR18929:SF59 - PROTEIN DISULFIDE ISOMERASE // PROTEIN DISULFIDE ISOMERASE-LIKE 1-5-RELATED	0.0423071		0.00456088	3.02541e-05		0.0022649	0.0425747
Solyc03g120900.2	black	K14004 - protein transport protein SEC13 (SEC13)					0.00157835	0.00328083	0.0247903
Solyc03g121270.3	black	PTHR11014//PTHR11014:SF55 - PEPTIDASE M20 FAMILY MEMBER // IAA-AMINO ACID HYDROLASE ILR1-LIKE 1-RELATED						0.00965654	0.0138162
Solyc03g121580.3	black	PTHR22850:SF85 - WD-40 REPEAT-CONTAINING PROTEIN MSI4-RELATED			0.0180493	0.0119131
Solyc03g122250.3	black	PTHR21229:SF15 - LUNG SEVEN TRANSMEMBRANE RECEPTOR-LIKE PROTEIN			0.0038689	0.0376644			0.0294907
Solyc03g123910.3	black	PF13418//PF13964 - Galactose oxidase, central domain (Kelch_4) // Kelch motif (Kelch_6)			0.0487059				0.02468
Solyc04g007000.1	black	K09287 - RAV-like factor (RAV)				0.0396148
Solyc04g008340.2	black	K14713 - solute carrier family 39 (zinc transporter), member 7 (SLC39A7, KE4, ZIP7)						0.0354886
Solyc04g008470.3	black	PTHR33147//PTHR33147:SF3 - FAMILY NOT NAMED // DEFENSIN-LIKE PROTEIN 6	0.00939854			2.50593e-05	0.0307153	0.000425618
Solyc04g009157.1	black	PTHR23155//PTHR23155:SF634 - LEUCINE-RICH REPEAT-CONTAINING PROTEIN // SUBFAMILY NOT NAMED				0.0418578
Solyc04g009800.3	black	PTHR24349//PTHR24349:SF161 - SERINE/THREONINE-PROTEIN KINASE // CALCIUM-DEPENDENT PROTEIN KINASE 1-RELATED			0.00197108	0.0131812			0.0240928
Solyc04g010240.3	black	K02918 - large subunit ribosomal protein L35e (RP-L35e, RPL35)						0.000126875
Solyc04g010270.1	black	PTHR21495:SF51 - DIRIGENT PROTEIN 24-RELATED			2.28515e-06	2.78469e-08		4.97208e-06	3.30325e-05
Solyc04g011390.1	black	K11254 - histone H4 (H4)			0.00158258	3.6626e-05		0.000186618	0.00649297
Solyc04g015190.3	black	PTHR32227//PTHR32227:SF11 - FAMILY NOT NAMED // O-GLYCOSYL HYDROLASES FAMILY 17 PROTEIN				0.0456713
Solyc04g045550.1	black	PF05758 - Ycf1 (Ycf1)			0.00513586	0.00335589		0.00180912	0.00622055
Solyc04g051510.1	black	K13415 - protein brassinosteroid insensitive 1 (BRI1)	0.000396302		0.03439	9.36636e-07	0.00322368	5.51693e-05
Solyc04g054910.3	black	PTHR31657//PTHR31657:SF9 - FAMILY NOT NAMED // ETHYLENE-RESPONSIVE TRANSCRIPTION FACTOR CRF5-RELATED				0.0077881		0.0353265
Solyc04g054980.3	black	PTHR31718//PTHR31718:SF0 - FAMILY NOT NAMED // EXPRESSED PROTEIN-RELATED			0.00286602	0.0126421		0.00424498	0.00141037
Solyc04g055180.3	black	PTHR23354//PTHR23354:SF76 - NUCLEOLAR PROTEIN 7/ESTROGEN RECEPTOR COACTIVATOR-RELATED // SUBFAMILY NOT NAMED				0.0480573
Solyc04g058060.2	black	PF03080//PF14365 - Domain of unknown function (DUF239) (DUF239) // Domain of unknown function (DUF4409) (DUF4409)	0.000836536			0.000266862	0.00334401	0.00190503
Solyc04g063230.3	black	PTHR10108//PTHR10108:SF926 - METHYLTRANSFERASE // SUBFAMILY NOT NAMED	0.00731593			0.00225184	0.0187828	0.00977799
Solyc04g071070.2	black	PF04554 - Extensin-like region (Extensin_2)			1.15098e-29	5.514e-47		1.65928e-79	3.3468e-29
Solyc04g072000.3	black	PTHR22595//PTHR22595:SF37 - CHITINASE-RELATED // CHITINASE-RELATED				0.0206148	0.0144275	9.51943e-07
Solyc04g073990.3	black	PTHR10502:SF98 - ANNEXIN D1-RELATED			1.02028e-30	1.0812e-30		3.01244e-62	1.0516e-39
Solyc04g074730.1	black	2.7.7.48//3.4.22.44//3.4.22.45 - RNA-directed RNA polymerase / RNA nucleotidyltransferase (RNA-directed) // Nuclear-inclusion-a endopeptidase / Potyvirus NIa protease // Helper-component proteinase / HC-Pro			0.013428	0.0212877		0.00153157	0.0162747
Solyc04g078470.3	black	K14505 - cyclin D3, plant (CYCD3)			0.000411796	0.00256447			0.00306804
Solyc04g078500.1	black	PTHR10177//PTHR10177:SF256 - CYCLINE // SUBFAMILY NOT NAMED				0.0246386
Solyc04g080760.3	black	PTHR31388//PTHR31388:SF4 - FAMILY NOT NAMED // PEROXIDASE 9				0.0117701		0.00310679
Solyc04g080940.3	black	PTHR31218:SF53 - PROTEIN WALLS ARE THIN 1	0.0168942			0.013395	0.0224933	0.00773101
Solyc04g081590.3	black	2.7.10.2//2.7.11.1 - Non-specific protein-tyrosine kinase / Cytoplasmic protein tyrosine kinase // Non-specific serine/threonine protein kinase / Threonine-specific protein kinase					0.044199	0.000107348	0.00554821
Solyc04g081870.3	black	PTHR31867//PTHR31867:SF4 - FAMILY NOT NAMED // EXPANSIN-A11			5.17595e-06	2.72419e-05		0.00489178	0.000169768
Solyc05g005580.3	black	PF06075 - Plant protein of unknown function (DUF936) (DUF936)							0.0302808
Solyc05g008020.3	black	PTHR24055:SF211 - MITOGEN-ACTIVATED PROTEIN KINASE 16-RELATED			0.00386748	0.0151841			0.0124707
Solyc05g008200.3	black	PTHR11353:SF101 - 1-PHOSPHATIDYLINOSITOL-3-PHOSPHATE 5-KINASE FAB1C-RELATED			0.0223718	0.000446522		0.0164866
Solyc05g009130.3	black	PTHR31042//PTHR31042:SF17 - FAMILY NOT NAMED // CORE-2/I-BRANCHING BETA-1,6-N-ACETYLGLUCOSAMINYLTRANSFERASE FAMILY PROTEIN				0.000645144		0.0233227
Solyc05g009860.2	black	1.17.1.3 - Leucoanthocyanidin reductase / Leucocyanidin reductase				0.00796913		0.0464256
Solyc05g009890.1	black	PTHR13683//PTHR13683:SF354 - ASPARTYL PROTEASES // ASPARTYL PROTEASE FAMILY PROTEIN	0.0378255		0.00978916	4.23063e-05		0.00250609
Solyc05g012580.1	black				0.00230294	0.00240832		0.0216738	0.000902138
Solyc05g014470.3	black	PTHR10836//PTHR10836:SF44 - GLYCERALDEHYDE 3-PHOSPHATE DEHYDROGENASE // SUBFAMILY NOT NAMED			0.000538034	0.00457068		0.0148551	0.00173433
Solyc05g018880.1	black	K12259 - spermine oxidase (SMOX, PAO5)	0.0177105			0.00208523
Solyc05g044480.3	black	PF00176//PF00271//PF14634 - SNF2 family N-terminal domain (SNF2_N) // Helicase conserved C-terminal domain (Helicase_C) // zinc-RING finger domain (zf-RING_5)	0.0251532		0.0339909	0.000226105		0.0197914
Solyc05g046340.2	black	K17497 - phosphomannomutase (PMM)	0.0146002		0.0311534	0.000628895
Solyc05g050000.3	black	K15190 - 7SK snRNA methylphosphate capping enzyme [EC:2.1.1.-] (MEPCE, BCDIN3)			7.96665e-07	4.82462e-09		4.52941e-08	2.37909e-05
Solyc05g050540.3	black	PTHR11709//PTHR11709:SF33 - MULTI-COPPER OXIDASE // LACCASE-6			2.59133e-06	5.73507e-07		1.00301e-05	3.36722e-06
Solyc05g050830.2	black	PTHR31985//PTHR31985:SF11 - FAMILY NOT NAMED // ETHYLENE-RESPONSIVE TRANSCRIPTION FACTOR ERF035				0.0153844
Solyc05g050870.3	black	K00430 - peroxidase (E1.11.1.7)	0.0255065				0.0366299	0.000113406
Solyc05g050920.3	black	PTHR23023:SF94 - FLAVIN-CONTAINING MONOOXYGENASE FMO GS-OX-LIKE 1-RELATED				0.0035976		0.0467323
Solyc05g051250.3	black	K01915 - glutamine synthetase (glnA, GLUL)			0.00399377	0.000196044
Solyc05g051515.1	black	K11253 - histone H3 (H3)			0.00459417	0.00356826		0.0457274	0.038316
Solyc05g051520.3	black	K15334 - multisite-specific tRNA:(cytosine-C5)-methyltransferase [EC:2.1.1.202] (NCL1, TRM4)				0.0304356
Solyc05g051580.3	black	PTHR32370//PTHR32370:SF37 - FAMILY NOT NAMED // BTB/POZ DOMAIN-CONTAINING PROTEIN DOT3-RELATED			0.00327283	0.0149712			0.0180828
Solyc05g051640.3	black	PTHR27000//PTHR27000:SF1 - FAMILY NOT NAMED // LEUCINE-RICH REPEAT RECEPTOR-LIKE PROTEIN KINASE TDR			0.0178927	0.00990516
Solyc05g052260.3	black	PTHR11106 - GANGLIOSIDE INDUCED DIFFERENTIATION ASSOCIATED PROTEIN 2-RELATED				0.0402738
Solyc05g052660.1	black				0.00212188	0.0183574		0.000256031	0.000135693
Solyc05g052800.3	black	PTHR10902 - 60S RIBOSOMAL PROTEIN L35A			0.0358147				0.0106326
Solyc05g052970.3	black	PTHR10108//PTHR10108:SF803 - METHYLTRANSFERASE // METHYLTRANSFERASE PMT10-RELATED	0.0489692
Solyc05g053480.3	black	2.7.1.50 - Hydroxyethylthiazole kinase				0.0286508
Solyc05g053680.2	black		0.00376879			0.00337562	0.0115525	0.00883114
Solyc05g054620.3	black	PTHR31096//PTHR31096:SF4 - FAMILY NOT NAMED // ACT DOMAIN-CONTAINING PROTEIN			0.0027452	0.00029071		0.0267392	0.0460193
Solyc05g055290.3	black	3.1.1.2 - Arylesterase / Paraoxonase			2.69551e-06	4.94895e-05		6.96074e-05	3.92991e-06
Solyc05g056255.1	black	PTHR11538//PTHR11538:SF41 - PHENYLALANYL-TRNA SYNTHETASE // PHENYLALANINE--TRNA LIGASE, MITOCHONDRIAL				0.0285008
Solyc05g056470.1	black	PTHR19241//PTHR19241:SF230 - ATP-BINDING CASSETTE TRANSPORTER // ABC TRANSPORTER G FAMILY MEMBER 5			0.00569418	0.00657122		0.031053	0.0278523
Solyc06g005560.3	black	PTHR31867//PTHR31867:SF5 - FAMILY NOT NAMED // EXPANSIN-A16-RELATED			7.47589e-10	2.76141e-08		1.46245e-07	1.64639e-10
Solyc06g007670.3	black	K02932 - large subunit ribosomal protein L5e (RP-L5e, RPL5)	0.00510881			0.00358068	0.00518964	0.00199706
Solyc06g007910.3	black	PTHR23201//PTHR23201:SF1 - EXTENSIN, PROLINE-RICH PROTEIN // GIBBERELLIN-REGULATED PROTEIN 12-RELATED			0.00086434	3.9177e-05		0.000165733	0.00367059
Solyc06g008120.1	black	K17769 - mitochondrial import receptor subunit TOM22 (TOM22)				0.0241313
Solyc06g019170.3	black	1.2.1.41//2.7.2.11 - Glutamate-5-semialdehyde dehydrogenase / Glutamyl-gamma-semialdehyde dehydrogenase // Glutamate 5-kinase / Gamma-glutamyl kinase				0.00222844
Solyc06g043150.3	black	PTHR19918//PTHR19918:SF7 - CELL DIVISION CYCLE 20 CDC20 FIZZY -RELATED // PROTEIN FIZZY-RELATED 3			0.0120931	0.0383607
Solyc06g049050.3	black	PTHR31867:SF22 - EXPANSIN-A8			3.58422e-09	1.59629e-10		4.51694e-12	8.20714e-09
Solyc06g053480.3	black	PTHR31155//PTHR31155:SF9 - ACYL- ACYL-CARRIER-PROTEIN DESATURASE-RELATED // ACYL-[ACYL-CARRIER-PROTEIN] DESATURASE 7, CHLOROPLASTIC			0.0460213	0.000838163
Solyc06g060790.1	black	K01704 - 3-isopropylmalate/(R)-2-methylmalate dehydratase small subunit (leuD)				0.0368132
Solyc06g061200.1	black				3.26057e-11	8.71121e-24		5.79772e-40	2.29902e-09
Solyc06g062500.3	black	K02903 - large subunit ribosomal protein L28e (RP-L28e, RPL28)	0.0253798			0.0027656		0.0203477
Solyc06g064550.3	black	K12524 - bifunctional aspartokinase / homoserine dehydrogenase 1 (thrA)			0.00189364	0.00282302			0.0339023
Solyc06g065620.2	black		0.0385479			0.00947131		0.0485788
Solyc06g065820.3	black	PTHR31194//PTHR31194:SF4 - SHN SHINE , DNA BINDING / TRANSCRIPTION FACTOR // ETHYLENE-RESPONSIVE TRANSCRIPTION FACTOR ERF003			0.0478753	0.0224308
Solyc06g065840.3	black	PTHR21512:SF5 - TRAFFICKING PROTEIN PARTICLE COMPLEX SUBUNIT 9				0.015705
Solyc06g066660.3	black	PTHR10768 - 60S RIBOSOMAL PROTEIN L37	0.0402006			0.00960776	0.0447089	0.0057828
Solyc06g068410.3	black	K12581 - CCR4-NOT transcription complex subunit 7/8 (CNOT7_8, CAF1, POP2)				0.0419093
Solyc06g068990.3	black		0.0023185			0.000271144	0.0203943
Solyc06g069070.1	black	PF14368 - Probable lipid transfer (LTP_2)	0.000172252			2.01996e-05	0.00253562	0.00160301
Solyc06g071000.3	black	1.2.1.88 - L-glutamate gamma-semialdehyde dehydrogenase / Pyrroline-5-carboxylate dehydrogenase			1.68524e-05	5.3918e-05		0.00365396	0.000503135
Solyc06g071720.1	black	K02900 - large subunit ribosomal protein L27Ae (RP-L27Ae, RPL27A)	0.029715		0.0448058	3.0087e-07		2.27054e-06
Solyc06g072390.3	black	PTHR11200//PTHR11200:SF144 - INOSITOL 5-PHOSPHATASE // SUBFAMILY NOT NAMED			0.0313208				0.0181237
Solyc06g072810.3	black	PTHR33621//PTHR33621:SF2 - FAMILY NOT NAMED // T17B22.18 PROTEIN							0.0255766
Solyc06g073280.3	black	2.6.1.83 - LL-diaminopimelate aminotransferase / LL-diaminopimelate transaminase	0.00109143			3.24436e-05	0.013646	0.000970309
Solyc06g073300.1	black	K02901 - large subunit ribosomal protein L27e (RP-L27e, RPL27)	5.82125e-05			1.28761e-06	0.00180702	2.33072e-05
Solyc06g074780.2	black				0.00018692	0.000182864		0.00605834	0.00243877
Solyc06g075180.1	black	K02870 - large subunit ribosomal protein L12e (RP-L12e, RPL12)				0.0394246	0.04217	0.0246954
Solyc06g075800.1	black	K11252 - histone H2B (H2B)	0.017509		0.036449	1.68536e-05	0.0495627	0.000149163
Solyc06g075930.1	black	K11254 - histone H4 (H4)			6.12999e-05	4.31598e-05		0.000851297	0.000291851
Solyc06g076220.3	black	PTHR31867//PTHR31867:SF5 - FAMILY NOT NAMED // EXPANSIN-A16-RELATED			0.000976602	0.000875721		0.000438928	0.00462279
Solyc06g082995.1	black	PTHR23426//PTHR23426:SF30 - FERREDOXIN/ADRENODOXIN // ADRENODOXIN-LIKE PROTEIN, MITOCHONDRIAL			0.000787672	9.47176e-05		0.00134599	0.00344934
Solyc06g084045.1	black	PTHR34552:SF1 - PHOTOSYSTEM II REACTION CENTER W PROTEIN, CHLOROPLASTIC			0.0088945	0.0110697
Solyc07g005090.3	black	PTHR11177//PTHR11177:SF208 - CHITINASE // SUBFAMILY NOT NAMED			0.00338455	0.000340112		0.00142802	0.0157101
Solyc07g006230.1	black				1.13282e-05	5.13126e-09		8.6435e-08	3.32928e-05
Solyc07g006500.3	black	PTHR10788//PTHR10788:SF30 - TREHALOSE-6-PHOSPHATE SYNTHASE // ALPHA,ALPHA-TREHALOSE-PHOSPHATE SYNTHASE [UDP-FORMING] 11-RELATED				0.023065		0.00120402	0.0264686
Solyc07g006710.2	black					0.00388515
Solyc07g009080.3	black				2.30813e-13	8.47575e-13		4.20243e-08	1.20318e-13
Solyc07g009260.3	black	PTHR33147//PTHR33147:SF4 - FAMILY NOT NAMED // DEFENSIN-LIKE PROTEIN 13-RELATED			0.000309901	8.97758e-05		9.66317e-05	4.20669e-05
Solyc07g009500.2	black	PTHR22595//PTHR22595:SF34 - CHITINASE-RELATED // BASIC ENDOCHITINASE B			0.00370781	2.84611e-07		1.12995e-06	0.0229209
Solyc07g017410.3	black	K17402 - small subunit ribosomal protein S23 (MRPS23)	0.0109076			0.0147928
Solyc07g018290.3	black	PTHR32467:SF23 - AP2-LIKE ETHYLENE-RESPONSIVE TRANSCRIPTION FACTOR AIL5				0.0365217
Solyc07g021630.3	black	K00826 - branched-chain amino acid aminotransferase (E2.6.1.42, ilvE)			0.0166241	0.000217906		0.0215111
Solyc07g041970.3	black	PTHR10795//PTHR10795:SF434 - PROPROTEIN CONVERTASE SUBTILISIN/KEXIN // SUBTILISIN SERINE PROTEASE-RELATED			0.0102655			0.0421698	0.00402415
Solyc07g043320.3	black	PTHR18937//PTHR18937:SF225 - STRUCTURAL MAINTENANCE OF CHROMOSOMES SMC FAMILY MEMBER // SUBFAMILY NOT NAMED				0.0237759		3.50956e-06
Solyc07g045210.1	black		0.0412374		0.0279572	0.000559345		0.00749788
Solyc07g045440.1	black	PTHR32382//PTHR32382:SF4 - FAMILY NOT NAMED // FASCICLIN-LIKE ARABINOGALACTAN PROTEIN 1	0.033904		0.000694474	1.24208e-08		4.80787e-05	0.00783782
Solyc07g052510.3	black					0.000837105		0.000350174
Solyc07g053120.3	black	PF07714//PF08276 - Protein tyrosine kinase (Pkinase_Tyr) // PAN-like domain (PAN_2)				0.0494809
Solyc07g053640.1	black		0.0252395			0.000353918	0.0189519	0.000343849
Solyc07g054430.3	black	2.1.2.5//6.3.3.2 - Glutamate formimidoyltransferase / Glutamate formyltransferase // 5-formyltetrahydrofolate cyclo-ligase / Methenyl-THF synthetase			0.00245111	0.0239078			0.00348908
Solyc07g054690.1	black					0.00886154
Solyc07g061930.1	black				0.0219069	0.0487982			0.0265245
Solyc07g062700.3	black	PTHR10891//PTHR10891:SF386 - EF-HAND CALCIUM-BINDING DOMAIN CONTAINING PROTEIN // SUBFAMILY NOT NAMED	0.000495448			0.000730329	0.0117298	0.00703395
Solyc07g063390.3	black	PTHR10353//PTHR10353:SF42 - GLYCOSYL HYDROLASE // SUBFAMILY NOT NAMED			3.78097e-05	0.000831723		0.00210359	1.56008e-05
Solyc07g063733.1	black				0.0299897			0.0490226
Solyc07g065110.1	black	PF14368 - Probable lipid transfer (LTP_2)	2.19991e-05			1.50817e-07	0.000159415	5.05307e-07
Solyc07g066440.3	black				0.0302211	0.0474693		0.0464175	0.0275542
Solyc08g005540.2	black	PTHR11785//PTHR11785:SF355 - AMINO ACID TRANSPORTER // SUBFAMILY NOT NAMED			0.0385975				0.0299449
Solyc08g006790.3	black	PTHR33021:SF48 - EARLY NODULIN-LIKE PROTEIN 11-RELATED			1.62781e-05	3.77086e-06		1.36983e-05	4.46467e-06
Solyc08g006850.3	black	KOG0513 - Ca2+-independent phospholipase A2				0.00787329
Solyc08g006890.3	black	PTHR11588//PTHR11588:SF103 - TUBULIN // SUBFAMILY NOT NAMED			7.44753e-05	0.0011733		0.00134599	0.00115634
Solyc08g007420.3	black	1.1.1.27 - L-lactate dehydrogenase / L-lactic dehydrogenase							0.0445273
Solyc08g007430.2	black	PTHR11654//PTHR11654:SF78 - OLIGOPEPTIDE TRANSPORTER-RELATED // PROTEIN NRT1/ PTR FAMILY 6.3			4.34756e-08	2.22771e-06	0.0107552	1.41314e-75	5.37815e-14
Solyc08g008530.1	black	4.1.2.53 - 2-keto-3-deoxy-L-rhamnonate aldolase / KDR aldolase				0.0391038
Solyc08g014560.2	black	PTHR31375:SF18 - POLYGALACTURONASE-RELATED	2.41657e-05			5.82845e-05	0.0022849	0.0152865
Solyc08g014600.3	black	2.1.1.9 - Thiol S-methyltransferase				0.00366854		0.0412032
Solyc08g041860.1	black	PF15365 - Proline-rich nuclear receptor coactivator (PNRC)			0.0392821	0.00581308
Solyc08g042130.3	black				0.0300346	0.00887551
Solyc08g044510.3	black	3.2.1.119//3.2.1.21 - Vicianin beta-glucosidase // Beta-glucosidase / Gentobiase			0.000565253	2.02964e-05	0.0218521	4.1983e-13	4.80462e-05
Solyc08g066490.3	black	PF00560//PF07714//PF08263//PF13855 - Leucine Rich Repeat (LRR_1) // Protein tyrosine kinase (Pkinase_Tyr) // Leucine rich repeat N-terminal domain (LRRNT_2) // Leucine rich repeat (LRR_8)			0.00773754	0.0216994			0.0425538
Solyc08g067500.2	black				2.72947e-10	1.70407e-27		4.0104e-28	3.2202e-08
Solyc08g068730.1	black	2.3.1.110 - Tyramine N-feruloyltransferase	0.0216709			0.015949	0.000777709	0.000105433
Solyc08g074680.2	black				0.00124578	0.00808616		0.0488964	0.00913228
Solyc08g075080.3	black	PTHR14155//PTHR14155:SF153 - RING FINGER DOMAIN-CONTAINING // RING/U-BOX DOMAIN-CONTAINING PROTEIN			0.0063131	0.0396638
Solyc08g075520.3	black	PF13369 - Transglutaminase-like superfamily (Transglut_core2)			6.52202e-07	1.35038e-05		9.88821e-08	9.72046e-11
Solyc08g076335.1	black	K02983 - small subunit ribosomal protein S30e (RP-S30e, RPS30)	0.00536034			0.00380008	0.0303878	0.0320586
Solyc08g076620.1	black	PTHR13683//PTHR13683:SF315 - ASPARTYL PROTEASES // SUBFAMILY NOT NAMED			0.0125233	0.041232			0.0444493
Solyc08g076885.1	black				0.00789931	0.000963113	0.0392515	2.17529e-07	8.28982e-08
Solyc08g077240.3	black	PTHR10108//PTHR10108:SF922 - METHYLTRANSFERASE // METHYLTRANSFERASE PMT14-RELATED			0.0103307	0.0287365
Solyc08g077510.3	black	K14648 - poly(U)-specific endoribonuclease (ENDOU, PP11)						0.0343308
Solyc08g078870.2	black	PF14547 - Hydrophobic seed protein (Hydrophob_seed)			3.06237e-07	1.42934e-28		9.70895e-50	3.04786e-06
Solyc08g078880.3	black	PTHR32468//PTHR32468:SF26 - FAMILY NOT NAMED // CATION/H(+) ANTIPORTER 15			0.0424171	0.0226212
Solyc08g078910.2	black		0.000366221		0.0117363	3.99614e-09	0.00363823	6.50558e-06
Solyc08g078930.1	black	PF14547 - Hydrophobic seed protein (Hydrophob_seed)	7.4075e-05			1.61304e-05	0.000747427	0.00812519
Solyc08g078950.3	black	PTHR11654//PTHR11654:SF78 - OLIGOPEPTIDE TRANSPORTER-RELATED // PROTEIN NRT1/ PTR FAMILY 6.3			1.45775e-06	4.72402e-08		2.02591e-10	4.05208e-05
Solyc08g079090.3	black	PTHR11709:SF82 - MONOCOPPER OXIDASE-LIKE PROTEIN SKU5			0.000168285	2.57033e-05		2.52442e-08	1.10236e-05
Solyc08g079190.1	black	PF14547 - Hydrophobic seed protein (Hydrophob_seed)			9.78776e-05	0.000133173		0.000516325	0.00033182
Solyc08g082250.3	black	PTHR22298:SF19 - ENDOGLUCANASE 19-RELATED						0.0150687
Solyc08g082370.1	black				0.0478753	0.0137046
Solyc08g082740.3	black	K03105 - signal recognition particle subunit SRP19 (SRP19)	0.000358091			9.91156e-07	0.00675333	0.00031992
Solyc08g083330.2	black	PTHR19308//PTHR19308:SF12 - PHOSPHATIDYLCHOLINE TRANSFER PROTEIN // SUBFAMILY NOT NAMED		0.0369867			0.00152509	3.31171e-08	0.00411749
Solyc09g005720.3	black	PTHR11620//PTHR11620:SF23 - 60S RIBOSOMAL PROTEIN L23A // 60S RIBOSOMAL PROTEIN L23A-1				0.0182571	0.0404615	0.00852994
Solyc09g005750.3	black	PTHR21726:SF49 - PHOSPHATIDYLINOSITOL N-ACETYGLUCOSAMINLYTRANSFERASE SUBUNIT P-LIKE PROTEIN	0.0411239			0.0157617
Solyc09g014280.1	black	2.3.1.133 - Shikimate O-hydroxycinnamoyltransferase			0.0170677	0.000232561		0.000149594	0.0448843
Solyc09g014480.2	black	PTHR27000//PTHR27000:SF136 - FAMILY NOT NAMED // POLYGALACTURONASE INHIBITOR 1-RELATED				0.0270634
Solyc09g015080.3	black	PTHR23324//PTHR23324:SF57 - SEC14 RELATED PROTEIN // PATELLIN-6			0.00431223	0.0328149			0.040165
Solyc09g015830.2	black	PTHR27003//PTHR27003:SF53 - FAMILY NOT NAMED // RECEPTOR-LIKE PROTEIN KINASE FERONIA	0.0211625			0.004722	0.00900004	0.00178901
Solyc09g031590.3	black	K17917 - sorting nexin-1/2 (SNX1_2)			0.00117047	0.006126			0.0181951
Solyc09g057630.3	black	PTHR32227:SF65 - O-GLYCOSYL HYDROLASES FAMILY 17 PROTEIN			0.00382585	0.00141222		0.0190613	0.0324397
Solyc09g065383.1	black					0.038334		0.0290041
Solyc09g066470.3	black	PTHR12847:SF6 - ABC TRANSPORTER I FAMILY MEMBER 19-RELATED			0.000277494	0.000853133		0.00892939	0.00943201
Solyc09g074430.3	black	PTHR23023//PTHR23023:SF142 - DIMETHYLANILINE MONOOXYGENASE // SUBFAMILY NOT NAMED			3.61169e-06	1.98061e-10		6.52875e-07	0.000189302
Solyc09g075060.3	black	PTHR10353//PTHR10353:SF29 - GLYCOSYL HYDROLASE // BETA-GLUCOSIDASE 1-RELATED			0.00792459	0.00466167		0.047815
Solyc09g075210.3	black	PTHR33509:SF5 - LATE EMBRYOGENESIS ABUNDANT 3 (LEA3) FAMILY PROTEIN			2.72567e-09	3.69939e-08		1.19339e-80	4.59373e-16
Solyc09g075350.3	black	PTHR31707:SF25 - PECTINESTERASE/PECTINESTERASE INHIBITOR 39-RELATED			0.00044999	0.000443891		0.0328253	0.0078186
Solyc09g075710.2	black				0.000108215	1.00696e-05		0.00031992	0.000696709
Solyc09g075960.1	black	PF05910 - Plant protein of unknown function (DUF868) (DUF868)			0.00794757	0.0133227			0.0311499
Solyc09g082370.3	black	PTHR11200//PTHR11200:SF130 - INOSITOL 5-PHOSPHATASE // SUBFAMILY NOT NAMED			0.0327773	0.0352755		0.0198563	0.0293982
Solyc09g082520.3	black	K02984 - small subunit ribosomal protein S3Ae (RP-S3Ae, RPS3A)	0.0360477			0.00222199	0.0477836	0.00420826
Solyc09g082860.3	black	2.7.7.4 - Sulfate adenylyltransferase / Sulfurylase			0.0134319	2.48185e-09		2.22153e-09	0.0489982
Solyc09g083380.3	black	PTHR11467//PTHR11467:SF44 - HISTONE H1/H5 // SUBFAMILY NOT NAMED			0.024004			0.000178971	7.20707e-05
Solyc09g084465.1	black	PF00280 - Potato inhibitor I family (potato_inhibit)	0.00160655		1.44356e-05	3.15959e-17	0.0218616	9.81589e-11	0.000291899
Solyc09g089530.3	black	PF00280 - Potato inhibitor I family (potato_inhibit)			0.00106219	0.00143655			0.0229027
Solyc09g090070.2	black		0.000514535			5.5884e-06	0.00230043	7.79291e-05
Solyc09g090360.3	black	PTHR10783:SF53 - PHOSPHATE TRANSPORTER PHO1			4.78903e-07	1.6602e-09		5.71694e-17	2.59777e-09
Solyc09g090970.3	black	PF00407 - Pathogenesis-related protein Bet v I family (Bet_v_1)			0.00415174	7.67062e-05		0.00228809	0.0362633
Solyc09g091600.3	black	PTHR36326:SF1 - PROTEIN MALE STERILE 5	0.0335125		0.0472612	1.11375e-06		2.91448e-05
Solyc09g091650.3	black	K11269 - chromosome transmission fidelity protein 18 (CTF18, CHL12)				0.0262125
Solyc09g091670.3	black	PTHR19241//PTHR19241:SF221 - ATP-BINDING CASSETTE TRANSPORTER // SUBFAMILY NOT NAMED				0.00217331		0.00224178
Solyc09g091820.3	black		0.0397108			0.00650319		0.00367852
Solyc09g092380.3	black	K01251 - adenosylhomocysteinase (E3.3.1.1, ahcY)	0.00109021			3.51279e-08	0.0129997	0.000744627
Solyc09g092390.3	black		0.00622286			2.95477e-07	0.0427824	1.5699e-05
Solyc09g097900.3	black	PTHR24073//PTHR24073:SF394 - FAMILY NOT NAMED // RAS-RELATED PROTEIN RABA5B-RELATED			0.030152	0.00541171
Solyc09g098445.1	black	PTHR12263:SF4 - ATPASE, V0 COMPLEX, SUBUNIT E			0.0294959	0.0188567		0.0225899
Solyc10g005230.3	black	1.6.5.3 - NADH:ubiquinone reductase (H(+)-translocating) / Ubiquinone reductase				0.0267103		4.43413e-05
Solyc10g005390.3	black	K15086 - (3S)-linalool synthase (TPS14)	0.00313412			0.000119849	0.0371585	0.00298299
Solyc10g005960.1	black	PTHR32382//PTHR32382:SF4 - FAMILY NOT NAMED // FASCICLIN-LIKE ARABINOGALACTAN PROTEIN 1			0.0444363	0.0248109		0.0437177
Solyc10g007650.3	black	K03009 - DNA-directed RNA polymerases I, II, and III subunit RPABC4 (RPB12, POLR2K)			0.0389658	0.0341423
Solyc10g007970.2	black	PTHR31282:SF9 - WRKY TRANSCRIPTION FACTOR 65-RELATED				0.0020372		0.024249
Solyc10g008910.1	black	K11253 - histone H3 (H3)			1.03393e-06	2.25275e-05		0.000152197	4.93323e-06
Solyc10g009190.1	black				0.00260805	0.000224553		0.0305284	0.0420505
Solyc10g018530.2	black	K08741 - DNA mismatch repair protein MSH5 (MSH5)			0.0165834	0.00941672
Solyc10g047560.2	black	PTHR10334//PTHR10334:SF223 - CYSTEINE-RICH SECRETORY PROTEIN-RELATED // F2J10.6 PROTEIN-RELATED			0.0107117	6.53287e-11		8.51378e-05
Solyc10g049970.2	black	3.5.1.9 - Arylformamidase / Kynurenine formamidase			6.77753e-06	4.07578e-06		0.000414689	0.000238998
Solyc10g052880.1	black	PTHR27000:SF52 - LEUCINE-RICH REPEAT (LRR) FAMILY PROTEIN-RELATED				0.00302802
Solyc10g076180.1	black	PTHR33057:SF22 - OVATE FAMILY PROTEIN 1-RELATED			0.00149332	0.00643271			0.0240928
Solyc10g076220.2	black	K00430 - peroxidase (E1.11.1.7)	8.77272e-05			8.26478e-07	0.00167431	6.46521e-05
Solyc10g076360.1	black	PTHR19317//PTHR19317:SF14 - PRENYLATED RAB ACCEPTOR 1-RELATED // PRA1 FAMILY PROTEIN B4-RELATED	0.0299619			0.0332268
Solyc10g076790.2	black	PTHR22950//PTHR22950:SF256 - AMINO ACID TRANSPORTER // AUXIN TRANSPORTER PROTEIN 1-RELATED			0.0107179				0.0353765
Solyc10g078580.1	black	PTHR34114//PTHR34114:SF2 - FAMILY NOT NAMED // ARABINOGALACTAN PEPTIDE 12-RELATED			1.03361e-08	3.91464e-10		4.71761e-11	5.64874e-07
Solyc10g078620.1	black	K02989 - small subunit ribosomal protein S5e (RP-S5e, RPS5)	0.00510884			0.00128535	0.0338238
Solyc10g078630.2	black	K02979 - small subunit ribosomal protein S28e (RP-S28e, RPS28)	5.38203e-05			4.70003e-09	0.000713	1.03241e-07
Solyc10g078790.1	black	KOG2398 - Predicted proline-serine-threonine phosphatase-interacting protein (PSTPIP)	0.03255			0.0112311		0.0365118
Solyc10g079370.2	black	K03124 - transcription initiation factor TFIIB (TFIIB, GTF2B, SUA7, tfb)			0.0374176	0.046984
Solyc10g079660.2	black	PTHR13935:SF41 - ACHAETE-SCUTE HOMOLOG 3			0.0414245				0.0317246
Solyc10g079770.2	black	K14674 - TAG lipase / steryl ester hydrolase / phospholipase A2 / LPA acyltransferase (TGL4)			0.0144511	0.0157314		0.0195146	0.0166656
Solyc10g080370.1	black		0.000247453			0.000122003	0.00562911	0.00473469
Solyc10g081120.2	black	K01209 - alpha-N-arabinofuranosidase (E3.2.1.55, abfA)						0.0440104
Solyc10g081300.1	black	PTHR31810//PTHR31810:SF2 - FAMILY NOT NAMED // METACASPASE-9				0.0339819
Solyc10g081390.1	black						0.0255336	0.0225674
Solyc10g084320.2	black	PTHR10795//PTHR10795:SF400 - PROPROTEIN CONVERTASE SUBTILISIN/KEXIN // SUBFAMILY NOT NAMED				0.0204298
Solyc10g085320.2	black	PTHR32285:SF32 - PROTEIN TRICHOME BIREFRINGENCE-LIKE 35			0.0423123				0.00582371
Solyc10g085850.1	black				1.5927e-05	3.84831e-05		0.000168506	6.55977e-05
Solyc10g086520.2	black	PTHR31867//PTHR31867:SF5 - FAMILY NOT NAMED // EXPANSIN-A16-RELATED			8.53099e-06	2.27397e-06		7.11877e-06	6.35228e-06
Solyc11g005720.1	black	PF05678 - VQ motif (VQ)				0.00905771
Solyc11g006640.2	black	PTHR23155:SF442 - PH DOMAIN LEUCINE-RICH REPEAT-CONTAINING PROTEIN PHOSPHATASE 2				0.046387
Solyc11g007130.2	black	KOG2816 - Predicted transporter ADD1 (major facilitator superfamily)		3.76934e-05			0.000292519	5.3549e-12	5.30877e-13
Solyc11g007960.2	black	PTHR23244//PTHR23244:SF321 - KELCH REPEAT DOMAIN // KELCH REPEAT-CONTAINING PROTEIN 1-RELATED			0.0286194			0.0191516
Solyc11g010240.2	black	PF00125//PF12070 - Core histone H2A/H2B/H3/H4 (Histone) // Protein of unknown function (DUF3550/UPF0682) (DUF3550)			0.0333491	0.0251395
Solyc11g010390.1	black		0.0150373		0.0179353	2.05856e-05		0.00343176
Solyc11g011210.2	black	PTHR23201//PTHR23201:SF1 - EXTENSIN, PROLINE-RICH PROTEIN // GIBBERELLIN-REGULATED PROTEIN 12-RELATED			5.13885e-06	1.25441e-06		0.000128818	0.000141897
Solyc11g012320.2	black				0.0319346				0.0438596
Solyc11g012870.2	black	PTHR23354//PTHR23354:SF75 - NUCLEOLAR PROTEIN 7/ESTROGEN RECEPTOR COACTIVATOR-RELATED // LYSM DOMAIN-CONTAINING GPI-ANCHORED PROTEIN 1			1.56961e-08	1.04418e-09		8.64734e-07	1.84138e-06
Solyc11g028070.2	black	PF00304 - Gamma-thionin family (Gamma-thionin)	0.00265636			6.66592e-05	0.0251035	0.00329029
Solyc11g031950.1	black	K18801 - glucuronoxylan 4-O-methyltransferase (GXM)			0.00138344	0.00824849			0.0208784
Solyc11g045260.1	black	PTHR33180:SF4 - PHOTOSYSTEM II CP43 CHLOROPHYLL APOPROTEIN				0.00143655		0.0144256
Solyc11g061720.1	black	PTHR24351:SF107 - AGC (CAMP-DEPENDENT, CGMP-DEPENDENT AND PROTEIN KINASE C) KINASE FAMILY PROTEIN	5.17431e-05			2.08407e-06	0.000605677	0.000220588
Solyc11g065190.2	black	K06688 - ubiquitin-conjugating enzyme E2 C (UBE2C, UBC11)			5.80187e-07	5.47456e-10		2.82882e-07	7.4704e-06
Solyc11g066130.1	black	PF00314 - Thaumatin family (Thaumatin)			0.0146565	0.00122436		0.00213202
Solyc11g066140.2	black	PTHR30509//PTHR30509:SF7 - P-HYDROXYBENZOIC ACID EFFLUX PUMP SUBUNIT-RELATED // SUBFAMILY NOT NAMED			0.00465296	0.00555531	0.014614	1.61025e-08	1.27277e-08
Solyc11g067160.2	black	1.1.1.72 - Glycerol dehydrogenase (NADP(+))			0.000441815	0.00127474			0.012158
Solyc11g067320.1	black	K01015 - alcohol sulfotransferase (SULT2B1)			3.8466e-06	0.000142316		0.000773296	1.08192e-05
Solyc11g068830.2	black	2.4.2.10 - Orotate phosphoribosyltransferase / Orotidylic acid phosphorylase			1.84327e-06	5.10632e-06		0.000604533	3.35257e-05
Solyc11g069270.2	black	PTHR23421:SF58 - BETA-GALACTOSIDASE 8			0.000792793	0.00544226			0.0147109
Solyc11g069760.1	black	K02575 - MFS transporter, NNP family, nitrate/nitrite transporter (NRT, narK, nrtP, nasA)		0.00920759	0.0333572	0.0352093	0.000123306	3.04329e-09	1.48723e-05
Solyc11g071640.2	black	3.2.1.186 - Protodioscin 26-O-beta-D-glucosidase / Torvosidase			0.0165134			0.0274305	0.0162508
Solyc11g072500.2	black	PF02701 - Dof domain, zinc finger (zf-Dof)			0.000327257	8.23415e-06		0.00238975	0.00362603
Solyc12g005810.1	black				0.0339964	0.00558517		0.00944377	0.0183529
Solyc12g006970.1	black		0.0392966			0.00352684		0.0204491
Solyc12g008530.2	black	PTHR31321//PTHR31321:SF17 - FAMILY NOT NAMED // PECTINESTERASE 53-RELATED			0.000118638	2.9436e-05		0.00330359	0.00217138
Solyc12g009270.1	black	3.1.1.11 - Pectinesterase / Pectin methylesterase			1.36531e-05	1.37222e-05		0.00127446	0.000292437
Solyc12g009300.2	black		0.0252395			4.95549e-05	0.00198251	1.0008e-07
Solyc12g009570.2	black	PTHR24343//PTHR24343:SF157 - SERINE/THREONINE KINASE // CBL-INTERACTING SERINE/THREONINE-PROTEIN KINASE 24			0.0258443	0.000996276		0.00121629
Solyc12g010020.2	black	3.4.11.1//3.4.11.5 - Leucyl aminopeptidase / Peptidase S // Prolyl aminopeptidase / Proline iminopeptidase			0.00519823	6.74842e-05		0.00439492
Solyc12g010120.2	black	PTHR10994:SF84 - RETICULON-LIKE PROTEIN B21			0.00158666	0.00217335			0.0212904
Solyc12g013900.2	black	PTHR33021:SF1 - EARLY NODULIN-LIKE PROTEIN 2			4.11245e-05	7.08734e-05		0.00278277	0.000590284
Solyc12g017350.2	black	PTHR11562//PTHR11562:SF52 - CATION EFFLUX PROTEIN/ ZINC TRANSPORTER // SUBFAMILY NOT NAMED			0.0112864	0.0289444
Solyc12g017460.1	black	2.3.1.98 - Chlorogenate--glucarate O-hydroxycinnamoyltransferase	0.0465001		0.0328871	0.000970572		0.0298769
Solyc12g017910.2	black	PTHR30540//PTHR30540:SF9 - OSMOTIC STRESS POTASSIUM TRANSPORTER // POTASSIUM TRANSPORTER 4						0.0219069
Solyc12g019140.2	black	PTHR31375:SF18 - POLYGALACTURONASE-RELATED			0.000145665	0.00110002		0.0150652	0.00165029
Solyc12g035405.1	black				0.0149004	0.0161345	0.00799366	0.00161027	0.000104711
Solyc12g043030.2	black	PTHR11814//PTHR11814:SF85 - SULFATE TRANSPORTER // SULFATE TRANSPORTER 3.4-RELATED			0.0214915				0.00127595
Solyc12g049220.2	black	PTHR15371//PTHR15371:SF7 - TIM23 // SUBFAMILY NOT NAMED	0.0360477			0.0121377
Solyc12g057140.1	black	PTHR36321:SF1 - CLASSICAL ARABINOGALACTAN PROTEIN 10-RELATED			0.0373888	0.0147928		0.0085746
Solyc12g087940.2	black	PTHR13683//PTHR13683:SF259 - ASPARTYL PROTEASES // ASPARTYL PROTEASE-LIKE PROTEIN	0.000797221			0.000142537	0.00429495	0.00479349
Solyc12g088340.2	black	K10570 - DNA excision repair protein ERCC-8 (ERCC8, CKN1, CSA)			0.0219329				0.0091051
Solyc12g094460.2	black	PTHR11709:SF90 - MULTI-COPPER OXIDASE TYPE I FAMILY PROTEIN-RELATED			7.02127e-05	4.0838e-05		0.00113842	0.00201974
Solyc12g094580.2	black				0.013542	0.0101188		0.0030714	0.00601229
Solyc12g096540.2	black	K02947 - small subunit ribosomal protein S10e (RP-S10e, RPS10)	0.0388192			0.0304613		0.035905
Solyc12g096560.2	black	K14641 - apyrase (APY1_2)	0.000661337			6.98013e-05	0.0105744	0.00060201
Solyc12g096620.1	black	2.3.1.98 - Chlorogenate--glucarate O-hydroxycinnamoyltransferase				0.000451224		1.19689e-06
Solyc12g096840.2	black	2.3.1.110 - Tyramine N-feruloyltransferase	0.00454057		0.0469051	5.73455e-05	0.0464351	0.00837525
Solyc12g099000.2	black	PTHR11964:SF16 - S-ADENOSYLMETHIONINE SYNTHASE 4	0.000282635		0.00073573	9.78203e-21	0.00249016	1.75123e-13	0.0144705
Solyc12g099440.2	black	1.1.1.35//4.2.1.17//4.2.1.55//5.1.2.3//5.3.3.8 - 3-hydroxyacyl-CoA dehydrogenase / Beta-keto-reductase // Enoyl-CoA hydratase / Unsaturated acyl-CoA hydratase // 3-hydroxybutyryl-CoA dehydratase / Crotonase // 3-hydroxybutyryl-CoA epimerase // Dodecenoyl-CoA isomerase / Dodecenoyl-CoA Delta-isomerase	0.0205949			0.00834188	0.00411307	0.00405581
Solyc12g099970.2	black	K07199 - 5'-AMP-activated protein kinase, regulatory beta subunit (PRKAB)			0.00116414	0.0136981			0.0221208
Solyc12g099990.2	black	PTHR23050:SF153 - CALMODULIN-1-RELATED				0.00820706
Solyc12g100250.2	black	K10256 - omega-6 fatty acid desaturase (delta-12 desaturase) (FAD2)				0.014606		0.0116066	0.0358736
Solyc12g100260.1	black	1.3.1.35 - Transferred entry: 1.14.19.22	0.00113083			7.08732e-05	0.00883142	0.00147371
ENSRNA050030435	black				4.82372e-06	2.38573e-06		3.62997e-10	5.41949e-05
ENSRNA050030436	black				0.000429476	0.00429802		0.000773509	0.000555969
Solyc00g005000.3	blue	PTHR13683:SF265 - PROTEIN ASPARTIC PROTEASE IN GUARD CELL 2			0.000353464	0.00666615			0.00104398
Solyc00g005050.3	blue	KOG3294 - WW domain binding protein WBP-2, contains GRAM domain			7.55324e-05	0.00116851		0.0127948	0.000953786
Solyc00g005840.3	blue	PTHR10438//PTHR10438:SF227 - THIOREDOXIN // THIOREDOXIN-LIKE 2-1, CHLOROPLASTIC-RELATED			0.000449222	0.00728566			0.00509063
Solyc00g009760.2	blue				0.000294058	7.87845e-06		0.00046945	0.00236551
Solyc00g011150.1	blue				0.0376702	0.0320923			0.0424885
Solyc00g011160.2	blue					0.0420192
Solyc00g013155.1	blue				0.0314861	0.0258029		0.0198581
Solyc00g026160.3	blue	PTHR11972//PTHR11972:SF62 - NADPH OXIDASE // FERRIC REDUCTION OXIDASE 4-RELATED		0.0202091			0.00630871	3.77093e-07	1.11498e-05
Solyc00g050430.3	blue	PF00010 - Helix-loop-helix DNA-binding domain (HLH)			0.0229064	0.0201069
Solyc00g052940.3	blue	PF00892 - EamA-like transporter family (EamA)	0.0299602			0.0031491
Solyc00g063110.3	blue	PTHR33076:SF6 - NON-SPECIFIC LIPID-TRANSFER PROTEIN 15			2.92343e-08	4.33576e-13		4.50323e-10	2.09804e-06
Solyc00g068970.2	blue				0.0172869	0.00243595		0.0294346
Solyc01g005020.3	blue	PTHR10110//PTHR10110:SF86 - SODIUM/HYDROGEN EXCHANGER // SODIUM/HYDROGEN EXCHANGER 7-RELATED			0.00473235	0.0178594		0.0455967	0.00804065
Solyc01g005090.3	blue	PTHR11200//PTHR11200:SF63 - INOSITOL 5-PHOSPHATASE // DNASE I-LIKE SUPERFAMILY PROTEIN			6.0665e-33	2.0297e-30		2.06933e-33	4.93123e-39
Solyc01g005550.3	blue	PF03080//PF14365 - Domain of unknown function (DUF239) (DUF239) // Domain of unknown function (DUF4409) (DUF4409)						0.0407765	0.0154489
Solyc01g006050.2	blue	PTHR16007//PTHR16007:SF29 - EPIDIDYMAL MEMBRANE PROTEIN E9-RELATED // SUBFAMILY NOT NAMED			0.00596564	0.0289444			0.0365212
Solyc01g006100.3	blue	PTHR10629//PTHR10629:SF28 - CYTOSINE-SPECIFIC METHYLTRANSFERASE // DNA (CYTOSINE-5)-METHYLTRANSFERASE CMT3			0.00152853	0.00093918			0.017098
Solyc01g006720.3	blue	PTHR19241//PTHR19241:SF286 - ATP-BINDING CASSETTE TRANSPORTER // SUBFAMILY NOT NAMED			3.10054e-09	1.39202e-12		9.92733e-12	4.06384e-08
Solyc01g006790.2	blue	PTHR33264//PTHR33264:SF5 - FAMILY NOT NAMED // EXPRESSED PROTEIN-RELATED						0.0192589	0.000365601
Solyc01g007100.3	blue	K09480 - digalactosyldiacylglycerol synthase (E2.4.1.241)			1.00538e-06	3.77468e-06		0.00103932	3.13362e-05
Solyc01g007130.3	blue	PF07714//PF08263 - Protein tyrosine kinase (Pkinase_Tyr) // Leucine rich repeat N-terminal domain (LRRNT_2)						0.0345942	0.0136614
Solyc01g007220.3	blue	PTHR31415//PTHR31415:SF2 - FAMILY NOT NAMED // LATE EMBRYOGENESIS ABUNDANT HYDROXYPROLINE-RICH GLYCOPROTEIN-RELATED			0.000417551	0.00277312			0.00580813
Solyc01g007890.2	blue				0.000981132	4.21386e-06		0.000481621	0.0194229
Solyc01g007895.1	blue	PTHR16223//PTHR16223:SF32 - FAMILY NOT NAMED // TRANSCRIPTION FACTOR BHLH111			0.000599332	0.00789137			0.0114825
Solyc01g007900.3	blue	PTHR31142//PTHR31142:SF3 - FAMILY NOT NAMED // PROTEIN TOM THREE HOMOLOG 1-RELATED			0.002577	0.023777			0.0351272
Solyc01g008000.3	blue	K07937//K07977 - ADP-ribosylation factor 1 (ARF1) // Arf/Sar family, other (ARF)			0.00306325	0.0014512		0.0439981	0.0325433
Solyc01g008010.3	blue	PF02713 - Domain of unknown function DUF220 (DUF220)			0.0185086	0.0429768			0.0395635
Solyc01g008030.3	blue				0.0104957				0.047382
Solyc01g008070.3	blue	PF07082 - Protein of unknown function (DUF1350) (DUF1350)			0.00407821	0.0459381
Solyc01g008370.3	blue	K03038 - 26S proteasome regulatory subunit N8 (PSMD7, RPN8)			0.0415877				0.0188198
Solyc01g008440.3	blue	PTHR24349//PTHR24349:SF93 - SERINE/THREONINE-PROTEIN KINASE // CALCIUM-DEPENDENT PROTEIN KINASE 14			0.00967866	0.0158718		0.0402436	0.00611208
Solyc01g008730.3	blue	PTHR22952:SF206 - TRANSCRIPTION FACTOR TGA2			0.000974142	0.0124923			0.00524371
Solyc01g008780.3	blue	3.1.1.4 - Phospholipase A(2) / Phospholipase A2			0.00054342	0.000655795		0.00731481	0.000798221
Solyc01g008960.3	blue	PTHR22891//PTHR22891:SF51 - EUKARYOTIC TRANSLATION INITIATION FACTOR 2C // SUBFAMILY NOT NAMED			3.83666e-10	2.33938e-09		1.24428e-09	7.55419e-09
Solyc01g009040.3	blue	PTHR10177:SF253 - CYCLIN-B1-4			0.000786666	0.00729399			0.0135692
Solyc01g009500.3	blue	PTHR10992//PTHR10992:SF774 - ALPHA/BETA HYDROLASE FOLD-CONTAINING PROTEIN // ALPHA/BETA-HYDROLASES SUPERFAMILY PROTEIN-RELATED						0.0486413	0.0135616
Solyc01g009780.3	blue	K19363 - lipopolysaccharide-induced tumor necrosis factor-alpha factor (LITAF)			0.0149046	7.81861e-05		0.0117744
Solyc01g010640.3	blue	PTHR35688:SF2 - NAD(P)-LINKED OXIDOREDUCTASE-LIKE PROTEIN			9.35595e-19	2.23609e-45		8.94532e-32	3.34977e-16
Solyc01g010750.3	blue	PF14200 - Ricin-type beta-trefoil lectin domain-like (RicinB_lectin_2)			1.475e-08	7.88836e-09		3.57213e-14	4.29411e-10
Solyc01g014140.3	blue							0.0200782	0.0126449
Solyc01g028900.3	blue	K00167 - 2-oxoisovalerate dehydrogenase E1 component beta subunit (BCKDHB, bkdA2)			0.00270584	0.0133967			0.0244529
Solyc01g056625.1	blue	PTHR10910//PTHR10910:SF95 - EUKARYOTE SPECIFIC DSRNA BINDING PROTEIN // DOUBLE-STRANDED RNA-BINDING PROTEIN 4			0.0156172	0.00341217		0.011647	0.00927147
Solyc01g056810.3	blue	PTHR19957//PTHR19957:SF131 - SYNTAXIN // SUBFAMILY NOT NAMED			0.010153	0.0205042
Solyc01g057210.3	blue	2.7.11.2 - [Pyruvate dehydrogenase (acetyl-transferring)] kinase / Pyruvate dehydrogenase kinase (phosphorylating)			0.000189912	0.000822471		0.0300427	0.00131871
Solyc01g057310.3	blue	K10400 - kinesin family member 15 (KIF15)			0.0018463	0.0113001			0.023815
Solyc01g058140.3	blue	PTHR10353//PTHR10353:SF33 - GLYCOSYL HYDROLASE // BETA-GLUCOSIDASE-LIKE SFR2, CHLOROPLASTIC				0.000746373
Solyc01g058260.3	blue	PTHR10682//PTHR10682:SF20 - POLY A POLYMERASE // POLY(A) POLYMERASE			0.00220102	0.0192557			0.0027152
Solyc01g059870.3	blue				0.00539421	0.0121515
Solyc01g060140.3	blue	PTHR23335//PTHR23335:SF3 - CALMODULIN-BINDING TRANSCRIPTION ACTIVATOR CAMTA // CALMODULIN-BINDING TRANSCRIPTION ACTIVATOR 5-RELATED			5.44261e-05	2.33788e-06		0.0011366	0.00158212
Solyc01g065495.1	blue	PTHR11732//PTHR11732:SF12 - ALDO/KETO REDUCTASE // ALDO-KETO REDUCTASE 1-RELATED			0.00174872	0.000688604		0.0293678	0.0176783
Solyc01g065700.3	blue	PTHR13832//PTHR13832:SF310 - PROTEIN PHOSPHATASE 2C // PROTEIN PHOSPHATASE 2C 41-RELATED			6.62042e-28	6.30119e-39		3.55688e-33	2.26569e-24
Solyc01g066450.3	blue	PTHR10992:SF829 - ALPHA/BETA-HYDROLASES SUPERFAMILY PROTEIN							0.0223845
Solyc01g066590.3	blue	K10418 - dynein light chain LC8-type (DYNLL)			4.33866e-07	1.63385e-06		0.000168851	9.74731e-06
Solyc01g067380.3	blue	PTHR21493:SF101 - ALPHA/BETA-HYDROLASES SUPERFAMILY PROTEIN			0.0168105				0.0338716
Solyc01g067570.3	blue					0.00136507
Solyc01g067660.3	blue	PTHR31352//PTHR31352:SF3 - FAMILY NOT NAMED // INACTIVE BETA-AMYLASE 9			2.87674e-27	2.16027e-24		6.08545e-21	1.2854e-26
Solyc01g068060.3	blue	PTHR10969:SF25 - AUTOPHAGY-RELATED PROTEIN 8I			0.00174557	0.00247275		0.0242523	0.0242993
Solyc01g068100.3	blue	PTHR31251//PTHR31251:SF8 - FAMILY NOT NAMED // SQUAMOSA PROMOTER-BINDING-LIKE PROTEIN 1-RELATED			0.00508402	0.013825			0.0464486
Solyc01g068210.3	blue	1.4.1.4 - Glutamate dehydrogenase (NADP(+)) / Glutamic dehydrogenase				0.00256858
Solyc01g068410.3	blue	PTHR31752//PTHR31752:SF2 - FAMILY NOT NAMED // AUXIN EFFLUX CARRIER COMPONENT 8-RELATED			3.20798e-23	2.69344e-20		2.73783e-22	1.30588e-31
Solyc01g068490.3	blue	K08332 - vacuolar protein 8 (VAC8)			6.75323e-05	0.00146725		0.00283548	8.27145e-05
Solyc01g068590.3	blue	PTHR23339//PTHR23339:SF54 - TYROSINE SPECIFIC PROTEIN PHOSPHATASE AND DUAL SPECIFICITY PROTEIN PHOSPHATASE // PALADIN			3.76576e-10	1.80786e-11		6.96382e-21	1.79711e-14
Solyc01g073650.3	blue	PTHR11668//PTHR11668:SF247 - SERINE/THREONINE PROTEIN PHOSPHATASE // SUBFAMILY NOT NAMED			0.00622361	0.0281222
Solyc01g073680.3	blue	PTHR33044:SF28 - BIFUNCTIONAL INHIBITOR/LIPID-TRANSFER PROTEIN/SEED STORAGE 2S ALBUMIN SUPERFAMILY PROTEIN			1.0481e-08	8.87114e-20		7.80034e-21	1.67424e-08
Solyc01g079090.3	blue	K00231 - oxygen-dependent protoporphyrinogen oxidase (PPOX, hemY)			0.000212769	0.00308263		0.0373692	0.000737376
Solyc01g079100.3	blue	PTHR22883:SF53 - PROTEIN S-ACYLTRANSFERASE 18			0.00782969	0.030039
Solyc01g079150.3	blue	PTHR11453:SF44 - BORON TRANSPORTER 1-RELATED			5.35531e-10	2.16153e-08		7.93246e-24	1.59552e-24
Solyc01g079590.3	blue	PTHR23241//PTHR23241:SF55 - LATE EMBRYOGENESIS ABUNDANT PLANTS LEA-RELATED // SUBFAMILY NOT NAMED			2.74018e-16	7.37283e-15		3.77166e-12	3.39045e-14
Solyc01g079750.3	blue	PTHR24361//PTHR24361:SF315 - MITOGEN-ACTIVATED KINASE KINASE KINASE // MAP KINASE KINASE KINASE SSK2-RELATED			0.000919155	0.000457801		0.00381575	0.0120363
Solyc01g080010.2	blue	PTHR13683//PTHR13683:SF268 - ASPARTYL PROTEASES // EUKARYOTIC ASPARTYL PROTEASE FAMILY PROTEIN			2.21556e-11	2.56059e-16		4.5996e-18	1.2479e-12
Solyc01g080230.3	blue	PTHR17630//PTHR17630:SF48 - DIENELACTONE HYDROLASE // DIENELACTONE HYDROLASE-LIKE PROTEIN			6.81539e-05	7.42465e-08		2.0928e-07	0.000107264
Solyc01g080670.3	blue	PTHR31251:SF2 - SQUAMOSA PROMOTER-BINDING-LIKE PROTEIN 7			0.00451063	0.000776498			0.0330868
Solyc01g080690.3	blue	K11801 - WD repeat-containing protein 23 (WDR23)				0.0326489
Solyc01g080960.3	blue	PTHR31100:SF14 - AT-HOOK MOTIF NUCLEAR LOCALIZED PROTEIN 21-RELATED			0.0324536	2.18463e-05		0.00463984
Solyc01g081177.1	blue	PTHR11639//PTHR11639:SF62 - S100 CALCIUM-BINDING PROTEIN // SUBFAMILY NOT NAMED			0.000366078	5.8557e-06		0.00102574	0.00300986
Solyc01g081310.3	blue	PTHR11260//PTHR11260:SF307 - GLUTATHIONE S-TRANSFERASE, GST, SUPERFAMILY, GST DOMAIN CONTAINING // SUBFAMILY NOT NAMED			0.0390382	0.0126041
Solyc01g081380.3	blue	PTHR14352:SF2 - HAUS AUGMIN-LIKE COMPLEX SUBUNIT 7			0.00133481	0.0190873			0.0185178
Solyc01g081540.3	blue	PTHR13140:SF270 - MYOSIN-12			0.0385558			0.0431998	0.00432072
Solyc01g086640.2	blue	PTHR31741//PTHR31741:SF11 - FAMILY NOT NAMED // AXI 1 PROTEIN-LIKE PROTEIN			0.0003112	0.00106632		0.00509064	0.000426765
Solyc01g086810.2	blue	PTHR23155//PTHR23155:SF633 - LEUCINE-RICH REPEAT-CONTAINING PROTEIN // SUBFAMILY NOT NAMED			0.00088116	0.014528			0.0139675
Solyc01g086890.3	blue	K13096 - splicing factor 4 (SF4)			0.00170551	0.00960776			0.0351272
Solyc01g086900.3	blue	2.1.1.207 - tRNA (cytidine(34)-2'-O)-methyltransferase / tRNA methyltransferase L			0.0250115	0.0469026
Solyc01g087140.3	blue				0.00101593	0.014528			0.00490493
Solyc01g087150.3	blue	PTHR11206:SF156 - MATE EFFLUX FAMILY PROTEIN FRD3			4.60372e-06	3.83566e-05		5.43767e-05	3.73513e-07
Solyc01g087250.3	blue	K11159 - carotenoid cleavage dioxygenase (K11159)			0.00055178	0.00043624			0.0187024
Solyc01g087850.2	blue	PTHR10795//PTHR10795:SF446 - PROPROTEIN CONVERTASE SUBTILISIN/KEXIN // SUBFAMILY NOT NAMED			7.71892e-05	9.75918e-07		2.44559e-08	7.7689e-05
Solyc01g088100.3	blue	PTHR24009:SF3 - RNA RECOGNITION MOTIF-CONTAINING PROTEIN-RELATED			0.0215984	0.00136501
Solyc01g088650.3	blue	2.4.1.265 - Dolichyl-P-Glc:Glc(1)Man(9)GlcNAc(2)-PP-dolichol alpha-1,3- glucosyltransferase / Dol-P-Glc:Glc(1)Man(9)GlcNAc(2)-PP-Dol alpha-1->3-glucosyltransferase			0.00146659	0.00255888		0.017744	0.00346446
Solyc01g089850.3	blue	PTHR15615:SF28 - CYCLIN-U4-1			0.00698256	0.024489		0.0211035	0.00988333
Solyc01g090040.3	blue				0.0108232	0.0459381		0.0259509	0.0189606
Solyc01g090550.3	blue	K09503 - DnaJ homolog subfamily A member 2 (DNAJA2)			0.00298433	0.000220227		0.0329778	0.0465871
Solyc01g090610.3	blue	PTHR10209//PTHR10209:SF174 - OXIDOREDUCTASE, 2OG-FE II OXYGENASE FAMILY PROTEIN // 2-OXOGLUTARATE (2OG) AND FE(II)-DEPENDENT OXYGENASE SUPERFAMILY PROTEIN-RELATED			5.96168e-05	4.26241e-05		2.83289e-10	4.25627e-08
Solyc01g090760.3	blue	PTHR10071//PTHR10071:SF161 - TRANSCRIPTION FACTOR GATA GATA BINDING FACTOR // SUBFAMILY NOT NAMED			0.0167096	0.00125643		0.0152058
Solyc01g090880.3	blue	PTHR33317:SF2 - HOLLIDAY JUNCTION RESOLVASE-RELATED			1.12646e-05	0.000310712		0.0177943	0.000165064
Solyc01g091260.3	blue	PTHR13105//PTHR13105:SF8 - MYELOID LEUKEMIA FACTOR // SUBFAMILY NOT NAMED			4.70075e-09	3.52813e-08		1.39805e-05	1.74442e-07
Solyc01g091630.3	blue	KOG0483//KOG0484 - Transcription factor HEX, contains HOX and HALZ domains // Transcription factor PHOX2/ARIX, contains HOX domain			0.0121525				0.0293982
Solyc01g091705.1	blue	PTHR23105//PTHR23105:SF57 - RIBOSOMAL PROTEIN L7AE FAMILY MEMBER // SUBFAMILY NOT NAMED			2.36314e-07	4.1042e-06		0.000253099	2.01677e-06
Solyc01g094220.3	blue	K15095 - (+)-neomenthol dehydrogenase (E1.1.1.208)			1.8433e-06	4.31125e-05		0.000185768	6.64103e-06
Solyc01g094690.3	blue	PTHR19139//PTHR19139:SF169 - AQUAPORIN TRANSPORTER // AQUAPORIN PIP1-4-RELATED			3.77784e-20	9.8088e-27		8.13994e-25	1.36054e-18
Solyc01g094700.3	blue	PTHR15486:SF27 - GLYCEROL-3-PHOSPHATE 2-O-ACYLTRANSFERASE 4-RELATED			0.0149821				0.00886113
Solyc01g094860.3	blue	PTHR14319//PTHR14319:SF3 - FIVE-SPAN TRANSMEMBRANE PROTEIN M83 // SUBFAMILY NOT NAMED				0.0211666
Solyc01g094910.3	blue	PF00175//PF01794//PF08022 - Oxidoreductase NAD-binding domain (NAD_binding_1) // Ferric reductase like transmembrane component (Ferric_reduct) // FAD-binding domain (FAD_binding_8)			4.14617e-15	4.17575e-13		1.63021e-12	1.25033e-12
Solyc01g095030.3	blue	PTHR12802//PTHR12802:SF48 - SWI/SNF COMPLEX-RELATED // SUBFAMILY NOT NAMED			5.77625e-30	2.19096e-43		2.33709e-32	4.05313e-27
Solyc01g095370.3	blue	PTHR10706//PTHR10706:SF127 - F-BOX FAMILY PROTEIN // SUBFAMILY NOT NAMED			0.00703599	0.0392995
Solyc01g095530.2	blue	PTHR33513//PTHR33513:SF4 - FAMILY NOT NAMED // GB|AAF04428.1			2.27698e-17	5.75436e-26		1.16399e-47	1.93223e-20
Solyc01g095560.3	blue				0.00270826	0.0231338			0.0223315
Solyc01g095580.3	blue	PTHR31901:SF3 - JASMONIC ACID-AMIDO SYNTHETASE JAR1			0.015569				0.045858
Solyc01g095630.3	blue	PF03106 - WRKY DNA -binding domain (WRKY)			0.00435657	0.00519469		0.0373754	0.0172006
Solyc01g095790.3	blue	PTHR12786//PTHR12786:SF1 - SPLICING FACTOR SF3A-RELATED // PROTEIN SDE2 HOMOLOG			0.00127302	0.0113831		0.0120829	0.0063702
Solyc01g096140.3	blue	PTHR31086:SF4 - ALUMINUM-ACTIVATED MALATE TRANSPORTER 10		0.0141784	0.00230187			2.69667e-17	2.66875e-23
Solyc01g096180.3	blue	K12893 - splicing factor, arginine/serine-rich 4/5/6 (SFRS4_5_6)						0.040851
Solyc01g096360.3	blue	PTHR23177:SF24 - RHO GTPASE-ACTIVATING PROTEIN 3-RELATED			0.00261696	0.0315834			0.0329787
Solyc01g096630.3	blue				4.61785e-27	3.145e-24		3.11756e-20	1.01584e-25
Solyc01g096740.3	blue	KOG2615 - Permease of the major facilitator superfamily			0.00932325	0.0105121
Solyc01g097120.3	blue	PTHR31358//PTHR31358:SF4 - FAMILY NOT NAMED // PROTEIN WAVE-DAMPENED 2-RELATED			0.00185705	0.000666266		0.0463989	0.0367331
Solyc01g097340.3	blue	5.1.3.18 - GDP-mannose 3,5-epimerase			1.74505e-09	2.17237e-09		1.44924e-09	3.57719e-10
Solyc01g097570.2	blue				0.000437789	1.04008e-05		0.000413613	0.00501237
Solyc01g097980.3	blue	PTHR23257//PTHR23257:SF440 - SERINE-THREONINE PROTEIN KINASE // SUBFAMILY NOT NAMED	0.0487694			4.16046e-05		0.00216053
Solyc01g098140.3	blue	PF07859//PF10340 - alpha/beta hydrolase fold (Abhydrolase_3) // Protein of unknown function (DUF2424) (DUF2424)			0.00202868	0.014649			0.0293843
Solyc01g098430.3	blue	PTHR13268//PTHR13268:SF0 - BREAST CARCINOMA AMPLIFIED SEQUENCE 3 // BREAST CARCINOMA-AMPLIFIED SEQUENCE 3			0.0011845	0.00194586		0.0415431	0.0144725
Solyc01g098500.3	blue	K08145 - MFS transporter, SP family, solute carrier family 2 (facilitated glucose transporter), member 8 (SLC2A8, GLUT8)				0.0229736
Solyc01g099090.3	blue	3.2.1.152 - Mannosylglycoprotein endo-beta-mannosidase / Endo-beta-mannosidase			0.00847901	0.0181031
Solyc01g099400.3	blue	PTHR11227//PTHR11227:SF18 - WD-REPEAT PROTEIN INTERACTING WITH PHOSPHOINOSIDES WIPI -RELATED // WD REPEAT DOMAIN PHOSPHOINOSITIDE-INTERACTING PROTEIN 3			0.00759916	0.00388521		0.0295924	0.0369181
Solyc01g099920.3	blue	PTHR33649//PTHR33649:SF4 - FAMILY NOT NAMED // PAR1 PROTEIN						0.0230581
Solyc01g099970.3	blue	PTHR24006//PTHR24006:SF442 - FAMILY NOT NAMED // PROTEIN GADR-4			0.0229721	0.0341423
Solyc01g100040.3	blue	PTHR13832//PTHR13832:SF198 - PROTEIN PHOSPHATASE 2C // PROTEIN PHOSPHATASE 2C 34-RELATED	6.61905e-05		1.37457e-05	5.53149e-74	0.00117421	1.41039e-71	0.000405241
Solyc01g100850.3	blue	PTHR12847//PTHR12847:SF5 - ATP-BINDING CASSETTE ABC TRANSPORTER-RELATED // CCR4-ASSOCIATED FACTOR 16			1.62009e-10	1.97659e-11		2.5494e-08	4.10471e-08
Solyc01g100960.3	blue	PTHR23429//PTHR23429:SF4 - GLUCOSE-6-PHOSPHATE 1-DEHYDROGENASE G6PD // GLUCOSE-6-PHOSPHATE 1-DEHYDROGENASE 4, CHLOROPLASTIC			0.00245622	0.0215946			0.0283289
Solyc01g100970.3	blue	3.4.19.3 - Pyroglutamyl-peptidase I / Pyrrolidone-carboxylate peptidase			2.87394e-27	1.19668e-35		1.42623e-31	4.98909e-25
Solyc01g101040.3	blue	2.3.3.8 - ATP citrate synthase / Citric cleavage enzyme				0.0369241
Solyc01g101060.3	blue	PTHR11964:SF16 - S-ADENOSYLMETHIONINE SYNTHASE 4			1.9119e-09	1.73988e-15		9.97828e-17	6.65282e-07
Solyc01g101100.3	blue	2.7.11.1 - Non-specific serine/threonine protein kinase / Threonine-specific protein kinase				0.0103194
Solyc01g101250.3	blue	PTHR17614 - ZINC FINGER-CONTAINING			6.33732e-17	5.27066e-20		1.30176e-19	2.10939e-17
Solyc01g102880.2	blue	PF00931//PF13191//PF13676 - NB-ARC domain (NB-ARC) // AAA ATPase domain (AAA_16) // TIR domain (TIR_2)			0.000288475	9.1197e-07		2.50767e-07	0.00263296
Solyc01g102970.3	blue	PTHR24012//PTHR24012:SF358 - FAMILY NOT NAMED // PROTEIN EMBRYO DEFECTIVE 140			0.0363795			0.0322274
Solyc01g103030.3	blue	PTHR11654:SF177 - PROTEIN NRT1/ PTR FAMILY 4.3			0.0362674	0.0164652
Solyc01g103370.3	blue	K07874 - Ras-related protein Rab-1A (RAB1A)			0.00596802	0.00349572			0.0457809
Solyc01g103780.3	blue	PF03634 - TCP family transcription factor (TCP)			0.000128962	3.80476e-05		0.000314042	0.000568331
Solyc01g104015.1	blue	PF06232 - Embryo-specific protein 3, (ATS3) (ATS3)			0.000165625	0.000726899		5.1279e-05	6.31713e-05
Solyc01g104080.3	blue	PF05875 - Ceramidase (Ceramidase)				0.0257334
Solyc01g104775.1	blue	PTHR11937//PTHR11937:SF247 - ACTIN // SUBFAMILY NOT NAMED			0.0149338			0.00669936	0.000310579
Solyc01g105120.3	blue	PTHR33334//PTHR33334:SF5 - FAMILY NOT NAMED // DENTIN SIALOPHOSPHOPROTEIN-LIKE PROTEIN			7.73487e-32	1.01948e-36		3.46825e-42	4.95559e-38
Solyc01g105180.3	blue	PF12315 - Protein of unknown function (DUF3633) (DUF3633)			0.000117366	0.00146383		0.0156246	0.000690356
Solyc01g105370.3	blue	PF00005//PF01070//PF01474 - ABC transporter (ABC_tran) // FMN-dependent dehydrogenase (FMN_dh) // Class-II DAHP synthetase family (DAHP_synth_2)			0.00100669	9.17431e-05		3.2748e-05	0.0165239
Solyc01g105420.3	blue	2.5.1.54 - 3-deoxy-7-phosphoheptulonate synthase / Phospho-2-oxo-3-deoxyheptonate aldolase			0.000322524	0.000325407		0.00347616	0.00491789
Solyc01g105650.3	blue	PTHR10209//PTHR10209:SF167 - OXIDOREDUCTASE, 2OG-FE II OXYGENASE FAMILY PROTEIN // SUBFAMILY NOT NAMED			0.0205655	0.033824			0.020303
Solyc01g105880.3	blue				0.0228056	0.0434741
Solyc01g106010.3	blue	PTHR11556//PTHR11556:SF12 - FRUCTOSE-1,6-BISPHOSPHATASE-RELATED // SUBFAMILY NOT NAMED				0.0410245
Solyc01g106340.3	blue	3.5.1.60//3.5.1.99 - N-(long-chain-acyl)ethanolamine deacylase / N-acylethanolamine amidohydrolase // Fatty acid amide hydrolase / Oleamide hydrolase				0.0372769
Solyc01g106430.3	blue	PTHR10286:SF3 - INORGANIC PYROPHOSPHATASE			0.00112392	6.42978e-05		0.00337104	0.017323
Solyc01g106570.3	blue	PTHR12064//PTHR12064:SF30 - ANCIENT CONSERVED DOMAIN PROTEIN-RELATED // SUBFAMILY NOT NAMED			0.000679504	4.61846e-08		2.29407e-06	0.00359217
Solyc01g106900.3	blue	PTHR13890:SF4 - MAGNESIUM TRANSPORTER MRS2-3			0.0379611	0.0035192
Solyc01g107340.3	blue				0.00173319	0.00625786		0.000414349	0.00174497
Solyc01g107650.3	blue	PTHR27008:SF42 - LEUCINE-RICH REPEAT PROTEIN KINASE-LIKE PROTEIN			0.0025927	0.0126259			0.0317934
Solyc01g107730.3	blue	PTHR10177:SF251 - CYCLIN-D3-1			0.000237163	1.37764e-05		0.00127153	0.00447128
Solyc01g107790.2	blue				0.0142206	0.0193644		0.00376952	0.0053164
Solyc01g107800.3	blue	PF04669 - Polysaccharide biosynthesis (Polysacc_synt_4)			1.24268e-05	0.000118825		0.000281036	1.1127e-05
Solyc01g107890.3	blue	PTHR31580:SF3 - FILAMENT-LIKE PLANT PROTEIN 7			0.000824758	0.00795995		0.0109599	0.000249796
Solyc01g108560.3	blue				3.03161e-05	1.08156e-05		0.000148217	8.40755e-05
Solyc01g108670.3	blue	PTHR24115//PTHR24115:SF506 - FAMILY NOT NAMED // PHRAGMOPLAST ORIENTING KINESIN 2			0.00417768	0.00712588			0.0269341
Solyc01g108740.3	blue	PTHR10992//PTHR10992:SF805 - ALPHA/BETA HYDROLASE FOLD-CONTAINING PROTEIN // SUBFAMILY NOT NAMED			7.22748e-09	9.4061e-09		1.21122e-08	4.544e-08
Solyc01g109310.3	blue	PTHR11206//PTHR11206:SF181 - MULTIDRUG RESISTANCE PROTEIN // SUBFAMILY NOT NAMED			0.000175738	0.000229053		0.0259731	0.00392182
Solyc01g109340.3	blue	PTHR12313//PTHR12313:SF12 - RNF5 // RING ZINC FINGER PROTEIN-RELATED			0.0075235			0.0499041	0.0302059
Solyc01g109510.3	blue	PTHR12802//PTHR12802:SF39 - SWI/SNF COMPLEX-RELATED // SWI/SNF COMPLEX SUBUNIT SWI3D			0.0136234			0.0199908	0.00899727
Solyc01g110120.3	blue	PTHR11629//PTHR11629:SF69 - VACUOLAR PROTON ATPASES // SUBFAMILY NOT NAMED			0.00233815	2.4929e-06		8.51378e-05	0.0199558
Solyc01g110370.3	blue	PTHR31832//PTHR31832:SF5 - FAMILY NOT NAMED // B-BOX TYPE ZINC FINGER-CONTAINING PROTEIN			8.86249e-15	1.22352e-16		1.1961e-10	5.49714e-12
Solyc01g110380.3	blue	PTHR24115//PTHR24115:SF405 - FAMILY NOT NAMED // ATP BINDING MICROTUBULE MOTOR FAMILY PROTEIN			0.0331052	0.0207168
Solyc01g111190.3	blue	KOG2922 - Uncharacterized conserved protein			0.000385358	0.00411254			0.00599299
Solyc01g111500.3	blue	PTHR10641//PTHR10641:SF588 - MYB-LIKE DNA-BINDING PROTEIN MYB // TRANSCRIPTION REPRESSOR MYB4			3.00303e-07	2.45602e-07		3.49292e-08	2.83804e-08
Solyc01g111510.3	blue	PTHR31356//PTHR31356:SF9 - FAMILY NOT NAMED // L-ASCORBATE PEROXIDASE 3, PEROXISOMAL			2.11931e-06	1.31943e-05		0.000201884	9.28041e-06
Solyc01g111570.3	blue	PTHR27001:SF235 - ADENINE NUCLEOTIDE ALPHA HYDROLASES-DOMAIN CONTAINING PROTEIN KINASE-RELATED			0.0136066	0.0166705		3.71863e-07	1.04819e-06
Solyc01g111660.3	blue	PTHR19139//PTHR19139:SF152 - AQUAPORIN TRANSPORTER // AQUAPORIN PIP2-7			1.47549e-05	5.80272e-05		1.70138e-09	1.09438e-05
Solyc01g111990.3	blue	PTHR11777:SF14 - ALANINE--TRNA LIGASE, CHLOROPLASTIC-RELATED				0.00222426
Solyc01g112080.3	blue	PTHR33734:SF5 - LYSM DOMAIN-CONTAINING GPI-ANCHORED PROTEIN 2			7.20618e-10	3.2143e-10		1.66566e-10	9.45873e-11
Solyc01g112170.3	blue	PTHR10183//PTHR10183:SF323 - CALPAIN // SUBFAMILY NOT NAMED			0.0284192	0.0027971
Solyc01g112260.3	blue				4.44822e-06	3.89231e-09		5.22009e-10	0.000118088
Solyc01g112280.3	blue	3.5.1.14 - N-acyl-aliphatic-L-amino acid amidohydrolase / N-acyl-L-amino-acid amidohydrolase			4.49084e-10	3.31985e-08		3.50175e-05	1.61014e-07
Solyc02g005180.3	blue	PTHR23500:SF62 - SUGAR TRANSPORTER ERD6-LIKE 14-RELATED			8.81067e-06	8.89825e-05		2.4988e-05	1.99231e-07
Solyc02g005200.3	blue	PTHR34556:SF2 - F17A17.35 PROTEIN	0.00170805			1.24816e-05	0.0179116	0.00299014
Solyc02g014150.3	blue	PTHR32010:SF6 - PHOTOSYSTEM II STABILITY/ASSEMBLY FACTOR HCF136, CHLOROPLASTIC			0.00230815	0.00016987		0.00682343	0.0259625
Solyc02g014460.3	blue	KOG4328 - WD40 protein	0.0425303		4.587e-05	9.13941e-15		3.21318e-09	0.000995842
Solyc02g020910.3	blue	PTHR13140:SF384 - MYOSIN-2			0.00438449	0.00705003
Solyc02g020980.3	blue	PTHR32518:SF3 - 4-ALPHA-GLUCANOTRANSFERASE DPE2			0.0104521	0.00106148
Solyc02g021590.3	blue	PTHR27001:SF83 - LRR RECEPTOR-LIKE SERINE/THREONINE-PROTEIN KINASE MRH1-RELATED			5.71297e-05	4.44824e-05		0.00812351	0.000541236
Solyc02g022880.1	blue				0.0472612	0.0282355
Solyc02g023980.3	blue	PTHR12862:SF6 - ACTIN-LIKE ATPASE SUPERFAMILY PROTEIN							0.0170163
Solyc02g030300.3	blue	PF00954//PF01453//PF07714//PF08276 - S-locus glycoprotein domain (S_locus_glycop) // D-mannose binding lectin (B_lectin) // Protein tyrosine kinase (Pkinase_Tyr) // PAN-like domain (PAN_2)			0.00669208	7.71029e-05		0.0115268	0.0466855
Solyc02g031840.3	blue	PTHR30540//PTHR30540:SF11 - OSMOTIC STRESS POTASSIUM TRANSPORTER // POTASSIUM TRANSPORTER 10-RELATED			2.21189e-05	0.000310712		0.00861412	0.000575181
Solyc02g032030.1	blue	PTHR21495//PTHR21495:SF67 - NUCLEOPORIN-RELATED // SUBFAMILY NOT NAMED			5.65286e-06	3.39077e-07		1.6504e-16	1.41785e-07
Solyc02g032850.3	blue	PTHR21493//PTHR21493:SF130 - CGI-141-RELATED/LIPASE CONTAINING PROTEIN // SUBFAMILY NOT NAMED				0.0437008
Solyc02g036370.3	blue	PTHR12802//PTHR12802:SF60 - SWI/SNF COMPLEX-RELATED // PROTEIN REVEILLE 1-RELATED					0.044199	5.46644e-05	0.000676969
Solyc02g036380.3	blue	K08339 - autophagy-related protein 5 (ATG5)			0.00402004	0.0020838			0.0252481
Solyc02g037495.1	blue	PTHR24095//PTHR24095:SF177 - FAMILY NOT NAMED // ACYL-ACTIVATING ENZYME 5, PEROXISOMAL-RELATED					0.0227028
Solyc02g037530.3	blue	PTHR31384:SF2 - AUXIN RESPONSE FACTOR 8			0.00122928	0.000577353		0.00928652	0.00777889
Solyc02g062610.3	blue	PTHR10992//PTHR10992:SF701 - ALPHA/BETA HYDROLASE FOLD-CONTAINING PROTEIN // SERINE HYDROLASE-RELATED			7.72668e-05	0.000123077		0.00590106	0.000940966
Solyc02g062950.3	blue	PTHR22952//PTHR22952:SF123 - CAMP-RESPONSE ELEMENT BINDING PROTEIN-RELATED // G-BOX-BINDING FACTOR 1			1.12641e-05	3.44112e-07		0.000460729	0.000558776
Solyc02g062970.3	blue	3.4.11.9 - Xaa-Pro aminopeptidase / X-Pro aminopeptidase			6.97083e-07	4.94682e-07		6.22398e-05	4.89214e-05
Solyc02g063330.3	blue	PTHR27001//PTHR27001:SF52 - FAMILY NOT NAMED // PROTEIN KINASE FAMILY PROTEIN-RELATED			0.00246525	0.0317047		0.00326053	0.0028613
Solyc02g063440.3	blue	PF12734 - Cysteine-rich TM module stress tolerance (CYSTM)			0.0282402	0.000226791		0.0173631
Solyc02g064730.3	blue	PF04419//PF12907 - 4F5 protein family (4F5) // Zinc-binding (zf-met2)			7.15791e-07	1.00042e-05		6.68901e-09	7.31278e-07
Solyc02g065110.3	blue	PTHR24361:SF300 - MITOGEN-ACTIVATED PROTEIN KINASE KINASE KINASE 5			0.000201376	0.00369343			0.00627655
Solyc02g065190.3	blue	1.14.13.152 - Geraniol 8-hydroxylase / G10H			7.22365e-06	6.05169e-10		5.59741e-08	2.54638e-05
Solyc02g065380.3	blue	PTHR33596//PTHR33596:SF1 - FAMILY NOT NAMED // COLD-REGULATED 413 PLASMA MEMBRANE PROTEIN 1-RELATED				0.0335645
Solyc02g065680.3	blue	K14207 - solute carrier family 38 (sodium-coupled neutral amino acid transporter), member 2 (SLC38A2, SNAT2)			1.13735e-106	5.43098e-115		8.65593e-203	1.71632e-187
Solyc02g065700.3	blue	PTHR12277//PTHR12277:SF42 - UNCHARACTERIZED // ALPHA/BETA-HYDROLASES SUPERFAMILY PROTEIN-RELATED			0.019327	0.0437163
Solyc02g065770.3	blue	PF04833 - COBRA-like protein (COBRA)			0.0367275			3.47541e-07	0.00559048
Solyc02g067120.3	blue	PF09366 - Protein of unknown function (DUF1997) (DUF1997)			2.69564e-05	1.23243e-05		5.54322e-06	5.69513e-06
Solyc02g067230.3	blue	PTHR31089//PTHR31089:SF1 - FAMILY NOT NAMED // CYCLIC DOF FACTOR 4-RELATED			9.30045e-07	7.95224e-10		3.66215e-06	5.40747e-05
Solyc02g068380.3	blue	3.5.3.9 - Allantoate deiminase			0.0415877	4.31011e-05		0.0239771
Solyc02g068430.3	blue	2.7.7.15 - Choline-phosphate cytidylyltransferase / Phosphorylcholine transferase			0.000237903	0.000308954		0.00667619	0.00128387
Solyc02g068877.1	blue	PTHR31279//PTHR31279:SF4 - FAMILY NOT NAMED // EXORDIUM LIKE 7			8.3895e-05	0.000617068		0.00773928	0.00163162
Solyc02g069160.3	blue	K14407 - cleavage stimulation factor subunit 2 (CSTF2, RNA15)			0.0252926	5.27166e-05		0.000310535
Solyc02g069620.3	blue	PTHR11934//PTHR11934:SF8 - RIBOSE-5-PHOSPHATE ISOMERASE // RIBOSE-5-PHOSPHATE ISOMERASE 4, CHLOROPLASTIC-RELATED			8.10342e-05	0.000766206		0.04807	0.00171642
Solyc02g069630.3	blue	PTHR10795:SF439 - SERINE PROTEINASE-RELATED			7.38006e-16	6.25262e-15		3.92169e-11	9.43222e-13
Solyc02g070040.1	blue	PTHR36381:SF1 - ETHYLENE-REGULATED NUCLEAR PROTEIN ERT2-LIKE PROTEIN-RELATED			0.00312654	0.00978351			0.0127776
Solyc02g070260.3	blue	PTHR24365//PTHR24365:SF274 - TOLL-LIKE RECEPTOR // SUBFAMILY NOT NAMED			8.63026e-19	6.20225e-17		1.33614e-13	1.96652e-16
Solyc02g070550.3	blue	PTHR22792//PTHR22792:SF58 - LUPUS LA PROTEIN-RELATED // LA-RELATED PROTEIN 6A			1.31983e-05	2.9352e-05		0.00229204	0.000276375
Solyc02g071140.3	blue	KOG1418 - Tandem pore domain K+ channel				0.0330938
Solyc02g071520.3	blue	PTHR10791//PTHR10791:SF23 - RAG1-ACTIVATING PROTEIN 1 // SUBFAMILY NOT NAMED			0.00226878	0.00178002		0.0167604	0.0110604
Solyc02g071560.3	blue	PTHR10795//PTHR10795:SF427 - PROPROTEIN CONVERTASE SUBTILISIN/KEXIN // SUBFAMILY NOT NAMED			0.010989	1.04048e-07		8.58324e-12	0.0236002
Solyc02g071700.3	blue	PTHR22835//PTHR22835:SF177 - ZINC FINGER FYVE DOMAIN CONTAINING PROTEIN // SUBFAMILY NOT NAMED				0.0471769
Solyc02g071750.3	blue	PTHR28141//PTHR28141:SF1 - FAMILY NOT NAMED // 2',3'-CYCLIC-NUCLEOTIDE 3'-PHOSPHODIESTERASE				0.0268315
Solyc02g072220.1	blue	PF07939 - Protein of unknown function (DUF1685) (DUF1685)			0.0152379	0.00126484		0.0468526
Solyc02g072530.2	blue	PTHR24347//PTHR24347:SF168 - SERINE/THREONINE-PROTEIN KINASE // CBL-INTERACTING SERINE/THREONINE-PROTEIN KINASE 12-RELATED			3.87269e-06	8.26e-08		6.44514e-06	8.93176e-06
Solyc02g075615.1	blue	PF04871 - Uso1 / p115 like vesicle tethering protein, C terminal region (Uso1_p115_C)				0.000452631		0.0253865
Solyc02g076800.1	blue	PF14009 - Domain of unknown function (DUF4228) (DUF4228)			9.31697e-09	2.55044e-07		5.65804e-06	1.3726e-06
Solyc02g076830.1	blue	PF01453//PF08276 - D-mannose binding lectin (B_lectin) // PAN-like domain (PAN_2)			0.000196191	0.000485919		0.00253554	0.000331122
Solyc02g077080.3	blue	PTHR32285:SF15 - PROTEIN TRICHOME BIREFRINGENCE-LIKE 37-RELATED			0.0255264	0.0134224		0.0151065	0.00445721
Solyc02g077260.3	blue	PTHR32295:SF9 - IQ-DOMAIN 9 PROTEIN			6.14387e-08	7.83859e-11		4.31857e-07	2.04404e-06
Solyc02g077420.3	blue	3.1.1.32 - Phospholipase A(1) / Phospholipase A1						0.00445085	4.26444e-05
Solyc02g077760.2	blue				5.53924e-29	2.99268e-29		8.91124e-26	7.21865e-27
Solyc02g077850.3	blue	PTHR27003:SF93 - RECEPTOR LIKE PROTEIN 4			7.06275e-06	4.1042e-06		0.00142797	0.000334187
Solyc02g077970.3	blue	PTHR23241:SF65 - LATE EMBRYOGENESIS ABUNDANT PROTEIN (LEA) FAMILY PROTEIN-RELATED			0.00205129	0.0286229			0.0128841
Solyc02g078140.3	blue	PTHR23257//PTHR23257:SF81 - SERINE-THREONINE PROTEIN KINASE // SUBFAMILY NOT NAMED			0.000417629	6.44634e-05		0.000588036	0.00381718
Solyc02g078320.2	blue	PTHR12313//PTHR12313:SF6 - RNF5 // SUBFAMILY NOT NAMED			2.02931e-05	9.89854e-06		0.000690027	0.000246885
Solyc02g078780.3	blue	PTHR27001//PTHR27001:SF91 - FAMILY NOT NAMED // PROTEIN STRUBBELIG-RELATED				0.043456
Solyc02g079010.3	blue	PTHR33098:SF10 - T28P6.11 PROTEIN			0.0138966	0.00883072		0.0305284	0.00957952
Solyc02g079100.3	blue	K00861 - riboflavin kinase (RFK, FMN1)			0.0140154	0.0313095
Solyc02g079250.3	blue	3.1.3.57 - Inositol-1,4-bisphosphate 1-phosphatase / Inositol polyphosphate 1-phosphatase			0.00917339				0.0194324
Solyc02g079430.3	blue	PTHR31717:SF7 - B-BOX DOMAIN PROTEIN 26-RELATED			0.0016905	0.0161004			0.0168607
Solyc02g079500.3	blue				0.00916668	1.4376e-05		0.000514273
Solyc02g079580.3	blue	PTHR27002:SF84 - ATP BINDING / PROTEIN KINASE-RELATED			0.00798723	0.0406653
Solyc02g080270.3	blue	PTHR12937//PTHR12937:SF0 - VACUOLAR PROTEIN SORTING 28, ISOFORM 2 VPS28 // VACUOLAR PROTEIN SORTING-ASSOCIATED PROTEIN 28 HOMOLOG			0.0248192	0.0250636
Solyc02g080320.3	blue	PTHR11079:SF79 - RNA PSEUDOURIDINE SYNTHASE 6, CHLOROPLASTIC			7.41917e-05	7.53712e-05		0.000864833	0.000930677
Solyc02g080670.3	blue	PTHR11709//PTHR11709:SF11 - MULTI-COPPER OXIDASE // SUBFAMILY NOT NAMED						0.0224881	0.00756322
Solyc02g080890.3	blue	PF03106 - WRKY DNA -binding domain (WRKY)			0.00611942	0.030659			0.0488035
Solyc02g081170.3	blue	PF04755 - PAP_fibrillin (PAP_fibrillin)				0.00244986
Solyc02g081330.3	blue				1.72528e-05	8.57308e-13		3.01017e-07	0.000736452
Solyc02g081690.1	blue	PTHR11926//PTHR11926:SF267 - GLUCOSYL/GLUCURONOSYL TRANSFERASES // SUBFAMILY NOT NAMED			2.87172e-05	0.00055381		0.000182045	7.62504e-07
Solyc02g081890.3	blue	K00771 - protein xylosyltransferase (XYLT)			0.000899308	0.000236383		0.0228409	0.0165239
Solyc02g082140.3	blue	PTHR21461:SF12 - F21O3.9 PROTEIN-RELATED			1.85255e-10	1.64252e-09		2.44875e-10	6.39618e-09
Solyc02g082450.3	blue	PTHR31651//PTHR31651:SF3 - FAMILY NOT NAMED // AUXIN EFFLUX CARRIER FAMILY PROTEIN			0.00621575	0.0331499
Solyc02g082470.3	blue	K08852 - serine/threonine-protein kinase/endoribonuclease IRE1 (ERN1)			0.0273163	0.00257803
Solyc02g082490.3	blue	PTHR13832//PTHR13832:SF304 - PROTEIN PHOSPHATASE 2C // PROTEIN PHOSPHATASE 2C 47-RELATED			0.0116855	0.0335527
Solyc02g082540.3	blue	KOG0998 - Synaptic vesicle protein EHS-1 and related EH domain proteins				0.0145975
Solyc02g082660.3	blue	K08739 - DNA mismatch repair protein MLH3 (MLH3)			0.00323893	0.0309563			0.00719365
Solyc02g082690.3	blue	PTHR10241//PTHR10241:SF27 - LETHAL 2 GIANT LARVAE PROTEIN // DUO1-ACTIVATED WD40 1			2.46409e-06	0.000150762		0.00375163	1.84988e-05
Solyc02g082840.3	blue	PTHR23160:SF10 - PROTEIN GRIP			0.00477004	0.0452792
Solyc02g082910.3	blue	6.2.1.1//6.2.1.2 - Acetate--CoA ligase / Acyl-activating enzyme // Butyrate--CoA ligase / Fatty acid thiokinase (medium chain)				0.00185638		0.001941
Solyc02g082950.3	blue	PF13839//PF14416 - GDSL/SGNH-like Acyl-Esterase family found in Pmr5 and Cas1p (PC-Esterase) // PMR5 N terminal Domain (PMR5N)			1.77547e-15	8.87737e-29		1.04608e-31	2.11436e-15
Solyc02g083320.3	blue	K12897 - transformer-2 protein (TRA2)			5.56023e-07	1.19271e-05		0.000464326	3.45674e-05
Solyc02g083730.3	blue	PTHR12231//PTHR12231:SF108 - CTX-RELATED TYPE I TRANSMEMBRANE PROTEIN // SUBFAMILY NOT NAMED			1.48543e-07	3.21474e-09		7.5692e-07	6.68421e-07
Solyc02g083900.3	blue	K08874 - transformation/transcription domain-associated protein (TRRAP)			6.96421e-07	1.46162e-06		0.000713695	3.94773e-05
Solyc02g084240.3	blue	PTHR11467:SF50 - HISTONE H1			9.12342e-05	7.52384e-16		5.5929e-14	0.000800833
Solyc02g084400.3	blue	PTHR10566//PTHR10566:SF93 - CHAPERONE-ACTIVITY OF BC1 COMPLEX CABC1 -RELATED // SUBFAMILY NOT NAMED			0.000931967	0.00152034			0.024233
Solyc02g084430.3	blue				1.8304e-14	8.66883e-15		1.1729e-07	7.19511e-11
Solyc02g084570.3	blue	K09755 - ferulate-5-hydroxylase (CYP84A, F5H)						0.0428536
Solyc02g084590.3	blue	PTHR10071//PTHR10071:SF163 - TRANSCRIPTION FACTOR GATA GATA BINDING FACTOR // GATA TRANSCRIPTION FACTOR 14-RELATED			4.21025e-08	1.90678e-06		6.44399e-05	2.5526e-07
Solyc02g084720.3	blue	PTHR23421//PTHR23421:SF79 - BETA-GALACTOSIDASE RELATED // BETA-GALACTOSIDASE 3			0.000645722	0.00017115		3.6609e-10	5.33339e-08
Solyc02g084740.3	blue	K12637 - 3-epi-6-deoxocathasterone 23-monooxygenase (CYP90C1, ROT3)			2.35089e-06	2.35349e-05		0.000931253	3.80117e-05
Solyc02g084860.1	blue	PTHR22952//PTHR22952:SF182 - CAMP-RESPONSE ELEMENT BINDING PROTEIN-RELATED // SUBFAMILY NOT NAMED	0.000231754			1.28385e-06	7.12315e-05	9.38214e-10
Solyc02g084980.3	blue	PTHR11183//PTHR11183:SF59 - GLYCOGENIN // GALACTINOL SYNTHASE 2-RELATED			3.84552e-14	6.95958e-16		1.68324e-19	1.79627e-12
Solyc02g084990.3	blue	PTHR31451:SF8 - MANNAN ENDO-1,4-BETA-MANNOSIDASE 3-RELATED			1.98673e-14	2.74341e-17		4.5996e-18	6.83126e-15
Solyc02g085030.3	blue	KOG0431 - Auxilin-like protein and related proteins containing DnaJ domain				0.0369417
Solyc02g085630.3	blue	K09338 - homeobox-leucine zipper protein (HD-ZIP)				0.0208294
Solyc02g085640.3	blue	3.4.11.9 - Xaa-Pro aminopeptidase / X-Pro aminopeptidase			5.61202e-06	2.912e-05		0.00132427	6.28765e-05
Solyc02g086130.3	blue	PTHR21726//PTHR21726:SF35 - PHOSPHATIDYLINOSITOL N-ACETYLGLUCOSAMINYLTRANSFERASE SUBUNIT P DOWN SYNDROME CRITICAL REGION PROTEIN 5 -RELATED // SUBFAMILY NOT NAMED			0.000335218	0.002984			0.00761909
Solyc02g086440.3	blue	PTHR24006//PTHR24006:SF492 - FAMILY NOT NAMED // F-BOX/LRR-REPEAT PROTEIN 5			0.000861868	0.00818603			0.00795574
Solyc02g086670.3	blue	K03083 - glycogen synthase kinase 3 beta (GSK3B)			3.07323e-06	7.31857e-05		0.0081702	3.46984e-05
Solyc02g086830.3	blue	PTHR22939:SF81 - PROTEASE DO-LIKE 1, CHLOROPLASTIC			0.000608305	0.00553401			0.00653162
Solyc02g086970.3	blue	PTHR11699//PTHR11699:SF191 - ALDEHYDE DEHYDROGENASE-RELATED // SUBFAMILY NOT NAMED			0.000517648	0.00410382			0.0134626
Solyc02g086980.3	blue				0.00140424	0.000196618		0.0184514	0.0125229
Solyc02g086990.3	blue	PTHR10217//PTHR10217:SF479 - VOLTAGE AND LIGAND GATED POTASSIUM CHANNEL // CYCLIC NUCLEOTIDE-GATED ION CHANNEL 16-RELATED			0.000338886	0.00178169		0.0352302	0.00147257
Solyc02g087060.3	blue	PF00892 - EamA-like transporter family (EamA)			0.00175489	0.00710379			0.0187857
Solyc02g087280.3	blue	PTHR11654:SF82 - PROTEIN NRT1/ PTR FAMILY 5.8-RELATED			6.81079e-08	1.57452e-08		3.17506e-05	2.14151e-06
Solyc02g088090.1	blue	K02183 - calmodulin (CALM)			0.00101179	0.00419151			0.00508366
Solyc02g088300.3	blue	PTHR13018//PTHR13018:SF32 - PROBABLE MEMBRANE PROTEIN DUF221-RELATED // SUBFAMILY NOT NAMED			1.72817e-06	2.82038e-06		0.00041926	2.47872e-05
Solyc02g088830.3	blue	PTHR36747//PTHR36747:SF1 - FAMILY NOT NAMED // HYDROXYPROLINE-RICH GLYCOPROTEIN-LIKE PROTEIN			0.00057175	0.00842357			0.00926472
Solyc02g089065.1	blue	K18635 - protein SPIRAL1 and related proteins (SPR1)			1.35171e-05	1.13755e-05		8.50156e-05	0.000198871
Solyc02g089550.3	blue	PTHR27001:SF217 - PROTEIN NSP-INTERACTING KINASE 1			0.00086748	0.00667887			0.0154736
Solyc02g089610.2	blue	4.1.1.50 - Adenosylmethionine decarboxylase / S-adenosyl-L-methionine decarboxylase			1.34015e-11	2.95416e-12		8.81581e-09	3.76647e-09
Solyc02g089620.3	blue	1.5.5.2 - Proline dehydrogenase			1.5782e-11	6.86079e-10		7.39831e-21	5.62733e-22
Solyc02g089660.2	blue				0.000324896	0.00523588		0.00530916	0.000114768
Solyc02g089930.3	blue	KOG1703 - Adaptor protein Enigma and related PDZ-LIM proteins			0.000991281	5.33853e-05		5.11381e-06	0.00248544
Solyc02g090070.3	blue	PF03000 - NPH3 family (NPH3)			0.00141459	0.018731			0.011529
Solyc02g090130.3	blue	PTHR16166//PTHR16166:SF98 - VACUOLAR PROTEIN SORTING-ASSOCIATED PROTEIN VPS13 // SUBFAMILY NOT NAMED			0.000644182	0.0106071			0.0168693
Solyc02g090267.1	blue	1.14.13.152 - Geraniol 8-hydroxylase / G10H			0.00595906	0.0105553			0.0322514
Solyc02g090360.3	blue	PTHR11709//PTHR11709:SF26 - MULTI-COPPER OXIDASE // SUBFAMILY NOT NAMED			0.00493999	0.00380555		2.98692e-05	7.73373e-05
Solyc02g090580.3	blue	PF04784//PF14389 - Protein of unknown function, DUF547 (DUF547) // Leucine-zipper of ternary complex factor MIP1 (Lzipper-MIP1)			0.0388293	0.0329649
Solyc02g090890.3	blue	K09838 - zeaxanthin epoxidase (ZEP, ABA1)			3.7615e-05	0.000453155		0.00196189	6.64845e-05
Solyc02g091000.3	blue	PF03168 - Late embryogenesis abundant protein (LEA_2)			9.82431e-05	0.00193232		0.0021716	6.55977e-05
Solyc02g091240.1	blue	PTHR31419:SF2 - AUXIN EFFLUX CARRIER FAMILY PROTEIN			0.0391018				0.0108936
Solyc02g091680.3	blue	PTHR30620:SF19 - BETA-D-XYLOSIDASE 6-RELATED			0.000936228	0.0104676		0.0354685	0.00342002
Solyc02g091830.3	blue	PTHR19443:SF18 - HEXOKINASE-LIKE 2 PROTEIN-RELATED				0.0469986
Solyc02g091840.3	blue	PTHR27000:SF174 - LEUCINE-RICH REPEAT RECEPTOR-LIKE SERINE/THREONINE-PROTEIN KINASE BAM1			3.39868e-07	1.72619e-05		0.00240069	7.93646e-06
Solyc02g092270.3	blue	K03937 - NADH dehydrogenase (ubiquinone) Fe-S protein 4 (NDUFS4)			0.0121601	3.92475e-05		0.00102423
Solyc02g092600.3	blue	PF03000 - NPH3 family (NPH3)			0.000393097	0.0034711			0.00890208
Solyc02g092710.3	blue	PTHR10869:SF66 - OXIDOREDUCTASE, 2OG-FE(II) OXYGENASE FAMILY PROTEIN-RELATED			0.0145569				0.047382
Solyc02g092750.3	blue	PTHR13832//PTHR13832:SF270 - PROTEIN PHOSPHATASE 2C // SUBFAMILY NOT NAMED			0.0001012	0.00251164		0.00535815	1.79998e-05
Solyc02g092840.1	blue	PTHR11062:SF52 - GLYCOSYLTRANSFERASE 18						0.0248969
Solyc02g093120.3	blue	KOG1457 - RNA binding protein (contains RRM repeats)			8.46579e-05	0.000718979			0.002358
Solyc02g093230.3	blue	PTHR10509//PTHR10509:SF19 - O-METHYLTRANSFERASE-RELATED // SUBFAMILY NOT NAMED			0.000299115	0.00287848		0.0014435	0.000343595
Solyc02g094120.3	blue	1.8.3.1 - Sulfite oxidase			3.50212e-09	7.91817e-14		5.6637e-14	5.16115e-08
Solyc02g094130.3	blue	PTHR10857//PTHR10857:SF43 - COPINE // SUBFAMILY NOT NAMED			5.95896e-12	1.96031e-14		4.03658e-16	2.38847e-11
Solyc02g094420.3	blue	PTHR21087//PTHR21087:SF4 - SHIKIMATE KINASE // INACTIVE SHIKIMATE KINASE LIKE 1, CHLOROPLASTIC-RELATED			0.00583866	0.0481154
Solyc03g005480.3	blue	PF00892 - EamA-like transporter family (EamA)			1.52971e-06	4.31011e-05		0.00291636	8.8519e-06
Solyc03g005490.3	blue	PTHR14155//PTHR14155:SF178 - RING FINGER DOMAIN-CONTAINING // SUBFAMILY NOT NAMED			4.66186e-05	0.000781797			0.00274367
Solyc03g006260.3	blue	PF01699//PF13499 - Sodium/calcium exchanger protein (Na_Ca_ex) // EF-hand domain pair (EF-hand_7)			0.0333783			0.033201
Solyc03g006620.3	blue	PTHR33098:SF10 - T28P6.11 PROTEIN							0.0235223
Solyc03g006640.3	blue				0.00180204	0.000838651		0.00915019	0.0243758
Solyc03g007180.1	blue				0.0357206				0.0491181
Solyc03g007200.2	blue	1.1.1.54//1.3.1.102//1.3.1.74 - Allyl-alcohol dehydrogenase // 2-alkenal reductase (NADP(+)) / NADPH-dependent alkenal/one oxidoreductase // 2-alkenal reductase (NAD(P)(+)) / NADPH:2-alkenal alpha,beta-hydrogenase			0.000457224	0.000131608		0.00785028	0.0118876
Solyc03g007270.3	blue	PTHR13832//PTHR13832:SF223 - PROTEIN PHOSPHATASE 2C // PROTEIN PHOSPHATASE 2C 76-RELATED			6.53284e-15	1.98989e-17		9.35558e-12	6.92125e-13
Solyc03g007290.3	blue	PTHR10788//PTHR10788:SF39 - TREHALOSE-6-PHOSPHATE SYNTHASE // SUBFAMILY NOT NAMED			2.46104e-17	3.71692e-16		1.24349e-18	1.68126e-23
Solyc03g007360.3	blue	PTHR10791:SF28 - BIDIRECTIONAL SUGAR TRANSPORTER SWEET3			1.79841e-14	4.11861e-14		9.59801e-12	6.09754e-12
Solyc03g007370.3	blue	PTHR30603//PTHR30603:SF4 - RNA POLYMERASE SIGMA FACTOR RPO // RNA POLYMERASE SIGMA FACTOR SIGE, CHLOROPLASTIC/MITOCHONDRIAL			9.02171e-15	1.15817e-15		6.88564e-12	5.81628e-14
Solyc03g007560.2	blue	K12869 - crooked neck (CRN, CRNKL1, CLF1, SYF3)			0.0320968	0.0363534
Solyc03g007580.2	blue	PTHR12064//PTHR12064:SF36 - ANCIENT CONSERVED DOMAIN PROTEIN-RELATED // SUBFAMILY NOT NAMED			2.14779e-31	1.29544e-34		1.03893e-38	2.01083e-34
Solyc03g007760.3	blue	PTHR23074:SF99 - P-LOOP CONTAINING NUCLEOSIDE TRIPHOSPHATE HYDROLASES SUPERFAMILY PROTEIN			0.00064149	0.000224139		2.79159e-22	5.1588e-16
Solyc03g007775.1	blue	PTHR34576:SF3 - MEMBRANE-ASSOCIATED KINASE REGULATOR 6-RELATED			0.000218751	0.0013589			0.00565375
Solyc03g007960.3	blue	1.14.13.129 - Beta-carotene 3-hydroxylase / Beta-carotene 3,3'-monooxygenase			0.000543133	4.25006e-06		8.50156e-05	0.00391051
Solyc03g019790.3	blue	PTHR11452//PTHR11452:SF32 - ALPHA-GALACTOSIDASE/ALPHA-N-ACETYLGALACTOSAMINIDASE // SUBFAMILY NOT NAMED	0.00623533		0.000371815	2.26378e-14		4.5577e-11	0.00539082
Solyc03g019880.3	blue				1.76037e-09	8.59785e-08		1.34158e-07	4.0802e-10
Solyc03g020020.3	blue	PTHR23185:SF0 - PROTEIN VIRILIZER HOMOLOG						0.0461481	0.0125316
Solyc03g025360.3	blue	PTHR24361//PTHR24361:SF253 - MITOGEN-ACTIVATED KINASE KINASE KINASE // SUBFAMILY NOT NAMED				0.00812819
Solyc03g025410.3	blue	1.1.1.330 - Very-long-chain 3-oxoacyl-CoA reductase / Very-long-chain beta-ketoacyl-CoA reductase			0.0418472				0.030405
Solyc03g025720.3	blue	6.2.1.8 - Oxalate--CoA ligase / Oxalyl-CoA synthetase			5.58488e-09	1.61796e-12		7.12172e-10	6.26067e-08
Solyc03g025790.3	blue	PTHR22814//PTHR22814:SF140 - COPPER TRANSPORT PROTEIN ATOX1-RELATED // HEAVY METAL TRANSPORT/DETOXIFICATION SUPERFAMILY PROTEIN						0.0442011
Solyc03g025930.3	blue	PF12937 - F-box-like (F-box-like)			0.0331084	0.00945177
Solyc03g026220.3	blue	PTHR12329:SF11 - BAG FAMILY MOLECULAR CHAPERONE REGULATOR 2-RELATED			8.29979e-14	2.66575e-12		2.17272e-16	2.25118e-20
Solyc03g026300.3	blue	PTHR13148//PTHR13148:SF2 - PER1-RELATED // PER1-LIKE FAMILY PROTEIN			0.0017128	0.0062537		0.0152665	0.00310753
Solyc03g026370.1	blue	PF01476 - LysM domain (LysM)			8.70659e-05	0.00014079		0.0175037	0.00192676
Solyc03g031830.2	blue				9.08249e-07	1.67995e-07		0.000369142	6.4479e-05
Solyc03g031860.3	blue	2.5.1.32 - 15-cis-phytoene synthase / PSase			6.07086e-20	4.36653e-33		1.9024e-23	2.08334e-17
Solyc03g033310.3	blue	K12897 - transformer-2 protein (TRA2)			0.00123063	0.00319373			0.0166331
Solyc03g033460.3	blue	PTHR22601//PTHR22601:SF12 - ISP4 LIKE PROTEIN // SUBFAMILY NOT NAMED			0.00402331	0.000472566		0.0002322	0.00117297
Solyc03g033540.3	blue	PTHR24349//PTHR24349:SF137 - SERINE/THREONINE-PROTEIN KINASE // SUBFAMILY NOT NAMED			0.00896435	0.0165022
Solyc03g033660.3	blue	PTHR10071//PTHR10071:SF163 - TRANSCRIPTION FACTOR GATA GATA BINDING FACTOR // GATA TRANSCRIPTION FACTOR 14-RELATED			0.00392703	0.0405657			0.012276
Solyc03g033710.3	blue	PTHR31388:SF3 - PEROXIDASE 36-RELATED			0.00157461	0.000979642		0.00231195	0.00397314
Solyc03g034050.3	blue				0.0452136				0.00495183
Solyc03g034450.3	blue	PTHR10315//PTHR10315:SF31 - SEVEN IN ABSENTIA HOMOLOG // SUBFAMILY NOT NAMED			0.00300557	0.0157314			0.0157509
Solyc03g046590.3	blue	PF14817 - HAUS augmin-like complex subunit 5 (HAUS5)						0.0417973
Solyc03g051790.3	blue	PTHR31344//PTHR31344:SF4 - FAMILY NOT NAMED // NUCLEOLAR PROTEIN GAR2-LIKE PROTEIN			0.0042481	0.00231599		0.00552723	0.00343136
Solyc03g058860.3	blue	1.4.1.24 - 3-dehydroquinate synthase II / DHQ synthase II			0.0065698	0.00564424
Solyc03g058970.3	blue	2.4.1.82 - Galactinol--sucrose galactosyltransferase / Raffinose synthase			0.00270963	0.00337276		0.0141699	0.0358485
Solyc03g059260.3	blue	PTHR32060//PTHR32060:SF5 - FAMILY NOT NAMED // PEPTIDASE S41 FAMILY PROTEIN			6.03442e-11	2.68966e-11		1.92943e-06	1.92416e-08
Solyc03g059310.3	blue	K08266 - G protein beta subunit-like (GBL)			0.00210365	0.00814153			0.0283934
Solyc03g063240.3	blue	PTHR13343//PTHR13343:SF4 - CREG1 PROTEIN // SUBFAMILY NOT NAMED			5.03128e-05	6.96268e-07		0.000677874	0.00188744
Solyc03g071620.1	blue	K11252 - histone H2B (H2B)			0.0248449	0.0267277		0.0277991	0.00397967
Solyc03g078380.1	blue	PTHR10168:SF70 - GLUTAREDOXIN FAMILY PROTEIN				0.036336		0.0328368
Solyc03g078400.3	blue	PTHR11937//PTHR11937:SF200 - ACTIN // ACTIN-7			0.0188789	0.00446835		0.000553625
Solyc03g080030.3	blue					0.018851		0.000567281
Solyc03g080100.3	blue	PTHR22814//PTHR22814:SF51 - COPPER TRANSPORT PROTEIN ATOX1-RELATED // HEAVY METAL TRANSPORT/DETOXIFICATION DOMAIN-CONTAINING PROTEIN			3.95194e-18	1.31013e-17		6.72484e-14	4.59373e-16
Solyc03g080140.3	blue				0.000737237	0.00756858			0.0145987
Solyc03g080150.3	blue	K00430 - peroxidase (E1.11.1.7)			3.77592e-07	1.98406e-05		0.000518676	2.78472e-07
Solyc03g082450.3	blue	PTHR27000:SF44 - F12K21.25			0.000489341	0.00417654			0.00744245
Solyc03g082590.3	blue	KOG2197//KOG3147 - Ypt/Rab-specific GTPase-activating protein GYP7 and related proteins // 6-phosphogluconolactonase - like protein			0.0101788	0.0165926
Solyc03g082720.3	blue	KOG3399 - Predicted Yippee-type zinc-binding protein			8.0575e-06	1.16642e-07		1.23898e-08	2.75475e-06
Solyc03g082850.3	blue	K09122 - hypothetical protein (K09122)			0.000155988	0.00241869		0.0461409	0.00465291
Solyc03g083060.3	blue	PTHR21596//PTHR21596:SF19 - RIBONUCLEASE P SUBUNIT P38 // EMB|CAB82814.1			0.0117641				0.0317967
Solyc03g083070.2	blue	PTHR21136//PTHR21136:SF93 - SNARE PROTEINS // VESICLE-ASSOCIATED MEMBRANE PROTEIN-LIKE PROTEIN			3.59136e-06	5.86827e-06		8.11857e-05	6.98132e-05
Solyc03g083420.3	blue	PTHR24056//PTHR24056:SF181 - CELL DIVISION PROTEIN KINASE // PLASTID-LIPID-ASSOCIATED PROTEIN 14, CHLOROPLASTIC-RELATED			0.0102988				0.01625
Solyc03g083615.1	blue	PTHR31080:SF9 - INVERTASE/PECTIN METHYLESTERASE INHIBITOR FAMILY PROTEIN / DC 1.2-LIKE PROTEIN-RELATED			3.33041e-08	9.02413e-10		2.03262e-07	8.23452e-07
Solyc03g083910.3	blue				1.30698e-12	1.35379e-13		9.93646e-12	3.33642e-11
Solyc03g093140.3	blue	K13783 - MFS transporter, OPA family, solute carrier family 37 (glycerol-3-phosphate transporter), member 1/2 (SLC37A1_2)			1.65971e-25	7.47815e-25		1.63415e-50	2.35365e-47
Solyc03g093470.3	blue	PTHR31284//PTHR31284:SF7 - FAMILY NOT NAMED // ACID PHOSPHATASE-RELATED			0.045575	0.00604872
Solyc03g096080.3	blue	PF03226 - Yippee zinc-binding/DNA-binding /Mis18, centromere assembly (Yippee-Mis18)			1.27879e-08	1.5346e-07		1.29945e-06	2.62795e-07
Solyc03g096460.3	blue	PTHR31718//PTHR31718:SF0 - FAMILY NOT NAMED // EXPRESSED PROTEIN-RELATED			6.79174e-05	1.77621e-08		1.29884e-10	4.48625e-05
Solyc03g096730.3	blue	2.7.7.22 - Mannose-1-phosphate guanylyltransferase (GDP) / GDP-mannose pyrophosphorylase			0.012796	0.0149743	0.0273832	2.75797e-09	3.35888e-05
Solyc03g096770.1	blue				0.0299586	0.015438
Solyc03g096780.1	blue								0.0168263
Solyc03g096900.3	blue	PTHR21262//PTHR21262:SF7 - GUANOSINE-3',5'-BIS DIPHOSPHATE 3'-PYROPHOSPHOHYDROLASE // SUBFAMILY NOT NAMED			3.93972e-06	6.06571e-05		0.000410416	9.05398e-07
Solyc03g096980.1	blue	KOG0156 - Cytochrome P450 CYP2 subfamily			0.011689	0.0485305			0.0445273
Solyc03g097585.1	blue	PTHR10791//PTHR10791:SF33 - RAG1-ACTIVATING PROTEIN 1 // SUBFAMILY NOT NAMED	0.015271			0.0168656
Solyc03g097650.3	blue	PF02365 - No apical meristem (NAM) protein (NAM)			0.00326975	0.0173145		0.0217062	0.00159447
Solyc03g098000.3	blue	PF05542 - Protein of unknown function (DUF760) (DUF760)				0.0240589		0.0361216
Solyc03g098020.3	blue	PTHR11614:SF87 - MONOGLYCERIDE LIPASE			0.00492929	0.00517621		0.0340358	0.00677674
Solyc03g098100.3	blue	1.1.1.334 - Methylecgonone reductase			1.09028e-07	1.32498e-06		0.000491413	8.12833e-06
Solyc03g098170.3	blue	K17262 - tubulin-folding cofactor B (TBCB, CKAP1, ALF1)			0.00671266	0.033746			0.0401003
Solyc03g098320.3	blue	PTHR12802//PTHR12802:SF60 - SWI/SNF COMPLEX-RELATED // PROTEIN REVEILLE 1-RELATED			2.26784e-41	8.55525e-75		2.81787e-65	3.50022e-39
Solyc03g098730.1	blue	PTHR33107:SF5 - KUNITZ FAMILY TRYPSIN AND PROTEASE INHIBITOR PROTEIN-RELATED			0.00130353	0.0116341		0.00102385	0.00210837
Solyc03g098750.3	blue				7.12059e-06	9.65204e-07		1.13453e-06	3.4526e-05
Solyc03g111160.3	blue	PTHR10343//PTHR10343:SF58 - 5'-AMP-ACTIVATED PROTEIN KINASE , BETA SUBUNIT // PHOSPHOGLUCAN PHOSPHATASE DSP4, CHLOROPLASTIC			0.0309654	0.0126041
Solyc03g111170.3	blue	PTHR24096//PTHR24096:SF251 - FAMILY NOT NAMED // 4-COUMARATE--COA LIGASE-LIKE 9							0.00352871
Solyc03g111665.1	blue				0.000449366	0.00256447		0.000744627	0.00949154
Solyc03g111740.3	blue	K17890 - autophagy-related protein 16, animal type (ATG16L)				0.0377936
Solyc03g112050.3	blue	PTHR24058//PTHR24058:SF58 - DUAL SPECIFICITY PROTEIN KINASE // SUBFAMILY NOT NAMED				0.0420022
Solyc03g112540.3	blue	PTHR24320:SF81 - NAD(P)-BINDING ROSSMANN-FOLD SUPERFAMILY PROTEIN			3.89632e-13	6.28133e-12		2.17419e-08	2.29146e-11
Solyc03g113090.3	blue				1.88883e-08	1.26346e-06		0.00047827	2.09747e-06
Solyc03g113340.3	blue	PTHR21576//PTHR21576:SF33 - UNCHARACTERIZED NODULIN-LIKE PROTEIN // F14D16.8-RELATED			0.000487315	0.00186045			0.00941128
Solyc03g113560.3	blue	PTHR12565//PTHR12565:SF143 - STEROL REGULATORY ELEMENT-BINDING PROTEIN // SUBFAMILY NOT NAMED	0.0248115			0.0168244
Solyc03g113620.3	blue	PTHR12374//PTHR12374:SF25 - TRANSCRIPTIONAL ADAPTOR 2 ADA2 -RELATED // SUBFAMILY NOT NAMED			0.000496211	0.00219267		2.20809e-10	4.3567e-09
Solyc03g113970.3	blue	PF07887 - Calmodulin binding protein-like (Calmodulin_bind)			0.0179678				0.0233759
Solyc03g114000.3	blue	K09377 - cysteine and glycine-rich protein (CSRP)			0.0197044	0.0162518		0.00663855	0.0299603
Solyc03g114030.3	blue	PTHR11119:SF48 - NUCLEOBASE-ASCORBATE TRANSPORTER 5-RELATED			8.02862e-06	7.10745e-05		0.000713453	8.38491e-06
Solyc03g114080.2	blue	PF07714//PF08263//PF13855 - Protein tyrosine kinase (Pkinase_Tyr) // Leucine rich repeat N-terminal domain (LRRNT_2) // Leucine rich repeat (LRR_8)	0.0142176		0.024103	2.91456e-05		0.0103462
Solyc03g114120.3	blue	PF14622 - Ribonuclease-III-like (Ribonucleas_3_3)			0.000224388	9.18711e-08		3.17755e-06	0.000941406
Solyc03g114150.3	blue	1.2.1.39 - Phenylacetaldehyde dehydrogenase			6.93771e-05	1.81797e-05		0.000613793	0.00184913
Solyc03g114340.3	blue	1.1.1.267 - 1-deoxy-D-xylulose-5-phosphate reductoisomerase / DXP-reductoisomerase	0.0136436		0.0459359	4.91079e-07		8.91401e-05
Solyc03g114350.1	blue	PF07816 - Protein of unknown function (DUF1645) (DUF1645)							0.0281472
Solyc03g114400.3	blue	PTHR11064//PTHR11064:SF35 - CCAAT-BINDING TRANSCRIPTION FACTOR-RELATED // PROTEIN DR1 HOMOLOG			0.0145241	0.00959345
Solyc03g114940.3	blue	PTHR24298:SF112 - CYTOCHROME P450 78A5-RELATED	0.00987595			0.000357482	0.0139933	0.000378828
Solyc03g115000.3	blue	PF14309//PF14383 - Domain of unknown function (DUF4378) (DUF4378) // DUF761-associated sequence motif (VARLMGL)			0.00769474	0.0215756		0.00715824	0.00120362
Solyc03g115020.3	blue	PF06549 - Protein of unknown function (DUF1118) (DUF1118)			0.000129211	0.00011391		0.00375758	0.00316792
Solyc03g115230.3	blue	PTHR11638//PTHR11638:SF116 - ATP-DEPENDENT CLP PROTEASE // SUBFAMILY NOT NAMED			0.000166921	4.18003e-05		1.05531e-05	0.0010951
Solyc03g115470.3	blue	K18211 - synaptosomal-associated protein 25 (SNAP25)			7.39398e-09	8.12783e-07		0.000131237	1.92776e-06
Solyc03g115690.1	blue				0.00221223	0.0177365			0.0235344
Solyc03g115700.3	blue	PTHR24343//PTHR24343:SF156 - SERINE/THREONINE KINASE // SUBFAMILY NOT NAMED			2.04652e-09	4.47748e-08		2.23824e-05	6.87931e-08
Solyc03g115860.3	blue	KOG3292 - Predicted membrane protein			0.000288965	0.00298131		0.0457473	0.0041605
Solyc03g115950.3	blue		0.0264802			3.74802e-06		3.47006e-05
Solyc03g116120.2	blue	PTHR11260:SF221 - GLUTATHIONE S-TRANSFERASE U9				0.0422584
Solyc03g116243.1	blue				0.027457	0.00727075
Solyc03g116260.3	blue	PTHR10209//PTHR10209:SF188 - OXIDOREDUCTASE, 2OG-FE II OXYGENASE FAMILY PROTEIN // SUBFAMILY NOT NAMED			0.000804043	0.00123625		0.0127989	0.0147321
Solyc03g116270.3	blue	PTHR10209//PTHR10209:SF188 - OXIDOREDUCTASE, 2OG-FE II OXYGENASE FAMILY PROTEIN // SUBFAMILY NOT NAMED			8.65046e-05	0.00122958		8.47598e-08	3.6275e-09
Solyc03g116340.3	blue	PTHR23042//PTHR23042:SF51 - CIRCADIAN PROTEIN CLOCK/ARNT/BMAL/PAS // TRANSCRIPTION FACTOR BHLH47			1.98491e-06	8.53258e-08		0.000209056	0.000142685
Solyc03g116350.3	blue	PTHR12300:SF52 - HVA22-LIKE PROTEIN A-RELATED			0.0378471	0.00337276
Solyc03g116570.3	blue	PF04134 - Protein of unknown function, DUF393 (DUF393)			1.01831e-05	3.18657e-07		0.000310535	0.000363192
Solyc03g116710.3	blue	PTHR31087:SF2 - PROTEIN LURP-ONE-RELATED 12-RELATED			0.000894996	0.011872		0.00548724	1.30956e-05
Solyc03g116910.3	blue	K09753 - cinnamoyl-CoA reductase (CCR)			2.5964e-30	1.02534e-34		4.6795e-53	5.68994e-34
Solyc03g117370.3	blue	K14963 - COMPASS component SWD3 (WDR5, SWD3, CPS30)			0.000298113	0.000651295		0.0255834	0.00154245
Solyc03g117420.3	blue	PTHR24006//PTHR24006:SF451 - FAMILY NOT NAMED // UBIQUITIN CARBOXYL-TERMINAL HYDROLASE			2.14141e-06	1.30328e-07		1.7371e-06	1.04868e-05
Solyc03g117890.3	blue	PTHR31096//PTHR31096:SF16 - FAMILY NOT NAMED // ACT DOMAIN-CONTAINING PROTEIN			0.00600186	1.26834e-05		8.43524e-06
Solyc03g118120.3	blue				0.0206736	0.00168445
Solyc03g118150.3	blue	PTHR10174//PTHR10174:SF145 - RETINALDEHYDE BINDING PROTEIN-RELATED // SUBFAMILY NOT NAMED			0.00181398	0.0191133			0.0191388
Solyc03g118650.3	blue	PTHR10091//PTHR10091:SF8 - ALDOSE-1-EPIMERASE // SUBFAMILY NOT NAMED			7.20999e-05	7.76799e-05		0.00128404	0.000349953
Solyc03g119700.3	blue	K06891 - ATP-dependent Clp protease adaptor protein ClpS (clpS)			9.94471e-06	2.96277e-05		0.00514139	0.000561483
Solyc03g120240.3	blue	PTHR12952//PTHR12952:SF0 - SYS1 // PROTEIN SYS1 HOMOLOG-RELATED			0.0179353	0.0177214
Solyc03g120310.3	blue	PTHR12526//PTHR12526:SF160 - GLYCOSYLTRANSFERASE // SUBFAMILY NOT NAMED			0.00409354	0.0294202
Solyc03g120330.1	blue	PF00646//PF01344 - F-box domain (F-box) // Kelch motif (Kelch_1)			0.0051756	0.00988252			0.0153228
Solyc03g120670.3	blue	K18606 - hydroxyphenylpyruvate reductase (HPPR)			0.0221332	0.00397033		0.0454772
Solyc03g120760.3	blue	PTHR27001//PTHR27001:SF27 - FAMILY NOT NAMED // PROLINE-RICH RECEPTOR-LIKE PROTEIN KINASE PERK15			2.40696e-05	0.000164226		0.0296296	0.0011294
Solyc03g121960.3	blue	K00679 - phospholipid:diacylglycerol acyltransferase (E2.3.1.158)			0.00642101	0.0161227			0.00820067
Solyc03g122340.3	blue	PTHR11771//PTHR11771:SF38 - LIPOXYGENASE // LIPOXYGENASE 3, CHLOROPLASTIC-RELATED			0.000947927	0.0114112			0.00576611
Solyc03g123720.3	blue	K03691 - peptide-O-fucosyltransferase (POFUT)	0.0190306			0.000301842	0.0295074	6.85386e-05
Solyc04g005060.3	blue	PTHR31358:SF6 - F3I6.9 PROTEIN			0.0168145				0.0347999
Solyc04g005200.3	blue	K14759 - isochorismate synthase / 2-succinyl-5-enolpyruvyl-6-hydroxy-3-cyclohexene-1-carboxylate synthase / 2-succinyl-6-hydroxy-2,4-cyclohexadiene-1-carboxylate synthase / O-succinylbenzoate synthase (PHYLLO)				0.0471886
Solyc04g005490.3	blue	PTHR11106//PTHR11106:SF65 - GANGLIOSIDE INDUCED DIFFERENTIATION ASSOCIATED PROTEIN 2-RELATED // SUBFAMILY NOT NAMED				0.0169613
Solyc04g006940.3	blue	PTHR24092//PTHR24092:SF41 - FAMILY NOT NAMED // PHOSPHOLIPID-TRANSPORTING ATPASE 10-RELATED			0.000955584	0.00757631		4.38341e-05	1.37096e-07
Solyc04g007060.3	blue	PTHR23155//PTHR23155:SF619 - LEUCINE-RICH REPEAT-CONTAINING PROTEIN // SUBFAMILY NOT NAMED				0.0220566		1.22445e-05
Solyc04g007270.3	blue	PTHR15856//PTHR15856:SF29 - PHD FINGER PROTEIN 20-RELATED // SUBFAMILY NOT NAMED			0.000910105	0.0166702			0.00450248
Solyc04g007600.3	blue	PTHR23012//PTHR23012:SF100 - MEMBRANE ASSOCIATED RING FINGER // SUBFAMILY NOT NAMED			0.0117363	0.00143494		0.0225674	0.03905
Solyc04g007710.3	blue	PTHR24055:SF211 - MITOGEN-ACTIVATED PROTEIN KINASE 16-RELATED						0.0171315
Solyc04g008150.2	blue	PTHR23155//PTHR23155:SF619 - LEUCINE-RICH REPEAT-CONTAINING PROTEIN // SUBFAMILY NOT NAMED	0.00478224			0.00392339	0.03798
Solyc04g008230.3	blue	PF13229 - Right handed beta helix region (Beta_helix)	0.0305174		0.00108232	2.68073e-11		3.64708e-07	0.0148655
Solyc04g008290.3	blue	PTHR19321//PTHR19321:SF5 - PROTEIN REGULATOR OF CYTOKINESIS 1 PRC1-RELATED // 65-KDA MICROTUBULE-ASSOCIATED PROTEIN 6-RELATED			0.0102096	0.0335388		0.0249783	0.0144778
Solyc04g008500.3	blue	PTHR10593:SF38 - C2H2-LIKE ZINC FINGER PROTEIN-RELATED			0.0134802	0.0409078			0.0214696
Solyc04g008980.3	blue	PTHR24006:SF524 - UBIQUITIN CARBOXYL-TERMINAL HYDROLASE 21			0.000292394	1.98094e-06		0.000532344	0.00235148
Solyc04g009010.2	blue	K00587 - protein-S-isoprenylcysteine O-methyltransferase (ICMT, STE14)			0.00569612	0.027965
Solyc04g009050.3	blue	PTHR33334//PTHR33334:SF5 - FAMILY NOT NAMED // DENTIN SIALOPHOSPHOPROTEIN-LIKE PROTEIN			0.000522137	2.01251e-06		0.000308312	0.0118478
Solyc04g009470.3	blue	PF16987 - KIX domain (KIX_2)			0.0390312	0.0256623
Solyc04g009770.3	blue	K09503 - DnaJ homolog subfamily A member 2 (DNAJA2)			1.20468e-11	5.093e-11		1.20853e-12	1.54869e-09
Solyc04g009900.3	blue	2.7.11.1//4.1.1.49 - Non-specific serine/threonine protein kinase / Threonine-specific protein kinase // Phosphoenolpyruvate carboxykinase (ATP) / Phosphopyruvate carboxylase			7.54819e-05	0.000863525		4.52315e-19	5.1654e-13
Solyc04g009910.3	blue	2.7.11.1//4.1.1.49 - Non-specific serine/threonine protein kinase / Threonine-specific protein kinase // Phosphoenolpyruvate carboxykinase (ATP) / Phosphopyruvate carboxylase			3.08564e-10	2.62146e-09		3.41243e-06	2.7479e-08
Solyc04g009920.3	blue	PTHR11183//PTHR11183:SF39 - GLYCOGENIN // PROTEIN GYG-1, ISOFORM A			0.0271821			0.0102154
Solyc04g009960.3	blue	4.1.2.48 - Low-specificity L-threonine aldolase			0.000645148	0.00418954		0.00830593	0.000437047
Solyc04g010190.1	blue	PTHR14154//PTHR14154:SF15 - UPF0041 BRAIN PROTEIN 44-RELATED // PEPTIDYL-PROLYL CIS-TRANS ISOMERASE, PUTATIVE-RELATED			0.000209879	5.37112e-05		0.0135027	0.00587069
Solyc04g011340.3	blue	PF00892 - EamA-like transporter family (EamA)			9.19102e-07	8.32918e-06		1.55722e-05	6.43482e-06
Solyc04g011440.3	blue				7.17983e-06	1.40357e-07	0.0374552	2.97179e-13	5.06061e-10
Solyc04g014370.3	blue	K10703 - very-long-chain (3R)-3-hydroxyacyl-CoA dehydratase (PHS1, PAS2)			0.000179369	0.00180241			0.00585354
Solyc04g014390.3	blue	K17424 - large subunit ribosomal protein L43 (MRPL43)			4.41111e-08	4.19564e-07		2.85935e-05	5.79072e-06
Solyc04g014480.3	blue	PTHR11527:SF142 - 15.7 KDA HEAT SHOCK PROTEIN, PEROXISOMAL			2.16105e-06	0.000104564		0.000559304	3.46725e-06
Solyc04g014810.3	blue	PTHR23315//PTHR23315:SF129 - BETA CATENIN-RELATED ARMADILLO REPEAT-CONTAINING // ARMADILLO/BETA-CATENIN-LIKE REPEAT-CONTAINING PROTEIN			0.00104376	0.000282125		0.0263819	0.0115156
Solyc04g014870.3	blue	K11699 - RNA-dependent RNA polymerase [EC:2.7.7.48] (RDR, RDRP)			0.0125516	0.0422574			0.0390788
Solyc04g015120.3	blue	PTHR31964:SF10 - ADENINE NUCLEOTIDE ALPHA HYDROLASES-LIKE SUPERFAMILY PROTEIN			8.23011e-06	4.67062e-11		1.32844e-10	1.31932e-05
Solyc04g015220.3	blue	PTHR23155//PTHR23155:SF403 - LEUCINE-RICH REPEAT-CONTAINING PROTEIN // SUBFAMILY NOT NAMED			9.02264e-12	6.82425e-13		3.67021e-15	7.82228e-11
Solyc04g015520.3	blue	PF03763 - Remorin, C-terminal region (Remorin_C)			7.75479e-09	2.03182e-06		4.80787e-05	7.27146e-07
Solyc04g015590.3	blue	1.3.1.77 - Anthocyanidin reductase / ANR			0.000502982	0.00189148		0.0192162	0.00717842
Solyc04g015600.3	blue	PF00560//PF07714 - Leucine Rich Repeat (LRR_1) // Protein tyrosine kinase (Pkinase_Tyr)			0.000132679	0.00440208		0.0312692	0.000352517
Solyc04g015680.3	blue	K01408 - insulysin (IDE, ide)			0.0181591	0.00644523		0.0110738
Solyc04g016060.1	blue	PTHR31696:SF14 - PROTEIN MIZU-KUSSEI 1			5.23171e-16	3.27349e-20		2.85227e-22	8.61979e-18
Solyc04g016230.3	blue	PTHR11926//PTHR11926:SF404 - GLUCOSYL/GLUCURONOSYL TRANSFERASES // SUBFAMILY NOT NAMED			0.000143714	0.000781637		0.0423445	0.00304802
Solyc04g017750.3	blue	PTHR33923//PTHR33923:SF3 - FAMILY NOT NAMED // CALMODULIN-BINDING PROTEIN				0.0119129
Solyc04g025990.3	blue	PTHR30540//PTHR30540:SF4 - OSMOTIC STRESS POTASSIUM TRANSPORTER // POTASSIUM TRANSPORTER 12-RELATED							0.00592625
Solyc04g049800.3	blue	PTHR32467//PTHR32467:SF29 - FAMILY NOT NAMED // ETHYLENE-RESPONSIVE TRANSCRIPTION FACTOR RAP2-7			0.00948663	0.037672			0.0427175
Solyc04g049920.3	blue	KOG0149 - Predicted RNA-binding protein SEB4 (RRM superfamily)						0.016595
Solyc04g051820.3	blue				5.1808e-06	2.39932e-07		8.21176e-06	0.000108303
Solyc04g054480.3	blue	PTHR23315//PTHR23315:SF66 - BETA CATENIN-RELATED ARMADILLO REPEAT-CONTAINING // CELLULOSE SYNTHASE-INTERACTIVE PROTEIN 1			0.0129146	0.000716053	0.0270624	4.01013e-11	0.00381019
Solyc04g054930.3	blue	PTHR10788//PTHR10788:SF19 - TREHALOSE-6-PHOSPHATE SYNTHASE // TREHALOSE-PHOSPHATE PHOSPHATASE E-RELATED			0.00312998	1.07119e-05		1.97705e-05	0.00873508
Solyc04g055090.1	blue				0.000396593	0.00108001		0.0025623	0.000315986
Solyc04g056390.3	blue	5.3.3.2 - Isopentenyl-diphosphate Delta-isomerase / Methylbutenylpyrophosphate isomerase				0.0418882
Solyc04g058100.3	blue	PF01439 - Metallothionein (Metallothio_2)			3.6771e-46	2.70309e-65		2.26395e-42	5.38949e-44
Solyc04g063380.3	blue	K03875 - F-box and leucine-rich repeat protein 1 (S-phase kinase-associated protein 2) (SKP2, FBXL1)			3.11686e-10	1.54603e-11		9.30471e-08	1.79734e-08
Solyc04g064630.3	blue	PTHR10791//PTHR10791:SF38 - RAG1-ACTIVATING PROTEIN 1 // SUBFAMILY NOT NAMED			6.70615e-27	1.29471e-32		5.52799e-29	4.29014e-27
Solyc04g071160.3	blue	PTHR13690:SF86 - TRANSCRIPTION FACTOR VIP1			0.000815197	0.0021201			0.0156911
Solyc04g071650.3	blue	2.4.1.12//2.4.1.29 - Cellulose synthase (UDP-forming) / UDP-glucose-cellulose glucosyltransferase // Cellulose synthase (GDP-forming) / GDP-glucose-cellulose glucosyltransferase			3.83945e-05	7.90067e-07		3.54799e-24	7.84398e-09
Solyc04g071700.3	blue	PTHR13017 - 5-FORMYLTETRAHYDROFOLATE CYCLO-LIGASE-RELATED			0.00451439	0.0177783			0.04947
Solyc04g072050.3	blue	PF07343 - Protein of unknown function (DUF1475) (DUF1475)			3.02426e-05	2.64297e-08		3.02705e-05	0.00090565
Solyc04g072240.3	blue	PTHR22604//PTHR22604:SF132 - OXIDOREDUCTASES // NAD(P)-BINDING ROSSMANN-FOLD SUPERFAMILY PROTEIN	0.000515738		0.0258443	3.27686e-10	0.000726191	2.02471e-10
Solyc04g072895.1	blue	PTHR22847//PTHR22847:SF453 - WD40 REPEAT PROTEIN // SUBFAMILY NOT NAMED			0.00244688	0.000794532		1.01425e-05	0.000427494
Solyc04g073970.3	blue	PTHR31132//PTHR31132:SF2 - FAMILY NOT NAMED // EXPRESSED PROTEIN				0.00781001		0.00532258	0.0298576
Solyc04g074340.3	blue	PTHR11926//PTHR11926:SF280 - GLUCOSYL/GLUCURONOSYL TRANSFERASES // SUBFAMILY NOT NAMED			0.00073276	0.00398106		0.00392756	0.000131047
Solyc04g074580.1	blue	K11253 - histone H3 (H3)						0.0424888
Solyc04g074880.3	blue				1.86922e-06	7.06084e-06		5.78273e-05	1.24124e-06
Solyc04g076010.3	blue				5.92706e-26	4.06924e-28		7.88449e-42	4.01178e-35
Solyc04g076020.3	blue	K11807 - WD and tetratricopeptide repeats protein 1 (WDTC1)			0.0146135				0.0348097
Solyc04g076670.3	blue	PTHR16295 - TRAF-TYPE ZINC FINGER PROTEIN-RELATED			0.000748041	0.00453319		0.0421698	0.0074351
Solyc04g076850.3	blue	PTHR31734//PTHR31734:SF18 - FAMILY NOT NAMED // AUXIN-RESPONSIVE PROTEIN IAA8			0.0260512	0.000115929		0.0145643
Solyc04g077020.3	blue	PTHR11588//PTHR11588:SF103 - TUBULIN // SUBFAMILY NOT NAMED					0.038828	0.0222827
Solyc04g077210.3	blue	PTHR11850:SF64 - HOMEOBOX PROTEIN KNOTTED-1-LIKE 1				0.00642034
Solyc04g077230.1	blue				0.0199368	0.000521532		0.0232445
Solyc04g077260.3	blue	PTHR10641:SF519 - TRANSCRIPTION FACTOR RAX2			0.00886048	0.00127048		0.0148976
Solyc04g077470.3	blue	PTHR32044:SF7 - XYLOGLUCAN GLYCOSYLTRANSFERASE 12-RELATED			7.17983e-06	5.31244e-05		0.0026219	0.000129697
Solyc04g078540.3	blue	PTHR12411//PTHR12411:SF345 - CYSTEINE PROTEASE FAMILY C1-RELATED // SUBFAMILY NOT NAMED				0.0437899
Solyc04g078640.2	blue	PTHR31729//PTHR31729:SF2 - FAMILY NOT NAMED // ETHYLENE-RESPONSIVE TRANSCRIPTION FACTOR RAP2-1			3.09208e-09	1.25074e-07		1.16208e-10	2.49643e-07
Solyc04g078750.3	blue	PTHR31852//PTHR31852:SF44 - FAMILY NOT NAMED // EMB|CAB53482.1			1.57274e-06	2.34757e-14		5.89896e-10	5.26374e-05
Solyc04g078810.3	blue	PTHR31471:SF13 - REMORIN-LIKE PROTEIN			9.21022e-05	0.00105515			0.00284953
Solyc04g078930.3	blue	K01176 - alpha-amylase (E3.2.1.1, amyA, malS)			1.55728e-05	0.000523526		0.00623949	4.0783e-05
Solyc04g079050.2	blue	2.4.2.51 - Anthocyanidin 3-O-glucoside 2'''-O-xylosyltransferase						0.0448181	0.0138207
Solyc04g079100.3	blue	K15728 - phosphatidate phosphatase LPIN (LPIN)			0.0105558				0.0151757
Solyc04g079190.3	blue	PTHR23024//PTHR23024:SF131 - MEMBER OF 'GDXG' FAMILY OF LIPOLYTIC ENZYMES // CARBOXYLESTERASE 2-RELATED			0.00479953	0.013825			0.0490777
Solyc04g079340.3	blue	PTHR23054:SF29 - EXPRESSED PROTEIN			0.000168778	0.00425453			0.00182342
Solyc04g079470.3	blue	K13963 - serpin B (SERPINB)			0.00097641	0.0046266		0.0241081	0.00615481
Solyc04g079970.3	blue	K10579 - ubiquitin-conjugating enzyme E2 M (UBE2M, UBC12)			5.15514e-09	7.71459e-14		5.53137e-14	1.97955e-07
Solyc04g080230.3	blue	PF06708 - Protein of unknown function (DUF1195) (DUF1195)			0.010622	0.0127682		0.00494871	0.00996709
Solyc04g080250.3	blue	3.6.1.23 - dUTP diphosphatase / dUTPase			1.11144e-07	6.55459e-11		3.22053e-07	4.33694e-06
Solyc04g080790.3	blue	PTHR11850//PTHR11850:SF65 - HOMEOBOX PROTEIN TRANSCRIPTION FACTORS // BEL1-LIKE HOMEODOMAIN PROTEIN 6-RELATED				0.0352809
Solyc04g081130.1	blue	1.1.3.9 - Galactose oxidase / Beta-galactose oxidase			0.000480795	0.000930487		0.00261876	0.00735728
Solyc04g081290.3	blue	K06966 - uncharacterized protein (K06966)			4.07097e-08	7.67252e-09		5.43896e-06	2.94853e-07
Solyc04g081420.3	blue				0.000937662	0.00783295			0.0211242
Solyc04g081440.3	blue	3.2.1.26 - Beta-fructofuranosidase / Saccharase			2.93658e-11	5.46981e-12		4.99383e-12	5.49062e-10
Solyc04g081810.3	blue	PTHR10795//PTHR10795:SF328 - PROPROTEIN CONVERTASE SUBTILISIN/KEXIN // SUBFAMILY NOT NAMED			3.55827e-36	3.72789e-38		3.33635e-29	1.02568e-32
Solyc04g081860.3	blue	PTHR31235//PTHR31235:SF67 - FAMILY NOT NAMED // PEROXIDASE 64			4.15479e-10	1.98749e-15		3.45774e-23	1.66583e-11
Solyc04g082090.3	blue	PTHR10357//PTHR10357:SF118 - ALPHA-AMYLASE // ALPHA-AMYLASE 2-RELATED				0.0308622
Solyc04g082200.2	blue	PF00257 - Dehydrin (Dehydrin)			5.10696e-11	2.34497e-16		1.07112e-22	1.30408e-12
Solyc04g082270.3	blue	PF03087 - Arabidopsis protein of unknown function (DUF241)			7.45986e-06	0.000105492		0.000109855	2.50719e-06
Solyc04g082840.3	blue	K07760 - cyclin-dependent kinase [EC:2.7.11.22] (CDK)			5.57325e-05	0.000709464		0.0103209	0.00015202
Solyc04g082950.3	blue	PTHR21461:SF12 - F21O3.9 PROTEIN-RELATED			0.00219223	0.0167182			0.0107493
Solyc05g005000.3	blue	3.1.1.3//3.1.1.32 - Triacylglycerol lipase / Triglyceride lipase // Phospholipase A(1) / Phospholipase A1			0.00879742	6.51064e-05		0.00025857	0.0259625
Solyc05g005020.3	blue	2.7.9.4 - Alpha-glucan, water dikinase / Starch-related R1 protein			0.00260762	0.00100236			0.0330868
Solyc05g005040.3	blue	PTHR31375//PTHR31375:SF12 - FAMILY NOT NAMED // POLYGALACTURONASE			3.14722e-20	7.20917e-17		6.27587e-14	1.51047e-19
Solyc05g005080.3	blue	PTHR22298//PTHR22298:SF36 - ENDO-1,4-BETA-GLUCANASE // ENDOGLUCANASE 21-RELATED			3.82057e-10	1.33055e-28		1.12851e-37	3.49658e-09
Solyc05g005290.3	blue	PTHR32263:SF8 - INACTIVE POLY [ADP-RIBOSE] POLYMERASE SRO2-RELATED			0.00679081	0.00302134
Solyc05g005535.1	blue				3.14469e-11	6.33253e-09		1.24347e-07	1.24892e-12
Solyc05g005560.3	blue				0.000225279	0.00042608		3.04488e-05	1.15237e-05
Solyc05g005770.3	blue	PTHR13833//PTHR13833:SF46 - FAMILY NOT NAMED // NHL DOMAIN-CONTAINING PROTEIN			0.00746614	0.0375221
Solyc05g005920.3	blue	PTHR11654//PTHR11654:SF150 - OLIGOPEPTIDE TRANSPORTER-RELATED // SUBFAMILY NOT NAMED			0.000424901	0.00361281		1.85419e-07	9.63881e-09
Solyc05g006010.3	blue	PF00854//PF07690 - POT family (PTR2) // Major Facilitator Superfamily (MFS_1)		0.00433173	0.0401332		0.0166716	0.000385976	1.15576e-06
Solyc05g006020.3	blue	PTHR11119//PTHR11119:SF50 - XANTHINE-URACIL / VITAMIN C PERMEASE FAMILY MEMBER // NUCLEOBASE-ASCORBATE TRANSPORTER 7-RELATED			0.0286713	0.0195457
Solyc05g006390.1	blue				0.0478293	0.0474131
Solyc05g006550.3	blue	PTHR31355:SF3 - ARM REPEAT SUPERFAMILY PROTEIN-RELATED			6.27349e-05	0.00163507		0.00971652	0.000741496
Solyc05g006860.3	blue	PF00085//PF13098 - Thioredoxin (Thioredoxin) // Thioredoxin-like domain (Thioredoxin_2)			4.43312e-05	0.000344213		1.29945e-06	3.49404e-05
Solyc05g007290.2	blue	PTHR22870//PTHR22870:SF187 - REGULATOR OF CHROMOSOME CONDENSATION // SUBFAMILY NOT NAMED			0.00191548	0.000167351		0.00141655	0.0182863
Solyc05g007300.3	blue	PTHR12300//PTHR12300:SF51 - HVA22-LIKE PROTEINS // HVA22-LIKE PROTEIN C			0.00157558	0.0107315			0.00423274
Solyc05g007790.3	blue	PTHR11615//PTHR11615:SF81 - NITRATE, FROMATE, IRON DEHYDROGENASE // CASPARIAN STRIP MEMBRANE PROTEIN 5			0.00293108	0.0128442			0.0300508
Solyc05g007900.2	blue	PTHR22763//PTHR22763:SF77 - RING ZINC FINGER PROTEIN // SUBFAMILY NOT NAMED			0.00263715	0.0186792		0.0217062	0.00187994
Solyc05g008060.3	blue	K13947 - auxin efflux carrier family (PIN)			2.68262e-07	7.73941e-10		2.84639e-07	1.74417e-05
Solyc05g008090.3	blue	PF06886 - Targeting protein for Xklp2 (TPX2) (TPX2)			0.00515095	0.0169046
Solyc05g008150.3	blue	PF02977 - Carboxypeptidase A inhibitor (CarbpepA_inh)				0.0297431		7.31331e-08	0.000128561
Solyc05g008350.3	blue	PTHR19241//PTHR19241:SF262 - ATP-BINDING CASSETTE TRANSPORTER // ABC TRANSPORTER G FAMILY MEMBER 7			0.00221223	0.0150214			0.0235121
Solyc05g008440.2	blue				4.06842e-08	2.22933e-07		8.03046e-05	3.07208e-06
Solyc05g008580.3	blue	2.7.8.8 - CDP-diacylglycerol--serine O-phosphatidyltransferase / Phosphatidylserine synthase			1.20284e-14	5.88777e-15		4.06374e-12	7.48891e-12
Solyc05g008920.3	blue	PF05623 - Protein of unknown function (DUF789) (DUF789)			2.27685e-05	0.000206143		0.0098366	0.00047217
Solyc05g009620.3	blue	PF04749 - PLAC8 family (PLAC8)			0.00175631	3.77063e-05		0.00505799	0.0241702
Solyc05g009820.3	blue	PTHR13778:SF4 - GALACTURONOSYLTRANSFERASE-LIKE 3-RELATED			0.0148118	0.0091049			0.0334045
Solyc05g009880.3	blue	PTHR12565//PTHR12565:SF139 - STEROL REGULATORY ELEMENT-BINDING PROTEIN // SUBFAMILY NOT NAMED			8.98634e-15	9.19555e-14		7.06915e-18	1.0192e-20
Solyc05g011890.1	blue	PTHR11783//PTHR11783:SF84 - SULFOTRANSFERASE SULT // SUBFAMILY NOT NAMED			2.39215e-08	5.56353e-07		6.98245e-07	1.14955e-09
Solyc05g012110.3	blue	PTHR11054:SF2 - 6-PHOSPHOGLUCONOLACTONASE 1-RELATED			0.000552425	0.00011223		0.000894301	0.00172359
Solyc05g012160.3	blue	K18635 - protein SPIRAL1 and related proteins (SPR1)			0.000751226	0.000741742		0.0339236	0.0124809
Solyc05g012290.3	blue	PTHR12770:SF22 - UPF0420 PROTEIN C16ORF58			0.00442885	0.00897747			0.0249104
Solyc05g012460.3	blue	PTHR13748:SF31 - COBW DOMAIN-CONTAINING PROTEIN 1				0.0276713
Solyc05g012560.2	blue	PTHR13139//PTHR13139:SF47 - RING FINGER AND CCCH-TYPE ZINC FINGER DOMAIN-CONTAINING PROTEIN // SUBFAMILY NOT NAMED							0.0195283
Solyc05g012620.3	blue	PF08755 - Hemimethylated DNA-binding protein YccV like (YccV-like)			4.13572e-07	1.74107e-06		0.00190206	3.27274e-05
Solyc05g012805.1	blue				0.0146897	0.000766206
Solyc05g013440.3	blue	1.4.3.21 - Primary-amine oxidase / Copper amine oxidase			5.6041e-09	9.72175e-08		5.55161e-25	7.21865e-27
Solyc05g013495.1	blue	PF14009 - Domain of unknown function (DUF4228) (DUF4228)	0.0487694		0.00781459	0.0100497			0.0317303
Solyc05g013570.3	blue	PF03000 - NPH3 family (NPH3)			0.0308971	0.0114515
Solyc05g013730.3	blue	PTHR31933//PTHR31933:SF1 - FAMILY NOT NAMED // GENOMIC DNA, CHROMOSOME 3, BAC CLONE:F20C19			0.00400488	0.00453319			0.0302932
Solyc05g013870.3	blue	PF14576//PF14577 - Sieve element occlusion N-terminus (SEO_N) // Sieve element occlusion C-terminus (SEO_C)	0.0436873
Solyc05g013980.3	blue					0.0225656
Solyc05g014030.3	blue	PTHR22870:SF24 - GENOMIC DNA, CHROMOSOME 3, P1 CLONE: MPE11			0.0001046	0.0016377		0.00646357	0.0010224
Solyc05g014110.3	blue	3.1.1.73 - Feruloyl esterase / Hydroxycinnamoyl esterase			0.0460213	0.00474369
Solyc05g014510.3	blue	PTHR24198//PTHR24198:SF77 - ANKYRIN REPEAT AND PROTEIN KINASE DOMAIN-CONTAINING PROTEIN // SUBFAMILY NOT NAMED			0.000332047	0.00306141		0.0372013	0.00179212
Solyc05g015300.3	blue	PTHR31236//PTHR31236:SF2 - FAMILY NOT NAMED // DEHYDRATION-RESPONSIVE PROTEIN RD22			2.77478e-15	4.11861e-14		3.77523e-32	8.48161e-21
Solyc05g015350.3	blue	1.14.13.21 - Flavonoid 3'-monooxygenase / Flavonoid 3'-hydroxylase			0.00216369	0.00191229		0.0452402	0.0309916
Solyc05g015510.3	blue	PTHR31251:SF1 - SQUAMOSA PROMOTER-BINDING-LIKE PROTEIN 10-RELATED			0.0134767	0.0242371			0.0250923
Solyc05g015610.3	blue	K14489 - arabidopsis histidine kinase 2/3/4 (cytokinin receptor) (AHK2_3_4)	0.0232887			0.00207543		0.0221019
Solyc05g015840.3	blue	PF03110 - SBP domain (SBP)			1.23112e-05	3.35095e-06		0.00425362	0.000842948
Solyc05g015861.1	blue	4.1.2.27 - Sphinganine-1-phosphate aldolase / Sphingosine-1-phosphate lyase			0.00103695	0.0102881		0.0369318	0.0155241
Solyc05g017980.3	blue	PF07058 - Microtubule-associated protein 70 (MAP70)	0.0402593			0.0168882	0.0396347	0.00576954
Solyc05g018615.1	blue	PTHR22870//PTHR22870:SF193 - REGULATOR OF CHROMOSOME CONDENSATION // SUBFAMILY NOT NAMED			1.64046e-10	4.84495e-11		5.7256e-10	2.17034e-08
Solyc05g023720.1	blue	K02634 - apocytochrome f (petA)				0.00406847
Solyc05g024260.3	blue	PTHR10791//PTHR10791:SF34 - RAG1-ACTIVATING PROTEIN 1 // BIDIRECTIONAL SUGAR TRANSPORTER SWEET15	0.0128428			0.00404484
Solyc05g025510.3	blue	PTHR22838:SF3 - WD-REPEAT PROTEIN-LIKE			0.0015748	0.000238428		0.0181546	0.0197495
Solyc05g025905.1	blue	2.4.1.21 - Starch synthase / Starch (bacterial glycogen) synthase			0.0431187	0.00736357
Solyc05g042030.3	blue	PTHR12505 - PHD FINGER TRANSCRIPTION FACTOR			1.51408e-07	1.11375e-06		9.70243e-05	1.05739e-05
Solyc05g044610.2	blue	PTHR12616:SF1 - VACUOLAR PROTEIN SORTING-ASSOCIATED PROTEIN 41 HOMOLOG			0.00432676	0.0200989
Solyc05g047580.3	blue	K01853 - cycloartenol synthase (E5.4.99.8)				0.0457324
Solyc05g047680.3	blue	PTHR24298//PTHR24298:SF46 - FAMILY NOT NAMED // CYTOCHROME P450 78A6-RELATED			6.60066e-20	1.05116e-24		2.88324e-34	3.67042e-27
Solyc05g049990.3	blue	PTHR22814:SF77 - HEAVY-METAL-ASSOCIATED DOMAIN-CONTAINING PROTEIN			2.35477e-06	5.67544e-06		3.09504e-05	3.41968e-05
Solyc05g050130.3	blue	K01183 - chitinase (E3.2.1.14)			0.026023	0.00808609
Solyc05g050220.3	blue	PTHR22952//PTHR22952:SF125 - CAMP-RESPONSE ELEMENT BINDING PROTEIN-RELATED // SUBFAMILY NOT NAMED			0.0134132	0.0320996
Solyc05g050325.1	blue	K17525 - chitinase domain-containing protein 1 (CHID1)			0.0241529	0.0245091		0.0344218
Solyc05g050510.3	blue	KOG3399 - Predicted Yippee-type zinc-binding protein			0.000811516	0.000769967		0.0313707	0.00640248
Solyc05g051560.3	blue	PTHR24089//PTHR24089:SF292 - FAMILY NOT NAMED // MITOCHONDRIAL ADENINE NUCLEOTIDE TRANSPORTER BTL2-RELATED							0.0436376
Solyc05g051590.3	blue	PTHR10231:SF3 - CMP-SIALIC ACID TRANSPORTER 5				0.0479698
Solyc05g051810.1	blue			0.00626161	0.0367407		0.0179077	7.10741e-08	8.79029e-09
Solyc05g051940.3	blue	KOG1330 - Sugar transporter/spinster transmembrane protein			0.04276				0.0283822
Solyc05g052070.3	blue	K07874 - Ras-related protein Rab-1A (RAB1A)			0.000444436	8.35864e-07		2.63038e-05	0.00216893
Solyc05g052270.2	blue	PTHR24347//PTHR24347:SF167 - SERINE/THREONINE-PROTEIN KINASE // CBL-INTERACTING SERINE/THREONINE-PROTEIN KINASE 2			0.0181646	0.0245953		0.0315081	0.0252561
Solyc05g052280.3	blue	PTHR31388:SF24 - PEROXIDASE 52			1.86636e-12	1.15339e-15		7.12038e-17	1.89972e-13
Solyc05g052610.3	blue	PTHR24078:SF261 - DNAJ (HSP40) HOMOLOG, SUBFAMILY A, MEMBER 3A			4.95096e-06	0.000134961		0.00240275	9.08947e-06
Solyc05g052630.3	blue				1.08439e-07	2.8229e-10		4.33531e-08	6.67251e-07
Solyc05g052760.3	blue	K05857 - phosphatidylinositol phospholipase C, delta (PLCD)			1.72294e-16	1.66954e-21		7.57047e-18	3.73206e-15
Solyc05g052980.3	blue	PTHR13832//PTHR13832:SF219 - PROTEIN PHOSPHATASE 2C // PROTEIN PHOSPHATASE 2C 3-RELATED			0.0102988	6.08614e-05		7.35526e-06	0.00504225
Solyc05g053310.3	blue	PTHR33178//PTHR33178:SF2 - FAMILY NOT NAMED // PROTEIN POP3-RELATED			0.00506298	0.00146873		0.032414
Solyc05g054210.3	blue	PTHR22814//PTHR22814:SF79 - COPPER TRANSPORT PROTEIN ATOX1-RELATED // SUBFAMILY NOT NAMED			0.00913624	0.0458965
Solyc05g054340.3	blue	PTHR23155//PTHR23155:SF559 - LEUCINE-RICH REPEAT-CONTAINING PROTEIN // SUBFAMILY NOT NAMED				0.0325696
Solyc05g054410.3	blue	PTHR21717:SF9 - PROTEIN TBF1			1.19191e-12	5.1918e-12		1.78876e-11	9.25702e-14
Solyc05g054820.1	blue	PTHR12542:SF26 - EXOCYST SUBUNIT EXO70 FAMILY PROTEIN H1-RELATED			0.0107179	0.00418954		0.00745496	0.0325707
Solyc05g054890.3	blue	PF00005//PF01061//PF02298 - ABC transporter (ABC_tran) // ABC-2 type transporter (ABC2_membrane) // Plastocyanin-like domain (Cu_bind_like)						0.0411896
Solyc05g055010.3	blue	PF00076 - RNA recognition motif. (a.k.a. RRM, RBD, or RNP domain) (RRM_1)			0.0320327	0.0448369
Solyc05g055160.3	blue	K09503 - DnaJ homolog subfamily A member 2 (DNAJA2)			1.0835e-25	3.2803e-45		6.18762e-52	4.47514e-23
Solyc05g055343.1	blue	PTHR11926//PTHR11926:SF414 - GLUCOSYL/GLUCURONOSYL TRANSFERASES // SUBFAMILY NOT NAMED			0.000108974	4.24773e-07		0.000927677	0.00193571
Solyc05g055420.3	blue	2.4.1.224 - Glucuronosyl-N-acetylglucosaminyl-proteoglycan 4-alpha-N- acetylglucosaminyltransferase / acetylglucosaminyltransferase			0.00202305	0.010088			0.0291651
Solyc05g055460.1	blue				1.43799e-16	1.39664e-20		2.0113e-45	3.45315e-19
Solyc05g055680.3	blue	PTHR34124:SF2 - F16B3.27 PROTEIN			2.02922e-39	1.52332e-36		2.04099e-38	2.91877e-43
Solyc05g056120.3	blue	PTHR10071:SF194 - GATA TRANSCRIPTION FACTOR 8				0.0251239	0.0180835	3.32907e-05	0.047823
Solyc05g056230.3	blue	K08057 - calreticulin (CALR)			6.29932e-09	1.00059e-07		2.41313e-09	6.89784e-13
Solyc05g056240.3	blue	PTHR20863//PTHR20863:SF30 - ACYL CARRIER PROTEIN/ZINC FINGER PROTEIN 593-RELATED // SUBFAMILY NOT NAMED			0.0101112	0.0282769
Solyc05g056540.3	blue	1.2.1.76 - Succinate-semialdehyde dehydrogenase (acetylating) / Succinyl-CoA reductase			9.00068e-07	1.74605e-09		1.19251e-11	3.00413e-06
Solyc06g005160.3	blue	PTHR31356:SF10 - L-ASCORBATE PEROXIDASE 2, CYTOSOLIC			0.0435449			0.00619942	0.0305084
Solyc06g005470.3	blue	PF01439 - Metallothionein (Metallothio_2)			0.000645148	1.42934e-28		2.18139e-45	0.00424879
Solyc06g005750.3	blue	K14424 - 4-alpha-methyl-delta7-sterol-4alpha-methyl oxidase (SMO2)			0.00194821	0.0188567		0.00154299	4.56277e-05
Solyc06g007110.3	blue	KOG2401 - Predicted MutS-related protein involved in mismatch repair						0.0074651	0.00486322
Solyc06g007120.3	blue	K05857 - phosphatidylinositol phospholipase C, delta (PLCD)			0.000372667	0.0047019		0.013387	0.000532856
Solyc06g007660.2	blue	PTHR22536//PTHR22536:SF2 - LUNG CANCER METASTASIS-RELATED LCMR1 PROTEIN // SUBFAMILY NOT NAMED			0.00256478	0.0089078			0.0141465
Solyc06g007800.3	blue	PTHR14110//PTHR14110:SF10 - MITOCHONDRIAL IMPORT INNER MEMBRANE TRANSLOCASE SUBUNIT TIM22 // SUBFAMILY NOT NAMED			0.00124213	0.00175006		0.00388514	0.027893
Solyc06g007980.3	blue	K05841 - sterol 3beta-glucosyltransferase [EC:2.4.1.173] Glc b1-3 sterol (E2.4.1.173)			0.00350835	0.0259085			0.0424519
Solyc06g008720.3	blue	PTHR23336:SF14 - CW-TYPE ZINC-FINGER PROTEIN				0.000903729		0.0289315
Solyc06g008740.3	blue	PTHR12506:SF19 - ZINC FINGER CCCH DOMAIN-CONTAINING PROTEIN 32			0.00516088	0.0352093			0.0328742
Solyc06g008980.3	blue								0.0449078
Solyc06g008990.1	blue	PF11250 - Fantastic Four meristem regulator (FAF)			2.18322e-08	4.06172e-08		1.20975e-05	3.41117e-06
Solyc06g009120.3	blue				0.0494215	0.0149743		0.0475387	0.0255671
Solyc06g009400.3	blue	PTHR30115:SF11 - NITROGEN REGULATORY PROTEIN P-II HOMOLOG			9.31479e-09	3.2955e-08		5.94852e-07	2.76537e-09
Solyc06g009790.3	blue	PF00295 - Glycosyl hydrolases family 28 (Glyco_hydro_28)			0.00179089	0.0143935			0.0298623
Solyc06g011350.3	blue	PTHR19139//PTHR19139:SF158 - AQUAPORIN TRANSPORTER // AQUAPORIN PIP2-4-RELATED			1.59077e-40	4.19079e-68		2.39759e-147	4.14613e-58
Solyc06g011370.3	blue	PTHR11638:SF86 - CHAPERONE PROTEIN CLPB4, MITOCHONDRIAL	0.0493462		0.0470355	0.00131501
Solyc06g011540.3	blue	PTHR13140:SF390 - MYOSIN-11-RELATED			0.00458288	0.000118932		0.00230235	0.016544
Solyc06g031697.1	blue	PF00892 - EamA-like transporter family (EamA)			0.000162941	0.000169547		0.0304337	0.00502929
Solyc06g035560.2	blue	PTHR11945:SF208 - MADS-BOX PROTEIN SOC1	0.0344214
Solyc06g035720.3	blue	PTHR12329:SF11 - BAG FAMILY MOLECULAR CHAPERONE REGULATOR 2-RELATED			0.00916668	0.0303086	0.0392832	2.19211e-09	0.00105609
Solyc06g036100.3	blue	PTHR10283//PTHR10283:SF94 - SOLUTE CARRIER FAMILY 13 MEMBER // SUBFAMILY NOT NAMED			5.37793e-05	0.000486884		0.0232833	0.00101268
Solyc06g036260.3	blue	1.14.13.129 - Beta-carotene 3-hydroxylase / Beta-carotene 3,3'-monooxygenase			1.37075e-48	4.85946e-87		1.31577e-73	6.57128e-44
Solyc06g036290.3	blue	PTHR11528//PTHR11528:SF47 - HEAT SHOCK PROTEIN 90 // SUBFAMILY NOT NAMED			9.4795e-15	1.12353e-15		2.85796e-29	1.08049e-26
Solyc06g036310.3	blue	PTHR22814//PTHR22814:SF129 - COPPER TRANSPORT PROTEIN ATOX1-RELATED // COPPER TRANSPORT FAMILY PROTEIN-RELATED				0.0296576
Solyc06g036720.3	blue	PTHR15204 - SCYTHE/BAT3			0.0184374	0.0137147
Solyc06g043250.3	blue	PF00069//PF00582 - Protein kinase domain (Pkinase) // Universal stress protein family (Usp)				0.0389462
Solyc06g048520.3	blue	PTHR15860//PTHR15860:SF5 - UNCHARACTERIZED RING FINGER-CONTAINING PROTEIN // SUBFAMILY NOT NAMED	0.0160306			0.01225
Solyc06g050350.3	blue	PF05701 - Weak chloroplast movement under blue light (WEMBL)				0.0232728		0.0400115	0.0479498
Solyc06g050440.3	blue	PTHR31388:SF24 - PEROXIDASE 52			0.00025653	1.85573e-06		4.75472e-05	0.00297059
Solyc06g050900.3	blue	PTHR11654:SF155 - PROTEIN NRT1/ PTR FAMILY 5.1			5.97934e-05	0.00108583		0.000142589	1.15074e-05
Solyc06g051260.3	blue	PTHR12565//PTHR12565:SF181 - STEROL REGULATORY ELEMENT-BINDING PROTEIN // SUBFAMILY NOT NAMED			0.0132077	0.044712
Solyc06g051270.3	blue	2.7.7.22 - Mannose-1-phosphate guanylyltransferase (GDP) / GDP-mannose pyrophosphorylase			2.48191e-19	9.19075e-28		3.08222e-22	1.7529e-18
Solyc06g051790.3	blue	PTHR12271:SF40 - POLY(A) RNA POLYMERASE GLD2			0.0451371	0.0477261
Solyc06g051930.3	blue	PTHR11817:SF28 - PLASTIDIAL PYRUVATE KINASE 4, CHLOROPLASTIC			0.0340587			0.0368058	0.0105559
Solyc06g053420.3	blue	KOG1032 - Uncharacterized conserved protein, contains GRAM domain			0.000707641	0.00232066			0.00719365
Solyc06g053653.1	blue	PF05514 - HR-like lesion-inducing (HR_lesion)			3.37438e-08	5.70513e-08		0.000181401	6.44857e-06
Solyc06g053910.3	blue	PF04720 - PDDEXK-like family of unknown function (PDDEXK_6)			0.000449419	0.00377296		0.0407552	0.00128405
Solyc06g054280.1	blue					0.0206421
Solyc06g054420.3	blue	PTHR10383//PTHR10383:SF24 - SERINE INCORPORATOR // SUBFAMILY NOT NAMED			1.87626e-11	9.31917e-14		9.64444e-10	7.59039e-10
Solyc06g054500.1	blue	K00430 - peroxidase (E1.11.1.7)				0.0297431
Solyc06g054640.2	blue	PF04720 - PDDEXK-like family of unknown function (PDDEXK_6)	0.0397637		0.0122745	7.36316e-05		0.00517731
Solyc06g054690.3	blue				0.00358108	0.0202144			0.0488035
Solyc06g059760.3	blue	PTHR10378//PTHR10378:SF10 - LIM DOMAIN-BINDING PROTEIN // SUBFAMILY NOT NAMED				0.0169859
Solyc06g059860.3	blue				0.00495633	0.0349201			0.0260708
Solyc06g059870.1	blue				1.35678e-05	2.44187e-05		9.90888e-11	3.71662e-11
Solyc06g060100.3	blue	5.3.1.8 - Mannose-6-phosphate isomerase / Phosphomannose isomerase							0.0317739
Solyc06g060110.3	blue	PTHR22950//PTHR22950:SF205 - AMINO ACID TRANSPORTER // AMINO ACID PERMEASE 3-RELATED			1.94227e-15	4.52758e-15		3.20229e-37	2.37544e-39
Solyc06g060230.3	blue	PTHR31719//PTHR31719:SF3 - FAMILY NOT NAMED // GRAB1-LIKE PROTEIN			2.63721e-06	2.25142e-06		4.69765e-06	5.72564e-07
Solyc06g060530.1	blue	PTHR11206//PTHR11206:SF93 - MULTIDRUG RESISTANCE PROTEIN // MATE EFFLUX FAMILY PROTEIN			0.0422202	0.0344817
Solyc06g060600.2	blue	PTHR10788:SF38 - TREHALOSE-PHOSPHATE PHOSPHATASE F-RELATED			0.000116143	0.00204844		0.00126292	0.000273688
Solyc06g060620.3	blue	PTHR11654//PTHR11654:SF78 - OLIGOPEPTIDE TRANSPORTER-RELATED // PROTEIN NRT1/ PTR FAMILY 6.3			5.24647e-11	6.14964e-09		3.64009e-06	1.4876e-08
Solyc06g060880.3	blue	PTHR13789//PTHR13789:SF224 - MONOOXYGENASE // CTF2A LIKE OXIDOREDUCTASE-RELATED			0.000562466	0.000504562			0.0103813
Solyc06g062430.3	blue	K00469 - inositol oxygenase (MIOX)			7.36349e-18	2.26033e-15		1.92567e-18	3.87181e-21
Solyc06g062450.3	blue	PTHR27003//PTHR27003:SF105 - FAMILY NOT NAMED // LEUCINE-RICH REPEAT PROTEIN KINASE-RELATED			1.95714e-09	1.13504e-08		9.87065e-09	1.24891e-09
Solyc06g062960.2	blue	PF07911 - Protein of unknown function (DUF1677) (DUF1677)			0.016458			0.000420118	0.00256978
Solyc06g063000.3	blue	K13201 - nucleolysin TIA-1/TIAR (TIA1, TIAL1)			0.00508152	0.008218			0.014366
Solyc06g063230.3	blue				2.1532e-07	6.18864e-06		0.00263699	1.67947e-05
Solyc06g063240.3	blue	PTHR31288//PTHR31288:SF5 - FAMILY NOT NAMED // GENOMIC DNA, CHROMOSOME 3, P1 CLONE: MXL8-RELATED				0.0108145		0.00117341
Solyc06g064610.1	blue				0.000178147	0.000921819		0.00357904	0.00192676
Solyc06g064780.1	blue	PTHR23155//PTHR23155:SF569 - LEUCINE-RICH REPEAT-CONTAINING PROTEIN // SUBFAMILY NOT NAMED			0.0270302			0.0245601	0.0136973
Solyc06g065030.3	blue	K17087 - transmembrane 9 superfamily member 3 (TM9SF3)			0.00779672	0.0185692
Solyc06g065040.3	blue	PF00010 - Helix-loop-helix DNA-binding domain (HLH)			8.81892e-18	9.73558e-19		3.72674e-11	3.10041e-14
Solyc06g065680.3	blue	PTHR10177//PTHR10177:SF212 - CYCLINE // CYCLIN-A2-1-RELATED			0.000206948	0.0050764			0.00246351
Solyc06g066030.3	blue	PF06886 - Targeting protein for Xklp2 (TPX2) (TPX2)			4.87944e-06	6.46982e-05		0.000106468	1.03597e-06
Solyc06g066860.2	blue				4.31322e-08	2.83011e-06		1.36513e-10	1.15379e-16
Solyc06g067880.3	blue	K03661 - V-type H+-transporting ATPase 21kDa proteolipid subunit (ATPeV0B, ATP6F)			4.5136e-05	2.70101e-06		2.08966e-06	0.00104187
Solyc06g068220.3	blue	PTHR10992:SF730 - HYDROLASE-RELATED			2.15756e-07	3.14765e-06		0.00259865	8.15134e-05
Solyc06g068230.3	blue	PTHR12601:SF18 - TETRATRICOPEPTIDE REPEAT-CONTAINING PROTEIN			0.00285132	0.0197706			0.0132776
Solyc06g068500.3	blue	PTHR24078 - DNAJ HOMOLOG SUBFAMILY C MEMBER			1.4927e-05	6.23014e-06		0.000691564	0.000414105
Solyc06g068570.3	blue	K09285 - AP2-like factor, ANT lineage (OVM, ANT)				0.015705
Solyc06g068740.3	blue	K00079 - carbonyl reductase 1 (CBR1)			2.57587e-05	0.000452712		0.00883114	0.000236627
Solyc06g068930.2	blue	K13464 - jasmonate ZIM domain-containing protein (JAZ)			2.06345e-14	1.22158e-12		7.24634e-11	9.33106e-13
Solyc06g068970.3	blue	1.3.99.5 - 3-oxo-5-alpha-steroid 4-dehydrogenase (acceptor) / Steroid 5-alpha-reductase			1.61817e-06	4.56435e-05		0.00295456	2.5041e-05
Solyc06g069030.3	blue				4.40512e-05	0.000279183		0.0279061	0.00213301
Solyc06g069120.3	blue				1.06461e-39	1.41487e-53		1.6034e-54	3.09333e-36
Solyc06g069180.3	blue	K03456 - serine/threonine-protein phosphatase 2A regulatory subunit A (PPP2R1)			0.000707108	0.00740031		0.00852452	0.00721375
Solyc06g069760.3	blue	PTHR31089:SF4 - CYCLIC DOF FACTOR 2-RELATED			4.12116e-13	3.0907e-12		6.17801e-11	1.63339e-14
Solyc06g069820.3	blue	PF05056 - Protein of unknown function (DUF674) (DUF674)			0.000202518	0.00150517		0.0390539	0.00333945
Solyc06g071230.3	blue	PTHR12374//PTHR12374:SF25 - TRANSCRIPTIONAL ADAPTOR 2 ADA2 -RELATED // SUBFAMILY NOT NAMED			3.1413e-07	5.96153e-06		6.57324e-05	5.34146e-06
Solyc06g071330.3	blue	PTHR11119:SF48 - NUCLEOBASE-ASCORBATE TRANSPORTER 5-RELATED			0.000251589	0.00418755		0.0055603	9.23598e-05
Solyc06g071350.3	blue	PTHR15141//PTHR15141:SF52 - TRANSCRIPTION ELONGATION FACTOR B POLYPEPTIDE 3 // BAH AND TFIIS DOMAIN-CONTAINING PROTEIN			0.0176604			0.0128733
Solyc06g071420.3	blue	K16284 - E3 ubiquitin-protein ligase SIS3 [EC:6.3.2.19] (SIS3)							0.0287058
Solyc06g071570.3	blue	PTHR11654//PTHR11654:SF141 - OLIGOPEPTIDE TRANSPORTER-RELATED // SUBFAMILY NOT NAMED			0.000785732	0.000265028		0.0357422	0.0167032
Solyc06g072050.3	blue	PTHR13780//PTHR13780:SF45 - AMP-ACTIVATED PROTEIN KINASE, GAMMA REGULATORY SUBUNIT // CBS DOMAIN-CONTAINING PROTEIN CBSCBSPB4-RELATED			0.00755522	0.0291713		0.0448174	0.0106094
Solyc06g072410.2	blue	PF05056 - Protein of unknown function (DUF674) (DUF674)			3.40822e-05	0.000550285		0.0109951	0.000725616
Solyc06g072430.2	blue	PF00612//PF02179 - IQ calmodulin-binding motif (IQ) // BAG domain (BAG)			0.0199695	0.0170876		0.00636296	0.0492383
Solyc06g072660.3	blue	PTHR13468//PTHR13468:SF6 - DEK PROTEIN // DEK DOMAIN-CONTAINING CHROMATIN ASSOCIATED PROTEIN				0.0460472		0.0341569
Solyc06g072700.3	blue	PTHR22814//PTHR22814:SF13 - COPPER TRANSPORT PROTEIN ATOX1-RELATED // FARNESYLATED PROTEIN 3-RELATED			0.000252636	0.00209276		0.0402214	0.00255591
Solyc06g072710.3	blue	K03086 - RNA polymerase primary sigma factor (SIG1, rpoD)			0.000202452	0.000123017		0.0290736	0.00426883
Solyc06g073110.3	blue	PF06075 - Plant protein of unknown function (DUF936) (DUF936)			0.000519747	0.00681476			0.0125229
Solyc06g073133.1	blue	PTHR34204//PTHR34204:SF2 - FAMILY NOT NAMED // RNA-BINDING ASCH DOMAIN PROTEIN							0.0329691
Solyc06g073180.3	blue	PTHR31832:SF8 - B-BOX TYPE ZINC FINGER-CONTAINING PROTEIN-RELATED			2.58777e-54	4.88699e-79		1.17439e-65	1.99065e-49
Solyc06g073245.1	blue	PTHR10891:SF586 - CALMODULIN-LIKE PROTEIN 6-RELATED			0.0235209	0.00128535		0.0391321
Solyc06g073320.3	blue	2.7.7.69 - GDP-L-galactose phosphorylase			3.32892e-09	3.57001e-09		1.56533e-15	8.62557e-14
Solyc06g073520.3	blue	PTHR14233//PTHR14233:SF16 - DUF914-RELATED // SUBFAMILY NOT NAMED			6.11192e-05	0.00106087			0.00220332
Solyc06g073540.3	blue	PTHR22891//PTHR22891:SF51 - EUKARYOTIC TRANSLATION INITIATION FACTOR 2C // SUBFAMILY NOT NAMED			0.0451647	0.0148593
Solyc06g073570.3	blue	PTHR24298//PTHR24298:SF107 - FAMILY NOT NAMED // CYTOCHROME P450 82G1			0.000726627	0.00447084			0.0126223
Solyc06g073580.3	blue	1.14.11.11 - Hyoscyamine (6S)-dioxygenase / Hyoscyamine 6-beta-hydroxylase			0.022993	1.9925e-08		0.000169856
Solyc06g073900.3	blue	1.3.5.1 - Succinate dehydrogenase (quinone) / Succinic dehydrogenase			0.00150438	0.00093918		0.0215781	0.013966
Solyc06g073970.2	blue	PTHR31042//PTHR31042:SF4 - FAMILY NOT NAMED // CORE-2/I-BRANCHING BETA-1,6-N-ACETYLGLUCOSAMINYLTRANSFERASE FAMILY PROTEIN			4.484e-11	2.63501e-09		6.02037e-07	1.2681e-09
Solyc06g074070.3	blue	PF07714//PF08263 - Protein tyrosine kinase (Pkinase_Tyr) // Leucine rich repeat N-terminal domain (LRRNT_2)			0.00199405	0.0166561		0.00216855	1.2127e-05
Solyc06g074120.3	blue	PTHR11850//PTHR11850:SF79 - HOMEOBOX PROTEIN TRANSCRIPTION FACTORS // SUBFAMILY NOT NAMED			0.0181104	0.0158089
Solyc06g074190.3	blue		0.0392966		1.6142e-06	4.07069e-16		3.57867e-20	7.47388e-07
Solyc06g074670.3	blue	K12449 - UDP-apiose/xylose synthase (AXS)			0.000162561	0.00141116		0.0289102	0.00151658
Solyc06g074820.3	blue	PTHR19139:SF52 - AQUAPORIN TIP1-1			2.77238e-22	3.5328e-28		7.78026e-39	4.56906e-20
Solyc06g075080.3	blue	K03426 - NAD+ diphosphatase (E3.6.1.22, NUDT12, nudC)			5.43377e-06	6.19148e-15		5.00827e-09	0.000185783
Solyc06g075320.3	blue	PTHR31189//PTHR31189:SF2 - FAMILY NOT NAMED // CUPIN DOMAIN-CONTAINING PROTEIN				0.0256811
Solyc06g075660.3	blue	PTHR10641//PTHR10641:SF484 - MYB-LIKE DNA-BINDING PROTEIN MYB // TRANSCRIPTION FACTOR MYB48-RELATED			0.000561618	7.78371e-05		0.000235823	0.000118967
Solyc06g076020.3	blue	PTHR19375//PTHR19375:SF174 - HEAT SHOCK PROTEIN 70KDA // SUBFAMILY NOT NAMED			3.99566e-18	9.57855e-17		5.57618e-47	1.02943e-39
Solyc06g076250.3	blue					0.0479085
Solyc06g076400.3	blue	PTHR13832//PTHR13832:SF219 - PROTEIN PHOSPHATASE 2C // PROTEIN PHOSPHATASE 2C 3-RELATED			0.000509137	0.00432157			0.0108431
Solyc06g076640.3	blue	PTHR11588//PTHR11588:SF97 - TUBULIN // TUBULIN BETA-4 CHAIN-RELATED			9.78831e-21	3.95627e-25		9.76916e-31	3.38835e-18
Solyc06g076670.3	blue	PTHR15241//PTHR15241:SF4 - TRANSFORMER-2-RELATED // TRANSFORMER-SR RIBONUCLEOPROTEIN-RELATED			2.95341e-10	4.69156e-19		1.78033e-13	3.37037e-08
Solyc06g076880.3	blue	PTHR30546:SF11 - 1,4-BENZOQUINONE REDUCTASE-LIKE			0.00108416	0.000898488		0.0161097	0.00587252
Solyc06g082155.1	blue	2.7.1.105 - 6-phosphofructo-2-kinase / Phosphofructokinase 2			0.000213588	0.000539549		0.00445981	0.000234436
Solyc06g082210.1	blue	PTHR31165//PTHR31165:SF6 - FAMILY NOT NAMED // PROTEIN LIGHT-DEPENDENT SHORT HYPOCOTYLS 6				0.0289444		0.010082
Solyc06g083220.3	blue	PTHR14241:SF10 - VON WILLEBRAND FACTOR A DOMAIN-CONTAINING PROTEIN DDB_G0292188			0.0273424	0.0102275
Solyc06g083660.3	blue	PTHR21726//PTHR21726:SF36 - PHOSPHATIDYLINOSITOL N-ACETYLGLUCOSAMINYLTRANSFERASE SUBUNIT P DOWN SYNDROME CRITICAL REGION PROTEIN 5 -RELATED // SUBFAMILY NOT NAMED			9.31697e-09	1.37724e-07		6.86126e-05	6.68421e-07
Solyc06g083910.3	blue	1.14.11.11 - Hyoscyamine (6S)-dioxygenase / Hyoscyamine 6-beta-hydroxylase			0.0468793			0.00510098	0.00489218
Solyc06g084020.3	blue	PTHR11467:SF48 - HISTONE H1.1-RELATED			1.39493e-05	9.13548e-18		6.84033e-20	2.29425e-05
Solyc06g084180.3	blue	PF09253 - Pollen allergen ole e 6 (Ole-e-6)			2.27892e-14	3.05688e-12		1.17846e-08	1.06679e-12
Solyc06g084190.3	blue	PF14368 - Probable lipid transfer (LTP_2)			1.22887e-05	2.01341e-06		0.000252399	0.000486252
Solyc06g084290.3	blue	PTHR32285:SF65 - PROTEIN TRICHOME BIREFRINGENCE-LIKE 10-RELATED			0.000133953	0.00016916		0.0157706	0.00509145
Solyc06g084550.3	blue	PTHR14110//PTHR14110:SF5 - MITOCHONDRIAL IMPORT INNER MEMBRANE TRANSLOCASE SUBUNIT TIM22 // OUTER ENVELOPE PORE PROTEIN 16-4, CHLOROPLASTIC			0.003226	0.00763158			0.0342522
Solyc06g084590.3	blue	PF16401 - Domain of unknown function (DUF5009) (DUF5009)			0.0317885				0.0320104
Solyc07g005100.3	blue	PTHR11177:SF219 - CHITINASE-LIKE PROTEIN-RELATED			0.000543184	1.79654e-06		5.78273e-05	0.00314568
Solyc07g005210.3	blue	K03098 - apolipoprotein D and lipocalin family protein (APOD)			0.00505785	0.00122171
Solyc07g005330.3	blue	PTHR32227:SF62 - GLUCOSIDASE-LIKE PROTEIN			1.95895e-06	9.46935e-07		4.06135e-07	5.53655e-06
Solyc07g005390.3	blue	1.2.1.9 - Glyceraldehyde-3-phosphate dehydrogenase (NADP(+)) / Triosephosphate dehydrogenase			0.00681958				0.0269188
[truncated: 4,860 more rows]

## Sheet: Table S6
Table S6. Molecular function GO term enrichment performed for the modules obtained from the WGCNA analysis for both root and shoot tissues.
[truncated: 101 more rows]

[truncated: 2 more sheets: Table S7, Table S8]
